# Supplementary material for: The localized rise of a B.1.526 SARS-CoV-2 variant containing an E484K mutation in New York State
Source: bioRxiv or medRxiv preprint supplement (doi:10.1101/2021.02.26.21251868), 2021-03-01
Supplement: Supplementary file [file media-1.pdf]

We gratefully acknowledge the following Authors from the Originating laboratories responsible for obtaining the specimens, as well as the Submitting laboratories where the genome data were generated and shared via GISAID, on which this research is based.

All Submitters of data may be contacted directly via [www.gisaid.org](http://www.gisaid.org)

Authors are sorted alphabetically.

| Accession ID                                                                                                                                                                                                                                                                                                                                       | Originating Laboratory                    | Submitting Laboratory                                 | Authors                                                                                                                                                                       |
|----------------------------------------------------------------------------------------------------------------------------------------------------------------------------------------------------------------------------------------------------------------------------------------------------------------------------------------------------|-------------------------------------------|-------------------------------------------------------|-------------------------------------------------------------------------------------------------------------------------------------------------------------------------------|
| EPI_ISL_1015655, EPI_ISL_1015659, EPI_ISL_1015680, EPI_ISL_1015681, EPI_ISL_1015687, EPI_ISL_1015689, EPI_ISL_1015697, EPI_ISL_1015700, EPI_ISL_1015704, EPI_ISL_1015710, EPI_ISL_1015711                                                                                                                                                          |                                           |                                                       |                                                                                                                                                                               |
| see above                                                                                                                                                                                                                                                                                                                                          | Columbia University Irving Medical Center | Wadsworth Center, New York State Department of Health | Kirsten St. George, Daryl M. Lamson, Alexis Russel, Matthew Shudt, Melissa A Leisner, Jonathan Plitnick, Navjot Singh, John Kelly, Erasmus Schneider, Erica Lasek-Nesselquist |
| EPI_ISL_1016101, EPI_ISL_1016102, EPI_ISL_1016103, EPI_ISL_1016104, EPI_ISL_1016105, EPI_ISL_1016108                                                                                                                                                                                                                                               | URMC LABS                                 | Wadsworth Center, New York State Department of Health | Kirsten St. George, Daryl M. Lamson, Alexis Russel, Matthew Shudt, Melissa A Leisner, Jonathan Plitnick, Navjot Singh, John Kelly, Erasmus Schneider, Erica Lasek-Nesselquist |
| EPI_ISL_1016114, EPI_ISL_1016115, EPI_ISL_1016117                                                                                                                                                                                                                                                                                                  | Columbia University Irving Medical Center | Wadsworth Center, New York State Department of Health | Kirsten St. George, Daryl M. Lamson, Alexis Russel, Matthew Shudt, Melissa A Leisner, Jonathan Plitnick, Navjot Singh, John Kelly, Erasmus Schneider, Erica Lasek-Nesselquist |
| EPI_ISL_1016121, EPI_ISL_1016122                                                                                                                                                                                                                                                                                                                   | URMC LABS                                 | Wadsworth Center, New York State Department of Health | Kirsten St. George, Daryl M. Lamson, Alexis Russel, Matthew Shudt, Melissa A Leisner, Jonathan Plitnick, Navjot Singh, John Kelly, Erasmus Schneider, Erica Lasek-Nesselquist |
| EPI_ISL_1016130, EPI_ISL_1016132, EPI_ISL_1016133, EPI_ISL_1016137, EPI_ISL_1016141                                                                                                                                                                                                                                                                | THE MARY IMOGENE BASSETT HOSPITAL         | Wadsworth Center, New York State Department of Health | Kirsten St. George, Daryl M. Lamson, Alexis Russel, Matthew Shudt, Melissa A Leisner, Jonathan Plitnick, Navjot Singh, John Kelly, Erasmus Schneider, Erica Lasek-Nesselquist |
| EPI_ISL_1016146, EPI_ISL_1016149, EPI_ISL_1016157, EPI_ISL_1016158, EPI_ISL_1016167                                                                                                                                                                                                                                                                | NORTHWELL HEALTH LABORATORIES             | Wadsworth Center, New York State Department of Health | Kirsten St. George, Daryl M. Lamson, Alexis Russel, Matthew Shudt, Melissa A Leisner, Jonathan Plitnick, Navjot Singh, John Kelly, Erasmus Schneider, Erica Lasek-Nesselquist |
| EPI_ISL_1016169                                                                                                                                                                                                                                                                                                                                    | TEMPUS LABS INC                           | Wadsworth Center, New York State Department of Health | Kirsten St. George, Daryl M. Lamson, Alexis Russel, Matthew Shudt, Melissa A Leisner, Jonathan Plitnick, Navjot Singh, John Kelly, Erasmus Schneider, Erica Lasek-Nesselquist |
| EPI_ISL_1016175, EPI_ISL_1016176, EPI_ISL_1016177, EPI_ISL_1016181, EPI_ISL_1016182, EPI_ISL_1016184, EPI_ISL_1016185, EPI_ISL_1016186, EPI_ISL_1016191, EPI_ISL_1016193, EPI_ISL_1016194, EPI_ISL_1016196, EPI_ISL_1016197, EPI_ISL_1016199, EPI_ISL_1016200, EPI_ISL_1016205, EPI_ISL_1016209, EPI_ISL_1016216, EPI_ISL_1016217, EPI_ISL_1016219 |                                           |                                                       |                                                                                                                                                                               |
| see above                                                                                                                                                                                                                                                                                                                                          | MONTEFIORE MEDICAL CENTER LABORATORIES    | Wadsworth Center, New York State Department of Health | Kirsten St. George, Daryl M. Lamson, Alexis Russel, Matthew Shudt, Melissa A Leisner, Jonathan Plitnick, Navjot Singh, John Kelly, Erasmus Schneider, Erica Lasek-Nesselquist |
| EPI_ISL_1016222, EPI_ISL_1016223, EPI_ISL_1016229, EPI_ISL_1016242, EPI_ISL_1016243, EPI_ISL_1016244, EPI_ISL_1016245, EPI_ISL_1016246, EPI_ISL_1016247, EPI_ISL_1016248                                                                                                                                                                           | New York Presbyterian Hospital            | Wadsworth Center, New York State Department of Health | Kirsten St. George, Daryl M. Lamson, Alexis Russel, Matthew Shudt, Melissa A Leisner, Jonathan Plitnick, Navjot Singh, John Kelly, Erasmus Schneider, Erica Lasek-Nesselquist |
| EPI_ISL_1016249, EPI_ISL_1016250, EPI_ISL_1016251, EPI_ISL_1016252, EPI_ISL_1016253, EPI_ISL_1016254, EPI_ISL_1016255, EPI_ISL_1016256                                                                                                                                                                                                             | TEMPUS LABS INC                           | Wadsworth Center, New York State Department of Health | Kirsten St. George, Daryl M. Lamson, Alexis Russel, Matthew Shudt, Melissa A Leisner, Jonathan Plitnick, Navjot Singh, John Kelly, Erasmus Schneider, Erica Lasek-Nesselquist |
| EPI_ISL_1016257                                                                                                                                                                                                                                                                                                                                    | THE MARY IMOGENE BASSETT HOSPITAL         | Wadsworth Center, New York State Department of Health | Kirsten St. George, Daryl M. Lamson, Alexis Russel, Matthew Shudt, Melissa A Leisner, Jonathan Plitnick, Navjot Singh, John Kelly, Erasmus Schneider, Erica Lasek-Nesselquist |
| EPI_ISL_1016262, EPI_ISL_1016265, EPI_ISL_1016266                                                                                                                                                                                                                                                                                                  | New York Presbyterian Hospital            | Wadsworth Center, New York State Department of Health | Kirsten St. George, Daryl M. Lamson, Alexis Russel, Matthew Shudt, Melissa A Leisner, Jonathan Plitnick, Navjot Singh, John Kelly, Erasmus Schneider, Erica Lasek-Nesselquist |
| EPI_ISL_1016267                                                                                                                                                                                                                                                                                                                                    | Columbia University Irving Medical Center | Wadsworth Center, New York State Department of Health | Kirsten St. George, Daryl M. Lamson, Alexis Russel, Matthew Shudt, Melissa A Leisner, Jonathan Plitnick, Navjot Singh, John Kelly, Erasmus Schneider, Erica Lasek-Nesselquist |
| EPI_ISL_1016272                                                                                                                                                                                                                                                                                                                                    | New York Presbyterian Hospital            | Wadsworth Center, New York State Department of Health | Kirsten St. George, Daryl M. Lamson, Alexis Russel, Matthew Shudt, Melissa A Leisner, Jonathan Plitnick, Navjot Singh, John Kelly, Erasmus Schneider, Erica Lasek-Nesselquist |
| EPI_ISL_1016281, EPI_ISL_1016289, EPI_ISL_1016291, EPI_ISL_1016293, EPI_ISL_1016297                                                                                                                                                                                                                                                                | Columbia University Irving Medical Center | Wadsworth Center, New York State Department of Health | Kirsten St. George, Daryl M. Lamson, Alexis Russel, Matthew Shudt, Melissa A Leisner, Jonathan Plitnick, Navjot Singh, John Kelly, Erasmus Schneider, Erica Lasek-Nesselquist |
| EPI_ISL_1016304, EPI_ISL_1016306, EPI_ISL_1016308, EPI_ISL_1016309                                                                                                                                                                                                                                                                                 | New York Presbyterian Hospital            | Wadsworth Center, New York State Department of Health | Kirsten St. George, Daryl M. Lamson, Alexis Russel, Matthew Shudt, Melissa A Leisner, Jonathan Plitnick, Navjot Singh, John Kelly, Erasmus Schneider, Erica Lasek-Nesselquist |
| EPI_ISL_1016314, EPI_ISL_1016315, EPI_ISL_1016317, EPI_ISL_1016320                                                                                                                                                                                                                                                                                 | SUNY UPSTATE MEDICAL UNIVERSITY           | Wadsworth Center, New York State Department of Health | Kirsten St. George, Daryl M. Lamson, Alexis Russel, Matthew Shudt, Melissa A Leisner, Jonathan Plitnick, Navjot Singh, John Kelly, Erasmus Schneider, Erica Lasek-Nesselquist |
| EPI_ISL_1016328, EPI_ISL_1016330                                                                                                                                                                                                                                                                                                                   | Columbia University Irving Medical Center | Wadsworth Center, New York State Department of Health | Kirsten St. George, Daryl M. Lamson, Alexis Russel, Matthew Shudt, Melissa A Leisner, Jonathan Plitnick, Navjot Singh, John Kelly, Erasmus Schneider, Erica Lasek-Nesselquist |
| EPI_ISL_1016340                                                                                                                                                                                                                                                                                                                                    | WESTCHESTER MEDICAL CENTER                | Wadsworth Center, New York State Department of Health | Kirsten St. George, Daryl M. Lamson, Alexis Russel, Matthew Shudt, Melissa A Leisner, Jonathan Plitnick, Navjot Singh, John Kelly, Erasmus Schneider, Erica Lasek-Nesselquist |
| EPI_ISL_1016368, EPI_ISL_1016370                                                                                                                                                                                                                                                                                                                   | New York Presbyterian Hospital            | Wadsworth Center, New York State Department of Health | Kirsten St. George, Daryl M. Lamson, Alexis Russel, Matthew Shudt, Melissa A Leisner, Jonathan Plitnick, Navjot Singh, John Kelly, Erasmus Schneider, Erica Lasek-Nesselquist |
| EPI_ISL_1016373                                                                                                                                                                                                                                                                                                                                    | WESTCHESTER MEDICAL CENTER                | Wadsworth Center, New York State Department of Health | Kirsten St. George, Daryl M. Lamson, Alexis Russel, Matthew Shudt, Melissa A Leisner, Jonathan Plitnick, Navjot Singh, John Kelly, Erasmus Schneider, Erica Lasek-Nesselquist |
| EPI_ISL_1016400, EPI_ISL_1016401                                                                                                                                                                                                                                                                                                                   | New York Presbyterian Hospital            | Wadsworth Center, New York State Department of Health | Kirsten St. George, Daryl M. Lamson, Alexis Russel, Matthew Shudt, Melissa A Leisner, Jonathan Plitnick, Navjot Singh, John Kelly, Erasmus Schneider, Erica Lasek-Nesselquist |
| EPI_ISL_1016413                                                                                                                                                                                                                                                                                                                                    | NORTHWELL HEALTH LABORATORIES             | Wadsworth Center, New York State Department of Health | Kirsten St. George, Daryl M. Lamson, Alexis Russel, Matthew Shudt, Melissa A Leisner, Jonathan Plitnick, Navjot Singh, John Kelly, Erasmus Schneider, Erica Lasek-Nesselquist |
| EPI_ISL_1016422, EPI_ISL_1016442                                                                                                                                                                                                                                                                                                                   | URMC LABS                                 | Wadsworth Center, New York State Department of Health | Kirsten St. George, Daryl M. Lamson, Alexis Russel, Matthew Shudt, Melissa A Leisner, Jonathan Plitnick, Navjot Singh, John Kelly, Erasmus Schneider, Erica Lasek-Nesselquist |
| EPI_ISL_1016458                                                                                                                                                                                                                                                                                                                                    | NORTHWELL HEALTH LABORATORIES             | Wadsworth Center, New York State Department of Health | Kirsten St. George, Daryl M. Lamson, Alexis Russel, Matthew Shudt, Melissa A Leisner, Jonathan Plitnick, Navjot Singh, John Kelly, Erasmus Schneider, Erica Lasek-Nesselquist |

|                                                                                                                                                                                                                                                                                                                  |                                                                                                   |                                                                                                                                                                                                                            |                                                                                                                                                                                                                                                                                                                                                                                              |                                                                                                                                                                               |
|------------------------------------------------------------------------------------------------------------------------------------------------------------------------------------------------------------------------------------------------------------------------------------------------------------------|---------------------------------------------------------------------------------------------------|----------------------------------------------------------------------------------------------------------------------------------------------------------------------------------------------------------------------------|----------------------------------------------------------------------------------------------------------------------------------------------------------------------------------------------------------------------------------------------------------------------------------------------------------------------------------------------------------------------------------------------|-------------------------------------------------------------------------------------------------------------------------------------------------------------------------------|
| EPI_ISL_1016463                                                                                                                                                                                                                                                                                                  | STONY BROOK UNIVERSITY HOSPITAL                                                                   | Wadsworth Center, New York State Department of Health                                                                                                                                                                      | Kirsten St. George, Daryl M. Lamson, Alexis Russel, Matthew Shudt, Melissa A Leisner, Jonathan Plitnick, Navjot Singh, John Kelly, Erasmus Schneider, Erica Lasek-Nesselquist                                                                                                                                                                                                                |                                                                                                                                                                               |
| EPI_ISL_1016471, EPI_ISL_1016474                                                                                                                                                                                                                                                                                 | ALBANY MEDICAL CENTER HOSPITAL CLINICAL LABORATORIES                                              | Wadsworth Center, New York State Department of Health                                                                                                                                                                      | Kirsten St. George, Daryl M. Lamson, Alexis Russel, Matthew Shudt, Melissa A Leisner, Jonathan Plitnick, Navjot Singh, John Kelly, Erasmus Schneider, Erica Lasek-Nesselquist                                                                                                                                                                                                                |                                                                                                                                                                               |
| EPI_ISL_1016476                                                                                                                                                                                                                                                                                                  | STONY BROOK UNIVERSITY HOSPITAL                                                                   | Wadsworth Center, New York State Department of Health                                                                                                                                                                      | Kirsten St. George, Daryl M. Lamson, Alexis Russel, Matthew Shudt, Melissa A Leisner, Jonathan Plitnick, Navjot Singh, John Kelly, Erasmus Schneider, Erica Lasek-Nesselquist                                                                                                                                                                                                                |                                                                                                                                                                               |
| EPI_ISL_1020488, EPI_ISL_1020489, EPI_ISL_1020490, EPI_ISL_1020493, EPI_ISL_1020496, EPI_ISL_1020506, EPI_ISL_1020508, EPI_ISL_1020509, EPI_ISL_1020510, EPI_ISL_1020512, EPI_ISL_1020517, EPI_ISL_1020526, EPI_ISL_1020536, EPI_ISL_1020538, EPI_ISL_1020540, EPI_ISL_1020543, EPI_ISL_1020545, EPI_ISL_1020546 | see above                                                                                         | Columbia University Irving Medical Center                                                                                                                                                                                  | Wadsworth Center, New York State Department of Health                                                                                                                                                                                                                                                                                                                                        | Kirsten St. George, Daryl M. Lamson, Alexis Russel, Matthew Shudt, Melissa A Leisner, Jonathan Plitnick, Navjot Singh, John Kelly, Erasmus Schneider, Erica Lasek-Nesselquist |
| EPI_ISL_402119                                                                                                                                                                                                                                                                                                   | National Institute for Viral Disease Control and Prevention, China CDC                            | National Institute for Viral Disease Control and Prevention, China CDC                                                                                                                                                     | Wenjie TanXiang ZhaoWenling WangXuejun MaYongzhong JiangRoujian Lu, Ji Wang, Weimin ZhouPeihua NiuPeipei LiuFaxian ZhanWeifeng ShiBaoying HuangJun LiuLi ZhaoYao MengXiaozhou HeFei YeNa ZhuYang LiJing ChenWenbo XuGeorge F. GaoGuizhen Wu                                                                                                                                                  |                                                                                                                                                                               |
| EPI_ISL_403929                                                                                                                                                                                                                                                                                                   | Institute of Pathogen Biology, Chinese Academy of Medical Sciences & Peking Union Medical College | Institute of Pathogen Biology, Chinese Academy of Medical Sciences & Peking Union Medical College                                                                                                                          | Lili Ren, Jianwei Wang, Qi Jin, Zichun Xiang, Zhiqiang Wu, Chao Wu, Yiwei Liu                                                                                                                                                                                                                                                                                                                |                                                                                                                                                                               |
| EPI_ISL_403962, EPI_ISL_403963                                                                                                                                                                                                                                                                                   | Bamrasnaradura Hospital                                                                           | 1. Department of Medical Sciences, Ministry of Public Health, Thailand 2. Thai Red Cross Emerging Infectious Diseases - Health Science Centre 3. Department of Disease Control, Ministry of Public Health, Thailand        | Pilailuk,Okada; Siripaporn.Phuypun; Thanutsapa.Thanadachakul; Supaporn,Wacharapluesadee; Sittiporn,Parmmen; Warawan,Wongboot; Sunthareeya,Waicharoen; Rome,Buathong; Malinee,Chittaganpitch; Nanthawan,Mekha                                                                                                                                                                                 |                                                                                                                                                                               |
| EPI_ISL_404228                                                                                                                                                                                                                                                                                                   | Zhejiang Provincial Center for Disease Control and Prevention                                     | Department of Microbiology, Zhejiang Provincial Center for Disease Control and Prevention                                                                                                                                  | YanJun Zhang, Yin Chen, Haiyan Mao, Junhang Pan, Xiuyu Lou, Yiyu Lu, Juying Yan, Hanping Zhu, Jian Gao, Yan Feng, Yi Sun, Hao Yan, Zhen Li, Yisheng Sun, Liming Gong, Qiong Ge, Wen Shi, Xinying Wang, Wenwu Yao, Zhangnv Yang, Fang Xu, Chen Chen, Entu Chen, Zhen Wang, Zhiping Chen, Jianmin Jiang, Chonggao Hu                                                                           |                                                                                                                                                                               |
| EPI_ISL_404253                                                                                                                                                                                                                                                                                                   | IL Department of Public Health Chicago Laboratory                                                 | Pathogen Discovery, Respiratory Viruses Branch, Division of Viral Diseases, Centers for Diseases Control and Prevention                                                                                                    | Ying Tao, Krista Queen, Clinton R. Paden, Jing Zhang, Yan Li, Anna Uehara, Xiaoyan Lu, Brian Lynch, Senthil Kumar K. Sakthivel, Brett L. Whitaker, Shifaq Kamili, Lijuan Wang, Janna' R. Murray, Susan I. Gerber, Stephen Lindstrom, Suxiang Tong                                                                                                                                            |                                                                                                                                                                               |
| EPI_ISL_404895                                                                                                                                                                                                                                                                                                   | Providence Regional Medical Center                                                                | Division of Viral Diseases, Centers for Disease Control and Prevention                                                                                                                                                     | Queen,K., Tao,Y., Li,Y., Paden,C.R., Lu,X., Zhang,J., Gerber,S.I., Lindstrom,S., Tong,S.                                                                                                                                                                                                                                                                                                     |                                                                                                                                                                               |
| EPI_ISL_406034, EPI_ISL_406036                                                                                                                                                                                                                                                                                   | California Department of Public Health                                                            | Pathogen Discovery, Respiratory Viruses Branch, Division of Viral Diseases, Centers for Diseases Control and Prevention                                                                                                    | Anna Uehara, Krista Queen, Ying Tao, Yan Li, Clinton R. Paden, Jing Zhang, Xiaoyan Lu, Brian Lynch, Senthil Kumar K. Sakthivel, Brett L. Whitaker, Shifaq Kamili, Lijuan Wang, Janna' R. Murray, Susan I. Gerber, Stephen Lindstrom, Suxiang Tong                                                                                                                                            |                                                                                                                                                                               |
| EPI_ISL_406223                                                                                                                                                                                                                                                                                                   | Arizona Department of Health Services                                                             | Pathogen Discovery, Respiratory Viruses Branch, Division of Viral Diseases, Centers for Disease Control and Prevention                                                                                                     | Ying Tao, Clinton R. Paden, Krista Queen, Anna Uehara, Yan Li, Jing Zhang, Xiaoyan Lu, Brian Lynch, Senthil Kumar K. Sakthivel, Brett L. Whitaker, Shifaq Kamili, Lijuan Wang, Janna' R. Murray, Susan I. Gerber, Stephen Lindstrom, Suxiang Tong                                                                                                                                            |                                                                                                                                                                               |
| EPI_ISL_406596, EPI_ISL_406597                                                                                                                                                                                                                                                                                   | Department of Infectious and Tropical Diseases, Bichat Claude Bernard Hospital, Paris             | National Reference Center for Viruses of Respiratory Infections, Institut Pasteur, Paris                                                                                                                                   | Mélanie Albert, Marion Barbet, Sylvie Behillil, Méline Bizard, Angela Brisebarre, Flora Donati, Vincent Enouf, Maud Vanpeene, Sylvie van der Werf, Yazdan Yazdanpanah, Xavier Lescure.                                                                                                                                                                                                       |                                                                                                                                                                               |
| EPI_ISL_406798                                                                                                                                                                                                                                                                                                   | General Hospital of Central Theater Command of People's Liberation Army of China                  | BGI & Institute of Microbiology, Chinese Academy of Sciences & Shandong First Medical University & Shandong Academy of Medical Sciences & General Hospital of Central Theater Command of People's Liberation Army of China | Weijun Chen, Yuhai Bi, Weifeng Shi and Zhenhong Hu                                                                                                                                                                                                                                                                                                                                           |                                                                                                                                                                               |
| EPI_ISL_407071                                                                                                                                                                                                                                                                                                   | Respiratory Virus Unit, Microbiology Services Colindale, Public Health England                    | Respiratory Virus Unit, Microbiology Services Colindale, Public Health England                                                                                                                                             | Monica Galiano, Shahjahan Miah, Richard Myers, Angie Lackenby, Omolola Akinbami, Tiina Talts, Leena Bhaw, Kirstin Edwards, Jonathan Hubb, Joanna Ellis, Maria Zambon                                                                                                                                                                                                                         |                                                                                                                                                                               |
| EPI_ISL_407073                                                                                                                                                                                                                                                                                                   | Respiratory Virus Unit, Microbiology Services Colindale, Public Health England                    | Respiratory Virus Unit, Microbiology Services Colindale, Public Health England                                                                                                                                             | Monica Galiano, Shahjahan Miah, Richard Myers, Angie Lackenby, Omolola Akinbami, Tiina Talts, Leena Bhaw, Kirstin Edwards, Jonathan Hubb, Joanna Ellis, Maria Zambon.                                                                                                                                                                                                                        |                                                                                                                                                                               |
| EPI_ISL_407079                                                                                                                                                                                                                                                                                                   | Lapland Central Hospital                                                                          | Department of Virology, University of Helsinki and Helsinki University Hospital, Helsinki, Finland                                                                                                                         | Teemu Smura, Suvi Kuivainen, Hannimari Kallio-Kokko, Olli Vapalahti                                                                                                                                                                                                                                                                                                                          |                                                                                                                                                                               |
| EPI_ISL_407893                                                                                                                                                                                                                                                                                                   | Centre for Infectious Diseases and Microbiology Laboratory Services                               | NSW Health Pathology - Institute of Clinical Pathology and Medical Research; Westmead Hospital; University of Sydney                                                                                                       | Eden J-S, Carter I, Rahman H, Holmes EC, Rockett R, O'Sullivan MV, Sintchenko V, Chen SC, Maddocks S, Kok J and Dwyer DE for the 2019-nCoV Study Group                                                                                                                                                                                                                                       |                                                                                                                                                                               |
| EPI_ISL_407894, EPI_ISL_407896                                                                                                                                                                                                                                                                                   | Pathology Queensland                                                                              | Public Health Virology Laboratory                                                                                                                                                                                          | Ben Huang, Alyssa Pyke, Amanda De Jong, Andrew Van Den Hurk, Carmel Taylor, David Warrilow, Doris Genge, Elisabeth Gamez, Glen Hewitson, Ian Maxwell Mackay, Inga Sultana, Jamie McMahon, Jean Barcelon, Judy Northill, Mitchell Finger, Natalie Simpson, Neelima Nair, Peter Burtonclay, Peter Moore, Sarah Wheatley, Sean Moody, Sonja Hall-Mendelin, Timothy Gardam, and Frederick Moore. |                                                                                                                                                                               |
| EPI_ISL_408008                                                                                                                                                                                                                                                                                                   | California Department of Health                                                                   | Pathogen Discovery, Respiratory Viruses Branch, Division of Viral Diseases, Centers for Disease Control and Prevention                                                                                                     | Krista Queen, Jing Zhang, Yan Li, Ying Tao, Anna Uehara, Clinton Paden, Xiaoyan Lu, Brian Lynch, Senthil Kumar K. Sakthivel, Brett L. Whitaker, Shifaq Kamili, Lijuan Wang, Janna' R. Murray, Susan I. Gerber, Stephen Lindstrom, Suxiang Tong                                                                                                                                               |                                                                                                                                                                               |
| EPI_ISL_408009                                                                                                                                                                                                                                                                                                   | California Department of Health                                                                   | Pathogen Discovery, Respiratory Viruses Branch, Division of Viral Diseases, Centers for Diseases Control and Prevention                                                                                                    | Krista Queen, Jing Zhang, Yan Li, Ying Tao, Anna Uehara, Clinton Paden, Xiaoyan Lu, Brian Lynch, Senthil Kumar K. Sakthivel, Brett L. Whitaker, Shifaq Kamili, Lijuan Wang, Janna' R. Murray, Susan I. Gerber, Stephen Lindstrom, Suxiang Tong                                                                                                                                               |                                                                                                                                                                               |
| EPI_ISL_408431                                                                                                                                                                                                                                                                                                   | Sorbonne Université, Inserm et Assistance Publique-Hôpitaux de Paris (Pitié Salpêtrière)          | National Reference Center for Viruses of Respiratory Infections, Institut Pasteur, Paris                                                                                                                                   | Mélanie Albert, Marion Barbet, Sylvie Behillil, Méline Bizard, Angela Brisebarre, Flora Donati, Vincent Enouf, Maud Vanpeene, Sylvie van der Werf, Sonia Burrel, Anne-Geneviève Marcelin, Vincent Calvez, David Boutolleau, Elise Klément, Valérie Pouchere, Eric Caumes.                                                                                                                    |                                                                                                                                                                               |
| EPI_ISL_408479                                                                                                                                                                                                                                                                                                   | Zhongxian Center for Disease Control and Prevention                                               | Chongqing Municipal Center for Disease Control and Prevention                                                                                                                                                              | Ye Sheng, Tang Yun, Ling Hua, Zhang Hong, Yu zhen,Chen Shuang,Tan ZhangPing, Su Kun, Li Qin, Tang Wenge, Rong Rong                                                                                                                                                                                                                                                                           |                                                                                                                                                                               |
| EPI_ISL_408670                                                                                                                                                                                                                                                                                                   | Wisconsin Department of Health Services                                                           | Pathogen Discovery, Respiratory Viruses Branch, Division of Viral Diseases, Centers for Diseases Control and Prevention                                                                                                    | Jing Zhang, Anna Uehara, Krista Queen, Yan Li, Ying Tao, Clinton R. Paden, Xiaoyan Lu, Brian Lynch, Senthil Kumar K. Sakthivel, Brett L. Whitaker, Shifaq Kamili, Lijuan Wang, Janna' R. Murray, Susan I. Gerber, Stephen Lindstrom, Suxiang Tong                                                                                                                                            |                                                                                                                                                                               |
| EPI_ISL_409067                                                                                                                                                                                                                                                                                                   | Massachusetts Department of Public Health                                                         | Pathogen Discovery, Respiratory Viruses Branch, Division of Viral Diseases, Centers for Diseases Control and Prevention                                                                                                    | Clinton R. Paden, Jing Zhang, Krista Queen, Yan Li, Ying Tao, Anna Uehara, Xiaoyan Lu, Brian Lynch, Senthil Kumar K. Sakthivel, Brett L. Whitaker, Shifaq Kamili, Lijuan Wang, Janna' R. Murray, Susan I. Gerber, Stephen Lindstrom, Suxiang Tong                                                                                                                                            |                                                                                                                                                                               |
| EPI_ISL_410044                                                                                                                                                                                                                                                                                                   | California Department of Public Health                                                            | Pathogen Discovery, Respiratory Viruses Branch, Division of Viral Diseases, Centers for Diseases Control and Prevention                                                                                                    | Jing Zhang, Krista Queen, Yan Li, Ying Tao, Anna Uehara, Clinton R. Paden, Xiaoyan Lu, Brian Lynch, Senthil Kumar K. Sakthivel, Brett L. Whitaker, Shifaq Kamili, Lijuan Wang, Janna' R. Murray, Susan I. Gerber, Stephen Lindstrom, Suxiang Tong                                                                                                                                            |                                                                                                                                                                               |
| EPI_ISL_410045                                                                                                                                                                                                                                                                                                   | IL Department of Public Health Chicago Laboratory                                                 | Pathogen Discovery, Respiratory Viruses Branch, Division of Viral Diseases, Centers for Diseases Control and Prevention                                                                                                    | Yan Li, Jing Zhang, Krista Queen, Ying Tao, Anna Uehara, Clinton R. Paden, Xiaoyan Lu, Brian Lynch, Senthil Kumar K. Sakthivel, Brett L. Whitaker, Shifaq Kamili, Lijuan Wang, Janna' R. Murray, Susan I. Gerber, Stephen Lindstrom, Suxiang Tong                                                                                                                                            |                                                                                                                                                                               |
| EPI_ISL_410532                                                                                                                                                                                                                                                                                                   | Dept. of Pathology, National Institute of Infectious Diseases                                     | Pathogen Genomics Center, National Institute of Infectious Diseases                                                                                                                                                        | Tsuyoshi Sekizuka, Harutaka Katano, Shutoku Matsuyama, Naganori Nao, Kazuya Shirato, Motoi Suzuki, Hideki Hasegawa, Takaji Wakita, Makoto Takeda, Tadaki Suzuki, Makoto Kuroda                                                                                                                                                                                                               |                                                                                                                                                                               |
| EPI_ISL_410545                                                                                                                                                                                                                                                                                                   | INMI Lazzaro Spallanzani IRCCS                                                                    | Laboratory of Virology, INMI Lazzaro Spallanzani IRCCS                                                                                                                                                                     | Maria R. Capobianchi, Cesare E. M. Gruber, Martina Rueca, Barbara Bartolini, Francesco Messina, Emanuela Giombini, Francesca Colavita, Concetta Castilletti, Eleonora Lalle, Fabrizio Carletti, Emanuele Nicastri, Giuseppe Ippolito.                                                                                                                                                        |                                                                                                                                                                               |
| EPI_ISL_410546                                                                                                                                                                                                                                                                                                   | INMI Lazzaro Spallanzani IRCCS                                                                    | Laboratory of Virology, INMI Lazzaro Spallanzani IRCCS                                                                                                                                                                     | Maria R. Capobianchi, Cesare E. M. Gruber, Martina Rueca, Fabrizio Carletti, Barbara Bartolini, Francesco Messina, Emanuela Giombini, Francesca Colavita, Concetta Castilletti, Eleonora Lalle, Emanuele Nicastri, Giuseppe Ippolito.                                                                                                                                                        |                                                                                                                                                                               |
| EPI_ISL_410717, EPI_ISL_410718                                                                                                                                                                                                                                                                                   | Pathology Queensland                                                                              | Public Health Virology Laboratory                                                                                                                                                                                          | Ben Huang, Alyssa Pyke, Amanda De Jong, Andrew Van Den Hurk, Carmel Taylor, David Warrilow, Doris Genge, Elisabeth Gamez, Glen Hewitson, Ian Maxwell Mackay, Inga Sultana, Jamie McMahon, Jean Barcelon, Judy Northill, Mitchell Finger, Natalie Simpson, Neelima Nair, Peter Burtonclay, Peter Moore, Sarah Wheatley, Sean Moody, Sonja Hall-Mendelin, Timothy Gardam, and Frederick Moore. |                                                                                                                                                                               |
| EPI_ISL_410720                                                                                                                                                                                                                                                                                                   | Department of Infectious and Tropical Diseases, Bichat                                            | National Reference Center for Viruses of Respiratory                                                                                                                                                                       | Mélanie Albert, Marion Barbet, Sylvie Behillil, Méline Bizard, Angela Brisebarre, Flora Donati, Vincent Enouf, Maud Vanpeene, Sylvie van der Werf, Yazdan                                                                                                                                                                                                                                    |                                                                                                                                                                               |

|                                |                                                                                                                                                                                                                                |                                                                                                                                                                                                                                |                                                                                                                                                                                                                                                                                                                                                                                                                                                                                                                                                                                                                                                                                                                                                                                           |
|--------------------------------|--------------------------------------------------------------------------------------------------------------------------------------------------------------------------------------------------------------------------------|--------------------------------------------------------------------------------------------------------------------------------------------------------------------------------------------------------------------------------|-------------------------------------------------------------------------------------------------------------------------------------------------------------------------------------------------------------------------------------------------------------------------------------------------------------------------------------------------------------------------------------------------------------------------------------------------------------------------------------------------------------------------------------------------------------------------------------------------------------------------------------------------------------------------------------------------------------------------------------------------------------------------------------------|
| EPI_ISL_411219, EPI_ISL_411220 | Claude Bernard Hospital, Paris<br>Department of Infectious and Tropical Diseases, Bichat Claude Bernard Hospital, Paris                                                                                                        | Infections, Institut Pasteur, Paris<br>Laboratoire Virpath, CIRI U111, UCBL1, INSERM, CNRS, ENS Lyon                                                                                                                           | Yazdanpanah, Xavier Lescure.<br>Olivier Terrier, Aurélien Traversier, Julien Fouret, Yazdan Yazdanpanah, Xavier Lescure, Alexandre Gaymard, Bruno Lina, Manuel Rosa-Calatrava                                                                                                                                                                                                                                                                                                                                                                                                                                                                                                                                                                                                             |
| EPI_ISL_411915                 | Laboratory Medicine                                                                                                                                                                                                            | Department of Laboratory Medicine, Lin-Kou Chang Gung Memorial Hospital, Taoyuan, Taiwan.                                                                                                                                      | Kuo-Chien Tsao, Yu-Nong Gong, Shu-Li Yang, Yi-Chun Li, Chung-Guei Huang, Yhu-Chering Huang, Shin-Ru Shih                                                                                                                                                                                                                                                                                                                                                                                                                                                                                                                                                                                                                                                                                  |
| EPI_ISL_412872                 | Division of Viral Diseases, Center for Laboratory Control of Infectious Diseases, Korea Centers for Diseases Control and Prevention                                                                                            | Division of Viral Diseases, Center for Laboratory Control of Infectious Diseases, Korea Centers for Diseases Control and Prevention                                                                                            | Jeong-Min Kim, Yoon-Seok Chung, Namjoo Lee, Mi-Seon Kim, Sang Hee Woo, Hye-Jun Jo, Sehee Park, Heui Man Kim, Myung Guk Han                                                                                                                                                                                                                                                                                                                                                                                                                                                                                                                                                                                                                                                                |
| EPI_ISL_412972                 | Instituto Nacional de Enfermedades Respiratorias                                                                                                                                                                               | Instituto de Diagnostico y Referencia Epidemiologicos (INDRE)                                                                                                                                                                  | Ramirez-Gonzalez Ernesto, Garcés-Ayala Fabiola, Araiza-Rodríguez Adnan, Mendieta-Condado Edgar, Rodríguez-Maldonado Abril, Wong-Arambula Claudia, Vazquez-Perez Joel, Martínez Arturo, Boukadida Celia, Munoz-Medina Esteban, Sanchez Alejandro, Isa Pavel, Taboada Blanca, Lopez Susana, Arias Carlos, Barrera-Badillo Gisela, Hernandez-Rivas Lucia, Lopez-Martinez Irma                                                                                                                                                                                                                                                                                                                                                                                                                |
| EPI_ISL_412973                 | Department of Infectious Diseases, Istituto Superiore di Sanità, Roma, Italy                                                                                                                                                   | Virology Laboratory, Scientific Department, Army Medical Center                                                                                                                                                                | Paola Stefanelli, Stefano Fiore, Antonella Marchi, Eleonora Benedetti, Concetta Fabiani, Giovanni Faggioli, Antonella Fortunato, Riccardo De Santis, Silvia Fillo, Anna Anselmo, Andrea Ciammaruconi, Stefano Palomba, Florio Lista                                                                                                                                                                                                                                                                                                                                                                                                                                                                                                                                                       |
| EPI_ISL_412974                 | Department of Infectious Diseases, Istituto Superiore di Sanità, Rome, Italy                                                                                                                                                   | Virology Laboratory, Scientific Department, Army Medical Center                                                                                                                                                                | Paola Stefanelli, Stefano Fiore, Antonella Marchi, Eleonora Benedetti, Concetta Fabiani, Giovanni Faggioli, Antonella Fortunato, Silvia Fillo, Riccardo De Santis, Andrea Ciammaruconi, Giancarlo Petralito, Filippo Molinari, Florio Lista                                                                                                                                                                                                                                                                                                                                                                                                                                                                                                                                               |
| EPI_ISL_413015                 | Public Health Ontario Laboratory                                                                                                                                                                                               | National Microbiology Laboratory                                                                                                                                                                                               | Shari Tyson, Anna Majer, Erika Landry, Morag Graham, Grace Seo, Philip Mabon, Natalie Knox, Adrian Zetner, Samira Mubareka, Rob Kozak, Jocelyne Lew, Darryl Falzarano, Gerdts Volker, Jonathan Gubbay, Stephanie Booth, Guillaume Poliquin, Tom Graefenhan, Matthew Gilmour, Nathalie Bastien, Yan Li, Timothy Booth                                                                                                                                                                                                                                                                                                                                                                                                                                                                      |
| EPI_ISL_413016                 | Hospital Israelita Albert Einstein                                                                                                                                                                                             | Instituto Adolfo Lutz, Interdisciplinary Procedures Center, Strategic Laboratory                                                                                                                                               | Jaqueline Goes de Jesus, Claudio Tavares Sacchi, Fabiana Cristina Pereira dos Santos, Ingra Morales Claro, Flávia Cristina da Silva Sales, Claudia Regina Gonçalves, Joshua Quick, Maria do Carmo Sampaio Tavares Timenetsky, Nicholas James Loman, Andrew Rambaut, Ester Cerdeira Sabino, Nuno Rodrigues Faria                                                                                                                                                                                                                                                                                                                                                                                                                                                                           |
| EPI_ISL_413457                 | Washington State Public Health Lab                                                                                                                                                                                             | UW Virology Lab                                                                                                                                                                                                                | Pavitra Roychoudhury, Arun Nalla, Hong Xie, Keith Jerome, Alexander Greninger                                                                                                                                                                                                                                                                                                                                                                                                                                                                                                                                                                                                                                                                                                             |
| EPI_ISL_414011                 | Respiratory Virus Unit, Microbiology Services Colindale, Public Health England                                                                                                                                                 | Respiratory Virus Unit, Microbiology Services Colindale, Public Health England                                                                                                                                                 | Monica Galiano, Shahjahan Miah, Angie Lackenby, Omolola Akinbami, Tiina Talts, Leena Bhaw, Richard Myers, Steven Platt, Kirstin Edwards, Jonathan Hubb, Joanna Ellis, Maria Zambon                                                                                                                                                                                                                                                                                                                                                                                                                                                                                                                                                                                                        |
| EPI_ISL_414015                 | Hospital São Joaquim Beneficencia Portuguesa                                                                                                                                                                                   | Instituto Adolfo Lutz, Interdisciplinary Procedures Center, Strategic Laboratory                                                                                                                                               | Claudio Tavares Sacchi, Claudia Regina Gonçalves, Simone Guadagnucci Morillo, Carlos Henrique Camargo, Maria do Carmo Sampaio Tavares Timenetsky, Fabiana Cristina Pereira dos Santos Terezinha Maria de Paiva, Ester Cerdeira Sabino                                                                                                                                                                                                                                                                                                                                                                                                                                                                                                                                                     |
| EPI_ISL_414016                 | Hospital São Joaquim Beneficencia Portuguesa                                                                                                                                                                                   | Instituto Adolfo Lutz, Interdisciplinary Procedures Center, Strategic Laboratory                                                                                                                                               | Claudio Tavares Sacchi, Claudia Regina Gonçalves, Audrey Cilli, Carlos Henrique Camargo, Maria do Carmo Sampaio Tavares Timenetsky, Daniela Bernardes Borges da Silva, Terezinha Maria de Paiva, Ester Cerdeira Sabino                                                                                                                                                                                                                                                                                                                                                                                                                                                                                                                                                                    |
| EPI_ISL_414019, EPI_ISL_414020 | Laboratoire de Virologie, HUG                                                                                                                                                                                                  | Swiss National Reference Centre for Influenza                                                                                                                                                                                  | LAUBSCHER Florian et al.                                                                                                                                                                                                                                                                                                                                                                                                                                                                                                                                                                                                                                                                                                                                                                  |
| EPI_ISL_414626                 | unknown                                                                                                                                                                                                                        | National Reference Center for Viruses of Respiratory Infections, Institut Pasteur, Paris                                                                                                                                       | Mélnie Albert, Marion Barbet, Sylvie Behillil, Méline Bizard, Angela Brisebarre, Flora Donati Vincent Enouf, Maud Vanpeene, Sylvie van der Werf                                                                                                                                                                                                                                                                                                                                                                                                                                                                                                                                                                                                                                           |
| EPI_ISL_414647                 | Viral Respiratory Lab, National Institute for Biomedical Research (INRB)                                                                                                                                                       | Pathogen Sequencing Lab, National Institute for Biomedical Research (INRB)                                                                                                                                                     | Placide Mbala-Kingebeni, Edith Nkwembe, Eddy Kinganda-Lusamaki, Amuri Aziza, Catherine Pratt, Matthias Pauthner, Josh Quick, Allison Black, James Hadfield, Trevor Bedford, Ian Goodfellow, Nick Loman, Kristian Andersen, Michael Wiley, Steve Ahuka-Mundeke, Jean-Jacques Muyembe Tamfum                                                                                                                                                                                                                                                                                                                                                                                                                                                                                                |
| EPI_ISL_415711                 | State Key Laboratory for Diagnosis and Treatment of Infectious Diseases, National Clinical Research Center for Infectious Diseases, First Affiliated Hospital, Zhejiang University School of Medicine, Hangzhou, China. 310003 | State Key Laboratory for Diagnosis and Treatment of Infectious Diseases, National Clinical Research Center for Infectious Diseases, First Affiliated Hospital, Zhejiang University School of Medicine, Hangzhou, China. 310003 | Hangping Yao, Nanping Wu, Chao Jiang, Xiangyun Lu, Linfang Cheng, Fumin Liu, Zhigang Wu, Haibo Wu, Changzhong Jin, Min Zheng, Lanjuan Li                                                                                                                                                                                                                                                                                                                                                                                                                                                                                                                                                                                                                                                  |
| EPI_ISL_416415                 | Victorian Infectious Diseases Reference Laboratory (VIDRL)                                                                                                                                                                     | Victorian Infectious Diseases Reference Laboratory and Microbiological Diagnostic Unit Public Health Laboratory, Doherty Institute                                                                                             | Caly L., Seemann T., Schultz M., Druce J., Tairaoa, G.                                                                                                                                                                                                                                                                                                                                                                                                                                                                                                                                                                                                                                                                                                                                    |
| EPI_ISL_416465                 | Seattle Flu Study                                                                                                                                                                                                              | Seattle Flu Study                                                                                                                                                                                                              | Chu et al                                                                                                                                                                                                                                                                                                                                                                                                                                                                                                                                                                                                                                                                                                                                                                                 |
| EPI_ISL_416484                 | Servicio de Microbiología. Consorcio Hospital General Universitario de Valencia                                                                                                                                                | Sequencing and Bioinformatics Service and Molecular Epidemiology Research Group. FISABIO-Public Health                                                                                                                         | Maria Dolores Ocete, Concepcion Gimeno, Giuseppe D'Auria, Griselda De Marco, Neris Garcia-Gonzalez, Maria Alma Bracho, Fernando Gonzalez-Candelas                                                                                                                                                                                                                                                                                                                                                                                                                                                                                                                                                                                                                                         |
| EPI_ISL_416742                 | NRL for Influenza, Centrum Epidemiology and Microbiology of National Institute of Public Health, Czech Republic                                                                                                                | Charite Universitaetsmedizin Berlin, Institute of Virology                                                                                                                                                                     | Victor M Corman, Julia Schneider, Jorn Beheim-Schwarzbach, Talitha Veith, Barbara Muehleemann, Terry Jones, Akexander Nagy, Jaromira Vecerova, Dusan Trnka, Ludmila Novakova, Helena Jirincova, Christian Drosten                                                                                                                                                                                                                                                                                                                                                                                                                                                                                                                                                                         |
| EPI_ISL_417098, EPI_ISL_417151 | Washington State Department of Health                                                                                                                                                                                          | Seattle Flu Study                                                                                                                                                                                                              | Chu et al                                                                                                                                                                                                                                                                                                                                                                                                                                                                                                                                                                                                                                                                                                                                                                                 |
| EPI_ISL_417447                 | Laboratory of Infectious Diseases, Department of Biomedical and Clinical Sciences L. Sacco, University of Milan                                                                                                                | Laboratory of Infectious Diseases, Department of Biomedical and Clinical Sciences L. Sacco, University of Milan                                                                                                                | Gianguglielmo Zehender, Alessia Lai, Annalisa Bergna, Luca Meroni, Agostino Riva, Claudia Balotta, Maciej Tarkowski, Arianna Gabrieli, Dario Bernacchia, Stefano Rusconi, Giuliano Rizzardini, Spinello Antinori, Massimo Galli                                                                                                                                                                                                                                                                                                                                                                                                                                                                                                                                                           |
| EPI_ISL_419725                 | Microbiological Diagnostic Unit Public Health Laboratory                                                                                                                                                                       | Microbiological Diagnostic Unit Public Health Laboratory                                                                                                                                                                       | Seemann T., Schultz M., Sait, M., Sherry, N.                                                                                                                                                                                                                                                                                                                                                                                                                                                                                                                                                                                                                                                                                                                                              |
| EPI_ISL_419733, EPI_ISL_419809 | Victorian Infectious Diseases Reference Laboratory (VIDRL)                                                                                                                                                                     | Victorian Infectious Diseases Reference Laboratory and Microbiological Diagnostic Unit Public Health Laboratory, Doherty Institute                                                                                             | Caly L., Seemann T., Sait, M., Schultz M., Druce J., Sherry, N.                                                                                                                                                                                                                                                                                                                                                                                                                                                                                                                                                                                                                                                                                                                           |
| EPI_ISL_420077                 | Institut Pasteur Dakar                                                                                                                                                                                                         | Institut Pasteur de Dakar                                                                                                                                                                                                      | Ndongo Dia, Moussa Moise Diagne, Mamadou Diop, Ousmane Faye, Amadou Alpha Sall                                                                                                                                                                                                                                                                                                                                                                                                                                                                                                                                                                                                                                                                                                            |
| EPI_ISL_420119                 | Servicio de Microbiología. Consorcio Hospital General Universitario de Valencia                                                                                                                                                | Sequencing and Bioinformatics Service and Molecular Epidemiology Research Group. FISABIO-Public Health                                                                                                                         | Paula Ruiz-Hueso, Mariana Reyes-Prieto, Vicente Soriano Chirona, Maria Alma Bracho, Griselda De Marco, Beatriz Beamud, Lidia Ruiz Roldan, Marta Pla Diaz, Neris Garcia-Gonzalez, Loreto Ferrús Abad, Inma Galán Vendrell, Maria Dolores Ocete, Lúcia Martínez-Priego, Concepcion Gimeno, Giuseppe D'Auria, Fernando Gonzalez-Candelas                                                                                                                                                                                                                                                                                                                                                                                                                                                     |
| EPI_ISL_421227                 | Hangzhou Center for Diseases Control and Prevention                                                                                                                                                                            | Hangzhou Center for Diseases Control and Prevention                                                                                                                                                                            | Jun Li, Haoqiu Wang, Lingfeng Mao, Hua Yu, Xinfen Yu, Zhou Sun, Xin Qian, Shuchang Chen, Junfang Chen, Xuchu Wang                                                                                                                                                                                                                                                                                                                                                                                                                                                                                                                                                                                                                                                                         |
| EPI_ISL_422394                 | NMIMR, Department of Virology                                                                                                                                                                                                  | WACCBIP, University of Ghana                                                                                                                                                                                                   | Joyce M. Ngol, Bright Adu, Collins M. Morang'a, Selassie Kumordjie, Miriam Eshun, Linda Boatemaa, Vanessa Magnussen, Erasmus Kotey, Fred Tei-Maya, Dominic S. Y. Amuzu, Peter Quashie, Augustina Arjarquah, Ivy Asante, Evelyn Bonney, George B. Kyei, Kofi Bonney, Abraham Kwabena Anang, Gordon A. Awandare, William Ampofo                                                                                                                                                                                                                                                                                                                                                                                                                                                             |
| EPI_ISL_424585, EPI_ISL_424598 | The National University Hospital of Iceland                                                                                                                                                                                    | deCODE genetics                                                                                                                                                                                                                | Daniel F Gudbjartsson; Agnar Helgason; Hakon Jonsson; Olafur T Magnusson; Pall Melsted; Gudmundur L Norddahl; Jona Saemundsdottir; Asgeir Sigurdsson; Patrick Sulem; Ana B Agustsdottir; Berglind Eiríksdóttir; Run Fridriksdóttir; Elisabet E Gardarsdóttir; Gudmundur Georgsson; Olafía S Gretarsdóttir; Kjartan R Gudmundsson; Thora R Gunnarsdóttir; Arnaldur Gylfason; Hilma Holm; Brynjar O Jónsson; Aslaug Jonasdóttir; Kamilla S Josefsdóttir; Thordur Kristjánsson; Droplaug N Magnúsdóttir; Louise le Roux; Gudrun Sveinbjörnsson; Gardar Sveinbjörnsson; Kristin E Sveinsdóttir; Maney Sveinsdóttir; Emil A Thorarensen; Bjarni Thorbjörnsson; Gisli Masson; Ingileif Jónsdóttir; Alma Moller; Thorolfur Gudnason; Karl G Kristinsson; Unnur Thorsteinsdóttir; Kari Stefánsson |
| EPI_ISL_424909                 | MA State Public Health Laboratory                                                                                                                                                                                              | Pathogen Discovery, Respiratory Viruses Branch, Division of Viral Diseases, Centers for Disease Control and Prevention                                                                                                         | Ying Tao, Clinton R. Paden, Jing Zhang, Krista Queen, Anna Uehara, Yan Li, Haibin Wang, Mary S. Keckler, Alison S. Lauffer Halpin, Christopher A. Elkins, Suixiang Tong                                                                                                                                                                                                                                                                                                                                                                                                                                                                                                                                                                                                                   |
| EPI_ISL_425177                 | Public Health Ontario                                                                                                                                                                                                          | Public Health Agency of Canada - National Microbiology Laboratory                                                                                                                                                              | Amrit S. Boese, Nikesh Tailor, Anders Leung, Joshua Quick, Shari Tyson, Morag Graham, Jonathan Audet, Natalie Knox, Darwyn Kobasa                                                                                                                                                                                                                                                                                                                                                                                                                                                                                                                                                                                                                                                         |
| EPI_ISL_425178                 | Servicio de Microbiología. Consorcio Hospital General Universitario de Valencia                                                                                                                                                | Sequencing and Bioinformatics Service and Molecular Epidemiology Research Group. FISABIO-Public Health                                                                                                                         | David Navarro, Maria Alma Bracho, Griselda De Marco, Beatriz Beamud, Lidia Ruiz Roldan, Marta Pla Diaz, Neris Garcia-Gonzalez, Inma Galán Vendrell, Sandra Carbo, Loreto Ferrús Abad, Paula Ruiz-Hueso, Mariana Reyes-Prieto, Vicente Soriano Chirona, Ivan Ansari, Lúcia Martínez-Priego, Giuseppe                                                                                                                                                                                                                                                                                                                                                                                                                                                                                       |

| D'Auria, Fernando Gonzalez-Candelas                                                                                                                                                                                                                            |                                                                                 |                                                                                                                                                                                                 |                                                                                                                                                                                                                                                                                                                                                                                                                                                                                                                          |
|----------------------------------------------------------------------------------------------------------------------------------------------------------------------------------------------------------------------------------------------------------------|---------------------------------------------------------------------------------|-------------------------------------------------------------------------------------------------------------------------------------------------------------------------------------------------|--------------------------------------------------------------------------------------------------------------------------------------------------------------------------------------------------------------------------------------------------------------------------------------------------------------------------------------------------------------------------------------------------------------------------------------------------------------------------------------------------------------------------|
| EPI_ISL_426025, EPI_ISL_426030, EPI_ISL_426031, EPI_ISL_426038, EPI_ISL_426040, EPI_ISL_426294, EPI_ISL_426302, EPI_ISL_426311, EPI_ISL_426314, EPI_ISL_426315, EPI_ISL_426319, EPI_ISL_426320, EPI_ISL_426321, EPI_ISL_426322, EPI_ISL_426326, EPI_ISL_426327 |                                                                                 |                                                                                                                                                                                                 |                                                                                                                                                                                                                                                                                                                                                                                                                                                                                                                          |
| see above                                                                                                                                                                                                                                                      | Wadsworth Center, New York State Department of Health                           | Wadsworth Center, New York State Department of Health                                                                                                                                           | Kirsten St. George, Daryl M. Lamson, Sara Griesemer, Jonathan Pitnick, Navjot Singh, Matthew D. Shudt, Erica Lasek-Nesselquist                                                                                                                                                                                                                                                                                                                                                                                           |
| EPI_ISL_426655, EPI_ISL_426878, EPI_ISL_426977, EPI_ISL_427103, EPI_ISL_427113                                                                                                                                                                                 | Victorian Infectious Diseases Reference Laboratory (VIDRL)                      | Microbiological Diagnostic Unit Public Health Laboratory and Victorian Infectious Diseases Reference Laboratory, Doherty Institute                                                              | Caly L., Seemann T., Sait, M., Schultz M., Druce J., Sherry, N.                                                                                                                                                                                                                                                                                                                                                                                                                                                          |
| EPI_ISL_428291                                                                                                                                                                                                                                                 | University of Wisconsin-Madison AIDS Vaccine Research Laboratories              | University of Wisconsin-Madison AIDS Vaccine Research Laboratories                                                                                                                              | Gage Moreno, Katarina Braun, et al. AIDS Vaccine Research Laboratories                                                                                                                                                                                                                                                                                                                                                                                                                                                   |
| EPI_ISL_429126                                                                                                                                                                                                                                                 | Unilabs Skovde                                                                  | The Public Health Agency of Sweden                                                                                                                                                              | Tobias Kollberg, Helena Enroth, Olov Svartstrom, Maria Lind Karlberg, Anna-Malin Linde, Oskar Karlsson Lindsjo, Anna Risberg, Shaman Muradrasoli, Karin Tegmark-Wisell                                                                                                                                                                                                                                                                                                                                                   |
| EPI_ISL_430541                                                                                                                                                                                                                                                 | Victorian Infectious Diseases Reference Laboratory (VIDRL)                      | Microbiological Diagnostic Unit Public Health Laboratory and Victorian Infectious Diseases Reference Laboratory, The Peter Doherty Institute for Infection and Immunity                         | Caly L., Seemann T., Sait, M., Schultz M., Druce J., Sherry, N.                                                                                                                                                                                                                                                                                                                                                                                                                                                          |
| EPI_ISL_430804                                                                                                                                                                                                                                                 | Laboratorio de Virología del Hospital de Niños Dr. Ricardo Gutierrez            | Área de Secuenciación del Laboratorio de Virología del Hospital de Niños Dr. Ricardo Gutierrez on behalf of 'Proyecto Argentino Interinstitucional de genómica de SARS-CoV-2' (PAIS Consortium) | Nabaes Jodar, MS; Goya, S; Natale, MI; Lusso, S; Gravis, E; Mistchenko, AS; Valinotto, LE; Viegas, M.                                                                                                                                                                                                                                                                                                                                                                                                                    |
| EPI_ISL_430808                                                                                                                                                                                                                                                 | Departamento de Biología y genética molecular, IACA Laboratorios.               | Área de Secuenciación del Laboratorio de Virología del Hospital de Niños Dr. Ricardo Gutierrez on behalf of 'Proyecto Argentino Interinstitucional de genómica de SARS-CoV-2' (PAIS Consortium) | Nabaes Jodar, MS; Goya, S; Natale, MI; Lusso, S; Tittarelli, E; Suárez, A; Masciovecchio MV; Streitenberger ER; Mistchenko, AS; Valinotto, LE; Viegas, M.                                                                                                                                                                                                                                                                                                                                                                |
| EPI_ISL_430961                                                                                                                                                                                                                                                 | UW Virology Lab                                                                 | UW Virology Lab                                                                                                                                                                                 | Pavitra Roychoudhury, Hong Xie, Keith Jerome, Alexander Greninger                                                                                                                                                                                                                                                                                                                                                                                                                                                        |
| EPI_ISL_432216, EPI_ISL_432237                                                                                                                                                                                                                                 | Wales Specialist Virology Centre                                                | Public Health Wales Microbiology Cardiff                                                                                                                                                        | Catherine Moore, Johnathan Evans, Malorie Perry, Simon Cottrell, Alec Birchley, Alexander Adams, Amy Gaskin, Bree Gatica-Wilcox, Jason Coombes, Lauren Gilbert, Lee Graham, Nicole Pacchiarini, Sara Kumziene-Summerhayes, Sarah Taylor, Sophie Jones, Sara Rey, Matthew Bull, Joanne Watkins, Sally Corden, Tom Connor                                                                                                                                                                                                  |
| EPI_ISL_434652                                                                                                                                                                                                                                                 | Ektorps Vardcentral                                                             | The Public Health Agency of Sweden                                                                                                                                                              | Eva Espmark, Oskar Karlsson Lindsjo, Maria Lind Karlberg, Anna-Malin Linde, Olov Svartstrom, Anna Risberg, Theresa Enkirch, Mia Brytting, Karin Tegmark-Wisell                                                                                                                                                                                                                                                                                                                                                           |
| EPI_ISL_434678                                                                                                                                                                                                                                                 | Viral Respiratory Lab, National Institute for Biomedical Research (INRB)        | Pathogen Sequencing Lab, National Institute for Biomedical Research (INRB)                                                                                                                      | Placide Mbala-Kingebeni; Edith Nkwembe; Eddy Kinganda-Lusamaki; Amuri Aziza; Francisca Muyembe Mawete; Catherine Pratt; Matthias Pauthner; Josh Quick; Allison Black; James Hadfield; Trevor Bedford; Ian Goodfellow; Andrew Rambaut; Nick Loman; Kristian Andersen; Michael Wiley; Steve Ahuka-Mundeke; Jean-Jacques Muyembe Tamfum                                                                                                                                                                                     |
| EPI_ISL_435114                                                                                                                                                                                                                                                 | Viral Respiratory Lab, National Institute for Biomedical Research (INRB)        | Pathogen Sequencing Lab, National Institute for Biomedical Research (INRB)                                                                                                                      | Placide Mbala-Kingebeni, Edith Nkwembe, Eddy Kinganda-Lusamaki, Adrienne Amuri Aziza, Francisca Muyembe Mawete, Catherine Pratt, Matthias Pauthner, Josh Quick, Allison Black, James Hadfield, Trevor Bedford, Ian Goodfellow, Andrew Rambaut, Nick Loman, Kristian Andersen, Michael Wiley, Steve Ahuka-Mundeke, Jean-Jacques Muyembe Tamfum                                                                                                                                                                            |
| EPI_ISL_435161                                                                                                                                                                                                                                                 | Viral Respiratory Lab, National Institute for Biomedical Research (INRB)        | Pathogen Sequencing Lab, National Institute for Biomedical Research (INRB)                                                                                                                      | Placide Mbala-Kingebeni, Edith Nkwembe, Eddy Kinganda-Lusamaki, Amuri Aziza, Francisca Muyembe Mawete, Catherine Pratt, Matthias Pauthner, Josh Quick, Allison Black, James Hadfield, Trevor Bedford, Ian Goodfellow, Andrew Rambaut, Nick Loman, Kristian Andersen, Michael Wiley, Steve Ahuka-Mundeke, Jean-Jacques Muyembe Tamfum                                                                                                                                                                                     |
| EPI_ISL_436361                                                                                                                                                                                                                                                 | Servicio de Microbiología. Consorcio Hospital General Universitario de Valencia | Sequencing and Bioinformatics Service and Molecular Epidemiology Research Group. FISABIO-Public Health                                                                                          | Neris Garcia-Gonzalez, Loreto Ferrús Abad, Maria Dolores Ocete, Inma Galán Vendrell, Paula Ruiz-Hueso, Mariana Reyes-Prieto, Vicente Soriano Chirona, Maria Alma Bracho, Griselda De Marco, Beatriz Beamud, Lidia Ruiz Roldan, Marta Pla Diaz, Lúcia Martínez-Priego, Concepcion Gimeno, Giuseppe D'Auria, Fernando Gonzalez-Candelas                                                                                                                                                                                    |
| EPI_ISL_437450                                                                                                                                                                                                                                                 | B.J. Medical College and Civil hospital                                         | Gujarat Biotechnology Research Centre                                                                                                                                                           | Bhavesh Modi, Kairavi Joshi, Gaurishankar Shrimali, Nidhi Sood, Pranay Shah, R D Dixit, Snehal Bagatharia, Kamlesh J Upadhyay, Ramesh Pandit, Tejas Shah, Ankit Hinsu, Pritesh Sabara, Apurvasinh Puvar, Janvi Raval, Monika Gandhi, Pinal Trivedi, Maharshi Pandya, Amit Kanani, Akanksha Verma, Nitin Savaliya, Raghawendra Kumar, Dinesh Kumar, Zuber Saiyed, Dipa Kinariwala, Disha Patel, Binita Aring, Neeta Khandelwal, Geeta Vaghela, Sonia Barve, Armi Chaudhari, Chaitanya Joshi, Madhvi Joshi                 |
| EPI_ISL_437478                                                                                                                                                                                                                                                 | Pathogen Genomics Lab King Abdullah University of Science and Technology(KAUST) | Pathogen Genomics Lab King Abdullah University of Science and Technology(KAUST)                                                                                                                 | Sharif Hala,Raece Naeem,Sara Mfarrej,Arnab Pain                                                                                                                                                                                                                                                                                                                                                                                                                                                                          |
| EPI_ISL_437487, EPI_ISL_437493                                                                                                                                                                                                                                 | Pathogen Genomics Lab King Abdullah University of Science and Technology(KAUST) | Pathogen Genomics Lab King Abdullah University of Science and Technology(KAUST)                                                                                                                 | Sara Mfarrej,Raece Naeem,Sharif Hala,Amit Subudhi,Fathia Rached,Arnab Pain                                                                                                                                                                                                                                                                                                                                                                                                                                               |
| EPI_ISL_437732, EPI_ISL_437750                                                                                                                                                                                                                                 | Pathogen Genomics Lab King Abdullah University of Science and Technology(KAUST) | Pathogen Genomics Lab King Abdullah University of Science and Technology(KAUST)                                                                                                                 | Sharif Hala,Fadwa Alofi,Afrah Alsomali, Asim Khogeer, Sara Mfarrej, Khaled Algithami,Raece Naeem, Amit Kumar Subudhi,Fathia Ben-Rached, Rahul Salunke, Anwar Hashem, Naif Almontashiri, Arnab Pain                                                                                                                                                                                                                                                                                                                       |
| EPI_ISL_438629                                                                                                                                                                                                                                                 | Department of Pathology, University of Cambridge                                | COVID-19 Genomics UK (COG-UK) Consortium                                                                                                                                                        | Luke W Meredith, M. Est@e Trk , Myra Hosmillio, William L. Hamilton, Martin D. Curran, Theresa Feltwell, Grant Hall, Anna Yakovleva, Fahad A Khokhar, Charlotte J. Houldcroft, Laura G Caller, Aminu S. Jahun, Sarah L. Caddy, Ian Goodfellow                                                                                                                                                                                                                                                                            |
| EPI_ISL_444463                                                                                                                                                                                                                                                 | B.J. Medical College and Civil hospital                                         | Gujarat Biotechnology Research Centre                                                                                                                                                           | Apurvasinh Puvar, Janvi Raval, Monika Gandhi, Pinal Trivedi, Maharshi Pandya, Amit Kanani, Akanksha Verma, Nitin Savaliya, Raghawendra Kumar, Dinesh Kumar, Zuber Saiyed, Dipa Kinariwala, Disha Patel, Binita Aring, Neeta Khandelwal, Geeta Vaghela, Sonia Barve, Bhavesh Modi, Kairavi Joshi, Gaurishankar Shrimali, Nidhi Sood, Pranay Shah, R D Dixit, Snehal Bagatharia, Kamlesh J Upadhyay, Ramesh Pandit, Tejas Shah, Ankit Hinsu, Pritesh Sabara, Bhavya Jindal, Chaitanya Joshi, Madhvi Joshi                  |
| EPI_ISL_445366                                                                                                                                                                                                                                                 | HOSPITAL DR. SOTERO DEL RIO                                                     | Instituto de Salud Publica de Chile                                                                                                                                                             | Andrés E Castillo, Bárbara Parra,Paz Tapia, Jaime Lagos, Loredana Arata, Alejandra Acevedo, Winston Andrade, Gabriel Leal, Carolina Tambley, Patricia Bustos, Rodrigo Fasce, Jorge Fernandez                                                                                                                                                                                                                                                                                                                             |
| EPI_ISL_445402                                                                                                                                                                                                                                                 | Wales Specialist Virology Centre                                                | Public Health Wales Microbiology Cardiff                                                                                                                                                        | Catherine Moore, Johnathan Evans, Laura Gifford, Malorie Perry, Simon Cottrell, Alec Birchley, Alexander Adams, Amy Gaskin, Bree Gatica-Wilcox, Jason Coombes, Lauren Gilbert, Lee Graham, Nicole Pacchiarini, Sara Kumziene-Summerhayes, Sarah Taylor, Sophie Jones, Sara Rey, Matthew Bull, Joanne Watkins, Sally Corden, Tom Connor                                                                                                                                                                                   |
| EPI_ISL_447009                                                                                                                                                                                                                                                 | Ramathibodi Hospital                                                            | COVID-19 Network Investigations (CONI) Alliance                                                                                                                                                 | Elizabeth Batty, Wasun Chantratita, Thanat Chookajorn, Stefan Fernandez, Angkana Huang, Anthony R. Jones, Khajohn Joonsalak, Chonticha Klungtong, Theerarat Kochakarn, Namfon Kotanan, Krittikorn Kumpornsri, Wudtichai Manasatienkij, Bhakbhoom Panthan, Ekawat Pasomsub, Kingkan Rakmanee, Insee Sensor, Janjira Thaipadungpanit, Arporn Wangwiwatsin, Treewat Wattananachokchai                                                                                                                                       |
| EPI_ISL_447554                                                                                                                                                                                                                                                 | GMERS Medical College and Hospital, Gandhinagar                                 | Gujarat Biotechnology Research Centre                                                                                                                                                           | Zuber Saiyed, Dipa Kinariwala, Disha Patel, Binita Aring, Neeta Khandelwal, Geeta Vaghela, Sonia Barve, Bhavesh Modi, Kairavi Joshi, Gaurishankar Shrimali, Nidhi Sood, Pranay Shah, R D Dixit, Snehal Bagatharia, Kamlesh J Upadhyay, Ramesh Pandit, Tejas Shah, Ankit Hinsu, Pritesh Sabara, Apurvasinh Puvar, Janvi Raval, Monika Gandhi, Pinal Trivedi, Maharshi Pandya, Amit Kanani, Akanksha Verma, Nitin Savaliya, Raghawendra Kumar, Dinesh Kumar, Sharmistha Majumdar, Chaitanya Joshi, Madhvi Joshi            |
| EPI_ISL_447909, EPI_ISL_447910, EPI_ISL_447914                                                                                                                                                                                                                 | n/a                                                                             | National Institute of Health. Department of medical Sciences, Ministry of Public Health, Thailand                                                                                               | Pilailuk,Okada; Siripapom,Phuyung; Thanutsapa,Thanadachakul; Sittiporn,Parminen;Warawan,Wongboot; Sunthareeya,Waicharoeng; Malinee,Chittaganpitch                                                                                                                                                                                                                                                                                                                                                                        |
| EPI_ISL_450198, EPI_ISL_450200, EPI_ISL_450209                                                                                                                                                                                                                 | Department of Virology                                                          | Department of Virology                                                                                                                                                                          | Boehmer,M.M., Buchholz,U., Corman,V.M., Hoch,M., Katz,K., Marosevic,D.V., Boehm,S., Woudenberg,T., Ackermann,N., Konrad,R., Eberle,U., Treis,B., Dangel,A., Bengs,K., Fingerle,V., Berger,A., Hoermansdorfer,S., Ippisch,S., Wicklein,B., Grahl,A., Poertner,K., Muller,N., Zeitlmann,N., Boender,T.S., Cai,W., Reich,A., an der Heiden,M., Rexroth,U., Hamouda,O., Schneider,J., Veith,T., Muehleemann,B., Woelfel,R., Antwerpen,M., Walter,M., Protzer,U., Liebl,B., Haas,W., Sing,A., Drosten,C., Zapf,A., Jones,T.C. |

|                                                                |                                                                                              |                                                                                                                                                                           |                                                                                                                                                                                                                                                                                                                                                                                                                                                                                                                                                                                                                                                                                                                                                                                                                                                          |
|----------------------------------------------------------------|----------------------------------------------------------------------------------------------|---------------------------------------------------------------------------------------------------------------------------------------------------------------------------|----------------------------------------------------------------------------------------------------------------------------------------------------------------------------------------------------------------------------------------------------------------------------------------------------------------------------------------------------------------------------------------------------------------------------------------------------------------------------------------------------------------------------------------------------------------------------------------------------------------------------------------------------------------------------------------------------------------------------------------------------------------------------------------------------------------------------------------------------------|
| EPI_ISL_450323                                                 | NIV Pune                                                                                     | CSIR-Centre for Cellular and Molecular Biology                                                                                                                            | Dr V A Potdar, Dr ML Choudhary, Dr Priya Abraham, V. Vipat, S. Jadhav, U. Saha, H. Kengle, A. Awhale, A. Jagtap, A. Gondhalikar, V Malik, N Srivastava, S. Digraskar, P. Malsane, S. Hundekar, K. Patel, Yogesh Balakartik, M. Kakade, S. Jadhav, R. Gunjikar, V. Awatde, S. Bhorekar, P. Shinde, S. Salve, B. Minhas S. Bharadwaj, H Kaushal Y. Gurav, S. Tomar, Payel Mukherjee, Sofia Banu, Priya Singh, Dhiviya Vedagiri, Divya Gupta, Vishal Saha, Santosh Kumar Kuncha, Krishnan Harinivas Harshan, Archana Bharadwaj Siva, Karthik Bharadwaj Tallapaka, Shagufta Khan, Lamuk Zaveri, Namami Gaur, Sakshi Shambhavi, Tulasi Nagabandi, Purushotham Vodnala, G. Aditya Kumar, Koushick Sivakumar, Pooja Ramesh Gupta, Rajan Kumar Jha, Shraddha Vijay Lahoti, Deepak Kumar, Devi Prasad Vijayashankara, Disha Nanda, Divya Das, Jotin Gogoi, Manish |
| EPI_ISL_450818                                                 | Aneby VC                                                                                     | The Public Health Agency of Sweden                                                                                                                                        | Ken Granath, Anna-Malin Linde, Maria Lind Karlberg, Oskar Karlsson Lindsjö, Olov Svartstrom, Anna Risberg, Theresa Enkirch, Mia Brytting, Karin Tegmark-Wisell                                                                                                                                                                                                                                                                                                                                                                                                                                                                                                                                                                                                                                                                                           |
| EPI_ISL_451111, EPI_ISL_451113, EPI_ISL_451116                 | SA Pathology                                                                                 | SA Pathology                                                                                                                                                              | Lex Leong, Chuan Kok Lim, Mark Turra, Ivan Bastian, Geoff Higgins                                                                                                                                                                                                                                                                                                                                                                                                                                                                                                                                                                                                                                                                                                                                                                                        |
| EPI_ISL_451302                                                 | Laboratory of Virology, INMI Lazzaro Spallanzani IRCCS                                       | Laboratory of Virology, INMI Lazzaro Spallanzani IRCCS                                                                                                                    | Cesare E.M. Gruber, Martina Rueca, Barbara Bartolini, Francesco Messina, Antonino Di Caro, Maria R. Capobianchi, Giuseppe Ippolito                                                                                                                                                                                                                                                                                                                                                                                                                                                                                                                                                                                                                                                                                                                       |
| EPI_ISL_451306                                                 | Molecular Virology Unit, Fondazione IRCCS Policlinico San Matteo, Pavia                      | Laboratory of Virology, INMI Lazzaro Spallanzani IRCCS                                                                                                                    | Antonio Piralla, Fausto Baldanti, Martina Rueca, Antonino Di Caro, Maria R. Capobianchi, Cesare E.M. Gruber, Barbara Bartolini                                                                                                                                                                                                                                                                                                                                                                                                                                                                                                                                                                                                                                                                                                                           |
| EPI_ISL_452237                                                 | Huddinge VC                                                                                  | The Public Health Agency of Sweden                                                                                                                                        | Anders Johansson, Anna-Malin Linde, Maria Lind Karlberg, Oskar Karlsson Lindsjö, Olov Svartstrom, Anna Risberg, Theresa Enkirch, Mia Brytting, Karin Tegmark-Wisell                                                                                                                                                                                                                                                                                                                                                                                                                                                                                                                                                                                                                                                                                      |
| EPI_ISL_452358, EPI_ISL_452360                                 | Laboratory of Infectious Diseases Center of Beijing Ditan Hospital                           | Laboratory of Infectious Diseases Center of Beijing Ditan Hospital                                                                                                        | Siyan Yang, Chengjie Jie, Fengting Yu, Yunxia Tang, Liting Yan, Linghang Wang                                                                                                                                                                                                                                                                                                                                                                                                                                                                                                                                                                                                                                                                                                                                                                            |
| EPI_ISL_452503                                                 | Clinica Universidad de Navarra. Servicio de Enfermedades Infecciosas y Microbiología clínica | SeqCOVID-SPAIN consortium/IBV(CSIC)                                                                                                                                       | Mirian Fernández-Alonso, Jose Luis del Pozo and SeqCOVID-SPAIN consortium                                                                                                                                                                                                                                                                                                                                                                                                                                                                                                                                                                                                                                                                                                                                                                                |
| EPI_ISL_452692, EPI_ISL_452772                                 | Hospital Universitario Araba. Vitoria-Gasteiz,                                               | SeqCOVID-SPAIN consortium/IBV(CSIC)                                                                                                                                       | Silvia Hernáez Crespo, Carmen Gómez González, Amaia Aguirre Quiñero, Marina Fernández Torres, Maria Rosario Almela Ferrer, Maria Concepción Lecaroz Agara, Andrés Canut Blasco and SeqCOVID-SPAIN consortium                                                                                                                                                                                                                                                                                                                                                                                                                                                                                                                                                                                                                                             |
| EPI_ISL_453423                                                 | Liverpool Clinical Laboratories                                                              | COVID-19 Genomics UK (COG-UK) Consortium                                                                                                                                  | Sam Haldenby, Anita Lucaci, Steve Paterson, Julian Hiscox, Alistair Darby, M Almsaud, A Alrezaihi, Muhannad Altruwaili, Stuart D Armstrong, Jones Benjamin, Eleanor G Bentley, Anu Chawla, Jordan J Clark, Angela Cowell, Richard Eccles, Isabel Garcia-Dorival, Matthew Gemmill, Alessandro Gerada, PKF Gilmore, Richard Gregory, Ximeng Han, Catherine Hartley, Margaret Hughes, Miren Iturriza-Gomara, James Johnson, L Luu, Jenifer Manson, Charlotte Nelson, Elaine O'Toole, Cassie Olateju, Rebekah Penrice-Randal, Lucille Rainbow, N.P Randle, Trevor Ian Robinson, Parul Sharma, Ghada T Shawli, James P Stewart, Neil Swainston, Ecaterina Vamos, Joanne Watts, Mark Whitehead                                                                                                                                                                 |
| EPI_ISL_454572                                                 | National Center of Expertise                                                                 | National Center for Expertise, Kazakhstan National Center for Biotechnology, Kazakhstan                                                                                   | Abdaliyev Askar, Shevtsov Alexandr, Akhmetolayev Ilyas, Kalendar Ruslan, Rakhmetova Akbota, Lutsay Viktoriya, Amirgazin Asylulan, Aushakhmetova Zabira, Ramankulov Yerlan                                                                                                                                                                                                                                                                                                                                                                                                                                                                                                                                                                                                                                                                                |
| EPI_ISL_454912, EPI_ISL_454980, EPI_ISL_454981                 | Wuhan Chain Medical Labs (CMLabs)                                                            | State Key Laboratory of Biotherapy of Sichuan University                                                                                                                  | Baowen Du, Minjin Wang, Chao Tang, Chuan Chen, Yongzhao Zhou, Mingxia Yu, Hancheng Wei, Weimin Li, Jing-wen Lin, Jia Geng, Binwu Ying, Lu Chen                                                                                                                                                                                                                                                                                                                                                                                                                                                                                                                                                                                                                                                                                                           |
| EPI_ISL_455845                                                 | Skovde/Unilabs                                                                               | The Public Health Agency of Sweden                                                                                                                                        | Anna-Malin Linde, Maria Lind Karlberg, Mattias Haukland, Reza Advani, Olov Svartstrom, Oskar Karlsson Lindsjö, Petra Edquist, Shamam Muradrasoli, Anna Risberg, Karin Tegmark-Wisell                                                                                                                                                                                                                                                                                                                                                                                                                                                                                                                                                                                                                                                                     |
| EPI_ISL_456146                                                 | Instituto Nacional de Salud - Unidad de Secuenciación y Análisis Genómico                    | Instituto Nacional de Salud, Universidad Cooperativa de Colombia, Instituto Alexander von Humboldt, Imperial College-London, London School of Hygiene & Tropical Medicine | Katherine Laiton-Donato, Diego A. Álvarez-Díaz, Carlos Franco-Muñoz, Jose A. Usme-Ciro, Gloria Puerto, Nicolás D. Franco-Sierra, Maily N. Gonzalez, Zulma M. Cucunubá, Christian Julian Villabona Arenas, Liz Villabona-Arenas, Sussy Echeverría, Astrid C. Flórez, Sergio Gomez-Rangel, Luz Dary Rodríguez, Juliana Barbosa, Erika Ospitia, Diana Marcela Walteros-Acero, Martha Lucia Ospina Martínez, Marcela Mercado-Reyes.                                                                                                                                                                                                                                                                                                                                                                                                                          |
| EPI_ISL_456315                                                 | Southern Community Labs Dunedin                                                              | Institute of Environmental Science and Research (ESR)                                                                                                                     | Matt Storey, Xiaoyun Ren, Anja Werno, Antje van der Linden, Arlo Upton, Chris Mansell, David Hammer, Dragana Drinkovic, Erasmus Smit, Gary McAuliffe, Hana Sofia Andersson, James Usher, Jill Sherwood, Josh Freeman, Julia Howard, Juliet Elvy, Mary DeAlmeida, Matt Blakiston, Matthew Rogers, Max Bloomfield, Michael Addidle, Michelle Balm, Sally Roberts, Sarah Jefferies, Sharmini Muttaiyah, Susan Morpeth, Susan Taylor, Timothy Blackmore, Vani Sathyendran, Veronica Playle, Virginia Hope, Erasmus Smit, Lauren Jelly, Joep de Ligt                                                                                                                                                                                                                                                                                                          |
| EPI_ISL_456484, EPI_ISL_456512                                 | Victorian Infectious Diseases Reference Laboratory (VIDRL)                                   | Microbiological Diagnostic Unit Public Health Laboratory and Victorian Infectious Diseases Reference Laboratory, Doherty Institute                                        | Caly L., Seemann T., Sait, M., Schultz M., Druce J., Sherry, N.                                                                                                                                                                                                                                                                                                                                                                                                                                                                                                                                                                                                                                                                                                                                                                                          |
| EPI_ISL_457726                                                 | TSGH-CP molecular lab                                                                        | TSGH-CP molecular lab                                                                                                                                                     | Cheng-Lih Perng, Ming-Jr JIAN, Chih-Kai Chang, Jung-Chung Lin, Kuo-Ming Yeh, Chien-Wen Chen, Sheng-Kang Chiu, Hsing-Yi Chung, Shih-Hung Tsai, Kuo-Sheng Hung, Tien-Yao Chang, Feng-Yee Chang, Hung-Sheng Shang                                                                                                                                                                                                                                                                                                                                                                                                                                                                                                                                                                                                                                           |
| EPI_ISL_457996                                                 | Oman-NIC                                                                                     | Oman-NIC                                                                                                                                                                  | Samira Al-Maruqi, Fahad Zadjali, Amina Al Jardani, Khulood Al-Mammary, Hanan Al-kind, Fatma BaAlawi, Hamida AL Barwani, Zeyana AL-Dahmani, Intisar Al-Shukri, Aisha Al-Busaidi, Aisha Al-Amri, Ahlam Al-Amri, Mohammed Al-Tobi, Samiha Al Kharusi, Abdulla Balkhair                                                                                                                                                                                                                                                                                                                                                                                                                                                                                                                                                                                      |
| EPI_ISL_458143, EPI_ISL_458144                                 | Evandro Chagas Institute                                                                     | Evandro Chagas Institute                                                                                                                                                  | Santos, M.C.; Silva, A.M.; Junior, W.D.C.; Barbagelata, L.S.; Ferreira, J.A.; Sousa, E.M.A.; da Silva, P.S.; Resque, H.R.; Martins, L.C.; Sousa Junior, E.C.; Viana, G.M.R                                                                                                                                                                                                                                                                                                                                                                                                                                                                                                                                                                                                                                                                               |
| EPI_ISL_458286                                                 | unknown                                                                                      | Bundeswehr Institute of Microbiology                                                                                                                                      | Handrick, S., Bestehorn-Willmann, M.S., Eckstein, S., Walter, M.C., Antwerpen, M.H., Rehn, A., Najia, H., Stoecker, K., Woelfel, R. and Ben Moussa, M.                                                                                                                                                                                                                                                                                                                                                                                                                                                                                                                                                                                                                                                                                                   |
| EPI_ISL_458535, EPI_ISL_459245                                 | Department of Pathology, University of Cambridge                                             | Wellcome Sanger Institute for the COVID-19 Genomics UK (COG-UK) consortium                                                                                                | Luke W Meredith, M. Estée Török, Myra Hosmillo, William L. Hamilton, Martin D. Curran, Theresa Feltwell, Grant Hall, Anna Yakovleva, Fahad A Khokhar, Charlotte J. Houldcroft, Laura G Caller, Aminu S. Jahun, Sarah L. Caddy, Ian Goodfellow; and Alex Alderton, Roberto Amato, Sonia Goncalves, Ewan Harrison, David K. Jackson, Ian Johnston, Dominic Kwiatkowski, Cordelia Langford, John Sillitoe on behalf of the Wellcome Sanger Institute COVID-19 Surveillance Team ( <a href="http://www.sanger.ac.uk/covid-team">http://www.sanger.ac.uk/covid-team</a> )                                                                                                                                                                                                                                                                                     |
| EPI_ISL_459892                                                 | Kingston Health Sciences Center                                                              | Queen's Genomics Lab at Ongwanada (Q-GLO)                                                                                                                                 | Sjaarda CP, Rustom N, Huang D, Perez-Patrigeon S, Hudson ML, Wong H, Guan H, Ayub M, Soares CN, Colauti R, Evans GA, Sheth P                                                                                                                                                                                                                                                                                                                                                                                                                                                                                                                                                                                                                                                                                                                             |
| EPI_ISL_460065                                                 | Minnesota Department of Health, Public Health Laboratory                                     | Minnesota Department of Health, Public Health Laboratory                                                                                                                  | Matt Plumb, Jacob Garfin, and Xiong Wang                                                                                                                                                                                                                                                                                                                                                                                                                                                                                                                                                                                                                                                                                                                                                                                                                 |
| EPI_ISL_460086                                                 | Molecular Virology Unit, Fondazione IRCCS Policlinico San Matteo, Pavia                      | Laboratory of Virology, INMI Lazzaro Spallanzani IRCCS                                                                                                                    | Maria R. Capobianchi, Fausto Baldanti, Antonio Piralla, Antonino Di Caro, Barbara Bartolini, Cesare E.M. Gruber, Martina Rueca                                                                                                                                                                                                                                                                                                                                                                                                                                                                                                                                                                                                                                                                                                                           |
| EPI_ISL_460384, EPI_ISL_460413                                 | Massachusetts General Hospital                                                               | Infectious Disease Program, Broad Institute of Harvard and MIT                                                                                                            | Lemieux, J.E., Siddle, K.J., Shaw, B., Adams, G., Pierce, V., Turbett, S., Anahtar, M., Branda, J., Slater, D., Harris, J., Lin, A.E., Gladden-Young, A., Lagerborg, K., Rudy, M., DeRuff, K., Carter, A., Normandin, E., Bauer, M., Reilly, S., Tomkins-Tinch, C., Loreth, C., Chaluvadi, S., Neumann, A., Cusick, C., Chapman, S.B., Gnirke, A., Flowers, K., Cerrato, F., Birren, B.W., Gallagher, G., Smole, S., Park, D.J., MacInnis, B.L., Ryan, E., LaRoque, R., Rosenberg, E., Sabeti, P.C.                                                                                                                                                                                                                                                                                                                                                      |
| EPI_ISL_467101                                                 | Hospital Universitario Araba. Vitoria-Gasteiz                                                | SeqCOVID-SPAIN consortium/IBV(CSIC)                                                                                                                                       | Silvia Hernáez Crespo, Carmen Gómez González, Amaia Aguirre Quiñero, Marina Fernández Torres, Mª Rosario Almela Ferrer, Mª Concepción Lecaroz Agara, Andrés Canut Blasco, and SeqCOVID-SPAIN consortium                                                                                                                                                                                                                                                                                                                                                                                                                                                                                                                                                                                                                                                  |
| EPI_ISL_467433, EPI_ISL_467434                                 | AMPATH-DBN                                                                                   | KRISP, KZN Research Innovation and Sequencing Platform                                                                                                                    | Giandhari J, Pillay S, Lessells R, Chimukangara B, Mdlalose K, York D, Khan S, Tegally H, Wilkinson E, de Oliveira T                                                                                                                                                                                                                                                                                                                                                                                                                                                                                                                                                                                                                                                                                                                                     |
| EPI_ISL_467441, EPI_ISL_467442, EPI_ISL_467443                 | NHLS-IALCH                                                                                   | KRISP, KZN Research Innovation and Sequencing Platform                                                                                                                    | Giandhari J, Pillay S, Lessells R, Chimukangara B, Mdlalose K, York D, Khan S, Tegally H, Wilkinson E, de Oliveira T                                                                                                                                                                                                                                                                                                                                                                                                                                                                                                                                                                                                                                                                                                                                     |
| EPI_ISL_467444                                                 | Molecular Diagnostics Services (MDS)                                                         | KRISP, KZN Research Innovation and Sequencing Platform                                                                                                                    | Giandhari J, Pillay S, Lessells R, Chimukangara B, Mdlalose K, York D, Khan S, Tegally H, Wilkinson E, de Oliveira T                                                                                                                                                                                                                                                                                                                                                                                                                                                                                                                                                                                                                                                                                                                                     |
| EPI_ISL_467451, EPI_ISL_467468                                 | AMPATH-DBN                                                                                   | KRISP, KZN Research Innovation and Sequencing Platform                                                                                                                    | Giandhari J, Pillay S, Lessells R, Chimukangara B, Mdlalose K, York D, Khan S, Tegally H, Wilkinson E, de Oliveira T                                                                                                                                                                                                                                                                                                                                                                                                                                                                                                                                                                                                                                                                                                                                     |
| EPI_ISL_467990                                                 | SA Pathology                                                                                 | SA Pathology                                                                                                                                                              | Leong, LEX, Lim, CK, Turra, M, Bastian, I, Higgins, G                                                                                                                                                                                                                                                                                                                                                                                                                                                                                                                                                                                                                                                                                                                                                                                                    |
| EPI_ISL_468002, EPI_ISL_468009, EPI_ISL_468017, EPI_ISL_468019 | SA Pathology                                                                                 | SA Pathology                                                                                                                                                              | Lex Leong, Chuan Kok Lim, Mark Turra, Ivan Bastian, Geoff Higgins                                                                                                                                                                                                                                                                                                                                                                                                                                                                                                                                                                                                                                                                                                                                                                                        |
| EPI_ISL_468160                                                 | unknown                                                                                      | Department of Virology, Public Health Laboratories Division,                                                                                                              | Massab Umair, Aamer Ikram, Muhammad Salman, Adnan Khurshid, Nazish Badar, Shannon Whitmer, John Klana                                                                                                                                                                                                                                                                                                                                                                                                                                                                                                                                                                                                                                                                                                                                                    |

|                                                |                                                                                                                                                                                                                     |                                                                                                                                                                          |                                                                                                                                                                                                                                                                                                                                                                                                                                                                                                                                                                                                                                                                                           |
|------------------------------------------------|---------------------------------------------------------------------------------------------------------------------------------------------------------------------------------------------------------------------|--------------------------------------------------------------------------------------------------------------------------------------------------------------------------|-------------------------------------------------------------------------------------------------------------------------------------------------------------------------------------------------------------------------------------------------------------------------------------------------------------------------------------------------------------------------------------------------------------------------------------------------------------------------------------------------------------------------------------------------------------------------------------------------------------------------------------------------------------------------------------------|
| EPI_ISL_468161                                 | Department of Virology, Public Health Laboratories Division, National Institute of Health                                                                                                                           | Department of Virology, Public Health Laboratories Division, National Institute of Health                                                                                | Massab Umair, Aamer Ikram, Muhammad Salman, Adnan Khurshid, Nazish Badar, Shannon Whitmer, John Klerna                                                                                                                                                                                                                                                                                                                                                                                                                                                                                                                                                                                    |
| EPI_ISL_468212                                 | Viollier AG                                                                                                                                                                                                         | Department of Biosystems Science and Engineering, ETH Zürich                                                                                                             | Christian Beisel, Sarah Nadeau, Ivan Topolsky, Pedro Ferreira, Philipp Jablonski, Susana Posada-Céspedes, Tobias Schär, Ina Nissen, Natascha Santacroce, Elodie Burcklen, Christiane Beckmann, Maurice Redondo, Olivier Kobel, Christoph Noppen, Sophie Seidel, Noemie Santamaria de Souza, Niko Beerenwinkel, Tanja Stadler                                                                                                                                                                                                                                                                                                                                                              |
| EPI_ISL_468575                                 | Quest Diagnostics                                                                                                                                                                                                   | Quest Diagnostics                                                                                                                                                        | Anderson,B.P., Rosenthal,S.H., Gerasimova,A., Kagan,R.M. and Owen, R.                                                                                                                                                                                                                                                                                                                                                                                                                                                                                                                                                                                                                     |
| EPI_ISL_468979                                 | Servicio de Microbiología, Hospital Universitario Son Espases                                                                                                                                                       | SeqCOVID-SPAIN consortium/IBV(CSIC)                                                                                                                                      | Carla López-Causapé, Jordi Reina, Antonio Oliver and SeqCOVID-SPAIN consortium                                                                                                                                                                                                                                                                                                                                                                                                                                                                                                                                                                                                            |
| EPI_ISL_469311, EPI_ISL_469313, EPI_ISL_469315 | NU-OMICS DNA Sequencing research facility, Northumbria University                                                                                                                                                   | Wellcome Sanger Institute for the COVID-19 Genomics UK (COG-UK) consortium                                                                                               | Chris Duncan, Shea Waugh, Shirelle Burton-Fanning, Gary Eltringham, Jennifer Collins, Brendan Payne, Yusri Taha, Emma Swindells, Jane Greenaway, Edward Barton, Garren Scott, Debra Padgett, Clive Graham, Sarah Essex, Steve Liggett, Paul Baker, Lynn Dover, Wen Yew, Gary Black, John Allan, Joshua Loh, Greg Young, Matthew Bashton, Andrew Nelson, Darren Smith and Alex Alderton, Roberto Amato, Sonia Goncalves, Ewan Harrison, David K Jackson, Ian Johnston, Dominic Kwiatkowski, Cordelia Langford, John Sillitoe on behalf of the Wellcome Sanger Institute COVID-19 Surveillance Team ( <a href="http://www.sanger.ac.uk/covid-team">http://www.sanger.ac.uk/covid-team</a> ) |
| EPI_ISL_470830                                 | PathWest Laboratory Medicine WA                                                                                                                                                                                     | PathWest Laboratory Medicine WA                                                                                                                                          | Chisha Sikazwe, Jurissa Lang, Avram Levy, David Smith and David Speers                                                                                                                                                                                                                                                                                                                                                                                                                                                                                                                                                                                                                    |
| EPI_ISL_471602                                 | CSIR-Centre for Cellular and Molecular Biology                                                                                                                                                                      | CSIR-Centre for Cellular and Molecular Biology                                                                                                                           | Sakshi Shambhavi, Lamuk Zaveri, Shagufta Khan, Namami Gaur, Tulasi Nagabandi, Purushotham Vodnala, Payel Mukherjee, Sofia Banu, Priya Singh, Dhiviya Vedagiri, Divya Gupta, Vishal Sah, Santosh Kumar Kuncha, Krishnan Harinivas Harshan, Archana Bharadwaj Siva, Karthik Bharadwaj Tallapaka, Nikhil Hajirnis, Pratheusa Maccha, M Soujanya Reddy, G. Aditya Kumar, Koushick Sivakumar, Disha Nanda, Divya Das, Jotin Gogoi, Manish Bhattacharjee, Ravi Prasad Mukku, Rakesh K Mishra, Divya Tej Sowpati                                                                                                                                                                                 |
| EPI_ISL_471610                                 | CSIR-Centre for Cellular and Molecular Biology                                                                                                                                                                      | CSIR-Centre for Cellular and Molecular Biology                                                                                                                           | Sofia Banu, Payel Mukherjee, Priya Singh, Dhiviya Vedagiri, Divya Gupta, Vishal Sah, Santosh Kumar Kuncha, Krishnan Harinivas Harshan, Archana Bharadwaj Siva, Karthik Bharadwaj Tallapaka, Shagufta Khan, Lamuk Zaveri, Namami Gaur, Sakshi Shambhavi, Tulasi Nagabandi, Purushotham Vodnala, Preethi Jampala, Sharada Ravi Iyer, Sulagana Mukherjee, Swetha Sundar, Peddapuvula Sai Uday Kiran, Rakesh K Mishra, Divya Tej Sowpati                                                                                                                                                                                                                                                      |
| EPI_ISL_474970, EPI_ISL_475008                 | Israel Central Virology laboratory                                                                                                                                                                                  | Israel Central Virology laboratory                                                                                                                                       | Neta Zuckerman, Efrat Dahan Bucris, Oran Erster, Ella Mendelson, Michal Mandelboim                                                                                                                                                                                                                                                                                                                                                                                                                                                                                                                                                                                                        |
| EPI_ISL_475108                                 | Skovde/Unilabs                                                                                                                                                                                                      | The Public Health Agency of Sweden                                                                                                                                       | Oskar Karlsson Lindsjo, Maria Lind Karlberg, Mattias Haukland, Reza Advani, Olov Svartstrom, Anna-Malin Linde, Sandra Brodsson, Petra Edquist, Shamam Muradrasoli, Anna Risberg, Karin Tegmark-Wisell                                                                                                                                                                                                                                                                                                                                                                                                                                                                                     |
| EPI_ISL_475720                                 | Microbiology, University Hospital Donostia                                                                                                                                                                          | Microbiology, University Hospital Donostia                                                                                                                               | Cilla,G., Montes,M., Pineiro,L., Marimon,J.M.                                                                                                                                                                                                                                                                                                                                                                                                                                                                                                                                                                                                                                             |
| EPI_ISL_476139                                 | Folkhalsomyndigheten                                                                                                                                                                                                | The Public Health Agency of Sweden                                                                                                                                       | Oskar Karlsson Lindsjo, Maria Lind Karlberg, Mattias Haukland, Reza Advani, Olov Svartstrom, Anna-Malin Linde, Sandra Brodsson, Petra Edquist, Shamam Muradrasoli, Anna Risberg, Karin Tegmark-Wisell                                                                                                                                                                                                                                                                                                                                                                                                                                                                                     |
| EPI_ISL_476829, EPI_ISL_476830, EPI_ISL_476831 | Laboratoire des Fièvres Hémorragiques Virales du Benin                                                                                                                                                              | Charité-Universitätsmedizin Berlin                                                                                                                                       | Yadouleton, Anges; Sander Anna-Lena; Moreira-Soto Andres; Drexler, Jan Felix                                                                                                                                                                                                                                                                                                                                                                                                                                                                                                                                                                                                              |
| EPI_ISL_476874                                 | Department of MicroBiology, Government Medical College, Surat                                                                                                                                                       | Gujarat Biotechnology Research Centre                                                                                                                                    | Janvi Raval, Zarna Patel, Monika Gandhi, Pinal Trivedi, Maharshi Pandya, Nidhi Patel, Nitin Savaliya, Raghawendra Kumar, Dinesh Kumar, Zuber Saiyed, Komal Patel, Labdhi Pandya, Afzal Ansari, Nikha Trivedi, Naresh Chauhan, Summaiya Mullan, Amit gamit, Apurvasinh Puvar, R D Dixit, A M Kadri, Harsh Bakshi, Chaitanya Joshi, Madhvi Joshi                                                                                                                                                                                                                                                                                                                                            |
| EPI_ISL_476875                                 | Department of MicroBiology, Government Medical College, Surat                                                                                                                                                       | Gujarat Biotechnology Research Centre                                                                                                                                    | Zarna Patel, Monika Gandhi, Pinal Trivedi, Maharshi Pandya, Nidhi Patel, Nitin Savaliya, Raghawendra Kumar, Dinesh Kumar, Zuber Saiyed, Komal Patel, Labdhi Pandya, Afzal Ansari, Nikha Trivedi, Naresh Chauhan, Summaiya Mullan, Amit gamit, Apurvasinh Puvar, Janvi Raval, R D Dixit, A M Kadri, Harsh Bakshi, Chaitanya Joshi, Madhvi Joshi                                                                                                                                                                                                                                                                                                                                            |
| EPI_ISL_476881                                 | Department of MicroBiology, Government Medical College, Surat                                                                                                                                                       | Gujarat Biotechnology Research Centre                                                                                                                                    | Dinesh Kumar, Zuber Saiyed, Komal Patel, Labdhi Pandya, Afzal Ansari, Nikha Trivedi, Naresh Chauhan, Summaiya Mullan, Amit gamit, Apurvasinh Puvar, Janvi Raval, Zarna Patel, Monika Gandhi, Pinal Trivedi, Maharshi Pandya, Nidhi Patel, Nitin Savaliya, Raghawendra Kumar, R D Dixit, A M Kadri, Harsh Bakshi, Chaitanya Joshi, Madhvi Joshi                                                                                                                                                                                                                                                                                                                                            |
| EPI_ISL_479883, EPI_ISL_479884, EPI_ISL_479885 | Sapporo City Institute of Public Health                                                                                                                                                                             | Pathogen Genomics Center, National Institute of Infectious Diseases                                                                                                      | Tsuyoshi Sekizuka, Asami Ohnishi, Kentaro Itokawa, Rina Tanaka, Masanori Hashino, Hajime Kamiya, Motoi Suzuki, Makoto Kuroda                                                                                                                                                                                                                                                                                                                                                                                                                                                                                                                                                              |
| EPI_ISL_480727                                 | Victorian Infectious Diseases Reference Laboratory (VIDRL)                                                                                                                                                          | VIDRL and MDU-PHL                                                                                                                                                        | Caly L., Seemann T., Sait, M., Schultz M., Druce J., Sherry, N.                                                                                                                                                                                                                                                                                                                                                                                                                                                                                                                                                                                                                           |
| EPI_ISL_482874                                 | Institut Pasteur Dakar                                                                                                                                                                                              | Institut Pasteur de Dakar                                                                                                                                                | Ndongo Dia, Moussa Moise Diagne, Mamadou Diop, Marie Henriette Dior Ndione, Mamadou malado Jallow, Safietou Sankhe, Ousmane Faye, Amadou Alpha Sall.                                                                                                                                                                                                                                                                                                                                                                                                                                                                                                                                      |
| EPI_ISL_483709                                 | Israel Central Virology laboratory                                                                                                                                                                                  | Israel Central Virology laboratory                                                                                                                                       | Neta Zuckerman, Efrat Dahan Bucris, Oran Erster, Ella Mendelson, Michal Mandelboim                                                                                                                                                                                                                                                                                                                                                                                                                                                                                                                                                                                                        |
| EPI_ISL_486660                                 | Microbiology, Virology and Biemergency Laboratory-ASST FBF Sacco                                                                                                                                                    | Microbiology, Virology and Biemergency Laboratory-ASST FBF Sacco                                                                                                         | Rimoldi SG, Comandatore F, Romeri F, Mancon A, Micheli V                                                                                                                                                                                                                                                                                                                                                                                                                                                                                                                                                                                                                                  |
| EPI_ISL_487447, EPI_ISL_487457                 | CICM-Mali                                                                                                                                                                                                           | Bundeswehr Institut of Microbiology                                                                                                                                      | Kouriba, Dürr, Sangaré, Rehn, Traoré, Bestehorn-Willmann, Walter, Quedraogo, Zimmermann, Maiga, Heitzer, Sogodogo, Antwerpen, Wölfel                                                                                                                                                                                                                                                                                                                                                                                                                                                                                                                                                      |
| EPI_ISL_488071, EPI_ISL_488074                 | NU-OMICS DNA Sequencing research facility, Northumbria University                                                                                                                                                   | Wellcome Sanger Institute for the COVID-19 Genomics UK (COG-UK) consortium                                                                                               | Chris Duncan, Shea Waugh, Shirelle Burton-Fanning, Gary Eltringham, Jennifer Collins, Brendan Payne, Yusri Taha, Emma Swindells, Jane Greenaway, Edward Barton, Garren Scott, Debra Padgett, Clive Graham, Sarah Essex, Steve Liggett, Paul Baker, Lynn Dover, Wen Yew, Gary Black, John Allan, Joshua Loh, Greg Young, Matthew Bashton, Andrew Nelson, Darren Smith and Alex Alderton, Roberto Amato, Sonia Goncalves, Ewan Harrison, David K Jackson, Ian Johnston, Dominic Kwiatkowski, Cordelia Langford, John Sillitoe on behalf of the Wellcome Sanger Institute COVID-19 Surveillance Team ( <a href="http://www.sanger.ac.uk/covid-team">http://www.sanger.ac.uk/covid-team</a> ) |
| EPI_ISL_490025                                 | South Eastern Area Laboratory Services (SEALS)                                                                                                                                                                      | NSW Health Pathology - Institute of Clinical Pathology and Medical Research; Westmead Hospital; University of Sydney                                                     | CIDM-PH et al.                                                                                                                                                                                                                                                                                                                                                                                                                                                                                                                                                                                                                                                                            |
| EPI_ISL_491029                                 | UW Virology Lab                                                                                                                                                                                                     | UW Virology Lab                                                                                                                                                          | Pavitra Roychoudhury, Hong Xie, Lasata Shrestha, Amin Addetia, Truong Nguyen, Victoria M Racheff, Meei-Li Huang, Keith R Jerome, Alexander Greninger                                                                                                                                                                                                                                                                                                                                                                                                                                                                                                                                      |
| EPI_ISL_493157, EPI_ISL_493170                 | National Virus Resource Center, Chinese Academy of Sciences, Wuhan 430071, China                                                                                                                                    | Computational Virology Group, Center for Bacteria and Viruses Resources and Bioinformatics, Wuhan Institute of Virology, Chinese Academy of Sciences Wuhan 430071, China | Jianjun Chen, Yi Yan, Yi Huang, Jin Xiong, Hongping Wei, Di Liu                                                                                                                                                                                                                                                                                                                                                                                                                                                                                                                                                                                                                           |
| EPI_ISL_493478                                 | Northumbria University / South Tees Hospitals NHS Foundation Trust / North Cumbria Integrated Care NHS Foundation Trust / North Tees and Hartlepool NHS Foundation Trust / Newcastle Hospitals NHS Foundation Trust | COVID-19 Genomics UK (COG-UK) Consortium                                                                                                                                 | Darren L Smith, Andrew Nelson, Matthew Bashton, Greg R Young, Joshua Loh, John Allan, Mohammad A Tariq, Giles S Holt, Gary Black, Wen C Yew, Lynn Dover, Paul Baker, Steve Liggett, Sarah Essex, Jane Greenaway, Debra Padgett, Clive Graham, Garren Scott, Edward Barton, Emma Swindells, Brendan Payne, Jennifer Collins, Yusri Taha, Gary Eltringham                                                                                                                                                                                                                                                                                                                                   |
| EPI_ISL_495286                                 | Osmania Medical College                                                                                                                                                                                             | CSIR-Centre for Cellular and Molecular Biology                                                                                                                           | Shashikala Reddy, Mahboob Khan, Sofia Banu, Payel Mukherjee, Priya Singh, Onkar Kulkarni, Dhiviya Vedagiri, Divya Gupta, Vishal Sah, Santosh Kumar Kuncha, Krishnan Harinivas Harshan, Archana Bharadwaj Siva, Karthik Bharadwaj Tallapaka, Shagufta Khan, Lamuk Zaveri, Namami Gaur, Sakshi Shambhavi, Nikhil Hajirnis, M Soujanya Reddy, Pratheusa Maccha, Tulasi Nagabandi, Purushotham Vodnala, Rakesh K Mishra, Divya Tej Sowpati                                                                                                                                                                                                                                                    |
| EPI_ISL_495287                                 | Osmania Medical College                                                                                                                                                                                             | CSIR-Centre for Cellular and Molecular Biology                                                                                                                           | Shashikala Reddy, Mahboob Khan, Onkar Kulkarni, Sofia Banu, Payel Mukherjee, Priya Singh, Dhiviya Vedagiri, Divya Gupta, Vishal Sah, Santosh Kumar Kuncha, Krishnan Harinivas Harshan, Archana Bharadwaj Siva, Karthik Bharadwaj Tallapaka, Shagufta Khan, Lamuk Zaveri, Namami Gaur, Sakshi Shambhavi, Pratheusa Maccha, Lamuk Zaveri, Namami Gaur, Sakshi Shambhavi, Tulasi Nagabandi, Purushotham Vodnala, Rakesh K Mishra, Divya Tej Sowpati                                                                                                                                                                                                                                          |
| EPI_ISL_495292                                 | Osmania Medical College                                                                                                                                                                                             | CSIR-Centre for Cellular and Molecular Biology                                                                                                                           | Shashikala Reddy, Mahboob Khan, Shagufta Khan, Sofia Banu, Payel Mukherjee, Priya Singh, Onkar Kulkarni, Dhiviya Vedagiri, Divya Gupta, Vishal Sah, Santosh Kumar Kuncha, Krishnan Harinivas Harshan, Archana Bharadwaj Siva, Karthik Bharadwaj Tallapaka, Lamuk Zaveri, Namami Gaur, Sakshi Shambhavi, Nikhil Hajirnis, M Soujanya Reddy, Pratheusa Maccha, Tulasi Nagabandi, Purushotham Vodnala, Rakesh K Mishra, Divya Tej Sowpati                                                                                                                                                                                                                                                    |

|                                                                                                                                                                                                                                                                                                                                                                |                                                                                                                                                                                                                     |                                                                                                     |                                                                                                                                                                                                                                                                                                                                                                                                                                                                                      |
|----------------------------------------------------------------------------------------------------------------------------------------------------------------------------------------------------------------------------------------------------------------------------------------------------------------------------------------------------------------|---------------------------------------------------------------------------------------------------------------------------------------------------------------------------------------------------------------------|-----------------------------------------------------------------------------------------------------|--------------------------------------------------------------------------------------------------------------------------------------------------------------------------------------------------------------------------------------------------------------------------------------------------------------------------------------------------------------------------------------------------------------------------------------------------------------------------------------|
| EPI_ISL_495294                                                                                                                                                                                                                                                                                                                                                 | Osmania Medical College                                                                                                                                                                                             | CSIR-Centre for Cellular and Molecular Biology                                                      | Shashikala Reddy, Mahboob Khan, Onkar Kulkarni, Lamuk Zaveri, Sofia Banu, Payel Mukherjee, Shagufta Khan, Priya Singh, Dhiviya Vedagiri, Divya Gupta, Vishal Sah, Santosh Kumar Kuncha, Krishnan Harinivas Harshan, Archana Bharadwaj Siva, Karthik Bharadwaj Tallapaka, Namami Gaur, Sakshi Shambhavi, Nikhil Hajirnis, M Soujanya Reddy, Pratheusa Maccha, Tulasi Nagabandi, Purushotham Vodnala, Rakesh K Mishra, Divya Tej Sowpati                                               |
| EPI_ISL_496607, EPI_ISL_496609, EPI_ISL_496617                                                                                                                                                                                                                                                                                                                 | Gorgas Memorial Laboratory of Health Studies                                                                                                                                                                        | Gorgas Memorial Laboratory of Health Studies                                                        | Danilo Franco, Claudia Gonzalez Sandra Lopez-Verges, Alexander A Martinez                                                                                                                                                                                                                                                                                                                                                                                                            |
| EPI_ISL_497132                                                                                                                                                                                                                                                                                                                                                 | Washington State Department of Health                                                                                                                                                                               | Seattle Flu Study                                                                                   | Deborah A. Nickerson, Chris D. Frazier, Jover Lee, Benjamin Pelle, Matthew Richardson, Amanda Adler, Elisabeth Brandstetter, Peter D. Han, Kairsten Fay, Misja Ilicsin, Kirsten Lacombe, Thomas R. Sibley, Melissa Truong, Caitlin R. Wolf, Romesh Gautom, Geoff Melly, Brian Hiatt, Philip Dykema, Scott Lindquist, Michael Boeckh, Janet A. Englund, Michael Famulare, Barry R. Lutz, Mark J. Rieder, Lea M. Starita, Matthew Thompson, Helen Y. Chu, Jay Shendure, Trevor Bedford |
| EPI_ISL_507115                                                                                                                                                                                                                                                                                                                                                 | Northumbria University / South Tees Hospitals NHS Foundation Trust / North Cumbria Integrated Care NHS Foundation Trust / North Tees and Hartlepool NHS Foundation Trust / Newcastle Hospitals NHS Foundation Trust | COVID-19 Genomics UK (COG-UK) Consortium                                                            | Darren L. Smith, Andrew Nelson, Matthew Bashton, Greg R Young, Joshua Loh, John Allan, Mohammad A Tariq, Giles S Holt, Gary Black, Wen C Yew, Lynn Dover, Paul Baker, Steve Liggett, Sarah Essex, Jane Greenaway, Debra Padgett, Clive Graham, Garren Scott, Edward Barton, Emma Swindells, Brendan Payne, Jennifer Collins, Yusra Taha, Gary Eltringham                                                                                                                             |
| EPI_ISL_508263                                                                                                                                                                                                                                                                                                                                                 | Government Medical College                                                                                                                                                                                          | National Institute of Biomedical Genomics                                                           | Arindam Maitra, Jyoti Iravane, Dhaval Khatri, Maitrik Dave, Saumitra Das                                                                                                                                                                                                                                                                                                                                                                                                             |
| EPI_ISL_508334                                                                                                                                                                                                                                                                                                                                                 | Indian Institute of Science                                                                                                                                                                                         | National Institute of Biomedical Genomics                                                           | Arindam Maitra, Bharath K Sundararaj, Harsha Raheja, N. Srinivasan, Deepak K Saini, Amit Singh, Saumitra Das                                                                                                                                                                                                                                                                                                                                                                         |
| EPI_ISL_509432, EPI_ISL_509433, EPI_ISL_509435                                                                                                                                                                                                                                                                                                                 | Centro de Desenvolvimento Tecnológico em Saúde, Fundacao Oswaldo Cruz                                                                                                                                               | Centro de Desenvolvimento Tecnológico em Saúde, Fundacao Oswaldo Cruz                               | Souza, T.M., Fintelman-Rodrigues, N., De Paula, A.D., Saraiva, F.B., Ferreira, M.A., Sacramento, C.Q., Medeiros, M.A.                                                                                                                                                                                                                                                                                                                                                                |
| EPI_ISL_509949, EPI_ISL_509956                                                                                                                                                                                                                                                                                                                                 | University of Wisconsin-Madison AIDS Vaccine Research Laboratories                                                                                                                                                  | University of Wisconsin-Madison AIDS Vaccine Research Laboratories                                  | Gage Moreno, Katarina Braun, et al. AIDS Vaccine Research Laboratories                                                                                                                                                                                                                                                                                                                                                                                                               |
| EPI_ISL_512921, EPI_ISL_512930                                                                                                                                                                                                                                                                                                                                 | Pathogen Genomics Lab King Abdullah University of Science and Technology (KAUST)                                                                                                                                    | Pathogen Genomics Lab King Abdullah University of Science and Technology (KAUST)                    | Fadwa Alofi, Sharif Hala, Rahul P Salunke, Sara Mfarrej, Amit Kumar Subudhi, Fathia Ben Rached, Amanda, Luke, Afrah Alsomali, Asim Khogeer, Jumana Taha, Abdulaziz Alahmadi, Kahled Alghithami, Raaeece Naeem, Anwar Hashem, Naif Almontashiri, Arnab Pain                                                                                                                                                                                                                           |
| EPI_ISL_512963                                                                                                                                                                                                                                                                                                                                                 | Pathogen Genomics Lab King Abdullah University of Science and Technology (KAUST)                                                                                                                                    | Pathogen Genomics Lab King Abdullah University of Science and Technology (KAUST)                    | Sara Mfarrej, Raaeece Naeem, Rahul P Salunke, Sharif Hala, Fadwa Alofi, Amit Kumar Subudhi, Fathia Ben Rached, Afrah Alsomali, Jumana Taha, Abdulaziz Alahmadi, Asim Khogeer, Nashwa Al-khotani, Anwar Hashem, Naif Almontashiri, Arnab Pain                                                                                                                                                                                                                                         |
| EPI_ISL_513032                                                                                                                                                                                                                                                                                                                                                 | Pathogen Genomics Lab King Abdullah University of Science and Technology (KAUST)                                                                                                                                    | Pathogen Genomics Lab King Abdullah University of Science and Technology (KAUST)                    | Rahul P Salunke, Sharif Hala, Raaeece Naeem, Sara Mfarrej, Amit Kumar Subudhi, Amanda Ooi, Luke Esau, Fadwa Alofi, Fathia Ben Rached, Afrah Alsomali, Asim Khogeer, Ahmad Bakur Mahmoud, Anwar Hashem, Naif Almontashiri, Arnab Pain                                                                                                                                                                                                                                                 |
| EPI_ISL_513109                                                                                                                                                                                                                                                                                                                                                 | Pathogen Genomics Lab King Abdullah University of Science and Technology (KAUST)                                                                                                                                    | Pathogen Genomics Lab King Abdullah University of Science and Technology (KAUST)                    | Fathia Ben Rached, Raaeece Naeem, Sharif Hala, Fadwa Alofi, Rahul P Salunke, Sara Mfarrej, Amit Kumar Subudhi, Afrah Alsomali, Asim Khogeer, Ahmad Bakur Mahmoud, Anwar Hashem, Naif Almontashiri, Arnab Pain                                                                                                                                                                                                                                                                        |
| EPI_ISL_513166                                                                                                                                                                                                                                                                                                                                                 | Pathogen Genomics Lab King Abdullah University of Science and Technology (KAUST)                                                                                                                                    | Pathogen Genomics Lab King Abdullah University of Science and Technology (KAUST)                    | Fadwa Alofi, Sharif Hala, Rahul P Salunke, Sara Mfarrej, Amit Kumar Subudhi, Fathia Ben Rached, Amanda, Luke, Afrah Alsomali, Asim Khogeer, Jumana Taha, Abdulaziz Alahmadi, Kahled Alghithami, Raaeece Naeem, Anwar Hashem, Naif Almontashiri, Arnab Pain                                                                                                                                                                                                                           |
| EPI_ISL_513177                                                                                                                                                                                                                                                                                                                                                 | Pathogen Genomics Lab King Abdullah University of Science and Technology (KAUST)                                                                                                                                    | Pathogen Genomics Lab King Abdullah University of Science and Technology (KAUST)                    | Amit Kumar Subudhi, Rahul P Salunke, Sara Mfarrej, Sharif Hala, Fadwa Alofi, Fathia Ben Rached, Afrah Alsomali, Asim Khogeer, Nashwa Al-khotani, Raaeece Naeem, Anwar Hashem, Naif Almontashiri, Arnab Pain                                                                                                                                                                                                                                                                          |
| EPI_ISL_513216                                                                                                                                                                                                                                                                                                                                                 | Pathogen Genomics Lab King Abdullah University of Science and Technology (KAUST)                                                                                                                                    | Pathogen Genomics Lab King Abdullah University of Science and Technology (KAUST)                    | Sharif Hala, Fadwa Alofi, Sara Mfarrej, Amit Kumar Subudhi, Rahul P Salunke, Fathia Ben Rached, Amanda Ooi, Luke Esau, Afrah Alsomali, Asim Khogeer, Jumana Taha, Abdulaziz Alahmadi, Kahled Alghithami, Raaeece Naeem, Anwar Hashem, Naif Almontashiri, Arnab Pain                                                                                                                                                                                                                  |
| EPI_ISL_513230                                                                                                                                                                                                                                                                                                                                                 | Pathogen Genomics Lab King Abdullah University of Science and Technology (KAUST)                                                                                                                                    | Pathogen Genomics Lab King Abdullah University of Science and Technology (KAUST)                    | Amit Kumar Subudhi, Rahul P Salunke, Sara Mfarrej, Sharif Hala, Fadwa Alofi, Fathia Ben Rached, Afrah Alsomali, Asim Khogeer, Nashwa Al-khotani, Raaeece Naeem, Anwar Hashem, Naif Almontashiri, Arnab Pain                                                                                                                                                                                                                                                                          |
| EPI_ISL_513556                                                                                                                                                                                                                                                                                                                                                 | Programa de Oncovirologia, Instituto Nacional de Câncer                                                                                                                                                             | Programa de Oncovirologia, Instituto Nacional de Câncer                                             | Juliana D. Siqueira, Livia R. Goes, Brunnna M. Alves, Claudia Cicala, James Arthos, João P.B. Viola, Andreia C. de Melo, Marcelo A. Soares                                                                                                                                                                                                                                                                                                                                           |
| EPI_ISL_514130                                                                                                                                                                                                                                                                                                                                                 | National Institute of Laboratory Medicine and Referral Center                                                                                                                                                       | Genomic Research Lab, BCSIR                                                                         | Md. Murshed Hasan Sarkar, Abu Sayeed Mohammad Mahmud, Mohammad Samir Uzzaman, Eshrar Osman, Eshrar Habib, Shahina Akter, Tanjina Akhter Banu, Barna Goswami, Ifat Jahani, Md. Saddam Hossain, Tasnim Nafisa, Md. Maruf Ahmed Molla, Mahmuda Yeasmin, Asish Kumar Ghoshi, A. K. M. Shamsuzzaman, Sheikh Md. Selim Al Din, Utpal Chandra Ray, Salek Ahmed Sajib, Md. Salim Khan                                                                                                        |
| EPI_ISL_515417, EPI_ISL_515424                                                                                                                                                                                                                                                                                                                                 | Nevada State Public Health Laboratory                                                                                                                                                                               | Nevada State Public Health Laboratory                                                               | Richard Tillet, Joel R. Sevinsky, Paul Hartley, Heather Kerwin, David Jackson, Subhash C. Verma, Cyprian Rossetto, Andrew Gorzalski, Chris Laverdure, Natalie Crawford, Stephanie Van Hooser, and Mark Pandori                                                                                                                                                                                                                                                                       |
| EPI_ISL_515525                                                                                                                                                                                                                                                                                                                                                 | National Influenza Center - Instituto Adolfo Lutz                                                                                                                                                                   | Instituto Adolfo Lutz, Interdisciplinary Procedures Center, Strategic Laboratory                    | Claudio Tavares Sacchi, Claudia Regina Gonçalves, Erica Valessa Ramos Gomes                                                                                                                                                                                                                                                                                                                                                                                                          |
| EPI_ISL_515698, EPI_ISL_515745                                                                                                                                                                                                                                                                                                                                 | NHLS-IALCH                                                                                                                                                                                                          | KRISP, KZN Research Innovation and Sequencing Platform                                              | Giandhari J, Pillay S, Lessells R, Mdlalose K, York D, Khan S, Tegally H, Wilkinson E, de Oliveira T                                                                                                                                                                                                                                                                                                                                                                                 |
| EPI_ISL_523959                                                                                                                                                                                                                                                                                                                                                 | Pronto Socorro Municipal de Perus                                                                                                                                                                                   | Instituto Adolfo Lutz, Interdisciplinary Procedures Center, Strategic Laboratory                    | Claudio Tavares Sacchi, Claudia Regina Gonçalves, Erica Valessa Ramos Gomes                                                                                                                                                                                                                                                                                                                                                                                                          |
| EPI_ISL_525434                                                                                                                                                                                                                                                                                                                                                 | Institute of Microbiology, Universidad San Francisco de Quito                                                                                                                                                       | Institute of Microbiology, Universidad San Francisco de Quito                                       | Juan José Guadalupe, Monica Becerra-Wong, Belén Prado-Vivar, Sully Márquez, Bernardo Gutiérrez, Eulalia Pazmiño, Carolina Pacheco, Damaris Zandoya, Carlos Mena, Nabih Dahik, Verónica Barragán, Patricio Rojas-Silva, Gabriel Trueba, Michelle Grunauer, Paúl Cárdenas                                                                                                                                                                                                              |
| EPI_ISL_525578, EPI_ISL_525591, EPI_ISL_525602, EPI_ISL_525603, EPI_ISL_525607, EPI_ISL_525609, EPI_ISL_525611, EPI_ISL_525613, EPI_ISL_525618, EPI_ISL_525621, EPI_ISL_525625, EPI_ISL_525631, EPI_ISL_525639, EPI_ISL_525644, EPI_ISL_525650, EPI_ISL_525657, EPI_ISL_525666, EPI_ISL_525670, EPI_ISL_525673, EPI_ISL_525681, EPI_ISL_525682, EPI_ISL_525684 | see above                                                                                                                                                                                                           | Wadsworth Center, New York State Department of Health                                               | Kirsten St. George, Daryl M. Lamson, Sara Griesemer, Jonathan Plitnick, Navjot Singh, Matthew D. Shudt, Erica Lasek-Nesselquist                                                                                                                                                                                                                                                                                                                                                      |
| EPI_ISL_525951                                                                                                                                                                                                                                                                                                                                                 | OHSU Lab Services Molecular Microbiology Lab                                                                                                                                                                        | Oregon SARS-CoV-2 Genome Sequencing Center                                                          | Brendan L. O'Connell, Ruth V. Nichols, Alec J. Hirsch, Guang Fan, Daniel N. Streblow, William B. Messer, Andrew C. Adey, Benjamin N. Bimber, Brian J. O'Roak                                                                                                                                                                                                                                                                                                                         |
| EPI_ISL_527011, EPI_ISL_527031                                                                                                                                                                                                                                                                                                                                 | Area of Virology, Serology and Virology Division (SAVID), New South Wales Health Pathology Randwick                                                                                                                 | Area of Virology, Serology and Virology Division (SAVID), New South Wales Health Pathology Randwick | Rawlinson, W.                                                                                                                                                                                                                                                                                                                                                                                                                                                                        |
| EPI_ISL_527762, EPI_ISL_527769                                                                                                                                                                                                                                                                                                                                 | Connecticut State Department of Public Health                                                                                                                                                                       | Grubaugh Lab - Yale School of Public Health                                                         | Joseph Fauver, Mary Petrone, Chantal Vogels, Anderson Brito, Tara Alpert, Anthony Muyombwe, Jafar Razeq, Albert Ko, Nathan Grubaugh                                                                                                                                                                                                                                                                                                                                                  |
| EPI_ISL_527810, EPI_ISL_527811                                                                                                                                                                                                                                                                                                                                 | Institute of Microbiology, Universidad San Francisco de Quito                                                                                                                                                       | Institute of Microbiology, Universidad San Francisco de Quito                                       | Belén Prado-Vivar, Sully Márquez, Juan José Guadalupe, Monica Becerra-Wong, Bernardo Gutiérrez, Stephanie Arregui, Rene Bracho, Karina Barragan, Anita Garcia, Carlos Tobar, Verónica Barragán, Patricio Rojas-Silva, Gabriel Trueba, Michelle Grunauer, Paúl Cárdenas                                                                                                                                                                                                               |
| EPI_ISL_529033                                                                                                                                                                                                                                                                                                                                                 | Wadsworth Center, New York State Department of Health                                                                                                                                                               | Wadsworth Center, New York State Department of Health                                               | Kirsten St. George, Daryl M. Lamson, Sara Griesemer, Jonathan Plitnick, Navjot Singh, Matthew D. Shudt, Erica Lasek-Nesselquist                                                                                                                                                                                                                                                                                                                                                      |
| EPI_ISL_529140                                                                                                                                                                                                                                                                                                                                                 | Centro de Desenvolvimento Tecnológico em Saúde, Fundacao Oswaldo Cruz                                                                                                                                               | Centro de Desenvolvimento Tecnológico em Saúde, Fundacao Oswaldo Cruz                               | Souza, T.M., Fintelman-Rodrigues, N., De Paula, A.D., Saraiva, F.B., Ferreira, M.A., Sacramento, C.Q., Medeiros, M.A.                                                                                                                                                                                                                                                                                                                                                                |
| EPI_ISL_529216                                                                                                                                                                                                                                                                                                                                                 | Beijing Institute of Microbiology and Epidemiology                                                                                                                                                                  | Beijing Institute of Microbiology and Epidemiology                                                  | Fan, Hang; Qin, E.; Wu, Y.; Guo, Y.; Zhang, X.; Yong, Y.; Hou, J.; Xu, Z.; Mu, J.; Teng, Yue; Mi, Z.; Yang, R.; Song, Yajun.; Li, B.; Cui, Y.                                                                                                                                                                                                                                                                                                                                        |
| EPI_ISL_529297                                                                                                                                                                                                                                                                                                                                                 | Wales Specialist Virology Centre Sequencing lab: Pathogen Genomics Unit                                                                                                                                             | COVID-19 Genomics UK (COG-UK) Consortium                                                            | Catherine Moore, Johnathan Evans, Laura Gifford, Malorie Perry, Simon Cottrell, Angela Marchbank, Alec Birchley, Alexander Adams, Amy Gaskin, Bree Gatica-Wilcox, Jason Coombes, Joel Southgate, Lauren Gilbert, Lee Graham, Nicole Pacchiari, Sara Kumziene-Summerhayes, Sarah Taylor, Sophie Jones, Sara Rey, Matthew Bull, Joanne Watkins, Sally Corden, Tom Connor                                                                                                               |
| EPI_ISL_534225                                                                                                                                                                                                                                                                                                                                                 | Skanes universitetssjukhus Lund                                                                                                                                                                                     | The Public Health Agency of Sweden                                                                  | Anna-Malin Linde, Maria Lind Karlberg, Mattias Haukland, Reza Advani, Olov Svartstrom, Oskar Karlsson Lindsjo, Sandra Broddesson, Petra Edquist, Mia Brytting, Anna Risberg, Karin Tegmark-Wisell                                                                                                                                                                                                                                                                                    |
| EPI_ISL_534256                                                                                                                                                                                                                                                                                                                                                 | Klinisk mikrobiologi, Laboratoriemedicin Gavleborg                                                                                                                                                                  | The Public Health Agency of Sweden                                                                  | Anna-Malin Linde, Maria Lind Karlberg, Mattias Haukland, Reza Advani, Olov Svartstrom, Oskar Karlsson Lindsjo, Sandra Broddesson, Petra Edquist, Mia Brytting, Anna Risberg, Karin Tegmark-Wisell                                                                                                                                                                                                                                                                                    |
| EPI_ISL_535417, EPI_ISL_535525                                                                                                                                                                                                                                                                                                                                 | NHLS-IALCH                                                                                                                                                                                                          | KRISP, KZN Research Innovation and Sequencing Platform                                              | Giandhari J, Pillay S, Lessells R, Mdlalose K, York D, Khan S, Tegally H, Wilkinson E, de Oliveira T                                                                                                                                                                                                                                                                                                                                                                                 |

|                                                                                |                                                                                             |                                                                                                                      |                                                                                                                                                                                                                                                                                                                                                                                                                                                                                                                                                                                                          |
|--------------------------------------------------------------------------------|---------------------------------------------------------------------------------------------|----------------------------------------------------------------------------------------------------------------------|----------------------------------------------------------------------------------------------------------------------------------------------------------------------------------------------------------------------------------------------------------------------------------------------------------------------------------------------------------------------------------------------------------------------------------------------------------------------------------------------------------------------------------------------------------------------------------------------------------|
| EPI_ISL_536099                                                                 | Hôpital Pierre-Boucher                                                                      | Laboratoire de santé publique du Québec                                                                              | Sandrine Moreira, Ioannis Ragoussis, Guillaume Bourque, Jesse Shapiro, Mark Lathrop and Michel Roger                                                                                                                                                                                                                                                                                                                                                                                                                                                                                                     |
| EPI_ISL_536477, EPI_ISL_536498, EPI_ISL_536502                                 | Instituto Nacional de Salud                                                                 | Laboratorio de Infecciones Respiratorias Agudas                                                                      | Eduardo Juscamayta Lopez, David Tarazona, Faviola Valdivia Guerrero, Nancy Rojas Serrano, Dennis Carhuarica, Lenin Maturrano Hernandez, Ronnie Gavilan Chavez                                                                                                                                                                                                                                                                                                                                                                                                                                            |
| EPI_ISL_537544                                                                 | UCLA Pathology Clinical Microbiology Lab                                                    | Kruglyak Lab                                                                                                         | Guo et al.                                                                                                                                                                                                                                                                                                                                                                                                                                                                                                                                                                                               |
| EPI_ISL_538343, EPI_ISL_538359, EPI_ISL_538368, EPI_ISL_538378, EPI_ISL_538381 | Kingston Health Sciences Centre / Queen's University                                        | Ontario Institute for Cancer Research                                                                                | Prameet M. Sheth, Calvin Sjaarda, Robert Colautti, Katya Douchant, Ilinca Lungu, Bernard Lam, Paul Krzyzanowski, Michael Laszloffy, Lawrence E Heisler, Richard de Borja, Jared T. Simpson                                                                                                                                                                                                                                                                                                                                                                                                               |
| EPI_ISL_539573                                                                 | Centre de Recherches Medicales de Lambarene (CERMEL)                                        | Department of Emerging Infectious Diseases, Institute of Tropical Medicine, Nagasaki University                      | Haruka Abe, Yuri Ushijima, Rodrigue Bikangu, Akim A. Adegnika, Bertrand Lell, Jiro Yasuda                                                                                                                                                                                                                                                                                                                                                                                                                                                                                                                |
| EPI_ISL_539719                                                                 | CSIR-Centre for Cellular and Molecular Biology                                              | CSIR-Centre for Cellular and Molecular Biology                                                                       | Payel Mukherjee, Sofia Banu, Priya Singh, Onkar Kulkarni, Dhiviya Vedagiri, Divya Gupta, Vishal Sah, Santosh Kumar Kuncha, Krishnan Harshnan, Archana Bharadwaj Siva, Karthik Bharadwaj Tallapaka, Shagufta Khan, Lamuk Zaveri, Nikhil Hajirnis, M Soujanya Reddy, Pratheusa Maccha, Namami Gaur, Sakshi Shambhavi, Tulasi Nagabandi, Purushotham Vodnala, Gokulan C G, Gunjan Purohit, Hanuman Tulashiram Kale, Pankaj Kumar, Prachand Issarapu, Rakesh K Mishra, Divya Tej Sowpati                                                                                                                     |
| EPI_ISL_539765                                                                 | CSIR-Centre for Cellular and Molecular Biology                                              | CSIR-Centre for Cellular and Molecular Biology                                                                       | Tulasi Nagabandi, Namami Gaur, Sakshi Shambhavi, Lamuk Zaveri, Shagufta Khan, Nikhil Hajirnis, M Soujanya Reddy, Pratheusa Maccha, Purushotham Vodnala, Payel Mukherjee, Sofia Banu, Priya Singh, Onkar Kulkarni, Dhiviya Vedagiri, Divya Gupta, Vishal Sah, Santosh Kumar Kuncha, Krishnan Harshnan, Archana Bharadwaj Siva, Karthik Bharadwaj Tallapaka, Kezia J Ann, Radhika Khandelwal, Roshan Maku Venkata, Shemin Mansuri, Sonu Uday, Rakesh K Mishra, Divya Tej Sowpati                                                                                                                           |
| EPI_ISL_539775                                                                 | CSIR-Centre for Cellular and Molecular Biology                                              | CSIR-Centre for Cellular and Molecular Biology                                                                       | Payel Mukherjee, Sofia Banu, Priya Singh, Onkar Kulkarni, Dhiviya Vedagiri, Divya Gupta, Vishal Sah, Santosh Kumar Kuncha, Krishnan Harshnan, Archana Bharadwaj Siva, Karthik Bharadwaj Tallapaka, Shagufta Khan, Lamuk Zaveri, Nikhil Hajirnis, M Soujanya Reddy, Pratheusa Maccha, Namami Gaur, Sakshi Shambhavi, Tulasi Nagabandi, Purushotham Vodnala, Gokulan C G, Gunjan Purohit, Hanuman Tulashiram Kale, Pankaj Kumar, Prachand Issarapu, Rakesh K Mishra, Divya Tej Sowpati                                                                                                                     |
| EPI_ISL_539785                                                                 | Institute of Microbiology, Universidad San Francisco de Quito                               | Institute of Microbiology, Universidad San Francisco de Quito                                                        | Andrea Macias, Belén Prado-Vivar, Sully Márquez, Juan José Guadalupe, Monica Becerra-Wong, Bernardo Gutiérrez, Verónica Barragán, Patricio Rojas-Silva, Gabriel Trueba, Michelle Grunauer, Paúl Cárdenas                                                                                                                                                                                                                                                                                                                                                                                                 |
| EPI_ISL_539789                                                                 | Institute of Microbiology, Universidad San Francisco de Quito                               | Institute of Microbiology, Universidad San Francisco de Quito                                                        | Belén Prado-Vivar, Sully Márquez, Juan José Guadalupe, Monica Becerra-Wong, Bernardo Gutiérrez, Ligia Briceño, Nabih Dahik, Verónica Barragán, Patricio Rojas-Silva, Gabriel Trueba, Michelle Grunauer, Paúl Cárdenas                                                                                                                                                                                                                                                                                                                                                                                    |
| EPI_ISL_541651                                                                 | Laboratory Diagnostic, Veterinary Specialized Institute Kraljevo                            | Laboratory Diagnostic, Veterinary Specialized Institute Kraljevo                                                     | Vidanovic,D., Tesovic,B., Knezevic,A., Jovanovic,T., Jankovic,M., Sekler,M., Banovic Djeri,B., Volkening,J., Afonso,C., Petrovic,T.                                                                                                                                                                                                                                                                                                                                                                                                                                                                      |
| EPI_ISL_541768                                                                 | Barts Health NHS Trust                                                                      | Wellcome Sanger Institute for the COVID-19 Genomics UK (COG-UK) consortium                                           | Teresa Cutino-Moguel, Mark Hopkins, Beatrix Kele, David Harrington and Alex Alderton, Roberto Amato, Sonia Goncalves, Ewan Harrison, David K. Jackson, Ian Johnston, Dominic Kwiatkowski, Cordelia Langford, John Sillitoe on behalf of the Wellcome Sanger Institute COVID-19 Surveillance Team                                                                                                                                                                                                                                                                                                         |
| EPI_ISL_542069                                                                 | New Mexico Department of Health Scientific Laboratory                                       | New Mexico Department of Health Scientific Laboratory                                                                | Ellie Johnson, Anastacia Griego-Fisher, D'Eldra Malone                                                                                                                                                                                                                                                                                                                                                                                                                                                                                                                                                   |
| EPI_ISL_551770, EPI_ISL_552494, EPI_ISL_552586                                 | Lighthouse Lab in Milton Keynes                                                             | Wellcome Sanger Institute for the COVID-19 Genomics UK (COG-UK) consortium                                           | The Lighthouse Lab in Milton Keynes and Alex Alderton, Roberto Amato, Sonia Goncalves, Ewan Harrison, David K. Jackson, Ian Johnston, Dominic Kwiatkowski, Cordelia Langford, John Sillitoe on behalf of the Wellcome Sanger Institute COVID-19 Surveillance Team ( <a href="http://www.sanger.ac.uk/covid-team">http://www.sanger.ac.uk/covid-team</a> )                                                                                                                                                                                                                                                |
| EPI_ISL_555449, EPI_ISL_558917, EPI_ISL_559006                                 | Lighthouse Lab in Alderley Park                                                             | Wellcome Sanger Institute for the COVID-19 Genomics UK (COG-UK) consortium                                           | The Lighthouse Lab in Alderley Park and Alex Alderton, Roberto Amato, Sonia Goncalves, Ewan Harrison, David K. Jackson, Ian Johnston, Dominic Kwiatkowski, Cordelia Langford, John Sillitoe on behalf of the Wellcome Sanger Institute COVID-19 Surveillance Team                                                                                                                                                                                                                                                                                                                                        |
| EPI_ISL_560758                                                                 | Minnesota Department of Health, Public Health Laboratory                                    | Minnesota Department of Health, Public Health Laboratory                                                             | Matt Plumb, Jacob Garfin, and Xiong Wang                                                                                                                                                                                                                                                                                                                                                                                                                                                                                                                                                                 |
| EPI_ISL_566022                                                                 | Michigan Department of Health and Human Services, Bureau of Laboratories                    | Michigan Department of Health and Human Services, Bureau of Laboratories                                             | Blankenship HM, Riner D, Soehnlén MK                                                                                                                                                                                                                                                                                                                                                                                                                                                                                                                                                                     |
| EPI_ISL_568160                                                                 | Lighthouse Lab in Alderley Park                                                             | Wellcome Sanger Institute for the COVID-19 Genomics UK (COG-UK) consortium                                           | Jacquelyn Wynn, Mairead Hyland, The Lighthouse Lab in Alderley Park and Alex Alderton, Roberto Amato, Sonia Goncalves, Ewan Harrison, David K. Jackson, Ian Johnston, Dominic Kwiatkowski, Cordelia Langford, John Sillitoe on behalf of the Wellcome Sanger Institute COVID-19 Surveillance Team                                                                                                                                                                                                                                                                                                        |
| EPI_ISL_568545, EPI_ISL_568546                                                 | Laboratorio de Referencia Nacional de Virus Respiratorios, Instituto Nacional de Salud Peru | Laboratorio de Genómica Microbiana, Universidad Peruana Cayetano Heredia                                             | Pablo Tsukayama, Alejandra Dávila-Barclay, Luis González, Pedro E. Romero, Brenda Ayzanoa, Janet Huancachoque, Pool Marcos, Maribel Huaranga, Camila Castillo-Vilcahuaman, Guillermo Salvatierra                                                                                                                                                                                                                                                                                                                                                                                                         |
| EPI_ISL_568858                                                                 | KEMRI-Wellcome Trust Research Programme/KEMRI-CGMR-C Kilifi                                 | KEMRI-Wellcome Trust Research Programme/KEMRI-CGMR-C Kilifi                                                          | Githinji et al 2020                                                                                                                                                                                                                                                                                                                                                                                                                                                                                                                                                                                      |
| EPI_ISL_569908, EPI_ISL_569917                                                 | Innovative Genomics Institute, UC Berkeley                                                  | Innovative Genomics Institute, UC Berkeley                                                                           | Stacia Wyman, Haridha Shivram, Phil Frankino, Liana Lareau, Shana McDevitt, Justin Choi                                                                                                                                                                                                                                                                                                                                                                                                                                                                                                                  |
| EPI_ISL_571910                                                                 | Quest Diagnostics                                                                           | Quest Diagnostics                                                                                                    | Rosenthal,S.H., Gerasimova,A., Kagan,R.M., Anderson, B., Grover, D., Livingston, K.E., Hua, M., Liu Y., Shalhout, D.F., Owen, R., Lacbawan, F.                                                                                                                                                                                                                                                                                                                                                                                                                                                           |
| EPI_ISL_572234                                                                 | Virginia DCLS                                                                               | Virginia DCLS                                                                                                        | Virginia DCLS                                                                                                                                                                                                                                                                                                                                                                                                                                                                                                                                                                                            |
| EPI_ISL_577730                                                                 | NIV Influenza                                                                               | NIV Influenza                                                                                                        | Potdar V                                                                                                                                                                                                                                                                                                                                                                                                                                                                                                                                                                                                 |
| EPI_ISL_579061                                                                 | Canterbury Health Laboratories                                                              | Institute of Environmental Science and Research (ESR)                                                                | Xiaoyun Ren, Matt Storey, Nikki Freed, Muhammad Faisal, Jing Wang, Hermes Perez, Anja Werno, Antje van der Linden, Arlo Upton, Chris Mansell, David Hammer, Dragana Drinkovic, Gary McAuliffe, Hana Sofia Andersson, James Ussher, Jill Sherwood, Josh Freeman, Julia Howard, Juliet Elvy, Mary DeAlmeida, Matt Blakiston, Matthew Rogers, Max Bloomfield, Michael Addidle, Michelle Balm, Sally Roberts, Sarah Jefferies, Sharmini Muttaiyah, Susan Morpeth, Susan Taylor, Timothy Blackmore, Vani Sathyendran, Veronica Playle, Virginia Hope, Erasmus Smit, Lauren Jelly, Olin Silander, Joep de Ligt |
| EPI_ISL_580046, EPI_ISL_580265                                                 | Lighthouse Lab in Alderley Park                                                             | Wellcome Sanger Institute for the COVID-19 Genomics UK (COG-UK) consortium                                           | Jacquelyn Wynn, Mairead Hyland, The Lighthouse Lab in Alderley Park and Alex Alderton, Roberto Amato, Sonia Goncalves, Ewan Harrison, David K. Jackson, Ian Johnston, Dominic Kwiatkowski, Cordelia Langford, John Sillitoe on behalf of the Wellcome Sanger Institute COVID-19 Surveillance Team                                                                                                                                                                                                                                                                                                        |
| EPI_ISL_582951                                                                 | County of Santa Clara Public Health Department                                              | Chan-Zuckerberg Biohub                                                                                               | CZB Cliahub Consortium                                                                                                                                                                                                                                                                                                                                                                                                                                                                                                                                                                                   |
| EPI_ISL_583323                                                                 | University of Michigan Clinical Microbiology Laboratory                                     | Lauring Lab, University of Michigan, Department of Microbiology and Immunology                                       | Valesano                                                                                                                                                                                                                                                                                                                                                                                                                                                                                                                                                                                                 |
| EPI_ISL_586535                                                                 | General Hospital, Chhotaudepur                                                              | Gujarat Biotechnology Research Centre                                                                                | Nidhi Patel, Nitin Savaliya, Raghawendra Kumar, Dinesh Kumar, Zuber Saiyed, Komal Patel, Labdhi Pandya, Afzal Ansari, Nikha Trivedi, Apurvasinh Puvar, Janvi Raval, Zarna Patel, Monika Gandhi, Pinal Trivedi, Yogesh Parmar, Arti Thakur, Dharak Pandya, Maharshi Pandya, R D Dixit, A M Kadri, Harsh Bakshi, Chaitanya Joshi, Madhvi Joshi                                                                                                                                                                                                                                                             |
| EPI_ISL_590707                                                                 | University of Michigan Clinical Microbiology Laboratory                                     | Lauring Lab, University of Michigan, Department of Microbiology and Immunology                                       | Valesano                                                                                                                                                                                                                                                                                                                                                                                                                                                                                                                                                                                                 |
| EPI_ISL_593739                                                                 | South Eastern Area Laboratory Services (SEALS)                                              | NSW Health Pathology - Institute of Clinical Pathology and Medical Research; Westmead Hospital; University of Sydney | CIDM-PH et al.                                                                                                                                                                                                                                                                                                                                                                                                                                                                                                                                                                                           |
| EPI_ISL_594353                                                                 | Florida Bureau of Public Health Laboratories                                                | Florida Bureau of Public Health Laboratories                                                                         | Sarah Schmedes, Jason Blanton                                                                                                                                                                                                                                                                                                                                                                                                                                                                                                                                                                            |
| EPI_ISL_597618, EPI_ISL_597757                                                 | Lighthouse Lab in Alderley Park                                                             | Wellcome Sanger Institute for the COVID-19 Genomics UK (COG-UK) consortium                                           | Jacquelyn Wynn, Mairead Hyland, The Lighthouse Lab in Alderley Park and Alex Alderton, Roberto Amato, Sonia Goncalves, Ewan Harrison, David K. Jackson, Ian Johnston, Dominic Kwiatkowski, Cordelia Langford, John Sillitoe on behalf of the Wellcome Sanger Institute COVID-19 Surveillance Team ( <a href="http://www.sanger.ac.uk/covid-team">http://www.sanger.ac.uk/covid-team</a> )                                                                                                                                                                                                                |
| EPI_ISL_600480                                                                 | Institute of Epidemiology Disease Control And Research                                      | Institute for Developing Science and Health Initiatives                                                              | Lauren Cowley, Mokibul Hassan Afrad, Sadia Isfat Ara Rahman, Md. Mahfuz-Al-mamun, Firdausi Qadri, Tahmina Shirin                                                                                                                                                                                                                                                                                                                                                                                                                                                                                         |
| EPI_ISL_602671, EPI_ISL_602674, EPI_ISL_602677                                 | NHLS-IALCH                                                                                  | KRISP, KZN Research Innovation and Sequencing Platform                                                               | Gianhari J, Pillay S, Lessells R, Mdlalose K, York D, Khan S, Tegally H, Wilkinson E, de Oliveira T                                                                                                                                                                                                                                                                                                                                                                                                                                                                                                      |



|                                                                                                                |                                                                                                                                                        |                                                                                                                      |                                                                                                                                                                                                                                                                                                                                                                                                                                                                                                                                                                                                         |
|----------------------------------------------------------------------------------------------------------------|--------------------------------------------------------------------------------------------------------------------------------------------------------|----------------------------------------------------------------------------------------------------------------------|---------------------------------------------------------------------------------------------------------------------------------------------------------------------------------------------------------------------------------------------------------------------------------------------------------------------------------------------------------------------------------------------------------------------------------------------------------------------------------------------------------------------------------------------------------------------------------------------------------|
| EPI_ISL_602977, EPI_ISL_602981                                                                                 | Minnesota Department of Health, Public Health Laboratory                                                                                               | Minnesota Department of Health, Public Health Laboratory                                                             | Matt Plumb, Jacob Garfin, Alexandra Lorentz, and Xiong Wang                                                                                                                                                                                                                                                                                                                                                                                                                                                                                                                                             |
| EPI_ISL_606128                                                                                                 | Lighthouse Lab in Alderley Park                                                                                                                        | Wellcome Sanger Institute for the COVID-19 Genomics UK (COG-UK) consortium                                           | Jacquelyn Wynn, Mairead Hyland, The Lighthouse Lab in Alderley Park and Alex Alderton, Roberto Amato, Sonia Goncalves, Ewan Harrison, David K. Jackson, Ian Johnston, Dominic Kwiatkowski, Cordelia Langford, John Sillitoe on behalf of the Wellcome Sanger Institute COVID-19 Surveillance Team                                                                                                                                                                                                                                                                                                       |
| EPI_ISL_608558                                                                                                 | Lighthouse Lab in Cambridge                                                                                                                            | Wellcome Sanger Institute for the COVID-19 Genomics UK (COG-UK) consortium                                           | Rob Howes, The Lighthouse Lab in Cambridge and Alex Alderton, Roberto Amato, Sonia Goncalves, Ewan Harrison, David K. Jackson, Ian Johnston, Dominic Kwiatkowski, Cordelia Langford, John Sillitoe on behalf of the Wellcome Sanger Institute COVID-19 Surveillance Team                                                                                                                                                                                                                                                                                                                                |
| EPI_ISL_610245                                                                                                 | Virology, National Institute for Biological Standards and Control                                                                                      | Virology, National Institute for Biological Standards and Control                                                    | Mee,E.T., Bentley,E., Routley,S., Mate,R., Fritzsche,M. and Mattiuzzo,G.                                                                                                                                                                                                                                                                                                                                                                                                                                                                                                                                |
| EPI_ISL_610347                                                                                                 | Lighthouse Lab in Alderley Park                                                                                                                        | Wellcome Sanger Institute for the COVID-19 Genomics UK (COG-UK) consortium                                           | Jacquelyn Wynn, Mairead Hyland, The Lighthouse Lab in Alderley Park and Alex Alderton, Roberto Amato, Sonia Goncalves, Ewan Harrison, David K. Jackson, Ian Johnston, Dominic Kwiatkowski, Cordelia Langford, John Sillitoe on behalf of the Wellcome Sanger Institute COVID-19 Surveillance Team                                                                                                                                                                                                                                                                                                       |
| EPI_ISL_613524                                                                                                 | Public Health Laboratory - Infectious Disease Lab, Minnesota Department of Health Infectious Disease Laboratory Submission Group                       | Minnesota Department of Health, Public Health Laboratory                                                             | Plumb,M., Garfin,J., Lorentz,A., Wang,X.                                                                                                                                                                                                                                                                                                                                                                                                                                                                                                                                                                |
| EPI_ISL_618562                                                                                                 | Department of Virus and Microbiological Special Diagnostics, Statens Serum Institut, Denmark                                                           | Albertsen lab, Department of Chemistry and Bioscience, Aalborg University, Denmark                                   | Danish Covid-19 Genome Consortia                                                                                                                                                                                                                                                                                                                                                                                                                                                                                                                                                                        |
| EPI_ISL_622808                                                                                                 | Canterbury Health Laboratories                                                                                                                         | Institute of Environmental Science and Research (ESR)                                                                | Xiaoyun Ren, Matt Storey, Nikki Freed, Muhammad Faisal, Jing Wang, Hermes Perez, Anja Werno, Antje van der Linden, Arlo Upton, Chris Mansell, David Hammer, Dragana Drinkovic, Gary McAuliffe, Hana Sofia Andersson, James Ussher, Jill Sherwood, Josh Freeman, Julia Howard, Juliet Ely, Mary DeAlmeida, Matt Blakiston, Matthew Rogers, Max Bloomfield, Michael Addidle, Michelle Balm, Sally Roberts, Sarah Jefferies, Sharmini Muttaiyah, Susan Morpeth, Susan Taylor, Timothy Blackmore, Vani Sathyendran, Veronica Playle, Virginia Hope, Erasmus Smit, Lauren Jelly, Olin Silander, Joep de Ligt |
| EPI_ISL_622910                                                                                                 | National Institute for Communicable Diseases of the National Health Laboratory Service                                                                 | National Institute for Communicable Diseases of the National Health Laboratory Service                               | Allam M, Ismail A, Khumalo Z, Kwenda S, Mtshali P, Mnyameni F, Mohale T, Subramoney K, Bhiman JN                                                                                                                                                                                                                                                                                                                                                                                                                                                                                                        |
| EPI_ISL_623140, EPI_ISL_623142                                                                                 | Laboratorio de Virologia Molecular / UFRJ                                                                                                              | Bioinformatics Laboratory / LNCC                                                                                     | Carolina M Voloch, Ronaldo S Francisco Jr, Luiz G P de Almeida, Otavio J. Brustolini, Cynthia C Cardoso, Alexandra L Gerber, Ana Paula de C Guimarães, Diana Mariani, Covid19-UFRJ Workgroup, Luís Cristóvão Pôrto, Renato S Aguiar, Terezinha M P P Castilheiras, Orlando C. Ferreira, Amílcar Tanuri, Ana Tereza R de Vasconcelos                                                                                                                                                                                                                                                                     |
| EPI_ISL_623456                                                                                                 | Lighthouse Lab in Milton Keynes                                                                                                                        | Wellcome Sanger Institute for the COVID-19 Genomics UK (COG-UK) Consortium                                           | The Lighthouse Lab in Milton Keynes and Alex Alderton, Roberto Amato, Sonia Goncalves, Ewan Harrison, David K. Jackson, Ian Johnston, Dominic Kwiatkowski, Cordelia Langford, John Sillitoe on behalf of the Wellcome Sanger Institute COVID-19 Surveillance Team ( <a href="http://www.sanger.ac.uk/covid-team">http://www.sanger.ac.uk/covid-team</a> )                                                                                                                                                                                                                                               |
| EPI_ISL_624019                                                                                                 | Lighthouse Lab in Glasgow                                                                                                                              | Wellcome Sanger Institute for the COVID-19 Genomics UK (COG-UK) consortium                                           | Harper VanSteenhouse, Yumi Kasai, David Gray, Carol Clugston, Anna Dominiczak and Alex Alderton, Roberto Amato, Sonia Goncalves, Ewan Harrison, David K. Jackson, Ian Johnston, Dominic Kwiatkowski, Cordelia Langford, John Sillitoe on behalf of the Wellcome Sanger Institute COVID-19 Surveillance Team ( <a href="http://www.sanger.ac.uk/covid-team">http://www.sanger.ac.uk/covid-team</a> )                                                                                                                                                                                                     |
| EPI_ISL_625544, EPI_ISL_625612                                                                                 | Alameda County Public Health Lab                                                                                                                       | Chan-Zuckerberg Biohub                                                                                               | CZB Ciliahub Consortium                                                                                                                                                                                                                                                                                                                                                                                                                                                                                                                                                                                 |
| EPI_ISL_626554                                                                                                 | Laboratorio de Biología Molecular, Facultad de Medicina, Universidad de Atacama, Copiapo, Chile/ FONDAP CRG, Universidad Andrés Bello, Santiago, Chile | Center for Mathematical Modeling and Center for Genome Regulation. Santiago, Chile                                   | Echeverría C, Manríquez R, Bastias M, Sanhueza D, Travisany D, Allende ML, Maass A, González M, Montecino, M, Orellana A, Castro E, Meneses C.                                                                                                                                                                                                                                                                                                                                                                                                                                                          |
| EPI_ISL_629083                                                                                                 | Laboratoire du Centre Hospitalier Annecy Genevois                                                                                                      | CNR Virus des Infections Respiratoires - France SUD                                                                  | Antonin Bal, Gregory Destras, Gwendolyne Burfin, Hadrien Règue, Quentin Semanas, Martine Valette, Bruno Lina, Héliène Petitprez, Bruno Chanzy, Laurence Josset                                                                                                                                                                                                                                                                                                                                                                                                                                          |
| EPI_ISL_634724                                                                                                 | Lighthouse Lab in Glasgow                                                                                                                              | Wellcome Sanger Institute for the COVID-19 Genomics UK (COG-UK) consortium                                           | Harper VanSteenhouse, Yumi Kasai, David Gray, Carol Clugston, Anna Dominiczak and Alex Alderton, Roberto Amato, Sonia Goncalves, Ewan Harrison, David K. Jackson, Ian Johnston, Dominic Kwiatkowski, Cordelia Langford, John Sillitoe on behalf of the Wellcome Sanger Institute COVID-19 Surveillance Team ( <a href="http://www.sanger.ac.uk/covid-team">http://www.sanger.ac.uk/covid-team</a> )                                                                                                                                                                                                     |
| EPI_ISL_634860                                                                                                 | Minnesota Department of Health, Public Health Laboratory                                                                                               | Minnesota Department of Health, Public Health Laboratory                                                             | Matt Plumb, Jacob Garfin, Alexandra Lorentz, and Xiong Wang                                                                                                                                                                                                                                                                                                                                                                                                                                                                                                                                             |
| EPI_ISL_635003                                                                                                 | National Health Laboratory Service - Inkosi Albert Luthuli Central Hospital (NHLS-IALCH)                                                               | KRISP, KZN Research Innovation and Sequencing Platform                                                               | Giandhari J, Pillay S, Lessells R, Mdlalose K, York D, Khan S, Tegally H, Wilkinson E, de Oliveira T                                                                                                                                                                                                                                                                                                                                                                                                                                                                                                    |
| EPI_ISL_635845, EPI_ISL_635848, EPI_ISL_635849, EPI_ISL_635850, EPI_ISL_635851, EPI_ISL_635852, EPI_ISL_635855 | San Diego County Public Health Laboratory                                                                                                              | Andersen lab at Scripps Research                                                                                     | SEARCH Alliance San Diego with Tracy Basler, Jovan Shephard, Brett Austin                                                                                                                                                                                                                                                                                                                                                                                                                                                                                                                               |
| EPI_ISL_639737                                                                                                 | South Eastern Area Laboratory Services (SEALS)                                                                                                         | NSW Health Pathology - Institute of Clinical Pathology and Medical Research; Westmead Hospital; University of Sydney | CIDM-PH et al.                                                                                                                                                                                                                                                                                                                                                                                                                                                                                                                                                                                          |
| EPI_ISL_644565                                                                                                 | Laboratory Diagnostic, Veterinary Specialized Institute Kraljevo                                                                                       | Laboratory Diagnostic, Veterinary Specialized Institute Kraljevo                                                     | Vidanovic,D., Tesovic,B., Knezevic,A., Jovanovic,T., Jankovic,M., Sekler,M., Banovic Djeri,B., Petrovic,T., Volkening,J., Afonso,C.                                                                                                                                                                                                                                                                                                                                                                                                                                                                     |
| EPI_ISL_644602                                                                                                 | New Mexico Department of Health Scientific Laboratory                                                                                                  | New Mexico Department of Health Scientific Laboratory                                                                | Ellie Johnson, Anastacia Griego-Fisher, D'Eldra Malone                                                                                                                                                                                                                                                                                                                                                                                                                                                                                                                                                  |
| EPI_ISL_648169                                                                                                 | Klinisk mikrobiologi NAL Trollhattan                                                                                                                   | The Public Health Agency of Sweden                                                                                   | Anna-Malin Linde, Maria Lind Karlberg, Mattias Haukland, Reza Advani, Olov Svartstrom, Oskar Karlsson Lindsjo, Sandra Broddesson, Petra Edquist, Mia Brytting, Anna Risberg, Karin Tegmark-Wisell                                                                                                                                                                                                                                                                                                                                                                                                       |
| EPI_ISL_648180                                                                                                 | The Public Health Agency of Sweden                                                                                                                     | The Public Health Agency of Sweden                                                                                   | Anna-Malin Linde, Maria Lind Karlberg, Mattias Haukland, Reza Advani, Olov Svartstrom, Oskar Karlsson Lindsjo, Sandra Broddesson, Petra Edquist, Mia Brytting, Anna Risberg, Karin Tegmark-Wisell                                                                                                                                                                                                                                                                                                                                                                                                       |
| EPI_ISL_648393, EPI_ISL_648448, EPI_ISL_648449                                                                 | Santa Clara County Public Health Laboratory                                                                                                            | Chan-Zuckerberg Biohub                                                                                               | CZB Ciliahub Consortium                                                                                                                                                                                                                                                                                                                                                                                                                                                                                                                                                                                 |
| EPI_ISL_649088, EPI_ISL_649092                                                                                 | Israel Central Virology laboratory                                                                                                                     | Israel Central Virology laboratory                                                                                   | Neta Zuckerman, Efrat Dahan Bucris, Oran Erster, Ella Mendelson, Michal Mandelboim                                                                                                                                                                                                                                                                                                                                                                                                                                                                                                                      |
| EPI_ISL_653299                                                                                                 | Florida Bureau of Public Health Laboratories                                                                                                           | Florida Bureau of Public Health Laboratories                                                                         | Sarah Schmedes, Jason Blanton                                                                                                                                                                                                                                                                                                                                                                                                                                                                                                                                                                           |
| EPI_ISL_653757                                                                                                 | Instituto Nacional de Salud, Bogotá, Colombia                                                                                                          | Instituto Nacional de Salud, Bogotá, Colombia                                                                        | Katherine Laiton-Donato, Diego A. Álvarez-Díaz, Carlos Franco-Muñoz, Mauricio Pacheco-Montealegre, Jonathan Reales, Diego Andrés Prada, José A. Usme-Ciro, Zulma M. Cucunubá, Christian Julian Villabona-Arenas, Liz Villabona-Arenas, Sussy Echeverría, Astrid C. Flórez, Carolina Ferro, Diana Marcela Walters-Acero, Franklin Prieto, Carlos Andrés Durán, Martha Lucia Ospina Martínez, Marcela Mercado-Reyes                                                                                                                                                                                       |
| EPI_ISL_658502, EPI_ISL_658510, EPI_ISL_658658, EPI_ISL_658733                                                 | Lighthouse Lab in Glasgow                                                                                                                              | Wellcome Sanger Institute for the COVID-19 Genomics UK (COG-UK) Consortium                                           | Harper VanSteenhouse, Yumi Kasai, David Gray, Carol Clugston, Anna Dominiczak and Alex Alderton, Roberto Amato, Sonia Goncalves, Ewan Harrison, David K. Jackson, Ian Johnston, Dominic Kwiatkowski, Cordelia Langford, John Sillitoe on behalf of the Wellcome Sanger Institute COVID-19 Surveillance Team                                                                                                                                                                                                                                                                                             |
| EPI_ISL_660379                                                                                                 | Orebro klinisk mikrobiologi                                                                                                                            | The Public Health Agency of Sweden                                                                                   | Anna-Malin Linde, Maria Lind Karlberg, Mattias Haukland, Reza Advani, Olov Svartstrom, Oskar Karlsson Lindsjo, Sandra Broddesson, Petra Edquist, Mia Brytting, Anna Risberg, Karin Tegmark-Wisell                                                                                                                                                                                                                                                                                                                                                                                                       |
| EPI_ISL_660385, EPI_ISL_660392                                                                                 | Klinsisk mikrobiologi Linköping                                                                                                                        | The Public Health Agency of Sweden                                                                                   | Anna-Malin Linde, Maria Lind Karlberg, Mattias Haukland, Reza Advani, Olov Svartstrom, Oskar Karlsson Lindsjo, Sandra Broddesson, Petra Edquist, Mia Brytting, Anna Risberg, Karin Tegmark-Wisell                                                                                                                                                                                                                                                                                                                                                                                                       |
| EPI_ISL_660419                                                                                                 | Klinisk mikrobiologi                                                                                                                                   | The Public Health Agency of Sweden                                                                                   | Anna-Malin Linde, Maria Lind Karlberg, Mattias Haukland, Reza Advani, Olov Svartstrom, Oskar Karlsson Lindsjo, Sandra Broddesson, Petra Edquist, Mia Brytting, Anna Risberg, Karin Tegmark-Wisell                                                                                                                                                                                                                                                                                                                                                                                                       |
| EPI_ISL_660450                                                                                                 | Laboratoire de Microbiologie CHU Sourou Sanou                                                                                                          | Centre Muraz                                                                                                         | Abdoul-Salam Ouedraogo, Yacouba Sawadogo, Essia Belarbi, Grit Schubert, Fabian Leendertz, Arsène Zongo, Soumeya Ouangraoua, Zekiba Tarnagda,                                                                                                                                                                                                                                                                                                                                                                                                                                                            |

| Lassana Sangaré, Halidou Tinto                                                                                                                                                                                                                                                                                                                                                                                                                                                                                                                                                                                                                                                                                                                                                                                                                                                                                                                                                                                                                                                                                                                                                                                                                                                                                                                                                                                                                                                                                                                                                                                                                                                                                                                                                                                                                                                                                                                                                                                                                                                                                                                                                                                                                                                                                                                                                                                                                                                                                                                                                                                                                                                                                                                                                                                                                                                                                                                                                                                                                                                                                                                                                                                                                                                                                                                                                                                                                                                                                                                                                                                                                                                                                                                                                                                                                                                                                                                                                                                                                                                                                                                                                                                                                                                                                                                                                                                                                                                                                                                                                                                                                                                                                                                                                                                                                                                                                                                                                                                                                                                                                                                                                                                                                                                                                                                                                                                                                                                                                                                                                                                                                                                                                                                                                 |                                                                                                                                                                                  |                                                                                                                                   |                                                                                                                                                                                                                                                                                                                                                                                                                                                                                                                                                                                                         |
|--------------------------------------------------------------------------------------------------------------------------------------------------------------------------------------------------------------------------------------------------------------------------------------------------------------------------------------------------------------------------------------------------------------------------------------------------------------------------------------------------------------------------------------------------------------------------------------------------------------------------------------------------------------------------------------------------------------------------------------------------------------------------------------------------------------------------------------------------------------------------------------------------------------------------------------------------------------------------------------------------------------------------------------------------------------------------------------------------------------------------------------------------------------------------------------------------------------------------------------------------------------------------------------------------------------------------------------------------------------------------------------------------------------------------------------------------------------------------------------------------------------------------------------------------------------------------------------------------------------------------------------------------------------------------------------------------------------------------------------------------------------------------------------------------------------------------------------------------------------------------------------------------------------------------------------------------------------------------------------------------------------------------------------------------------------------------------------------------------------------------------------------------------------------------------------------------------------------------------------------------------------------------------------------------------------------------------------------------------------------------------------------------------------------------------------------------------------------------------------------------------------------------------------------------------------------------------------------------------------------------------------------------------------------------------------------------------------------------------------------------------------------------------------------------------------------------------------------------------------------------------------------------------------------------------------------------------------------------------------------------------------------------------------------------------------------------------------------------------------------------------------------------------------------------------------------------------------------------------------------------------------------------------------------------------------------------------------------------------------------------------------------------------------------------------------------------------------------------------------------------------------------------------------------------------------------------------------------------------------------------------------------------------------------------------------------------------------------------------------------------------------------------------------------------------------------------------------------------------------------------------------------------------------------------------------------------------------------------------------------------------------------------------------------------------------------------------------------------------------------------------------------------------------------------------------------------------------------------------------------------------------------------------------------------------------------------------------------------------------------------------------------------------------------------------------------------------------------------------------------------------------------------------------------------------------------------------------------------------------------------------------------------------------------------------------------------------------------------------------------------------------------------------------------------------------------------------------------------------------------------------------------------------------------------------------------------------------------------------------------------------------------------------------------------------------------------------------------------------------------------------------------------------------------------------------------------------------------------------------------------------------------------------------------------------------------------------------------------------------------------------------------------------------------------------------------------------------------------------------------------------------------------------------------------------------------------------------------------------------------------------------------------------------------------------------------------------------------------------------------------------------------------------|----------------------------------------------------------------------------------------------------------------------------------------------------------------------------------|-----------------------------------------------------------------------------------------------------------------------------------|---------------------------------------------------------------------------------------------------------------------------------------------------------------------------------------------------------------------------------------------------------------------------------------------------------------------------------------------------------------------------------------------------------------------------------------------------------------------------------------------------------------------------------------------------------------------------------------------------------|
| EPI_ISL_660537                                                                                                                                                                                                                                                                                                                                                                                                                                                                                                                                                                                                                                                                                                                                                                                                                                                                                                                                                                                                                                                                                                                                                                                                                                                                                                                                                                                                                                                                                                                                                                                                                                                                                                                                                                                                                                                                                                                                                                                                                                                                                                                                                                                                                                                                                                                                                                                                                                                                                                                                                                                                                                                                                                                                                                                                                                                                                                                                                                                                                                                                                                                                                                                                                                                                                                                                                                                                                                                                                                                                                                                                                                                                                                                                                                                                                                                                                                                                                                                                                                                                                                                                                                                                                                                                                                                                                                                                                                                                                                                                                                                                                                                                                                                                                                                                                                                                                                                                                                                                                                                                                                                                                                                                                                                                                                                                                                                                                                                                                                                                                                                                                                                                                                                                                                 | Institute of Microbiology, Universidad San Francisco de Quito                                                                                                                    | Institute of Microbiology, Universidad San Francisco de Quito                                                                     | Sully Márquez, Belén Prado-Vivar, Juan José Guadalupe, Monica Becerra-Wong, Bernardo Gutiérrez, Hermelinda Paguay, Alexandra Tino, Jorge Montaño, Verónica Barragán, Patricio Rojas-Silva, Gabriel Trueba, Michelle Grunauer, Paúl Cárdenas                                                                                                                                                                                                                                                                                                                                                             |
| EPI_ISL_660969, EPI_ISL_661140                                                                                                                                                                                                                                                                                                                                                                                                                                                                                                                                                                                                                                                                                                                                                                                                                                                                                                                                                                                                                                                                                                                                                                                                                                                                                                                                                                                                                                                                                                                                                                                                                                                                                                                                                                                                                                                                                                                                                                                                                                                                                                                                                                                                                                                                                                                                                                                                                                                                                                                                                                                                                                                                                                                                                                                                                                                                                                                                                                                                                                                                                                                                                                                                                                                                                                                                                                                                                                                                                                                                                                                                                                                                                                                                                                                                                                                                                                                                                                                                                                                                                                                                                                                                                                                                                                                                                                                                                                                                                                                                                                                                                                                                                                                                                                                                                                                                                                                                                                                                                                                                                                                                                                                                                                                                                                                                                                                                                                                                                                                                                                                                                                                                                                                                                 | Gundersen Molecular Diagnostics Laboratory                                                                                                                                       | Kabara Cancer Research Institute                                                                                                  | Craig S. Richmond, Paraic A. Kenny                                                                                                                                                                                                                                                                                                                                                                                                                                                                                                                                                                      |
| EPI_ISL_661184                                                                                                                                                                                                                                                                                                                                                                                                                                                                                                                                                                                                                                                                                                                                                                                                                                                                                                                                                                                                                                                                                                                                                                                                                                                                                                                                                                                                                                                                                                                                                                                                                                                                                                                                                                                                                                                                                                                                                                                                                                                                                                                                                                                                                                                                                                                                                                                                                                                                                                                                                                                                                                                                                                                                                                                                                                                                                                                                                                                                                                                                                                                                                                                                                                                                                                                                                                                                                                                                                                                                                                                                                                                                                                                                                                                                                                                                                                                                                                                                                                                                                                                                                                                                                                                                                                                                                                                                                                                                                                                                                                                                                                                                                                                                                                                                                                                                                                                                                                                                                                                                                                                                                                                                                                                                                                                                                                                                                                                                                                                                                                                                                                                                                                                                                                 | Scientific Veterinary Institute Novi Sad                                                                                                                                         | Veterinary Specialized Institute "Kraljevo", Serbia                                                                               | Vidanovic,D., Tesovic,B., Knezevic,A., Jovanovic,T., Jankovic,M., Sekler,M., Banovic Djeri,B., Petrovic,T., Volkening,J., Afonso,C.                                                                                                                                                                                                                                                                                                                                                                                                                                                                     |
| EPI_ISL_661260                                                                                                                                                                                                                                                                                                                                                                                                                                                                                                                                                                                                                                                                                                                                                                                                                                                                                                                                                                                                                                                                                                                                                                                                                                                                                                                                                                                                                                                                                                                                                                                                                                                                                                                                                                                                                                                                                                                                                                                                                                                                                                                                                                                                                                                                                                                                                                                                                                                                                                                                                                                                                                                                                                                                                                                                                                                                                                                                                                                                                                                                                                                                                                                                                                                                                                                                                                                                                                                                                                                                                                                                                                                                                                                                                                                                                                                                                                                                                                                                                                                                                                                                                                                                                                                                                                                                                                                                                                                                                                                                                                                                                                                                                                                                                                                                                                                                                                                                                                                                                                                                                                                                                                                                                                                                                                                                                                                                                                                                                                                                                                                                                                                                                                                                                                 | Canterbury Health Laboratories                                                                                                                                                   | Institute of Environmental Science and Research (ESR)                                                                             | Xiaoyun Ren, Matt Storey, Nikki Freed, Muhammad Faisal, Jing Wang, Hermes Perez, Anja Werno, Antje van der Linden, Arlo Upton, Chris Mansell, David Hammer, Dragana Drinkovic, Gary McAuliffe, Hana Sofia Andersson, James Ussher, Jill Sherwood, Josh Freeman, Julia Howard, Juliet Ely, Mary DeAlmeida, Matt Blakiston, Matthew Rogers, Max Bloomfield, Michael Addidle, Michelle Balm, Sally Roberts, Sarah Jefferies, Sharmini Muttayyah, Susan Morpeth, Susan Taylor, Timothy Blackmore, Vani Sathyendran, Veronica Playle, Virginia Hope, Erasmus Smit, Lauren Jelly, Olin Silander, Joep de Ligt |
| EPI_ISL_666636                                                                                                                                                                                                                                                                                                                                                                                                                                                                                                                                                                                                                                                                                                                                                                                                                                                                                                                                                                                                                                                                                                                                                                                                                                                                                                                                                                                                                                                                                                                                                                                                                                                                                                                                                                                                                                                                                                                                                                                                                                                                                                                                                                                                                                                                                                                                                                                                                                                                                                                                                                                                                                                                                                                                                                                                                                                                                                                                                                                                                                                                                                                                                                                                                                                                                                                                                                                                                                                                                                                                                                                                                                                                                                                                                                                                                                                                                                                                                                                                                                                                                                                                                                                                                                                                                                                                                                                                                                                                                                                                                                                                                                                                                                                                                                                                                                                                                                                                                                                                                                                                                                                                                                                                                                                                                                                                                                                                                                                                                                                                                                                                                                                                                                                                                                 | ZOTZ KLIMAS MVZ Düsseldorf-Centrum GbR ÜBAG für Labormedizin, Genetik, Zytologie, Pathologie                                                                                     | Center of Medical Microbiology, Virology, and Hospital Hygiene, University of Dusseldorf                                          | Maximilian Damagnez, Alexander Dilthey, Ashley-Jane Duplessis, Patrick Finzer, Katrin Hoffmann, Torsten Houwaart, Lisanna Hülse, Malte Kohns Vasconcelos, Marek Korencak, Nadine Lübke, Jessica Nicolai, Klaus Pfeffer, Daniel StreLOW, Jörg Timm, Andreas Walker, Tobias Wienemann, Rainer Zotz                                                                                                                                                                                                                                                                                                        |
| EPI_ISL_676584                                                                                                                                                                                                                                                                                                                                                                                                                                                                                                                                                                                                                                                                                                                                                                                                                                                                                                                                                                                                                                                                                                                                                                                                                                                                                                                                                                                                                                                                                                                                                                                                                                                                                                                                                                                                                                                                                                                                                                                                                                                                                                                                                                                                                                                                                                                                                                                                                                                                                                                                                                                                                                                                                                                                                                                                                                                                                                                                                                                                                                                                                                                                                                                                                                                                                                                                                                                                                                                                                                                                                                                                                                                                                                                                                                                                                                                                                                                                                                                                                                                                                                                                                                                                                                                                                                                                                                                                                                                                                                                                                                                                                                                                                                                                                                                                                                                                                                                                                                                                                                                                                                                                                                                                                                                                                                                                                                                                                                                                                                                                                                                                                                                                                                                                                                 | Scientific Veterinary Institute Novi Sad                                                                                                                                         | Veterinary Specialized Institute "Kraljevo", Serbia                                                                               | Vidanovic,D., Tesovic,B., Knezevic,A., Jovanovic,T., Jankovic,M., Sekler,M., Banovic Djeri,B., Petrovic,T., Volkening,J., Afonso,C.                                                                                                                                                                                                                                                                                                                                                                                                                                                                     |
| EPI_ISL_676650                                                                                                                                                                                                                                                                                                                                                                                                                                                                                                                                                                                                                                                                                                                                                                                                                                                                                                                                                                                                                                                                                                                                                                                                                                                                                                                                                                                                                                                                                                                                                                                                                                                                                                                                                                                                                                                                                                                                                                                                                                                                                                                                                                                                                                                                                                                                                                                                                                                                                                                                                                                                                                                                                                                                                                                                                                                                                                                                                                                                                                                                                                                                                                                                                                                                                                                                                                                                                                                                                                                                                                                                                                                                                                                                                                                                                                                                                                                                                                                                                                                                                                                                                                                                                                                                                                                                                                                                                                                                                                                                                                                                                                                                                                                                                                                                                                                                                                                                                                                                                                                                                                                                                                                                                                                                                                                                                                                                                                                                                                                                                                                                                                                                                                                                                                 | Wadsworth Center, New York State Department of Health                                                                                                                            | Wadsworth Center, New York State Department of Health                                                                             | Kirsten St. George, Daryl M. Lamson, Sara Griesemer, Jonathan Pitnick, Navjot Singh, Matthew D. Shudt, Erica Lasek-Nesselquist                                                                                                                                                                                                                                                                                                                                                                                                                                                                          |
| EPI_ISL_676651                                                                                                                                                                                                                                                                                                                                                                                                                                                                                                                                                                                                                                                                                                                                                                                                                                                                                                                                                                                                                                                                                                                                                                                                                                                                                                                                                                                                                                                                                                                                                                                                                                                                                                                                                                                                                                                                                                                                                                                                                                                                                                                                                                                                                                                                                                                                                                                                                                                                                                                                                                                                                                                                                                                                                                                                                                                                                                                                                                                                                                                                                                                                                                                                                                                                                                                                                                                                                                                                                                                                                                                                                                                                                                                                                                                                                                                                                                                                                                                                                                                                                                                                                                                                                                                                                                                                                                                                                                                                                                                                                                                                                                                                                                                                                                                                                                                                                                                                                                                                                                                                                                                                                                                                                                                                                                                                                                                                                                                                                                                                                                                                                                                                                                                                                                 | Wadsworth Center, New York State Department.of Health                                                                                                                            | Wadsworth Center, New York State Department.of Health                                                                             | Kirsten St. George, Daryl M. Lamson, Alexis Russel, Jonathan Pitnick, Navjot Singh, John Kelly, Sara Griesemer, Erasmus Schneider, Erica Lasek-Nesselquist                                                                                                                                                                                                                                                                                                                                                                                                                                              |
| EPI_ISL_676652                                                                                                                                                                                                                                                                                                                                                                                                                                                                                                                                                                                                                                                                                                                                                                                                                                                                                                                                                                                                                                                                                                                                                                                                                                                                                                                                                                                                                                                                                                                                                                                                                                                                                                                                                                                                                                                                                                                                                                                                                                                                                                                                                                                                                                                                                                                                                                                                                                                                                                                                                                                                                                                                                                                                                                                                                                                                                                                                                                                                                                                                                                                                                                                                                                                                                                                                                                                                                                                                                                                                                                                                                                                                                                                                                                                                                                                                                                                                                                                                                                                                                                                                                                                                                                                                                                                                                                                                                                                                                                                                                                                                                                                                                                                                                                                                                                                                                                                                                                                                                                                                                                                                                                                                                                                                                                                                                                                                                                                                                                                                                                                                                                                                                                                                                                 | Masonic Medical Research Institute                                                                                                                                               | Wadsworth Center, New York State Department.of Health                                                                             | Nathan Tucker, Kirsten St. George, Daryl M. Lamson, Alexis Russel, Jonathan Pitnick, Navjot Singh, John Kelly, Sara Griesemer, Erasmus Schneider, Erica Lasek-Nesselquist                                                                                                                                                                                                                                                                                                                                                                                                                               |
| EPI_ISL_676653, EPI_ISL_676654, EPI_ISL_676655, EPI_ISL_676657, EPI_ISL_676660, EPI_ISL_676662, EPI_ISL_676664, EPI_ISL_676667, EPI_ISL_676669, EPI_ISL_676670, EPI_ISL_676672, EPI_ISL_676673, EPI_ISL_676674, EPI_ISL_676675, EPI_ISL_676676, EPI_ISL_676677, EPI_ISL_676678, EPI_ISL_676679, EPI_ISL_676680, EPI_ISL_676681, EPI_ISL_676682, EPI_ISL_676683, EPI_ISL_676684, EPI_ISL_676685, EPI_ISL_676686, EPI_ISL_676687, EPI_ISL_676688, EPI_ISL_676689, EPI_ISL_676690, EPI_ISL_676691, EPI_ISL_676692, EPI_ISL_676693, EPI_ISL_676694, EPI_ISL_676695, EPI_ISL_676696, EPI_ISL_676697, EPI_ISL_676698, EPI_ISL_676699, EPI_ISL_676700, EPI_ISL_676701, EPI_ISL_676702, EPI_ISL_676703, EPI_ISL_676704, EPI_ISL_676705, EPI_ISL_676706, EPI_ISL_676707, EPI_ISL_676708, EPI_ISL_676709, EPI_ISL_676710, EPI_ISL_676711, EPI_ISL_676712, EPI_ISL_676713, EPI_ISL_676714, EPI_ISL_676715, EPI_ISL_676716, EPI_ISL_676717, EPI_ISL_676718, EPI_ISL_676719, EPI_ISL_676720, EPI_ISL_676721, EPI_ISL_676722, EPI_ISL_676723, EPI_ISL_676724, EPI_ISL_676725, EPI_ISL_676726, EPI_ISL_676727, EPI_ISL_676728, EPI_ISL_676729, EPI_ISL_676730, EPI_ISL_676731, EPI_ISL_676732, EPI_ISL_676733, EPI_ISL_676734, EPI_ISL_676735, EPI_ISL_676736, EPI_ISL_676737, EPI_ISL_676738, EPI_ISL_676739, EPI_ISL_676740, EPI_ISL_676741, EPI_ISL_676742, EPI_ISL_676743, EPI_ISL_676744, EPI_ISL_676745, EPI_ISL_676746, EPI_ISL_676747, EPI_ISL_676748, EPI_ISL_676749, EPI_ISL_676750, EPI_ISL_676751, EPI_ISL_676752, EPI_ISL_676753, EPI_ISL_676754, EPI_ISL_676755, EPI_ISL_676756, EPI_ISL_676757, EPI_ISL_676758, EPI_ISL_676759, EPI_ISL_676760, EPI_ISL_676761, EPI_ISL_676762, EPI_ISL_676763, EPI_ISL_676764, EPI_ISL_676765, EPI_ISL_676766, EPI_ISL_676767, EPI_ISL_676768, EPI_ISL_676769, EPI_ISL_676770, EPI_ISL_676771, EPI_ISL_676772, EPI_ISL_676773, EPI_ISL_676774, EPI_ISL_676775, EPI_ISL_676776, EPI_ISL_676777, EPI_ISL_676778, EPI_ISL_676779, EPI_ISL_676780, EPI_ISL_676781, EPI_ISL_676782, EPI_ISL_676783, EPI_ISL_676784, EPI_ISL_676785, EPI_ISL_676786, EPI_ISL_676787, EPI_ISL_676788, EPI_ISL_676789, EPI_ISL_676790, EPI_ISL_676791, EPI_ISL_676792, EPI_ISL_676793, EPI_ISL_676794, EPI_ISL_676795, EPI_ISL_676796, EPI_ISL_676797, EPI_ISL_676798, EPI_ISL_676799, EPI_ISL_676800, EPI_ISL_676801, EPI_ISL_676802, EPI_ISL_676803, EPI_ISL_676804, EPI_ISL_676805, EPI_ISL_676806, EPI_ISL_676807, EPI_ISL_676808, EPI_ISL_676809, EPI_ISL_676810, EPI_ISL_676811, EPI_ISL_676812, EPI_ISL_676813, EPI_ISL_676814, EPI_ISL_676815, EPI_ISL_676816, EPI_ISL_676817, EPI_ISL_676818, EPI_ISL_676819, EPI_ISL_676820, EPI_ISL_676821, EPI_ISL_676822, EPI_ISL_676823, EPI_ISL_676824, EPI_ISL_676825, EPI_ISL_676826, EPI_ISL_676827, EPI_ISL_676828, EPI_ISL_676829, EPI_ISL_676830, EPI_ISL_676831, EPI_ISL_676832, EPI_ISL_676833, EPI_ISL_676834, EPI_ISL_676835, EPI_ISL_676836, EPI_ISL_676837, EPI_ISL_676838, EPI_ISL_676839, EPI_ISL_676840, EPI_ISL_676841, EPI_ISL_676842, EPI_ISL_676843, EPI_ISL_676844, EPI_ISL_676845, EPI_ISL_676846, EPI_ISL_676847, EPI_ISL_676848, EPI_ISL_676849, EPI_ISL_676850, EPI_ISL_676851, EPI_ISL_676852, EPI_ISL_676853, EPI_ISL_676854, EPI_ISL_676855, EPI_ISL_676856, EPI_ISL_676857, EPI_ISL_676858, EPI_ISL_676859, EPI_ISL_676860, EPI_ISL_676861, EPI_ISL_676862, EPI_ISL_676863, EPI_ISL_676864, EPI_ISL_676865, EPI_ISL_676866, EPI_ISL_676867, EPI_ISL_676868, EPI_ISL_676869, EPI_ISL_676870, EPI_ISL_676871, EPI_ISL_676872, EPI_ISL_676873, EPI_ISL_676874, EPI_ISL_676875, EPI_ISL_676876, EPI_ISL_676877, EPI_ISL_676878, EPI_ISL_676879, EPI_ISL_676880, EPI_ISL_676881, EPI_ISL_676882, EPI_ISL_676883, EPI_ISL_676884, EPI_ISL_676885, EPI_ISL_676886, EPI_ISL_676887, EPI_ISL_676888, EPI_ISL_676889, EPI_ISL_676890, EPI_ISL_676891, EPI_ISL_676892, EPI_ISL_676893, EPI_ISL_676894, EPI_ISL_676895, EPI_ISL_676896, EPI_ISL_676897, EPI_ISL_676898, EPI_ISL_676899, EPI_ISL_676900, EPI_ISL_676901, EPI_ISL_676902, EPI_ISL_676903, EPI_ISL_676904, EPI_ISL_676905, EPI_ISL_676906, EPI_ISL_676907, EPI_ISL_676908, EPI_ISL_676909, EPI_ISL_676910, EPI_ISL_676911, EPI_ISL_676912, EPI_ISL_676913, EPI_ISL_676914, EPI_ISL_676915, EPI_ISL_676916, EPI_ISL_676917, EPI_ISL_676918, EPI_ISL_676919, EPI_ISL_676920, EPI_ISL_676921, EPI_ISL_676922, EPI_ISL_676923, EPI_ISL_676924, EPI_ISL_676925, EPI_ISL_676926, EPI_ISL_676927, EPI_ISL_676928, EPI_ISL_676929, EPI_ISL_676930, EPI_ISL_676931, EPI_ISL_676932, EPI_ISL_676933, EPI_ISL_676934, EPI_ISL_676935, EPI_ISL_676936, EPI_ISL_676937, EPI_ISL_676938, EPI_ISL_676939, EPI_ISL_676940, EPI_ISL_676941, EPI_ISL_676942, EPI_ISL_676943, EPI_ISL_676944, EPI_ISL_676945, EPI_ISL_676946, EPI_ISL_676947, EPI_ISL_676948, EPI_ISL_676949, EPI_ISL_676950, EPI_ISL_676951, EPI_ISL_676952, EPI_ISL_676953, EPI_ISL_676954, EPI_ISL_676955, EPI_ISL_676956, EPI_ISL_676957, EPI_ISL_676958, EPI_ISL_676959, EPI_ISL_676960, EPI_ISL_676961, EPI_ISL_676962, EPI_ISL_676963, EPI_ISL_676964, EPI_ISL_676965, EPI_ISL_676966, EPI_ISL_676967, EPI_ISL_676968, EPI_ISL_676969, EPI_ISL_676970, EPI_ISL_676971, EPI_ISL_676972, EPI_ISL_676973, EPI_ISL_676974, EPI_ISL_676975, EPI_ISL_676976, EPI_ISL_676977, EPI_ISL_676978, EPI_ISL_676979, EPI_ISL_676980, EPI_ISL_676981, EPI_ISL_676982, EPI_ISL_676983, EPI_ISL_676984, EPI_ISL_676985, EPI_ISL_676986, EPI_ISL_676987, EPI_ISL_676988, EPI_ISL_676989, EPI_ISL_676990, EPI_ISL_676991, EPI_ISL_676992, EPI_ISL_677026, EPI_ISL_677027, EPI_ISL_677028, EPI_ISL_677029, EPI_ISL_677030, EPI_ISL_677031, EPI_ISL_677032, EPI_ISL_677033, EPI_ISL_677034, EPI_ISL_677035, EPI_ISL_677036, EPI_ISL_677037, EPI_ISL_677038, EPI_ISL_677039, EPI_ISL_677040, EPI_ISL_677041 |                                                                                                                                                                                  |                                                                                                                                   |                                                                                                                                                                                                                                                                                                                                                                                                                                                                                                                                                                                                         |
| see above                                                                                                                                                                                                                                                                                                                                                                                                                                                                                                                                                                                                                                                                                                                                                                                                                                                                                                                                                                                                                                                                                                                                                                                                                                                                                                                                                                                                                                                                                                                                                                                                                                                                                                                                                                                                                                                                                                                                                                                                                                                                                                                                                                                                                                                                                                                                                                                                                                                                                                                                                                                                                                                                                                                                                                                                                                                                                                                                                                                                                                                                                                                                                                                                                                                                                                                                                                                                                                                                                                                                                                                                                                                                                                                                                                                                                                                                                                                                                                                                                                                                                                                                                                                                                                                                                                                                                                                                                                                                                                                                                                                                                                                                                                                                                                                                                                                                                                                                                                                                                                                                                                                                                                                                                                                                                                                                                                                                                                                                                                                                                                                                                                                                                                                                                                      | Wadsworth Center, New York State Department.of Health                                                                                                                            | Wadsworth Center, New York State Department.of Health                                                                             | Kirsten St. George, Daryl M. Lamson, Alexis Russel, Jonathan Pitnick, Navjot Singh, John Kelly, Sara Griesemer, Erasmus Schneider, Erica Lasek-Nesselquist                                                                                                                                                                                                                                                                                                                                                                                                                                              |
| EPI_ISL_677051, EPI_ISL_677052, EPI_ISL_677053, EPI_ISL_677054, EPI_ISL_677055, EPI_ISL_677056, EPI_ISL_677058, EPI_ISL_677059, EPI_ISL_677061, EPI_ISL_677062, EPI_ISL_677069, EPI_ISL_677074, EPI_ISL_677075                                                                                                                                                                                                                                                                                                                                                                                                                                                                                                                                                                                                                                                                                                                                                                                                                                                                                                                                                                                                                                                                                                                                                                                                                                                                                                                                                                                                                                                                                                                                                                                                                                                                                                                                                                                                                                                                                                                                                                                                                                                                                                                                                                                                                                                                                                                                                                                                                                                                                                                                                                                                                                                                                                                                                                                                                                                                                                                                                                                                                                                                                                                                                                                                                                                                                                                                                                                                                                                                                                                                                                                                                                                                                                                                                                                                                                                                                                                                                                                                                                                                                                                                                                                                                                                                                                                                                                                                                                                                                                                                                                                                                                                                                                                                                                                                                                                                                                                                                                                                                                                                                                                                                                                                                                                                                                                                                                                                                                                                                                                                                                 | Masonic Medical Research Institute                                                                                                                                               | Wadsworth Center, New York State Department.of Health                                                                             | Nathan Tucker, Kirsten St. George, Daryl M. Lamson, Alexis Russel, Jonathan Pitnick, Navjot Singh, John Kelly, Sara Griesemer, Erasmus Schneider, Erica Lasek-Nesselquist                                                                                                                                                                                                                                                                                                                                                                                                                               |
| see above                                                                                                                                                                                                                                                                                                                                                                                                                                                                                                                                                                                                                                                                                                                                                                                                                                                                                                                                                                                                                                                                                                                                                                                                                                                                                                                                                                                                                                                                                                                                                                                                                                                                                                                                                                                                                                                                                                                                                                                                                                                                                                                                                                                                                                                                                                                                                                                                                                                                                                                                                                                                                                                                                                                                                                                                                                                                                                                                                                                                                                                                                                                                                                                                                                                                                                                                                                                                                                                                                                                                                                                                                                                                                                                                                                                                                                                                                                                                                                                                                                                                                                                                                                                                                                                                                                                                                                                                                                                                                                                                                                                                                                                                                                                                                                                                                                                                                                                                                                                                                                                                                                                                                                                                                                                                                                                                                                                                                                                                                                                                                                                                                                                                                                                                                                      | Wadsworth Center, New York State Department.of Health                                                                                                                            | Wadsworth Center, New York State Department.of Health                                                                             | Kirsten St. George, Daryl M. Lamson, Alexis Russel, Jonathan Pitnick, Navjot Singh, John Kelly, Sara Griesemer, Erasmus Schneider, Erica Lasek-Nesselquist                                                                                                                                                                                                                                                                                                                                                                                                                                              |
| EPI_ISL_677089, EPI_ISL_677092, EPI_ISL_677094, EPI_ISL_677095, EPI_ISL_677096, EPI_ISL_677097, EPI_ISL_677098, EPI_ISL_677100, EPI_ISL_677101, EPI_ISL_677102, EPI_ISL_677103, EPI_ISL_677104, EPI_ISL_677105, EPI_ISL_677106, EPI_ISL_677107, EPI_ISL_677110                                                                                                                                                                                                                                                                                                                                                                                                                                                                                                                                                                                                                                                                                                                                                                                                                                                                                                                                                                                                                                                                                                                                                                                                                                                                                                                                                                                                                                                                                                                                                                                                                                                                                                                                                                                                                                                                                                                                                                                                                                                                                                                                                                                                                                                                                                                                                                                                                                                                                                                                                                                                                                                                                                                                                                                                                                                                                                                                                                                                                                                                                                                                                                                                                                                                                                                                                                                                                                                                                                                                                                                                                                                                                                                                                                                                                                                                                                                                                                                                                                                                                                                                                                                                                                                                                                                                                                                                                                                                                                                                                                                                                                                                                                                                                                                                                                                                                                                                                                                                                                                                                                                                                                                                                                                                                                                                                                                                                                                                                                                 | Wadsworth Center, New York State Department.of Health                                                                                                                            | Wadsworth Center, New York State Department.of Health                                                                             | Kirsten St. George, Daryl M. Lamson, Alexis Russel, Jonathan Pitnick, Navjot Singh, John Kelly, Sara Griesemer, Erasmus Schneider, Erica Lasek-Nesselquist                                                                                                                                                                                                                                                                                                                                                                                                                                              |
| EPI_ISL_677111, EPI_ISL_677112, EPI_ISL_677113, EPI_ISL_677115, EPI_ISL_677116, EPI_ISL_677117, EPI_ISL_677118, EPI_ISL_677119, EPI_ISL_677122, EPI_ISL_677124, EPI_ISL_677125, EPI_ISL_677129                                                                                                                                                                                                                                                                                                                                                                                                                                                                                                                                                                                                                                                                                                                                                                                                                                                                                                                                                                                                                                                                                                                                                                                                                                                                                                                                                                                                                                                                                                                                                                                                                                                                                                                                                                                                                                                                                                                                                                                                                                                                                                                                                                                                                                                                                                                                                                                                                                                                                                                                                                                                                                                                                                                                                                                                                                                                                                                                                                                                                                                                                                                                                                                                                                                                                                                                                                                                                                                                                                                                                                                                                                                                                                                                                                                                                                                                                                                                                                                                                                                                                                                                                                                                                                                                                                                                                                                                                                                                                                                                                                                                                                                                                                                                                                                                                                                                                                                                                                                                                                                                                                                                                                                                                                                                                                                                                                                                                                                                                                                                                                                 | Masonic Medical Research Institute                                                                                                                                               | Wadsworth Center, New York State Department.of Health                                                                             | Nathan Tucker, Kirsten St. George, Daryl M. Lamson, Alexis Russel, Jonathan Pitnick, Navjot Singh, John Kelly, Sara Griesemer, Erasmus Schneider, Erica Lasek-Nesselquist                                                                                                                                                                                                                                                                                                                                                                                                                               |
| EPI_ISL_677130, EPI_ISL_677131, EPI_ISL_677133, EPI_ISL_677664, EPI_ISL_677665, EPI_ISL_677666, EPI_ISL_677667                                                                                                                                                                                                                                                                                                                                                                                                                                                                                                                                                                                                                                                                                                                                                                                                                                                                                                                                                                                                                                                                                                                                                                                                                                                                                                                                                                                                                                                                                                                                                                                                                                                                                                                                                                                                                                                                                                                                                                                                                                                                                                                                                                                                                                                                                                                                                                                                                                                                                                                                                                                                                                                                                                                                                                                                                                                                                                                                                                                                                                                                                                                                                                                                                                                                                                                                                                                                                                                                                                                                                                                                                                                                                                                                                                                                                                                                                                                                                                                                                                                                                                                                                                                                                                                                                                                                                                                                                                                                                                                                                                                                                                                                                                                                                                                                                                                                                                                                                                                                                                                                                                                                                                                                                                                                                                                                                                                                                                                                                                                                                                                                                                                                 | Wadsworth Center, New York State Department.of Health                                                                                                                            | Wadsworth Center, New York State Department.of Health                                                                             | Kirsten St. George, Daryl M. Lamson, Alexis Russel, Jonathan Pitnick, Navjot Singh, John Kelly, Sara Griesemer, Erasmus Schneider, Erica Lasek-Nesselquist                                                                                                                                                                                                                                                                                                                                                                                                                                              |
| EPI_ISL_677669                                                                                                                                                                                                                                                                                                                                                                                                                                                                                                                                                                                                                                                                                                                                                                                                                                                                                                                                                                                                                                                                                                                                                                                                                                                                                                                                                                                                                                                                                                                                                                                                                                                                                                                                                                                                                                                                                                                                                                                                                                                                                                                                                                                                                                                                                                                                                                                                                                                                                                                                                                                                                                                                                                                                                                                                                                                                                                                                                                                                                                                                                                                                                                                                                                                                                                                                                                                                                                                                                                                                                                                                                                                                                                                                                                                                                                                                                                                                                                                                                                                                                                                                                                                                                                                                                                                                                                                                                                                                                                                                                                                                                                                                                                                                                                                                                                                                                                                                                                                                                                                                                                                                                                                                                                                                                                                                                                                                                                                                                                                                                                                                                                                                                                                                                                 | Masonic Medical Research Institute                                                                                                                                               | Wadsworth Center, New York State Department.of Health                                                                             | Nathan Tucker, Kirsten St. George, Daryl M. Lamson, Alexis Russel, Jonathan Pitnick, Navjot Singh, John Kelly, Sara Griesemer, Erasmus Schneider, Erica Lasek-Nesselquist                                                                                                                                                                                                                                                                                                                                                                                                                               |
| EPI_ISL_677670, EPI_ISL_677671, EPI_ISL_677673                                                                                                                                                                                                                                                                                                                                                                                                                                                                                                                                                                                                                                                                                                                                                                                                                                                                                                                                                                                                                                                                                                                                                                                                                                                                                                                                                                                                                                                                                                                                                                                                                                                                                                                                                                                                                                                                                                                                                                                                                                                                                                                                                                                                                                                                                                                                                                                                                                                                                                                                                                                                                                                                                                                                                                                                                                                                                                                                                                                                                                                                                                                                                                                                                                                                                                                                                                                                                                                                                                                                                                                                                                                                                                                                                                                                                                                                                                                                                                                                                                                                                                                                                                                                                                                                                                                                                                                                                                                                                                                                                                                                                                                                                                                                                                                                                                                                                                                                                                                                                                                                                                                                                                                                                                                                                                                                                                                                                                                                                                                                                                                                                                                                                                                                 | Wadsworth Center, New York State Department.of Health                                                                                                                            | Wadsworth Center, New York State Department.of Health                                                                             | Kirsten St. George, Daryl M. Lamson, Alexis Russel, Jonathan Pitnick, Navjot Singh, John Kelly, Sara Griesemer, Erasmus Schneider, Erica Lasek-Nesselquist                                                                                                                                                                                                                                                                                                                                                                                                                                              |
| EPI_ISL_677725                                                                                                                                                                                                                                                                                                                                                                                                                                                                                                                                                                                                                                                                                                                                                                                                                                                                                                                                                                                                                                                                                                                                                                                                                                                                                                                                                                                                                                                                                                                                                                                                                                                                                                                                                                                                                                                                                                                                                                                                                                                                                                                                                                                                                                                                                                                                                                                                                                                                                                                                                                                                                                                                                                                                                                                                                                                                                                                                                                                                                                                                                                                                                                                                                                                                                                                                                                                                                                                                                                                                                                                                                                                                                                                                                                                                                                                                                                                                                                                                                                                                                                                                                                                                                                                                                                                                                                                                                                                                                                                                                                                                                                                                                                                                                                                                                                                                                                                                                                                                                                                                                                                                                                                                                                                                                                                                                                                                                                                                                                                                                                                                                                                                                                                                                                 | General Hospital - Ohrid                                                                                                                                                         | Research Center for Genetic Engineering and Biotechnology "Georgi D. Efremov", Macedonian Academy of Sciences and Arts            | RCGEB - MASA                                                                                                                                                                                                                                                                                                                                                                                                                                                                                                                                                                                            |
| EPI_ISL_678327, EPI_ISL_678328, EPI_ISL_678344                                                                                                                                                                                                                                                                                                                                                                                                                                                                                                                                                                                                                                                                                                                                                                                                                                                                                                                                                                                                                                                                                                                                                                                                                                                                                                                                                                                                                                                                                                                                                                                                                                                                                                                                                                                                                                                                                                                                                                                                                                                                                                                                                                                                                                                                                                                                                                                                                                                                                                                                                                                                                                                                                                                                                                                                                                                                                                                                                                                                                                                                                                                                                                                                                                                                                                                                                                                                                                                                                                                                                                                                                                                                                                                                                                                                                                                                                                                                                                                                                                                                                                                                                                                                                                                                                                                                                                                                                                                                                                                                                                                                                                                                                                                                                                                                                                                                                                                                                                                                                                                                                                                                                                                                                                                                                                                                                                                                                                                                                                                                                                                                                                                                                                                                 | Area of Virology, Serology and Virology Division (SAVID), New South Wales Health Pathology Randwick                                                                              | Virology Research Laboratory; Area of Virology, Serology and Virology Division (SAVID), New South Wales Health Pathology Randwick | Foster, C.; Au, J.; Ruiz Silva, M.; Deveson, I.; Bull, R.; Van Hal, S.; Rawlinson, W.                                                                                                                                                                                                                                                                                                                                                                                                                                                                                                                   |
| EPI_ISL_678398                                                                                                                                                                                                                                                                                                                                                                                                                                                                                                                                                                                                                                                                                                                                                                                                                                                                                                                                                                                                                                                                                                                                                                                                                                                                                                                                                                                                                                                                                                                                                                                                                                                                                                                                                                                                                                                                                                                                                                                                                                                                                                                                                                                                                                                                                                                                                                                                                                                                                                                                                                                                                                                                                                                                                                                                                                                                                                                                                                                                                                                                                                                                                                                                                                                                                                                                                                                                                                                                                                                                                                                                                                                                                                                                                                                                                                                                                                                                                                                                                                                                                                                                                                                                                                                                                                                                                                                                                                                                                                                                                                                                                                                                                                                                                                                                                                                                                                                                                                                                                                                                                                                                                                                                                                                                                                                                                                                                                                                                                                                                                                                                                                                                                                                                                                 | Suceava County Emergency Hospital                                                                                                                                                | "Stefan cel Mare" University Metagenomics Lab                                                                                     | Lobiuc Andrei, Puscaselu Roxana                                                                                                                                                                                                                                                                                                                                                                                                                                                                                                                                                                         |
| EPI_ISL_680009                                                                                                                                                                                                                                                                                                                                                                                                                                                                                                                                                                                                                                                                                                                                                                                                                                                                                                                                                                                                                                                                                                                                                                                                                                                                                                                                                                                                                                                                                                                                                                                                                                                                                                                                                                                                                                                                                                                                                                                                                                                                                                                                                                                                                                                                                                                                                                                                                                                                                                                                                                                                                                                                                                                                                                                                                                                                                                                                                                                                                                                                                                                                                                                                                                                                                                                                                                                                                                                                                                                                                                                                                                                                                                                                                                                                                                                                                                                                                                                                                                                                                                                                                                                                                                                                                                                                                                                                                                                                                                                                                                                                                                                                                                                                                                                                                                                                                                                                                                                                                                                                                                                                                                                                                                                                                                                                                                                                                                                                                                                                                                                                                                                                                                                                                                 | Virology Department, Sheffield Teaching Hospitals NHS Foundation Trust/Department of Infection, Immunity and Cardiovascular Disease, The Medical School, University of Sheffield | COVID-19 Genomics UK (COG-UK) Consortium                                                                                          | Thushan de Silva, Matthew Parker, Nikki Smith, Adri Angyal, Rebecca Brown, Luke Green, Rachel Tucker, Paul Parsons, Danielle Groves, Katie Johnson, Laura Carrilero, Alex Keeley, Dave Partridge, Matthew Wyles, Benjamin Lindsey, Mehmet Yavuz, Mohammad Raza, Cariad Evans                                                                                                                                                                                                                                                                                                                            |
| EPI_ISL_682283                                                                                                                                                                                                                                                                                                                                                                                                                                                                                                                                                                                                                                                                                                                                                                                                                                                                                                                                                                                                                                                                                                                                                                                                                                                                                                                                                                                                                                                                                                                                                                                                                                                                                                                                                                                                                                                                                                                                                                                                                                                                                                                                                                                                                                                                                                                                                                                                                                                                                                                                                                                                                                                                                                                                                                                                                                                                                                                                                                                                                                                                                                                                                                                                                                                                                                                                                                                                                                                                                                                                                                                                                                                                                                                                                                                                                                                                                                                                                                                                                                                                                                                                                                                                                                                                                                                                                                                                                                                                                                                                                                                                                                                                                                                                                                                                                                                                                                                                                                                                                                                                                                                                                                                                                                                                                                                                                                                                                                                                                                                                                                                                                                                                                                                                                                 | Canterbury Health Laboratories                                                                                                                                                   | Institute of Environmental Science and Research (ESR)                                                                             | Xiaoyun Ren, Matt Storey, Nikki Freed, Muhammad Faisal, Jing Wang, Hermes Perez, Anja Werno, Antje van der Linden, Arlo Upton, Chris Mansell, David Hammer, Dragana Drinkovic, Gary McAuliffe, Hana Sofia Andersson, James Ussher, Jill Sherwood, Josh Freeman, Julia Howard, Juliet Ely, Mary DeAlmeida, Matt Blakiston, Matthew Rogers, Max Bloomfield, Michael Addidle, Michelle Balm, Sally Roberts, Sarah Jefferies, Sharmini Muttayyah, Susan Morpeth, Susan Taylor, Timothy Blackmore, Vani Sathyendran, Veronica Playle, Virginia Hope, Erasmus Smit, Lauren Jelly, Olin Silander, Joep de Ligt |
| EPI_ISL_682293                                                                                                                                                                                                                                                                                                                                                                                                                                                                                                                                                                                                                                                                                                                                                                                                                                                                                                                                                                                                                                                                                                                                                                                                                                                                                                                                                                                                                                                                                                                                                                                                                                                                                                                                                                                                                                                                                                                                                                                                                                                                                                                                                                                                                                                                                                                                                                                                                                                                                                                                                                                                                                                                                                                                                                                                                                                                                                                                                                                                                                                                                                                                                                                                                                                                                                                                                                                                                                                                                                                                                                                                                                                                                                                                                                                                                                                                                                                                                                                                                                                                                                                                                                                                                                                                                                                                                                                                                                                                                                                                                                                                                                                                                                                                                                                                                                                                                                                                                                                                                                                                                                                                                                                                                                                                                                                                                                                                                                                                                                                                                                                                                                                                                                                                                                 | LabPLUS                                                                                                                                                                          | Institute of Environmental Science and Research (ESR)                                                                             | Xiaoyun Ren, Matt Storey, Nikki Freed, Muhammad Faisal, Jing Wang, Hermes Perez, Anja Werno, Antje van der Linden, Arlo Upton, Chris Mansell, David Hammer, Dragana Drinkovic, Gary McAuliffe, Hana Sofia Andersson, James Ussher, Jill Sherwood, Josh Freeman, Julia Howard, Juliet Ely, Mary DeAlmeida, Matt Blakiston, Matthew Rogers, Max Bloomfield, Michael Addidle, Michelle Balm, Sally Roberts, Sarah Jefferies, Sharmini Muttayyah, Susan Morpeth, Susan Taylor, Timothy Blackmore, Vani Sathyendran, Veronica Playle, Virginia Hope, Erasmus Smit, Lauren Jelly, Olin Silander, Joep de Ligt |
| EPI_ISL_682295                                                                                                                                                                                                                                                                                                                                                                                                                                                                                                                                                                                                                                                                                                                                                                                                                                                                                                                                                                                                                                                                                                                                                                                                                                                                                                                                                                                                                                                                                                                                                                                                                                                                                                                                                                                                                                                                                                                                                                                                                                                                                                                                                                                                                                                                                                                                                                                                                                                                                                                                                                                                                                                                                                                                                                                                                                                                                                                                                                                                                                                                                                                                                                                                                                                                                                                                                                                                                                                                                                                                                                                                                                                                                                                                                                                                                                                                                                                                                                                                                                                                                                                                                                                                                                                                                                                                                                                                                                                                                                                                                                                                                                                                                                                                                                                                                                                                                                                                                                                                                                                                                                                                                                                                                                                                                                                                                                                                                                                                                                                                                                                                                                                                                                                                                                 | Canterbury Health Laboratories                                                                                                                                                   | Institute of Environmental Science and Research (ESR)                                                                             | Xiaoyun Ren, Matt Storey, Nikki Freed, Muhammad Faisal, Jing Wang, Hermes Perez, Anja Werno, Antje van der Linden, Arlo Upton, Chris Mansell, David Hammer, Dragana Drinkovic, Gary McAuliffe, Hana Sofia Andersson, James Ussher, Jill Sherwood, Josh Freeman, Julia Howard, Juliet Ely, Mary DeAlmeida, Matt Blakiston, Matthew Rogers, Max Bloomfield, Michael Addidle, Michelle Balm, Sally Roberts, Sarah Jefferies, Sharmini Muttayyah, Susan Morpeth, Susan Taylor, Timothy Blackmore, Vani Sathyendran, Veronica Playle, Virginia Hope, Erasmus Smit, Lauren Jelly, Olin Silander, Joep de Ligt |
| EPI_ISL_683708, EPI_ISL_683709                                                                                                                                                                                                                                                                                                                                                                                                                                                                                                                                                                                                                                                                                                                                                                                                                                                                                                                                                                                                                                                                                                                                                                                                                                                                                                                                                                                                                                                                                                                                                                                                                                                                                                                                                                                                                                                                                                                                                                                                                                                                                                                                                                                                                                                                                                                                                                                                                                                                                                                                                                                                                                                                                                                                                                                                                                                                                                                                                                                                                                                                                                                                                                                                                                                                                                                                                                                                                                                                                                                                                                                                                                                                                                                                                                                                                                                                                                                                                                                                                                                                                                                                                                                                                                                                                                                                                                                                                                                                                                                                                                                                                                                                                                                                                                                                                                                                                                                                                                                                                                                                                                                                                                                                                                                                                                                                                                                                                                                                                                                                                                                                                                                                                                                                                 | Essentia Health-St. Mary's Medical Center                                                                                                                                        | Minnesota Department of Health, Public Health Laboratory                                                                          | Alexandra Lorentz, Jacob Garfin, Matt Plumb, and Xiong Wang                                                                                                                                                                                                                                                                                                                                                                                                                                                                                                                                             |
| EPI_ISL_693206                                                                                                                                                                                                                                                                                                                                                                                                                                                                                                                                                                                                                                                                                                                                                                                                                                                                                                                                                                                                                                                                                                                                                                                                                                                                                                                                                                                                                                                                                                                                                                                                                                                                                                                                                                                                                                                                                                                                                                                                                                                                                                                                                                                                                                                                                                                                                                                                                                                                                                                                                                                                                                                                                                                                                                                                                                                                                                                                                                                                                                                                                                                                                                                                                                                                                                                                                                                                                                                                                                                                                                                                                                                                                                                                                                                                                                                                                                                                                                                                                                                                                                                                                                                                                                                                                                                                                                                                                                                                                                                                                                                                                                                                                                                                                                                                                                                                                                                                                                                                                                                                                                                                                                                                                                                                                                                                                                                                                                                                                                                                                                                                                                                                                                                                                                 | Hospital Municipal Mario Gatti                                                                                                                                                   | Instituto Adolfo Lutz, Interdisciplinary Procedures Center,                                                                       | Claudio Tavares Sacchi, Claudia Regina Gonçalves, Erica Valessa Ramos Gomes, Karoline Rodrigues Campos                                                                                                                                                                                                                                                                                                                                                                                                                                                                                                  |

|                                                                                                                                |                                                                                                                                                                       | Strategic Laboratory                                                                                                                                                                                                                                                                                                                                                     |                                                                                                                                                                                                                                                                                                                                                                                           |
|--------------------------------------------------------------------------------------------------------------------------------|-----------------------------------------------------------------------------------------------------------------------------------------------------------------------|--------------------------------------------------------------------------------------------------------------------------------------------------------------------------------------------------------------------------------------------------------------------------------------------------------------------------------------------------------------------------|-------------------------------------------------------------------------------------------------------------------------------------------------------------------------------------------------------------------------------------------------------------------------------------------------------------------------------------------------------------------------------------------|
| EPI_ISL_693484                                                                                                                 | Respiratory Virus Unit, Microbiology Services Colindale, Public Health England                                                                                        | COVID-19 Genomics UK (COG-UK) Consortium                                                                                                                                                                                                                                                                                                                                 | PHE Covid Sequencing Team                                                                                                                                                                                                                                                                                                                                                                 |
| EPI_ISL_694545, EPI_ISL_694907, EPI_ISL_695179                                                                                 | AZ SPHL, Arizona Department of Health Services                                                                                                                        | TGen North                                                                                                                                                                                                                                                                                                                                                               | Jolene Bowers, Megan Folkerts, Chris French, Hayley Yaglom, Ashlyn Pfeiffer, Darrin Lemmer, Dave Engelthaler, The Arizona COVID Genomics Union (ACGU)                                                                                                                                                                                                                                     |
| EPI_ISL_697794                                                                                                                 | Institute of Microbiology, Universidad San Francisco de Quito                                                                                                         | Institute of Microbiology, Universidad San Francisco de Quito                                                                                                                                                                                                                                                                                                            | Andrea Macias, Belén Prado-Vivar, Sully Márquez, Juan José Guadalupe, Monica Becerra-Wong, Bernardo Gutiérrez, Verónica Barragán, Patricio Rojas-Silva, Gabriel Trueba, Michelle Grunauer, Paul Cárdenas                                                                                                                                                                                  |
| EPI_ISL_700470                                                                                                                 | D'Almeida Clinic wc DAL                                                                                                                                               | NHLS/UCT                                                                                                                                                                                                                                                                                                                                                                 | Houriya Tegally, Arash Iranzadeh, Deelan Doolabh, Lynn Tyers, Bruna Galvao, Innocent Mudau, Marvin Hsiao, Kruger Marais, Diana Hardie, Stephen Korsman, Carolyn Williamson                                                                                                                                                                                                                |
| EPI_ISL_700508                                                                                                                 | Heideveld CDC wc HVP                                                                                                                                                  | NHLS/UCT                                                                                                                                                                                                                                                                                                                                                                 | Arash Iranzadeh, Deelan Doolabh, Lynn Tyers, Bruna Galvao, Innocent Mudau, Marvin Hsiao, Kruger Marais, Diana Hardie, Stephen Korsman, Carolyn Williamson                                                                                                                                                                                                                                 |
| EPI_ISL_700512                                                                                                                 | Guguletu CHC wc GDH                                                                                                                                                   | NHLS/UCT                                                                                                                                                                                                                                                                                                                                                                 | Arash Iranzadeh, Deelan Doolabh, Lynn Tyers, Bruna Galvao, Innocent Mudau, Marvin Hsiao, Kruger Marais, Diana Hardie, Stephen Korsman, Carolyn Williamson                                                                                                                                                                                                                                 |
| EPI_ISL_702770                                                                                                                 | Lighthouse Lab in Alderley Park                                                                                                                                       | Wellcome Sanger Institute for the COVID-19 Genomics UK (COG-UK) Consortium                                                                                                                                                                                                                                                                                               | Jacquelyn Wynn, Mairead Hyland, The Lighthouse Lab in Alderley Park and Alex Alderton, Roberto Amato, Sonia Goncalves, Ewan Harrison, David K. Jackson, Ian Johnston, Dominic Kwiatkowski, Cordelia Langford, John Sillitoe on behalf of the Wellcome Sanger Institute COVID-19 Surveillance Team                                                                                         |
| EPI_ISL_707791                                                                                                                 | 1-Laboratory of Microbiology, National Reference Lab, Charles Nicolle Hospital; 2-University of Tunis ElManar, Faculty of Medicine of Tunis, LR99ES09, Tunis, Tunisia | 1-Clinical and Experimental Pharmacology Lab, LR16SP02, National Center of Pharmacovigilance, University of Tunis El Manar, Tunis, Tunisia. 2-Neurodegenerative diseases and psychiatric troubles, LR18SP03, Razi Hospital, University of Tunis El Manar, Tunis, Tunisia. 3- Ministry of Health, National Observatory of New and Emerging Diseases, 1006, Tunis, Tunisia | Ilhem Boutiba-Ben Boubaker, Sameh Trabelsi, Nissaf Ben Alaya, Maher Kharrat, Alia Ben Kahla, Jalila Ben Kheili, Salma Abid, Sana Ferjani, Mouna Ben Sassi, Mouna Safer, Awatef El MOUSSI, Habiba Ben Romdhane, Soussi Amira, Ines M dini, Hanen El Jebari, Asma Ferjani, Gaies Emna, Riadh Daghighous, Riadh Gouider.                                                                     |
| EPI_ISL_707900                                                                                                                 | Area of Virology, Serology and Virology Division (SAVID), New South Wales Health Pathology Randwick                                                                   | Virology Research Laboratory; Area of Virology, Serology and Virology Division (SAVID), New South Wales Health Pathology Randwick                                                                                                                                                                                                                                        | Foster, C.; Au, J.; Ruiz Silva, M.; Deveson, I.; Bull, R.; Van Hal, S.; Rawlinson, W.                                                                                                                                                                                                                                                                                                     |
| EPI_ISL_708501                                                                                                                 | Minnesota Department of Health, Public Health Laboratory                                                                                                              | Minnesota Department of Health, Public Health Laboratory                                                                                                                                                                                                                                                                                                                 | Alexandra Lorentz, Jacob Garfin, Matt Plumb, and Xiong Wang                                                                                                                                                                                                                                                                                                                               |
| EPI_ISL_708529                                                                                                                 | Secretaria Municipal de Saude de Fernandópolis                                                                                                                        | Instituto Adolfo Lutz, Interdisciplinary Procedures Center, Strategic Laboratory                                                                                                                                                                                                                                                                                         | Claudio Tavares Sacchi, Claudia Regina Gonçalves, Erica Valessa Ramos Gomes, Carlos Henrique Camargo, Karoline Rodrigues Campos, Fernanda Modesto Tolentino Binhardi, Maricelia Navarro Pinheiro Flores, Marcia Maria Costa Nunes Soares, Janaina Other Martins Montanha                                                                                                                  |
| EPI_ISL_708530                                                                                                                 | Secretaria Municipal de Saude de Fernandópolis                                                                                                                        | Instituto Adolfo Lutz, Interdisciplinary Procedures Center, Strategic Laboratory                                                                                                                                                                                                                                                                                         | Claudio Tavares Sacchi, Claudia Regina Gonçalves, Erica Valessa Ramos Gomes, Carlos Henrique Camargo, Karoline Rodrigues Campos, Fernanda Modesto Tolentino Binhardi, Maricelia Navarro Pinheiro Flores, Marcia Maria Costa Nunes Soares, Janaina Other Martins Montanha                                                                                                                  |
| EPI_ISL_710100                                                                                                                 | Los Angeles County PHL                                                                                                                                                | Los Angeles County PHL                                                                                                                                                                                                                                                                                                                                                   | P. Hemarajata et al.                                                                                                                                                                                                                                                                                                                                                                      |
| EPI_ISL_714546                                                                                                                 | Department of Virus and Microbiological Special Diagnostics, Statens Serum Institut, Copenhagen, Denmark                                                              | Albertsen Lab, Department of Chemistry and Bioscience, Aalborg University, Denmark                                                                                                                                                                                                                                                                                       | Danish Covid-19 Genome Consortium                                                                                                                                                                                                                                                                                                                                                         |
| EPI_ISL_717706, EPI_ISL_717711                                                                                                 | Area of Virology, Serology and Virology Division (SAVID), New South Wales Health Pathology Randwick                                                                   | Virology Research Laboratory; Area of Virology, Serology and Virology Division (SAVID), New South Wales Health Pathology Randwick                                                                                                                                                                                                                                        | Foster, C.; Au, J.; Ruiz Silva, M.; Deveson, I.; Bull, R.; Van Hal, S.; Rawlinson, W.                                                                                                                                                                                                                                                                                                     |
| EPI_ISL_717750, EPI_ISL_717762, EPI_ISL_717763                                                                                 | Kingston Health Sciences Centre and Queen's University                                                                                                                | Ontario Institute for Cancer Research                                                                                                                                                                                                                                                                                                                                    | Prameet M. Sheth, Calvin Sjaarda, Robert Colautti, Katya Douchant, Ilinca Lungu, Bernard Lam, Paul Krzyzanowski, Michael Laszloffy, Lawrence E. Heisler, Richard de Borja, Jared T. Simpson                                                                                                                                                                                               |
| EPI_ISL_717807, EPI_ISL_717823                                                                                                 | Laboratorio de Virologia Molecular / UFRJ                                                                                                                             | Bioinformatics Laboratory / LNCC                                                                                                                                                                                                                                                                                                                                         | Carolina M Voloch, Ronaldo da Silva F Jr, Luiz G P de Almeida, Cynthia C Cardoso, Otavio Bustrolini, Alexandra L Gerber, Ana Paula de C Guimarães, Diana Mariani, Andréa Cony Cavalcanti, Claudia dos Santos Rodrigues, Terezinha M P P Castañeira, Amílcar Tanuri, Ana Tereza R de Vasconcelos                                                                                           |
| EPI_ISL_717836                                                                                                                 | LACEN Dr. Francisco Rimolo Neto                                                                                                                                       | Bioinformatics Laboratory / LNCC                                                                                                                                                                                                                                                                                                                                         | Carolina M Voloch, Ronaldo da Silva F Jr, Luiz G P de Almeida, Cynthia C Cardoso, Otavio Bustrolini, Alexandra L Gerber, Ana Paula de C Guimarães, Diana Mariani, Andréa Cony Cavalcanti, Claudia dos Santos Rodrigues, Terezinha M P P Castañeira, Amílcar Tanuri, Ana Tereza R de Vasconcelos                                                                                           |
| EPI_ISL_717873, EPI_ISL_717880, EPI_ISL_717881, EPI_ISL_717884, EPI_ISL_717888, EPI_ISL_717889, EPI_ISL_717893, EPI_ISL_717898 | Laboratorio de Virologia Molecular / UFRJ                                                                                                                             | Bioinformatics Laboratory / LNCC                                                                                                                                                                                                                                                                                                                                         | Carolina M Voloch, Ronaldo da Silva F Jr, Luiz G P de Almeida, Cynthia C Cardoso, Otavio Bustrolini, Alexandra L Gerber, Ana Paula de C Guimarães, Diana Mariani, Andréa Cony Cavalcanti, Claudia dos Santos Rodrigues, Terezinha M P P Castañeira, Amílcar Tanuri, Ana Tereza R de Vasconcelos                                                                                           |
| EPI_ISL_717910, EPI_ISL_717912                                                                                                 | LACEN Dr. Francisco Rimolo Neto                                                                                                                                       | Bioinformatics Laboratory / LNCC                                                                                                                                                                                                                                                                                                                                         | Carolina M Voloch, Ronaldo da Silva F Jr, Luiz G P de Almeida, Cynthia C Cardoso, Otavio Bustrolini, Alexandra L Gerber, Ana Paula de C Guimarães, Diana Mariani, Andréa Cony Cavalcanti, Claudia dos Santos Rodrigues, Terezinha M P P Castañeira, Amílcar Tanuri, Ana Tereza R de Vasconcelos                                                                                           |
| EPI_ISL_718059, EPI_ISL_718079, EPI_ISL_718096                                                                                 | ZOTZ KLIMAS MVZ Düsseldorf-Centrum GbR ÜBAG für Labormedizin, Genetik, Zytologie, Pathologie                                                                          | Center of Medical Microbiology, Virology, and Hospital Hygiene, University of Duesseldorf                                                                                                                                                                                                                                                                                | Maximilian Damagnez, Alexander Dilthey, Ashley-Jane Duplessis, Patrick Finzer, Katrin Hoffmann, Torsten Houwaart, Lisanna Hülse, Malte Kohns Vasconcelos, Marek Korencak, Nadine Lübke, Jessica Nicolai, Klaus Pfeffer, Daniel Strelow, Jörg Timm, Andreas Walker, Tobias Wienemann, Rainer Zotz                                                                                          |
| EPI_ISL_718105                                                                                                                 | Kingston Health Sciences Centre and Queen's University                                                                                                                | Ontario Institute for Cancer Research                                                                                                                                                                                                                                                                                                                                    | Prameet M. Sheth, Calvin Sjaarda, Robert Colautti, Katya Douchant, Ilinca Lungu, Bernard Lam, Paul Krzyzanowski, Michael Laszloffy, Lawrence E. Heisler, Richard de Borja, Jared T. Simpson                                                                                                                                                                                               |
| EPI_ISL_721718                                                                                                                 | Viollier AG                                                                                                                                                           | Department of Biosystems Science and Engineering, ETH Zürich                                                                                                                                                                                                                                                                                                             | Christian Beisel                                                                                                                                                                                                                                                                                                                                                                          |
| EPI_ISL_722017                                                                                                                 | Hospital das Clínicas Universidade de São Paulo Medical School                                                                                                        | Laboratório de Parasitologia Médica - Instituto de Medicina Tropical - Universidade de São Paulo                                                                                                                                                                                                                                                                         | Brazil-UK Centre for Arbovirus Discovery Diagnosis Genomics and Epidemiology (CADDE) Genomic Network - Instituto de Medicina Tropical                                                                                                                                                                                                                                                     |
| EPI_ISL_724010                                                                                                                 | Oxford Viromics, NDM, University of Oxford; Oxford University Hospitals; Basingstoke and North Hampshire Hospital                                                     | COVID-19 Genomics UK (COG-UK) Consortium                                                                                                                                                                                                                                                                                                                                 | Tanya Golubchik, David Bonsall, George Macintyre, Amy Trebes, Mariateresa de Cesare, Catrin Moore, Alex Mobbs, Anita Justice, Robert Shaw, Monique Andersson, Timothy Peto, Emma Wise, Nathan Moore, Jessica Lynch, Nick Cortes, Matilde Mori, Stephen Kidd, David Buck, John Todd, Christophe Fraser                                                                                     |
| EPI_ISL_728499                                                                                                                 | University of Michigan Clinical Microbiology Laboratory                                                                                                               | Lauring Lab, University of Michigan, Department of Microbiology and Immunology                                                                                                                                                                                                                                                                                           | Valesano                                                                                                                                                                                                                                                                                                                                                                                  |
| EPI_ISL_728917                                                                                                                 | Viollier AG                                                                                                                                                           | Department of Biosystems Science and Engineering, ETH Zürich                                                                                                                                                                                                                                                                                                             | Chaoran Chen, Sarah Nadeau, Catharine Aquino, Ivan Topolsky, Pedro Ferreira, Philipp Jablonski, Susana Posada-Céspedes, Andreia Cabral de Gouvea, Maria Domenica Moccia, Simon Grüter, Timothy Sykes, Lennart Opitz, Ralph Schlapbach, Christiane Beckmann, Maurice Redondo, Olivier Kobel, Christoph Noppen, Sophie Seidel, Noemie Santamaria de Souza, Niko Beerenwinkel, Tanja Stadler |
| EPI_ISL_729574, EPI_ISL_729575, EPI_ISL_729576, EPI_ISL_729577, EPI_ISL_729580                                                 | A. Krumbholz, Labor Dr. Krause und Kollegen MVZ GmbH, Kiel                                                                                                            | Charité Universitätsmedizin Berlin, Institut für Virologie                                                                                                                                                                                                                                                                                                               | Victor M Corman, Barbara Mühlemann, Jörn Behem-Schwarzbach, Talitha Veith, Julia Schneider, Terry Jones, Christian Drosten                                                                                                                                                                                                                                                                |
| EPI_ISL_729739, EPI_ISL_729774, EPI_ISL_729775                                                                                 | Grubaugh Lab - Yale School of Public Health                                                                                                                           | Grubaugh Lab - Yale School of Public Health                                                                                                                                                                                                                                                                                                                              | Joseph Fauver, Tara Alpert, Anderson Brito, Annie Watkins, Anne Wylie, Chantal Vogels, Mary Petrone, Chaney Kalinich, Isabel Ott, Arnao Casanovas, Catherine Muenker, Adam Moore, Alice Lu, Maria Tokuyama, Patrick Wong, Peiwen Lu, Saad Omer, Richard Martinello, Allison Nelson, Shelli Farhadian, Akiko Iwasaki, Charlese Dela Cruz, Albert Ko, Nathan Grubaugh                       |
| EPI_ISL_729777                                                                                                                 | Yale Pathology Lab                                                                                                                                                    | Grubaugh Lab - Yale School of Public Health                                                                                                                                                                                                                                                                                                                              | Joseph Fauver, Tara Alpert, Anderson Brito, Annie Watkins, Anne Wylie, Chantal Vogels, Mary Petrone, Chaney Kalinich, Isabel Ott, Arnao Casanovas, Catherine Muenker, Adam Moore, Alice Lu, Maria Tokuyama, Patrick Wong, Peiwen Lu, Saad Omer, Richard Martinello, Allison Nelson, Shelli Farhadian, Akiko Iwasaki, Charlese Dela Cruz, Albert Ko, Nathan Grubaugh                       |

|                                                                                                                                                                                                                                                                                                                                                                                                                                                                                                                                                                                                                                                                                                                                                                                                                                                                                                                                                                                                                                                                                                                                                                                                                                                                                                                                                                                                                                                                                                                                                                                                                                |                                                                                                                                                                                                                |                                                                                                                                                                                               |                                                                                                                                                                                                                                                                                                                                                                                                                                                                         |
|--------------------------------------------------------------------------------------------------------------------------------------------------------------------------------------------------------------------------------------------------------------------------------------------------------------------------------------------------------------------------------------------------------------------------------------------------------------------------------------------------------------------------------------------------------------------------------------------------------------------------------------------------------------------------------------------------------------------------------------------------------------------------------------------------------------------------------------------------------------------------------------------------------------------------------------------------------------------------------------------------------------------------------------------------------------------------------------------------------------------------------------------------------------------------------------------------------------------------------------------------------------------------------------------------------------------------------------------------------------------------------------------------------------------------------------------------------------------------------------------------------------------------------------------------------------------------------------------------------------------------------|----------------------------------------------------------------------------------------------------------------------------------------------------------------------------------------------------------------|-----------------------------------------------------------------------------------------------------------------------------------------------------------------------------------------------|-------------------------------------------------------------------------------------------------------------------------------------------------------------------------------------------------------------------------------------------------------------------------------------------------------------------------------------------------------------------------------------------------------------------------------------------------------------------------|
| EPI_ISL_730055                                                                                                                                                                                                                                                                                                                                                                                                                                                                                                                                                                                                                                                                                                                                                                                                                                                                                                                                                                                                                                                                                                                                                                                                                                                                                                                                                                                                                                                                                                                                                                                                                 | Connecticut Department of Health                                                                                                                                                                               | Grubaugh Lab - Yale School of Public Health                                                                                                                                                   | Joseph Fauver, Tara Alpert, Anderson Brito, Annie Watkins, Anne Wyllie, Chantal Vogels, Mary Petrone, Chaney Kalinich, Isabel Ott, Arnu Casanovas, Catherine Muenker, Adam Moore, Alice Lu, Maria Tokuyama, Patrick Wong, Peiwen Lu, Saad Omer, Richard Martinello, Allison Nelson, Shelli Farhadian, Akiko Iwasaki, Charlese Dela Cruz, Albert Ko, Nathan Grubaugh                                                                                                     |
| EPI_ISL_730111, EPI_ISL_730169, EPI_ISL_730188                                                                                                                                                                                                                                                                                                                                                                                                                                                                                                                                                                                                                                                                                                                                                                                                                                                                                                                                                                                                                                                                                                                                                                                                                                                                                                                                                                                                                                                                                                                                                                                 | San Diego County Public Health Laboratory                                                                                                                                                                      | Andersen lab at Scripps Research                                                                                                                                                              | SEARCH Alliance San Diego with Tracy Basler, Jovan Shephard, Brett Austin                                                                                                                                                                                                                                                                                                                                                                                               |
| EPI_ISL_730438                                                                                                                                                                                                                                                                                                                                                                                                                                                                                                                                                                                                                                                                                                                                                                                                                                                                                                                                                                                                                                                                                                                                                                                                                                                                                                                                                                                                                                                                                                                                                                                                                 | Biolab Diagnostic Laboratories                                                                                                                                                                                 | Andersen lab at Scripps Research                                                                                                                                                              | Issa Abu-Dayyeh, Ahmad Tibi, Lama Hussein, Lina Mohammad, Zein Naber, Amid Abdelnour with SEARCH Alliance San Diego                                                                                                                                                                                                                                                                                                                                                     |
| EPI_ISL_732665                                                                                                                                                                                                                                                                                                                                                                                                                                                                                                                                                                                                                                                                                                                                                                                                                                                                                                                                                                                                                                                                                                                                                                                                                                                                                                                                                                                                                                                                                                                                                                                                                 | Molecular diagnostic laboratory of Federal Budget Institution of Science "Central Research Institute of Epidemiology" of The Federal Service on Customers' Rights Protection and Human Well-being Surveillance | Group of Genomics and Postgenomic Technologies of Central Research Institute of Epidemiology                                                                                                  | Samoilov AE, Kaptelova VV, Dudorova AV, Korneenko EV, Saenko SS, Speranskaya AS, Tivanova EV, Shipulina OY, Akimkin VG                                                                                                                                                                                                                                                                                                                                                  |
| EPI_ISL_732737                                                                                                                                                                                                                                                                                                                                                                                                                                                                                                                                                                                                                                                                                                                                                                                                                                                                                                                                                                                                                                                                                                                                                                                                                                                                                                                                                                                                                                                                                                                                                                                                                 | New Mexico Department of Health Scientific Laboratory                                                                                                                                                          | New Mexico Department of Health Scientific Laboratory                                                                                                                                         | Ellie Johnson, Anastacia Griego-Fisher, D'Eldra Malone                                                                                                                                                                                                                                                                                                                                                                                                                  |
| EPI_ISL_732798                                                                                                                                                                                                                                                                                                                                                                                                                                                                                                                                                                                                                                                                                                                                                                                                                                                                                                                                                                                                                                                                                                                                                                                                                                                                                                                                                                                                                                                                                                                                                                                                                 | Centro de Investigación Biomédica de La Rioja - Hospital San Pedro Logroño                                                                                                                                     | SeqCOVID-SPAIN consortium/IBV(CSIC)                                                                                                                                                           | María de Toro, José Manuel Azcona Gutiérrez, María Pilar Bea Escudero, Miriam Blasco Alberdi and SeqCOVID-SPAIN consortium                                                                                                                                                                                                                                                                                                                                              |
| EPI_ISL_733075                                                                                                                                                                                                                                                                                                                                                                                                                                                                                                                                                                                                                                                                                                                                                                                                                                                                                                                                                                                                                                                                                                                                                                                                                                                                                                                                                                                                                                                                                                                                                                                                                 | HELIX LLC                                                                                                                                                                                                      | WHO National Influenza Centre Russian Federation                                                                                                                                              | Andrey Komissarov, Artem Fadeev, Anna Ivanova, Kseniya Komissarova, Dmitry Bazhenov, Daria Danilenko, Ksenia Safina, Elena Nabieva, Georgii Bazkyin, Dmitry Lioznov                                                                                                                                                                                                                                                                                                     |
| EPI_ISL_734215                                                                                                                                                                                                                                                                                                                                                                                                                                                                                                                                                                                                                                                                                                                                                                                                                                                                                                                                                                                                                                                                                                                                                                                                                                                                                                                                                                                                                                                                                                                                                                                                                 | Virginia Division of Consolidated Laboratory Services (DCLS)                                                                                                                                                   | Virginia Division of Consolidated Laboratory Services (DCLS)                                                                                                                                  | Virginia DCLS                                                                                                                                                                                                                                                                                                                                                                                                                                                           |
| EPI_ISL_734289, EPI_ISL_734292, EPI_ISL_734293, EPI_ISL_734294, EPI_ISL_734295, EPI_ISL_734309, EPI_ISL_734312, EPI_ISL_734313, EPI_ISL_734314, EPI_ISL_734316, EPI_ISL_734319, EPI_ISL_734320, EPI_ISL_734321, EPI_ISL_734322, EPI_ISL_734323, EPI_ISL_734324, EPI_ISL_734325, EPI_ISL_734326, EPI_ISL_734327, EPI_ISL_734328, EPI_ISL_734329, EPI_ISL_734330, EPI_ISL_734333, EPI_ISL_734334, EPI_ISL_734335, EPI_ISL_734348, EPI_ISL_734349, EPI_ISL_734350, EPI_ISL_734351, EPI_ISL_734352, EPI_ISL_734353, EPI_ISL_734368, EPI_ISL_734369, EPI_ISL_734370, EPI_ISL_734372, EPI_ISL_734388, EPI_ISL_734404, EPI_ISL_734406, EPI_ISL_734407, EPI_ISL_734410, EPI_ISL_734411, EPI_ISL_734412, EPI_ISL_734414, EPI_ISL_734415, EPI_ISL_734419, EPI_ISL_734420, EPI_ISL_734427, EPI_ISL_734446                                                                                                                                                                                                                                                                                                                                                                                                                                                                                                                                                                                                                                                                                                                                                                                                                                 | Wadsworth Center, New York State Department.of Health                                                                                                                                                          | Kirsten St. George, Daryl M. Lamson, Alexis Russel, Jonathan Plitnick, Navjot Singh, John Kelly, Sara Griesemer, Erasmus Schneider, Erica Lasek-Nesselquist                                   |                                                                                                                                                                                                                                                                                                                                                                                                                                                                         |
| see above                                                                                                                                                                                                                                                                                                                                                                                                                                                                                                                                                                                                                                                                                                                                                                                                                                                                                                                                                                                                                                                                                                                                                                                                                                                                                                                                                                                                                                                                                                                                                                                                                      | Wadsworth Center, New York State Department.of Health                                                                                                                                                          | Wadsworth Center, New York State Department.of Health                                                                                                                                         | Kirsten St. George, Daryl M. Lamson, Alexis Russel, Jonathan Plitnick, Navjot Singh, John Kelly, Sara Griesemer, Erasmus Schneider, Erica Lasek-Nesselquist                                                                                                                                                                                                                                                                                                             |
| EPI_ISL_734447, EPI_ISL_734448, EPI_ISL_734449, EPI_ISL_734450, EPI_ISL_734451, EPI_ISL_734452, EPI_ISL_734460, EPI_ISL_734461, EPI_ISL_734462, EPI_ISL_734470, EPI_ISL_734471, EPI_ISL_734472, EPI_ISL_734473, EPI_ISL_734474, EPI_ISL_734481                                                                                                                                                                                                                                                                                                                                                                                                                                                                                                                                                                                                                                                                                                                                                                                                                                                                                                                                                                                                                                                                                                                                                                                                                                                                                                                                                                                 | Masonic Medical Research Institute                                                                                                                                                                             | Wadsworth Center, New York State Department.of Health                                                                                                                                         | Kirsten St. George, Nathan Tucker, Ryan D. Pfeiffer, Daryl M. Lamson, Alexis Russel, Jonathan Plitnick, Navjot Singh, John Kelly, Sara Griesemer, Erasmus Schneider, Erica Lasek-Nesselquist                                                                                                                                                                                                                                                                            |
| EPI_ISL_735502                                                                                                                                                                                                                                                                                                                                                                                                                                                                                                                                                                                                                                                                                                                                                                                                                                                                                                                                                                                                                                                                                                                                                                                                                                                                                                                                                                                                                                                                                                                                                                                                                 | Abdul Malek Ukil Medical College, Noakhali                                                                                                                                                                     | Central Biological Research Laboratory and Department of Biochemistry and Molecular Biology                                                                                                   | H. M. Abdullah Al Masud, Mohammad Omar Faruque, Sajib Rudra, Md. Khondakar Razzur Rahman, Imam Hossen, Md. Arif Hossain, Shanta Paul, Md. Omer Faruq, Md. Imranul Hoq, Robiul Hasan Bhuiyan                                                                                                                                                                                                                                                                             |
| EPI_ISL_737201                                                                                                                                                                                                                                                                                                                                                                                                                                                                                                                                                                                                                                                                                                                                                                                                                                                                                                                                                                                                                                                                                                                                                                                                                                                                                                                                                                                                                                                                                                                                                                                                                 | National Reference Laboratory, Nigeria Centre for Disease Control.                                                                                                                                             | National Reference Laboratory, Nigeria Centre for Disease Control, Gaduwa, Abuja, Nigeria                                                                                                     | Dr Ndodo Nnaemeka, Olusola Akanbi, Chimaobi Chukwu, Dr Adesuyi Omoare, oluwaseyi Ajegbe, Grace Esebanmen, Nwando Mba, Shirlee Wohl, Anthony Ahumibe, Celestina Obiekea, Catherine Okoi, Akinpelu Afolabi, Kingsley Njoku, Dr Sikiru Badaru, Dr Chinwe Ochu, Dr Chikwe Ihekweazu                                                                                                                                                                                         |
| EPI_ISL_737925, EPI_ISL_737926                                                                                                                                                                                                                                                                                                                                                                                                                                                                                                                                                                                                                                                                                                                                                                                                                                                                                                                                                                                                                                                                                                                                                                                                                                                                                                                                                                                                                                                                                                                                                                                                 | Viollier AG                                                                                                                                                                                                    | Department of Biosystems Science and Engineering, ETH Zürich                                                                                                                                  | Chaoran Chen, Sarah Nadeau, Catharine Aquino, Ivan Topolsky, Philipp Jablonski, Lara Fuhrmann, David Dreifuss, Katharina Jahn, Andrea Cabral de Gouvea, Maria Domenica Moccia, Simon Grüter, Timothy Sykes, Lennart Opitz, Griffin White, Laura Neff, Doris Popovic, Andrea Patrignani, Jay Tracy, Ralph Schlapbach, Christiane Beckmann, Maurice Redondo, Olivier Kobel, Christoph Noppen, Sophie Seidel, Noemie Santamaria de Souza, Niko Beerenwinkel, Tanja Stadler |
| EPI_ISL_738567, EPI_ISL_738591                                                                                                                                                                                                                                                                                                                                                                                                                                                                                                                                                                                                                                                                                                                                                                                                                                                                                                                                                                                                                                                                                                                                                                                                                                                                                                                                                                                                                                                                                                                                                                                                 | Renegade                                                                                                                                                                                                       | Chan-Zuckerberg Biohub                                                                                                                                                                        | CZB Cliahub Consortium                                                                                                                                                                                                                                                                                                                                                                                                                                                  |
| EPI_ISL_739285                                                                                                                                                                                                                                                                                                                                                                                                                                                                                                                                                                                                                                                                                                                                                                                                                                                                                                                                                                                                                                                                                                                                                                                                                                                                                                                                                                                                                                                                                                                                                                                                                 | Alameda County Public Health Lab                                                                                                                                                                               | Chan-Zuckerberg Biohub                                                                                                                                                                        | CZB Cliahub Consortium                                                                                                                                                                                                                                                                                                                                                                                                                                                  |
| EPI_ISL_740863, EPI_ISL_740864, EPI_ISL_740870, EPI_ISL_740873                                                                                                                                                                                                                                                                                                                                                                                                                                                                                                                                                                                                                                                                                                                                                                                                                                                                                                                                                                                                                                                                                                                                                                                                                                                                                                                                                                                                                                                                                                                                                                 | South Eastern Area Laboratory Services (SEALS)                                                                                                                                                                 | NSW Health Pathology - Institute of Clinical Pathology and Medical Research; Westmead Hospital; University of Sydney                                                                          | CIDM-PH et al.                                                                                                                                                                                                                                                                                                                                                                                                                                                          |
| EPI_ISL_746492, EPI_ISL_746508, EPI_ISL_746536, EPI_ISL_746568, EPI_ISL_746581, EPI_ISL_746602, EPI_ISL_746607, EPI_ISL_746625, EPI_ISL_746632, EPI_ISL_746642                                                                                                                                                                                                                                                                                                                                                                                                                                                                                                                                                                                                                                                                                                                                                                                                                                                                                                                                                                                                                                                                                                                                                                                                                                                                                                                                                                                                                                                                 | Genetica Molecular and Subdepartamento de Virologia ISP Chile                                                                                                                                                  | Instituto de Salud Publica de Chile                                                                                                                                                           | Javier Tognarelli, Barbara Parra, Loredana Arata, Jaime Lagos, Gisselle Barra, Patricia Bustos, Rodrigo Fasce, Andres Castillo, Jorge Fernandez                                                                                                                                                                                                                                                                                                                         |
| EPI_ISL_747081, EPI_ISL_747157                                                                                                                                                                                                                                                                                                                                                                                                                                                                                                                                                                                                                                                                                                                                                                                                                                                                                                                                                                                                                                                                                                                                                                                                                                                                                                                                                                                                                                                                                                                                                                                                 | Respiratory Viruses Branch, Centers for Disease Control and Prevention                                                                                                                                         | Respiratory Viruses Branch, Centers for Disease Control and Prevention                                                                                                                        | Queen,K., Li,Y., Tao,Y., Uehara,A., Montmayeur,A., Paden,C.R., Cook,P.W., Marine,R., Sheth,M., Wang,H., Lee,J., Tong,S.                                                                                                                                                                                                                                                                                                                                                 |
| EPI_ISL_751679                                                                                                                                                                                                                                                                                                                                                                                                                                                                                                                                                                                                                                                                                                                                                                                                                                                                                                                                                                                                                                                                                                                                                                                                                                                                                                                                                                                                                                                                                                                                                                                                                 | MS Public Health Laboratory                                                                                                                                                                                    | Genomics and Discovery, Respiratory Viruses Branch, Division of Viral Diseases, Centers for Disease Control and Prevention                                                                    | Krista Queen, Yan Li, Ying Tao, Jing Zhang, Anna Uehara, Anna Montmayeur, Clinton R. Paden, Peter W. Cook, Rachel Marine, Mili Sheth, Haibin Wang, Justin Lee, Suxiang Tong                                                                                                                                                                                                                                                                                             |
| EPI_ISL_751706                                                                                                                                                                                                                                                                                                                                                                                                                                                                                                                                                                                                                                                                                                                                                                                                                                                                                                                                                                                                                                                                                                                                                                                                                                                                                                                                                                                                                                                                                                                                                                                                                 | CT-Dr. Katherine A. Kelley State Public Health Lab                                                                                                                                                             | Genomics and Discovery, Respiratory Viruses Branch, Division of Viral Diseases, Centers for Disease Control and Prevention                                                                    | Krista Queen, Yan Li, Ying Tao, Jing Zhang, Anna Uehara, Anna Montmayeur, Clinton R. Paden, Peter W. Cook, Rachel Marine, Mili Sheth, Haibin Wang, Justin Lee, Suxiang Tong                                                                                                                                                                                                                                                                                             |
| EPI_ISL_753214                                                                                                                                                                                                                                                                                                                                                                                                                                                                                                                                                                                                                                                                                                                                                                                                                                                                                                                                                                                                                                                                                                                                                                                                                                                                                                                                                                                                                                                                                                                                                                                                                 | State Laboratories Division, Hawaii State Department of Health                                                                                                                                                 | State Laboratories Division, Hawaii State Department of Health                                                                                                                                | Pamela O'Brien, Sabrina Diemert, Drew Kuwazaki, Razvan Sultana, Edward Desmond                                                                                                                                                                                                                                                                                                                                                                                          |
| EPI_ISL_753272, EPI_ISL_753313, EPI_ISL_753316, EPI_ISL_753317, EPI_ISL_753350                                                                                                                                                                                                                                                                                                                                                                                                                                                                                                                                                                                                                                                                                                                                                                                                                                                                                                                                                                                                                                                                                                                                                                                                                                                                                                                                                                                                                                                                                                                                                 | Clinical virology Laboratory, Children's Hospital Los Angeles                                                                                                                                                  | Center for Personalized Medicine, Children's Hospital Los Angeles                                                                                                                             | Gai et al                                                                                                                                                                                                                                                                                                                                                                                                                                                               |
| EPI_ISL_754124                                                                                                                                                                                                                                                                                                                                                                                                                                                                                                                                                                                                                                                                                                                                                                                                                                                                                                                                                                                                                                                                                                                                                                                                                                                                                                                                                                                                                                                                                                                                                                                                                 | USC Clinical Lab                                                                                                                                                                                               | Los Angeles County PHL                                                                                                                                                                        | P. Hemarajata et al.                                                                                                                                                                                                                                                                                                                                                                                                                                                    |
| EPI_ISL_754396, EPI_ISL_754398, EPI_ISL_754399, EPI_ISL_754400, EPI_ISL_754401, EPI_ISL_754402, EPI_ISL_754403, EPI_ISL_754405, EPI_ISL_754406, EPI_ISL_754407, EPI_ISL_754409, EPI_ISL_754410, EPI_ISL_754411, EPI_ISL_754417, EPI_ISL_754419, EPI_ISL_754421, EPI_ISL_754428, EPI_ISL_754431, EPI_ISL_754432, EPI_ISL_754438, EPI_ISL_754439, EPI_ISL_754440, EPI_ISL_754444, EPI_ISL_754447, EPI_ISL_754449, EPI_ISL_754457, EPI_ISL_754458, EPI_ISL_754459, EPI_ISL_754460, EPI_ISL_754469, EPI_ISL_754477, EPI_ISL_754478, EPI_ISL_754482, EPI_ISL_754483, EPI_ISL_754484, EPI_ISL_754485, EPI_ISL_754487, EPI_ISL_754488, EPI_ISL_754489, EPI_ISL_754490, EPI_ISL_754491, EPI_ISL_754495, EPI_ISL_754498, EPI_ISL_754499, EPI_ISL_754500, EPI_ISL_754501, EPI_ISL_754502, EPI_ISL_754503, EPI_ISL_754505, EPI_ISL_754506, EPI_ISL_754507, EPI_ISL_754508, EPI_ISL_754509, EPI_ISL_754510, EPI_ISL_754511, EPI_ISL_754512, EPI_ISL_754513, EPI_ISL_754516, EPI_ISL_754522, EPI_ISL_754523, EPI_ISL_754524, EPI_ISL_754525, EPI_ISL_754527, EPI_ISL_754528, EPI_ISL_754529, EPI_ISL_754530, EPI_ISL_754531, EPI_ISL_754532, EPI_ISL_754533, EPI_ISL_754534, EPI_ISL_754535, EPI_ISL_754538, EPI_ISL_754541, EPI_ISL_754542, EPI_ISL_754543, EPI_ISL_754555, EPI_ISL_754560, EPI_ISL_754566, EPI_ISL_754571, EPI_ISL_754573, EPI_ISL_754574, EPI_ISL_754575, EPI_ISL_754576, EPI_ISL_754577, EPI_ISL_754578, EPI_ISL_754579, EPI_ISL_754580, EPI_ISL_754581, EPI_ISL_754582, EPI_ISL_754583, EPI_ISL_754584, EPI_ISL_754587, EPI_ISL_754589, EPI_ISL_754590, EPI_ISL_754591, EPI_ISL_754600, EPI_ISL_754617, EPI_ISL_754618 | Wadsworth Center, New York State Department.of Health                                                                                                                                                          | Kirsten St. George, Daryl M. Lamson, Alexis Russel, Matthew Shudt, Melissa A Leisner, Jonathan Plitnick, Navjot Singh, John Kelly, Sara Griesemer, Erasmus Schneider, Erica Lasek-Nesselquist |                                                                                                                                                                                                                                                                                                                                                                                                                                                                         |
| see above                                                                                                                                                                                                                                                                                                                                                                                                                                                                                                                                                                                                                                                                                                                                                                                                                                                                                                                                                                                                                                                                                                                                                                                                                                                                                                                                                                                                                                                                                                                                                                                                                      | Wadsworth Center, New York State Department.of Health                                                                                                                                                          | Wadsworth Center, New York State Department.of Health                                                                                                                                         | Kirsten St. George, Daryl M. Lamson, Alexis Russel, Matthew Shudt, Melissa A Leisner, Jonathan Plitnick, Navjot Singh, John Kelly, Sara Griesemer, Erasmus Schneider, Erica Lasek-Nesselquist                                                                                                                                                                                                                                                                           |
| EPI_ISL_754645                                                                                                                                                                                                                                                                                                                                                                                                                                                                                                                                                                                                                                                                                                                                                                                                                                                                                                                                                                                                                                                                                                                                                                                                                                                                                                                                                                                                                                                                                                                                                                                                                 | University of Wisconsin-Madison AIDS Vaccine Research Laboratories                                                                                                                                             | University of Wisconsin-Madison AIDS Vaccine Research Laboratories                                                                                                                            | Gage Moreno, Katarina Braun, et al. AIDS Vaccine Research Laboratories                                                                                                                                                                                                                                                                                                                                                                                                  |
| EPI_ISL_754691, EPI_ISL_754712, EPI_ISL_754725, EPI_ISL_754726, EPI_ISL_754740, EPI_ISL_754782, EPI_ISL_754795                                                                                                                                                                                                                                                                                                                                                                                                                                                                                                                                                                                                                                                                                                                                                                                                                                                                                                                                                                                                                                                                                                                                                                                                                                                                                                                                                                                                                                                                                                                 | Wadsworth Center, New York State Department.of Health                                                                                                                                                          | Wadsworth Center, New York State Department.of Health                                                                                                                                         | Kirsten St. George, Daryl M. Lamson, Alexis Russel, Matthew Shudt, Melissa A Leisner, Jonathan Plitnick, Navjot Singh, John Kelly, Sara Griesemer, Erasmus Schneider, Erica Lasek-Nesselquist                                                                                                                                                                                                                                                                           |
| EPI_ISL_755276                                                                                                                                                                                                                                                                                                                                                                                                                                                                                                                                                                                                                                                                                                                                                                                                                                                                                                                                                                                                                                                                                                                                                                                                                                                                                                                                                                                                                                                                                                                                                                                                                 | San Diego County Public Health Laboratory                                                                                                                                                                      | Andersen lab at Scripps Research                                                                                                                                                              | SEARCH Alliance San Diego with Tracy Basler, Jovan Shephard, Brett Austin                                                                                                                                                                                                                                                                                                                                                                                               |
| EPI_ISL_755695, EPI_ISL_755895, EPI_ISL_755926                                                                                                                                                                                                                                                                                                                                                                                                                                                                                                                                                                                                                                                                                                                                                                                                                                                                                                                                                                                                                                                                                                                                                                                                                                                                                                                                                                                                                                                                                                                                                                                 | Toronto Invasive Bacterial Diseases Network                                                                                                                                                                    | McMaster University                                                                                                                                                                           | Allison McGeer, Patryk Aftanas, Hooman Derakhshani, Angel Li, Kuganya Nirmalarajah, Emily Panousis, Ahmed Draia, Jalees Nasir, Michael Surette, Samira Mubareka, Andrew G. McArthur                                                                                                                                                                                                                                                                                     |

|                                                                                                                                                                                                                                                                                                                                                                                                                |                                                                                                          |                                                                                                                      |                                                                                                                                                                                                                                                                                                                                                                                                                                                                   |
|----------------------------------------------------------------------------------------------------------------------------------------------------------------------------------------------------------------------------------------------------------------------------------------------------------------------------------------------------------------------------------------------------------------|----------------------------------------------------------------------------------------------------------|----------------------------------------------------------------------------------------------------------------------|-------------------------------------------------------------------------------------------------------------------------------------------------------------------------------------------------------------------------------------------------------------------------------------------------------------------------------------------------------------------------------------------------------------------------------------------------------------------|
| EPI_ISL_757623                                                                                                                                                                                                                                                                                                                                                                                                 | Department of Virus and Microbiological Special Diagnostics, Statens Serum Institut, Copenhagen, Denmark | Albertsen Lab, Department of Chemistry and Bioscience, Aalborg University, Denmark                                   | Danish Covid-19 Genome Consortium                                                                                                                                                                                                                                                                                                                                                                                                                                 |
| EPI_ISL_759749                                                                                                                                                                                                                                                                                                                                                                                                 | University of Wisconsin-Madison AIDS Vaccine Research Laboratories                                       | University of Wisconsin-Madison AIDS Vaccine Research Laboratories                                                   | Gage Moreno, Katarina Braun, et al. AIDS Vaccine Research Laboratories                                                                                                                                                                                                                                                                                                                                                                                            |
| EPI_ISL_759955                                                                                                                                                                                                                                                                                                                                                                                                 | Primasatya Husada Citra Hospital                                                                         | Institute of Tropical Disease, Universitas Airlangga                                                                 | Aldise M Nastri, Jezzy R Dewantari, Rima R Prasetya, Krisnoadi Rahardjo, Pudji Djanuartono, Gatot Soegiarto, Laksmi Wulandari, Resti Yudhawati, Soetjipto, Yasuko Mori, Maria I Lusida, Kazufumi Shimizu                                                                                                                                                                                                                                                          |
| EPI_ISL_765483                                                                                                                                                                                                                                                                                                                                                                                                 | SARATOGA HOSPITAL LABORATORY                                                                             | Wadsworth Center, New York State Department.of Health                                                                | Kirsten St. George, Daryl M. Lamson, Alexis Russel, Matthew Shudt, Melissa A Leisner, Jonathan Plitnick, Navjot Singh, John Kelly, Sara Griesemer, Erasmus Schneider, Erica Lasek-Nesselquist                                                                                                                                                                                                                                                                     |
| EPI_ISL_765489, EPI_ISL_765490, EPI_ISL_765493, EPI_ISL_765494                                                                                                                                                                                                                                                                                                                                                 | MONTEFIORE MEDICAL CENTER LABORATORIES                                                                   | Wadsworth Center, New York State Department.of Health                                                                | Kirsten St. George, Daryl M. Lamson, Alexis Russel, Matthew Shudt, Melissa A Leisner, Jonathan Plitnick, Navjot Singh, John Kelly, Sara Griesemer, Erasmus Schneider, Erica Lasek-Nesselquist                                                                                                                                                                                                                                                                     |
| EPI_ISL_765496, EPI_ISL_765499, EPI_ISL_765500, EPI_ISL_765501, EPI_ISL_765502, EPI_ISL_765504, EPI_ISL_765505, EPI_ISL_765506, EPI_ISL_765508, EPI_ISL_765510, EPI_ISL_765511, EPI_ISL_765514, EPI_ISL_765515, EPI_ISL_765516                                                                                                                                                                                 | see above                                                                                                | Wadsworth Center, New York State Department.of Health                                                                | Wadsworth Center, New York State Department.of Health                                                                                                                                                                                                                                                                                                                                                                                                             |
| EPI_ISL_765520, EPI_ISL_765525                                                                                                                                                                                                                                                                                                                                                                                 | SARATOGA HOSPITAL LABORATORY                                                                             | Wadsworth Center, New York State Department.of Health                                                                | Kirsten St. George, Daryl M. Lamson, Alexis Russel, Matthew Shudt, Melissa A Leisner, Jonathan Plitnick, Navjot Singh, John Kelly, Sara Griesemer, Erasmus Schneider, Erica Lasek-Nesselquist                                                                                                                                                                                                                                                                     |
| EPI_ISL_765534, EPI_ISL_765539, EPI_ISL_765542, EPI_ISL_765545, EPI_ISL_765547, EPI_ISL_765549, EPI_ISL_765551, EPI_ISL_765552, EPI_ISL_765553, EPI_ISL_765557, EPI_ISL_765559, EPI_ISL_765560                                                                                                                                                                                                                 | see above                                                                                                | MONTEFIORE MEDICAL CENTER LABORATORIES                                                                               | Wadsworth Center, New York State Department.of Health                                                                                                                                                                                                                                                                                                                                                                                                             |
| EPI_ISL_765886                                                                                                                                                                                                                                                                                                                                                                                                 | Massachusetts General Hospital                                                                           | Infectious Disease Program, Broad Institute of Harvard and MIT                                                       | Lemieux,J.E., Siddle,K.J., Shaw,B., Adams,G., Pierce,V., Turbett,S., Anahtar,M., Branda,J., Slater,D., Harris,J., Lin,A.E., Gladden-Young,A., Lagerborg,K., Rudy,M., DeRuff,K., Carter,A., Normandin,E., Bauer,M., Reilly,S., Tomkins-Tinch,C., Loreth,C., Chaluvadi,S., Neumann,A., Cusick,C., Chapman,S.B., Gnirke,A., Flowers,K., Cerrato,F., Birren,B.W., Gallagher,G., Smole,S., Park,D.J., MacInnis,B.L., Ryan,E., LaRoque,R., Rosenberg,E. and Sabeti,P.C. |
| EPI_ISL_765959                                                                                                                                                                                                                                                                                                                                                                                                 | Worobey Lab, Department of Ecology and Evolutionary Biology, University of Arizona                       | Worobey Lab, Department of Ecology and Evolutionary Biology, University of Arizona                                   | Brendan Larsen, Grace Quirk, Thomas Watts, David Baltrus, Michael Worobey                                                                                                                                                                                                                                                                                                                                                                                         |
| EPI_ISL_766645                                                                                                                                                                                                                                                                                                                                                                                                 | Barnakuten                                                                                               | The Public Health Agency of Sweden                                                                                   | Department of Microbiology, The Public Health Agency of Sweden                                                                                                                                                                                                                                                                                                                                                                                                    |
| EPI_ISL_766677                                                                                                                                                                                                                                                                                                                                                                                                 | Texas Department of State Health Services                                                                | Texas Department of State Health Services                                                                            | Rashmi Tuladhar, Bonnie Oh, Jenny Zhang, Maliha Rahman, Anita Pokharel, Myong Koag, Chung Wang, Rachel Lee, Grace Kubin, Mayela Pedruza, James Daniel Bonser                                                                                                                                                                                                                                                                                                      |
| EPI_ISL_766890, EPI_ISL_766923                                                                                                                                                                                                                                                                                                                                                                                 | New Mexico Department of Health Scientific Laboratory                                                    | New Mexico Department of Health Scientific Laboratory                                                                | D'eldra Malone, Ellie Johnson, Anastacia Griego-Fisher                                                                                                                                                                                                                                                                                                                                                                                                            |
| EPI_ISL_767419                                                                                                                                                                                                                                                                                                                                                                                                 | URMC LABS                                                                                                | Wadsworth Center, New York State Department.of Health                                                                | Kirsten St. George, Daryl M. Lamson, Alexis Russel, Matthew Shudt, Melissa A Leisner, Jonathan Plitnick, Navjot Singh, John Kelly, Sara Griesemer, Erasmus Schneider, Erica Lasek-Nesselquist                                                                                                                                                                                                                                                                     |
| EPI_ISL_767420, EPI_ISL_767421, EPI_ISL_767425, EPI_ISL_767427, EPI_ISL_767428, EPI_ISL_767437, EPI_ISL_767438, EPI_ISL_767447, EPI_ISL_767450, EPI_ISL_767452, EPI_ISL_767454, EPI_ISL_767455, EPI_ISL_767477, EPI_ISL_767485, EPI_ISL_767487, EPI_ISL_767489, EPI_ISL_767498, EPI_ISL_767501, EPI_ISL_767516, EPI_ISL_767521, EPI_ISL_767526, EPI_ISL_767531, EPI_ISL_767532, EPI_ISL_767534, EPI_ISL_767537 | see above                                                                                                | Wadsworth Center, New York State Department.of Health                                                                | Wadsworth Center, New York State Department.of Health                                                                                                                                                                                                                                                                                                                                                                                                             |
| EPI_ISL_767545, EPI_ISL_767569, EPI_ISL_767576                                                                                                                                                                                                                                                                                                                                                                 | URMC LABS                                                                                                | Wadsworth Center, New York State Department.of Health                                                                | Kirsten St. George, Daryl M. Lamson, Alexis Russel, Matthew Shudt, Melissa A Leisner, Jonathan Plitnick, Navjot Singh, John Kelly, Sara Griesemer, Erasmus Schneider, Erica Lasek-Nesselquist                                                                                                                                                                                                                                                                     |
| EPI_ISL_767582                                                                                                                                                                                                                                                                                                                                                                                                 | WHITE PLAINS HOSPITAL CENTER LABORATORY                                                                  | Wadsworth Center, New York State Department.of Health                                                                | Kirsten St. George, Daryl M. Lamson, Alexis Russel, Matthew Shudt, Melissa A Leisner, Jonathan Plitnick, Navjot Singh, John Kelly, Sara Griesemer, Erasmus Schneider, Erica Lasek-Nesselquist                                                                                                                                                                                                                                                                     |
| EPI_ISL_767583                                                                                                                                                                                                                                                                                                                                                                                                 | MEMORIAL SLOAN KETTERING CANCER CENTER                                                                   | Wadsworth Center, New York State Department.of Health                                                                | Kirsten St. George, Daryl M. Lamson, Alexis Russel, Matthew Shudt, Melissa A Leisner, Jonathan Plitnick, Navjot Singh, John Kelly, Sara Griesemer, Erasmus Schneider, Erica Lasek-Nesselquist                                                                                                                                                                                                                                                                     |
| EPI_ISL_767584                                                                                                                                                                                                                                                                                                                                                                                                 | WHITE PLAINS HOSPITAL CENTER LABORATORY                                                                  | Wadsworth Center, New York State Department.of Health                                                                | Kirsten St. George, Daryl M. Lamson, Alexis Russel, Matthew Shudt, Melissa A Leisner, Jonathan Plitnick, Navjot Singh, John Kelly, Sara Griesemer, Erasmus Schneider, Erica Lasek-Nesselquist                                                                                                                                                                                                                                                                     |
| EPI_ISL_767589                                                                                                                                                                                                                                                                                                                                                                                                 | SARATOGA HOSPITAL LABORATORY                                                                             | Wadsworth Center, New York State Department.of Health                                                                | Kirsten St. George, Daryl M. Lamson, Alexis Russel, Matthew Shudt, Melissa A Leisner, Jonathan Plitnick, Navjot Singh, John Kelly, Sara Griesemer, Erasmus Schneider, Erica Lasek-Nesselquist                                                                                                                                                                                                                                                                     |
| EPI_ISL_767590                                                                                                                                                                                                                                                                                                                                                                                                 | WHITE PLAINS HOSPITAL CENTER LABORATORY                                                                  | Wadsworth Center, New York State Department.of Health                                                                | Kirsten St. George, Daryl M. Lamson, Alexis Russel, Matthew Shudt, Melissa A Leisner, Jonathan Plitnick, Navjot Singh, John Kelly, Sara Griesemer, Erasmus Schneider, Erica Lasek-Nesselquist                                                                                                                                                                                                                                                                     |
| EPI_ISL_767592, EPI_ISL_767593                                                                                                                                                                                                                                                                                                                                                                                 | MEMORIAL SLOAN KETTERING CANCER CENTER                                                                   | Wadsworth Center, New York State Department.of Health                                                                | Kirsten St. George, Daryl M. Lamson, Alexis Russel, Matthew Shudt, Melissa A Leisner, Jonathan Plitnick, Navjot Singh, John Kelly, Sara Griesemer, Erasmus Schneider, Erica Lasek-Nesselquist                                                                                                                                                                                                                                                                     |
| EPI_ISL_767594                                                                                                                                                                                                                                                                                                                                                                                                 | SARATOGA HOSPITAL LABORATORY                                                                             | Wadsworth Center, New York State Department.of Health                                                                | Kirsten St. George, Daryl M. Lamson, Alexis Russel, Matthew Shudt, Melissa A Leisner, Jonathan Plitnick, Navjot Singh, John Kelly, Sara Griesemer, Erasmus Schneider, Erica Lasek-Nesselquist                                                                                                                                                                                                                                                                     |
| EPI_ISL_767596                                                                                                                                                                                                                                                                                                                                                                                                 | MEMORIAL SLOAN KETTERING CANCER CENTER                                                                   | Wadsworth Center, New York State Department.of Health                                                                | Kirsten St. George, Daryl M. Lamson, Alexis Russel, Matthew Shudt, Melissa A Leisner, Jonathan Plitnick, Navjot Singh, John Kelly, Sara Griesemer, Erasmus Schneider, Erica Lasek-Nesselquist                                                                                                                                                                                                                                                                     |
| EPI_ISL_767620, EPI_ISL_767621, EPI_ISL_767622, EPI_ISL_767624, EPI_ISL_767627                                                                                                                                                                                                                                                                                                                                 | WHITE PLAINS HOSPITAL CENTER LABORATORY                                                                  | Wadsworth Center, New York State Department.of Health                                                                | Kirsten St. George, Daryl M. Lamson, Alexis Russel, Matthew Shudt, Melissa A Leisner, Jonathan Plitnick, Navjot Singh, John Kelly, Sara Griesemer, Erasmus Schneider, Erica Lasek-Nesselquist                                                                                                                                                                                                                                                                     |
| EPI_ISL_767629, EPI_ISL_767631, EPI_ISL_767633, EPI_ISL_767642, EPI_ISL_767645, EPI_ISL_767646, EPI_ISL_767649                                                                                                                                                                                                                                                                                                 | MEMORIAL SLOAN KETTERING CANCER CENTER                                                                   | Wadsworth Center, New York State Department.of Health                                                                | Kirsten St. George, Daryl M. Lamson, Alexis Russel, Matthew Shudt, Melissa A Leisner, Jonathan Plitnick, Navjot Singh, John Kelly, Sara Griesemer, Erasmus Schneider, Erica Lasek-Nesselquist                                                                                                                                                                                                                                                                     |
| EPI_ISL_767650                                                                                                                                                                                                                                                                                                                                                                                                 | BIO-REFERENCE LABORATORIES                                                                               | Wadsworth Center, New York State Department.of Health                                                                | Kirsten St. George, Daryl M. Lamson, Alexis Russel, Matthew Shudt, Melissa A Leisner, Jonathan Plitnick, Navjot Singh, John Kelly, Sara Griesemer, Erasmus Schneider, Erica Lasek-Nesselquist                                                                                                                                                                                                                                                                     |
| EPI_ISL_767657                                                                                                                                                                                                                                                                                                                                                                                                 | MEMORIAL SLOAN KETTERING CANCER CENTER                                                                   | Wadsworth Center, New York State Department.of Health                                                                | Kirsten St. George, Daryl M. Lamson, Alexis Russel, Matthew Shudt, Melissa A Leisner, Jonathan Plitnick, Navjot Singh, John Kelly, Sara Griesemer, Erasmus Schneider, Erica Lasek-Nesselquist                                                                                                                                                                                                                                                                     |
| EPI_ISL_767671                                                                                                                                                                                                                                                                                                                                                                                                 | BIO-REFERENCE LABORATORIES                                                                               | Wadsworth Center, New York State Department.of Health                                                                | Kirsten St. George, Daryl M. Lamson, Alexis Russel, Matthew Shudt, Melissa A Leisner, Jonathan Plitnick, Navjot Singh, John Kelly, Sara Griesemer, Erasmus Schneider, Erica Lasek-Nesselquist                                                                                                                                                                                                                                                                     |
| EPI_ISL_767693, EPI_ISL_767694, EPI_ISL_767699, EPI_ISL_767702, EPI_ISL_767704, EPI_ISL_767708                                                                                                                                                                                                                                                                                                                 | MEMORIAL SLOAN KETTERING CANCER CENTER                                                                   | Wadsworth Center, New York State Department.of Health                                                                | Kirsten St. George, Daryl M. Lamson, Alexis Russel, Matthew Shudt, Melissa A Leisner, Jonathan Plitnick, Navjot Singh, John Kelly, Sara Griesemer, Erasmus Schneider, Erica Lasek-Nesselquist                                                                                                                                                                                                                                                                     |
| EPI_ISL_767864                                                                                                                                                                                                                                                                                                                                                                                                 | Sydney South West Pathology Service (SSWPS) - Royal Prince Alfred Hospital - NSW Health Pathology        | NSW Health Pathology - Institute of Clinical Pathology and Medical Research; Westmead Hospital; University of Sydney | CIDM-PH et al.                                                                                                                                                                                                                                                                                                                                                                                                                                                    |
| EPI_ISL_768074                                                                                                                                                                                                                                                                                                                                                                                                 | Viollier AG                                                                                              | Department of Biosystems Science and Engineering, ETH Zürich                                                         | Chaoran Chen, Sarah Nadeau, Catharine Aquino, Ivan Topolsky, Philipp Jablonski, Lara Fuhrmann, David Dreifuss, Katharina Jahn, Andreia Cabral de Gouvea, Maria Domenica Moccia, Simon Grüter, Timothy Sykes, Lennart Opitz, Griffin White, Laura Neff, Doris Popovic, Andrea Patrignani, Jay Tracy,                                                                                                                                                               |

|                                                                                                                                                                                                                                                                                                                                                                                                                                                |                                                                                                          |                                                                                                                                                                                                 |                                                                                                                                                                                                                                                                                                                                                                                                                                                                              |
|------------------------------------------------------------------------------------------------------------------------------------------------------------------------------------------------------------------------------------------------------------------------------------------------------------------------------------------------------------------------------------------------------------------------------------------------|----------------------------------------------------------------------------------------------------------|-------------------------------------------------------------------------------------------------------------------------------------------------------------------------------------------------|------------------------------------------------------------------------------------------------------------------------------------------------------------------------------------------------------------------------------------------------------------------------------------------------------------------------------------------------------------------------------------------------------------------------------------------------------------------------------|
|                                                                                                                                                                                                                                                                                                                                                                                                                                                |                                                                                                          |                                                                                                                                                                                                 | Ralph Schlapbach, Christiane Beckmann, Maurice Redondo, Olivier Kobel, Christoph Noppen, Sophie Seidel, Noemie Santamaria de Souza, Niko Beerenwinkel, Tanja Stadler                                                                                                                                                                                                                                                                                                         |
| EPI_ISL_768365, EPI_ISL_768480, EPI_ISL_768483, EPI_ISL_768484, EPI_ISL_768485                                                                                                                                                                                                                                                                                                                                                                 | LSUHS Emerging Viral Threat Laboratory                                                                   | Microbial Genome Sequencing Center                                                                                                                                                              | Jeremy P. Kamil, Jennifer L. Carroll, Camille F. Abshire, Maarten Van Diest, Andrew D. Yurchenko, Martin J. Sapp, Rona S. Scott, Christopher G. Kevill, Daniel J. Snyder, Vaughn S. Cooper, John A. Vanchiere                                                                                                                                                                                                                                                                |
| EPI_ISL_768603                                                                                                                                                                                                                                                                                                                                                                                                                                 | South Eastern Area Laboratory Services (SEALS)                                                           | NSW Health Pathology - Institute of Clinical Pathology and Medical Research; Westmead Hospital; University of Sydney                                                                            | CIDM-PH et al.                                                                                                                                                                                                                                                                                                                                                                                                                                                               |
| EPI_ISL_768742                                                                                                                                                                                                                                                                                                                                                                                                                                 | Child Health Research Foundation                                                                         | Child Health Research Foundation                                                                                                                                                                | Senjuti Saha, Afroza Akter Tanni, Roly Malaker, Sharmistha Goswami, Syed Mukhtadir Al Sium, Arif Mohammad Tanmoy, Md Hafizur Rahman, Samir K Saha                                                                                                                                                                                                                                                                                                                            |
| EPI_ISL_769920, EPI_ISL_769925, EPI_ISL_769926, EPI_ISL_769937, EPI_ISL_769941, EPI_ISL_769947, EPI_ISL_769950, EPI_ISL_769955, EPI_ISL_769963, EPI_ISL_769972, EPI_ISL_769973, EPI_ISL_769976                                                                                                                                                                                                                                                 | see above                                                                                                | Albany Medical Center Hospital Clinical Laboratories                                                                                                                                            | Wadsworth Center, New York State Department.of Health                                                                                                                                                                                                                                                                                                                                                                                                                        |
| EPI_ISL_770551                                                                                                                                                                                                                                                                                                                                                                                                                                 | Laboratório de Microbiologia Molecular - Universidade FEEVALE                                            | Bioinformatics Laboratory / LNCC                                                                                                                                                                | Felipe Benites, Fernando Rosado Spilki, Alana Witt Hansen, Juliane Deise Fleck, Juliana Schons, Meriane Demoliner, Ana Karolina Eisen Antunes, Fagner Henrique Heldt, Larissa Mallmann, Bruna Hermann, Ana Luiza Ziulkoski, Victoria Goes, Karoline Schallenberg, Matheus Nunes Weber, Paula Rodrigues de Almeida, Alessandra Pavan Lamarca da Silva, Ronaldo da Silva F Jr., Luiz G P de Almeida, Alexandra L Gerber, Ana Paula de C Guimaraes, Ana Tereza R de Vasconcelos |
| EPI_ISL_770808, EPI_ISL_770809, EPI_ISL_770812                                                                                                                                                                                                                                                                                                                                                                                                 | Essentia Health-St. Mary's Medical Center                                                                | Minnesota Department of Health, Public Health Laboratory                                                                                                                                        | Alexandra Lorentz, Jacob Garfin, Matt Plumb, and Xiong Wang                                                                                                                                                                                                                                                                                                                                                                                                                  |
| EPI_ISL_771302                                                                                                                                                                                                                                                                                                                                                                                                                                 | Colorado Department of Public Health and Environment                                                     | Colorado Department of Puplic Health and Environment                                                                                                                                            | Laura Bankers, Molly C. Hetherington-Rauth, Diana Ir, Shannon Ely, Shannon R. Matzinger, Sarah Elizabeth Totten, Emily A. Travanty                                                                                                                                                                                                                                                                                                                                           |
| EPI_ISL_774965                                                                                                                                                                                                                                                                                                                                                                                                                                 | Designated Reference Institute for Chemical Measurements (DRICM)                                         | DNA SOLUTION LTD.                                                                                                                                                                               | Md. Imran Khan, Kazi Nadim Hasan, Abu Sufian, Jannatun Naima, Abdul Khaleque, Mizanur Rahman, MSM Chowdhury, Hasan Ul Haider, Mamudul Hasan Razu, Mala Khan, Mohammad Fazle Alam Rabbi                                                                                                                                                                                                                                                                                       |
| EPI_ISL_775216                                                                                                                                                                                                                                                                                                                                                                                                                                 | Gonoshasthya-RNA Molecular Research Center                                                               | Gonoshasthya-RNA Molecular Research Center                                                                                                                                                      | Mohd. Raed Jamiruddin, Nihad Adnan, Md. Ahsanul Haq, Mohib Ullah Khondoker, Nafisa Azmuda, Firoz Ahmed, Shahana Sharmin, Salma Akter, Taslin Jahan Mou, Maifuza Marzan, Sayeda Moriam Liza, Nowshin Jahan, Tamanna Ali, Shahad Saif Khandker, Maha Jamiruddin, Mousumi Chaity, Mumtari Jannat Oishee                                                                                                                                                                         |
| EPI_ISL_775217                                                                                                                                                                                                                                                                                                                                                                                                                                 | Gonoshasthya-RNA Molecular Research Center                                                               | Gonoshasthya-RNA Molecular Research Center                                                                                                                                                      | Nihad Adnan, Mohd. Raed Jamiruddin, Md. Ahsanul Haq, Mohib Ullah Khondoker, Nafisa Azmuda, Firoz Ahmed, Shahana Sharmin, Salma Akter, Taslin Jahan Mou, Maifuza Marzan, Sayeda Moriam Liza, Nowshin Jahan, Tamanna Ali, Maha Jamiruddin, Mousumi Chaity, Shahad Saif Khandker, Mumtari Jannat Oishee                                                                                                                                                                         |
| EPI_ISL_776307, EPI_ISL_776407                                                                                                                                                                                                                                                                                                                                                                                                                 | University Medical Center Hamburg Eppendorf                                                              | Heinrich Pette Institute, Leibniz Institute for Experimental Virology                                                                                                                           | Alexis Robitaille, Thomas Günther, Johannes Knobloch, Martin Aepfelbacher, Nicole Fischer, Adam Grundhoff                                                                                                                                                                                                                                                                                                                                                                    |
| EPI_ISL_778886, EPI_ISL_778887                                                                                                                                                                                                                                                                                                                                                                                                                 | Maryland Public Health Laboratory                                                                        | Maryland Public Health Laboratory                                                                                                                                                               | Maryland Department of Health Laboratories Administration                                                                                                                                                                                                                                                                                                                                                                                                                    |
| EPI_ISL_779355                                                                                                                                                                                                                                                                                                                                                                                                                                 | University of Wisconsin-Madison AIDS Vaccine Research Laboratories                                       | University of Wisconsin-Madison AIDS Vaccine Research Laboratories                                                                                                                              | Gage Moreno, Katarina Braun, et al. AIDS Vaccine Research Laboratories                                                                                                                                                                                                                                                                                                                                                                                                       |
| EPI_ISL_780044, EPI_ISL_780047                                                                                                                                                                                                                                                                                                                                                                                                                 | Hospital General Universitario Gregorio Marañón                                                          | SeqCOVID-SPAIN consortium/IBV(CSIC)                                                                                                                                                             | Darío García de Viedma, Laura Pérez-Lago, Marta Herranz, Jon Sicilia, Julia Suárez, Pilar Catalán, Patricia Muñoz and SeqCOVID-SPAIN consortium                                                                                                                                                                                                                                                                                                                              |
| EPI_ISL_783543, EPI_ISL_783629, EPI_ISL_783689, EPI_ISL_783691, EPI_ISL_783710, EPI_ISL_783790, EPI_ISL_784073, EPI_ISL_784475, EPI_ISL_784679, EPI_ISL_784712, EPI_ISL_784891, EPI_ISL_784940, EPI_ISL_785035, EPI_ISL_785224, EPI_ISL_785231, EPI_ISL_785797, EPI_ISL_785823, EPI_ISL_785870, EPI_ISL_786097, EPI_ISL_786561, EPI_ISL_787083, EPI_ISL_787348, EPI_ISL_787446, EPI_ISL_788420, EPI_ISL_788454, EPI_ISL_788635, EPI_ISL_788776 | see above                                                                                                | Houston Methodist Hospital                                                                                                                                                                      | Houston Methodist Hospital                                                                                                                                                                                                                                                                                                                                                                                                                                                   |
| EPI_ISL_788904                                                                                                                                                                                                                                                                                                                                                                                                                                 | University of Wisconsin-Madison AIDS Vaccine Research Laboratories                                       | University of Wisconsin-Madison AIDS Vaccine Research Laboratories                                                                                                                              | S. Wesley Long, Randall J. Olsen, Paul A. Christensen, David W. Bernard, James J. Davis, Maulik Shukla, Marcus Nguyen, Matthew Ojeda Saavedra, Prasanti Yerramilli, Layne Pruitt, Sishir Subedi, Heather Hendrickson, and James M. Musser                                                                                                                                                                                                                                    |
| EPI_ISL_788946, EPI_ISL_788967                                                                                                                                                                                                                                                                                                                                                                                                                 | Ospedale "Di Venere"                                                                                     | Beaconlab (Bioinformatics, Evolution and Comparative Genomics lab), Dept of Biosciences, University on Milan                                                                                    | Gage Moreno, Katarina Braun, et al. AIDS Vaccine Research Laboratories                                                                                                                                                                                                                                                                                                                                                                                                       |
| EPI_ISL_790397, EPI_ISL_790449                                                                                                                                                                                                                                                                                                                                                                                                                 | Houston Methodist Hospital                                                                               | Houston Methodist Hospital                                                                                                                                                                      | Iacobellis M, d'Avenia M, Piliuscio R, Parisi A, Chiara M, Manzari C, Pesole G                                                                                                                                                                                                                                                                                                                                                                                               |
| EPI_ISL_790696                                                                                                                                                                                                                                                                                                                                                                                                                                 | Dutch COVID-19 response team                                                                             | National Institute for Public Health and the Environment (RIVM)                                                                                                                                 | S. Wesley Long, Randall J. Olsen, Paul A. Christensen, David W. Bernard, James J. Davis, Maulik Shukla, Marcus Nguyen, Matthew Ojeda Saavedra, Prasanti Yerramilli, Layne Pruitt, Sishir Subedi, Heather Hendrickson, and James M. Musser                                                                                                                                                                                                                                    |
| EPI_ISL_791799                                                                                                                                                                                                                                                                                                                                                                                                                                 | Massachusetts General Hospital                                                                           | Infectious Disease Program, Broad Institute of Harvard and MIT                                                                                                                                  | Adam Meijer, Harry Vennema, Jeroen Cremer, Sharon van den Brink, Bas van der Veer, AnneMarie van den Brandt, Florian Zwagemaker, Dennis Schmitz, Chantal Reusken, on behalf of the national COVID-19 response team                                                                                                                                                                                                                                                           |
| EPI_ISL_792087                                                                                                                                                                                                                                                                                                                                                                                                                                 | Toronto Invasive Bacterial Diseases Network                                                              | McMaster University                                                                                                                                                                             | Lemieux,J.E., Siddle,K.J., Shaw,B., Adams,G., Pierce,V., Turbett,S., Anahar,M., Branda,J., Slater,D., Harris,J., Lin,A.E., Gladden-Young,A., Lagerborg,K., Rudy,M., DeRuff,K., Carter,A., Normandin,E., Bauer,M., Reilly,S., Tomkins-Tinch,C., Loreth,C., Chaluvadi,S., Neumann,A., Cusick,C., Chapman,S.B., Gnirke,A., Flowers,K., Cerrato,F., Birren,B.W., Gallagher,G., Smole,S., Park,D.J., MacInnis,B.L., Ryan,E., LaRocque,R., Rosenberg,E. and Sabeti,P.C.            |
| EPI_ISL_792368                                                                                                                                                                                                                                                                                                                                                                                                                                 | Laboratorio de Virologia - HIEAyC San Juan de Dios                                                       | Área de Secuenciación del Laboratorio de Virología del Hospital de Niños Dr. Ricardo Gutierrez on behalf of 'Proyecto Argentino Interinstitucional de genómica de SARS-CoV-2' (PAIS Consortium) | Allison McGeer, Patryk Aftanas, Hooman Derakhshani, Angel Li, Kuganya Nirmalarajah, Emily Panousis, Ahmed Draia, Jalees Nasir, Michael Surette, Samira Mubareka, Andrew G. McArthur                                                                                                                                                                                                                                                                                          |
| EPI_ISL_792614, EPI_ISL_792617, EPI_ISL_792622, EPI_ISL_792638                                                                                                                                                                                                                                                                                                                                                                                 | LACEN-PB                                                                                                 | Laboratory of Respiratory Viruses and Measles, Oswaldo Cruz Institute, FIOCRUZ                                                                                                                  | Nabaes Jodar, MS; Goya, S; Natale, MI; Lusso, S; Ferioli, M; Colmeiro, M; Gatelli, A; Ercole, R; Valinotto, LE; Viegas, M.                                                                                                                                                                                                                                                                                                                                                   |
| EPI_ISL_792648                                                                                                                                                                                                                                                                                                                                                                                                                                 | LACEN-PR                                                                                                 | Laboratory of Respiratory Viruses and Measles, Oswaldo Cruz Institute, FIOCRUZ                                                                                                                  | Paola Resende, Luciana Appolinario, Fernando Motta, Anna Carolina Paixao, Ana Carolina Mendonca, João Felipe Bezerra, Romero Henrique Teixeira de Vasconcelos, Dalane Loudal Florentino Teixeira, Thiago Franco de Oliveira Carneiro, Marilda Siqueira                                                                                                                                                                                                                       |
| EPI_ISL_792954, EPI_ISL_793136, EPI_ISL_793140                                                                                                                                                                                                                                                                                                                                                                                                 | Department of Virus and Microbiological Special Diagnostics, Statens Serum Institut, Copenhagen, Denmark | Albertsen Lab, Department of Chemistry and Bioscience, Aalborg University, Denmark                                                                                                              | Paola Resende, Luciana Appolinario, Fernando Motta, Anna Carolina Paixao, Ana Carolina Mendonca, Maria do Carmo Debur, Irina Nastassja Riediger, Marilda Siqueira                                                                                                                                                                                                                                                                                                            |
| EPI_ISL_794015, EPI_ISL_794022, EPI_ISL_794023, EPI_ISL_794024, EPI_ISL_794025, EPI_ISL_794027, EPI_ISL_794060, EPI_ISL_794062, EPI_ISL_794063, EPI_ISL_794064, EPI_ISL_794065, EPI_ISL_794066, EPI_ISL_794067, EPI_ISL_794068, EPI_ISL_794069, EPI_ISL_794074, EPI_ISL_794075, EPI_ISL_794076, EPI_ISL_794077, EPI_ISL_794078, EPI_ISL_794079, EPI_ISL_794080, EPI_ISL_794081, EPI_ISL_794082                                                 | see above                                                                                                | Wadsworth Center, New York State Department.of Health                                                                                                                                           | Danish Covid-19 Genome Consortium                                                                                                                                                                                                                                                                                                                                                                                                                                            |
| EPI_ISL_794108                                                                                                                                                                                                                                                                                                                                                                                                                                 | GLENS FALLS HOSPITAL LABORATORY                                                                          | Wadsworth Center, New York State Department.of Health                                                                                                                                           | Kirsten St. George, Daryl M. Lamson, Alexis Russel, Matthew Shudt, Melissa A Leisner, Jonathan Plitnick, Navjot Singh, John Kelly, Sara Griesemer, Erasmus Schneider, Erica Lasek-Nesselquist                                                                                                                                                                                                                                                                                |
| EPI_ISL_794119, EPI_ISL_794132, EPI_ISL_794133, EPI_ISL_794136, EPI_ISL_794137, EPI_ISL_794140, EPI_ISL_794142, EPI_ISL_794143, EPI_ISL_794146, EPI_ISL_794150, EPI_ISL_794154, EPI_ISL_794158                                                                                                                                                                                                                                                 | see above                                                                                                | NORTHWELL HEALTH LABORATORIES                                                                                                                                                                   | Kirsten St. George, Daryl M. Lamson, Alexis Russel, Matthew Shudt, Melissa A Leisner, Jonathan Plitnick, Navjot Singh, John Kelly, Sara Griesemer, Erasmus Schneider, Erica Lasek-Nesselquist                                                                                                                                                                                                                                                                                |
| EPI_ISL_794165, EPI_ISL_794166                                                                                                                                                                                                                                                                                                                                                                                                                 | Wadsworth Center, New York State Department.of Health                                                    | Wadsworth Center, New York State Department.of Health                                                                                                                                           | Kirsten St. George, Daryl M. Lamson, Alexis Russel, Matthew Shudt, Melissa A Leisner, Jonathan Plitnick, Navjot Singh, John Kelly, Sara Griesemer, Erasmus Schneider, Erica Lasek-Nesselquist                                                                                                                                                                                                                                                                                |

|                                                                                                                                                                                                                                |                                                                                                                   |                                                                                                                               |                                                                                                                                                                                                                                                                                                                                                                                                                                                                                                                                                                                                                                                                                                                                                                                                    |
|--------------------------------------------------------------------------------------------------------------------------------------------------------------------------------------------------------------------------------|-------------------------------------------------------------------------------------------------------------------|-------------------------------------------------------------------------------------------------------------------------------|----------------------------------------------------------------------------------------------------------------------------------------------------------------------------------------------------------------------------------------------------------------------------------------------------------------------------------------------------------------------------------------------------------------------------------------------------------------------------------------------------------------------------------------------------------------------------------------------------------------------------------------------------------------------------------------------------------------------------------------------------------------------------------------------------|
| EPI_ISL_794204                                                                                                                                                                                                                 | URMC LABS                                                                                                         | Wadsworth Center, New York State Department.of Health                                                                         | Kirsten St. George, Daryl M. Lamson, Alexis Russel, Matthew Shudt, Melissa A Leisner, Jonathan Plitnick, Navjot Singh, John Kelly, Sara Griesemer, Erasmus Schneider, Erica Lasek-Nesselquist                                                                                                                                                                                                                                                                                                                                                                                                                                                                                                                                                                                                      |
| EPI_ISL_794209, EPI_ISL_794211, EPI_ISL_794215, EPI_ISL_794217, EPI_ISL_794223, EPI_ISL_794227, EPI_ISL_794234, EPI_ISL_794235, EPI_ISL_794238, EPI_ISL_794242, EPI_ISL_794250, EPI_ISL_794256, EPI_ISL_794276, EPI_ISL_794282 | see above                                                                                                         | Wadsworth Center, New York State Department.of Health                                                                         | Kirsten St. George, Daryl M. Lamson, Alexis Russel, Matthew Shudt, Melissa A Leisner, Jonathan Plitnick, Navjot Singh, John Kelly, Sara Griesemer, Erasmus Schneider, Erica Lasek-Nesselquist                                                                                                                                                                                                                                                                                                                                                                                                                                                                                                                                                                                                      |
| EPI_ISL_794287, EPI_ISL_794288, EPI_ISL_794292, EPI_ISL_794298, EPI_ISL_794299, EPI_ISL_794302, EPI_ISL_794307                                                                                                                 | Columbia University Irving Medical Center                                                                         | Wadsworth Center, New York State Department.of Health                                                                         | Kirsten St. George, Daryl M. Lamson, Alexis Russel, Matthew Shudt, Melissa A Leisner, Jonathan Plitnick, Navjot Singh, John Kelly, Sara Griesemer, Erasmus Schneider, Erica Lasek-Nesselquist                                                                                                                                                                                                                                                                                                                                                                                                                                                                                                                                                                                                      |
| EPI_ISL_794308, EPI_ISL_794318                                                                                                                                                                                                 | Wadsworth Center, New York State Department.of Health                                                             | Wadsworth Center, New York State Department.of Health                                                                         | Kirsten St. George, Daryl M. Lamson, Alexis Russel, Matthew Shudt, Melissa A Leisner, Jonathan Plitnick, Navjot Singh, John Kelly, Sara Griesemer, Erasmus Schneider, Erica Lasek-Nesselquist                                                                                                                                                                                                                                                                                                                                                                                                                                                                                                                                                                                                      |
| EPI_ISL_794659                                                                                                                                                                                                                 | HOSPITAL UNIVERSITARIO SAN IGNACIO                                                                                | Instituto Nacional de Salud - Dirección de Investigación en Salud Pública                                                     | Katherine Laiton-Donato, Diego A. Álvarez-Díaz, Carlos Franco-Muñoz, Mauricio Pacheco-Montealegre, Jonathan Reales, Sheryl Corchuelo, María T. Herrera, Julian Naizaque, Gerardo Santamaría, Paola Muñoz-Laiton, Diego Andrés Prada, Magdalena Wiesner, Martha Lucia Ospina Martínez, Marcela Mercado-Reyes                                                                                                                                                                                                                                                                                                                                                                                                                                                                                        |
| EPI_ISL_794666                                                                                                                                                                                                                 | SYNLAB REGIONAL NOROCCIDENTE                                                                                      | Instituto Nacional de Salud - Dirección de Investigación en Salud Pública                                                     | Katherine Laiton-Donato, Diego A. Álvarez-Díaz, Carlos Franco-Muñoz, Mauricio Pacheco-Montealegre, Jonathan Reales, Sheryl Corchuelo, María T. Herrera, Julian Naizaque, Gerardo Santamaría, Paola Muñoz-Laiton, Diego Andrés Prada, Magdalena Wiesner, Martha Lucia Ospina Martínez, Marcela Mercado-Reyes                                                                                                                                                                                                                                                                                                                                                                                                                                                                                        |
| EPI_ISL_802392                                                                                                                                                                                                                 | MSHS Clinical Microbiology Laboratories                                                                           | MSHS Pathogen Surveillance Program                                                                                            | Ana S. Gonzalez-Reiche, Hala Alshammary, Mitchell J. Sullivan, Brianne Ciferri, Ajay Obla, Angela Amoako, Mahmoud Awawda, Elena Hirsch, Ashley S. Salimbangon, Levy Sominsky, Katherine Beach, Kayla Russo, Charles Gleason, Shelcie Fabre, Giulio Kleiner, Zenab Khan, Bremy Alburquerque, Adriana van de Guchte, Komal Srivastava, Matthew M. Hernandez, Jayeeta Dutta, Denise Jurczynszak, Emily Ferreri, Rachel Chernet, Nancy Francoeur, Betsaida Salom Melo, Irina Oussenko, Gintaras Deikus, Juan Soto, Shwetha Hara Sridhar, Ying-Chih Wang, Kathryn Twyman, Andrew Kasarskis, Deena R. Altman, Robert Sebra, Adolfo Garcia-Sastre, Marta Luksza, Gopi Patel, Sarah Schaefer, Melissa Gitman, Michael D. Nowak, Alberto Paniz-Mondolfi, Emilia Mia Sordillo, Viviana Simon, Harm van Bakel |
| EPI_ISL_802443, EPI_ISL_802448                                                                                                                                                                                                 | WESTCHESTER MEDICAL CENTER                                                                                        | Wadsworth Center, New York State Department.of Health                                                                         | Kirsten St. George, Daryl M. Lamson, Alexis Russel, Matthew Shudt, Melissa A Leisner, Jonathan Plitnick, Navjot Singh, John Kelly, Sara Griesemer, Erasmus Schneider, Erica Lasek-Nesselquist                                                                                                                                                                                                                                                                                                                                                                                                                                                                                                                                                                                                      |
| EPI_ISL_802467                                                                                                                                                                                                                 | SARATOGA HOSPITAL LABORATORY                                                                                      | Wadsworth Center, New York State Department.of Health                                                                         | Kirsten St. George, Daryl M. Lamson, Alexis Russel, Matthew Shudt, Melissa A Leisner, Jonathan Plitnick, Navjot Singh, John Kelly, Sara Griesemer, Erasmus Schneider, Erica Lasek-Nesselquist                                                                                                                                                                                                                                                                                                                                                                                                                                                                                                                                                                                                      |
| EPI_ISL_802470, EPI_ISL_802473, EPI_ISL_802474, EPI_ISL_802479, EPI_ISL_802485, EPI_ISL_802489, EPI_ISL_802490                                                                                                                 | WESTCHESTER MEDICAL CENTER                                                                                        | Wadsworth Center, New York State Department.of Health                                                                         | Kirsten St. George, Daryl M. Lamson, Alexis Russel, Matthew Shudt, Melissa A Leisner, Jonathan Plitnick, Navjot Singh, John Kelly, Sara Griesemer, Erasmus Schneider, Erica Lasek-Nesselquist                                                                                                                                                                                                                                                                                                                                                                                                                                                                                                                                                                                                      |
| EPI_ISL_802503, EPI_ISL_802505                                                                                                                                                                                                 | Connecticut Department of Health                                                                                  | Grubaugh Lab - Yale School of Public Health                                                                                   | Tara Alpert, Joseph Fauver, Anderson Brito, Mallery Breban, Anne Wylie, Chantal Vogels, Mary Petrone, Chaney Kalinich, Isabel Ott, Nathan Grubaugh                                                                                                                                                                                                                                                                                                                                                                                                                                                                                                                                                                                                                                                 |
| EPI_ISL_802567, EPI_ISL_802568, EPI_ISL_802569                                                                                                                                                                                 | Essentia Health-St. Mary's Medical Center                                                                         | Minnesota Department of Health, Public Health Laboratory                                                                      | Alexandra Lorentz, Jacob Garfin, Matt Plumb, and Xiong Wang                                                                                                                                                                                                                                                                                                                                                                                                                                                                                                                                                                                                                                                                                                                                        |
| EPI_ISL_802777, EPI_ISL_802780, EPI_ISL_802788                                                                                                                                                                                 | Columbia University Irving Medical Center                                                                         | Wadsworth Center, New York State Department.of Health                                                                         | Kirsten St. George, Daryl M. Lamson, Alexis Russel, Matthew Shudt, Melissa A Leisner, Jonathan Plitnick, Navjot Singh, John Kelly, Sara Griesemer, Erasmus Schneider, Erica Lasek-Nesselquist                                                                                                                                                                                                                                                                                                                                                                                                                                                                                                                                                                                                      |
| EPI_ISL_803098                                                                                                                                                                                                                 | Institute of Microbiology, Universidad San Francisco de Quito                                                     | Institute of Microbiology, Universidad San Francisco de Quito                                                                 | Sully Márquez, Belén Prado-Vivar, Juan José Guadalupe, Monica Becerra-Wong, Bernardo Gutiérrez, Eulalia Pazmiño, Katalina Pacheco, Verónica Barragán, Patricio Rojas-Silva, Gabriel Trueba, Michelle Grunauer, Paul Cárdenas                                                                                                                                                                                                                                                                                                                                                                                                                                                                                                                                                                       |
| EPI_ISL_803665, EPI_ISL_803711                                                                                                                                                                                                 | Wisconsin State Laboratory of Hygiene Communicable Disease Division                                               | Wisconsin State Laboratory of Hygiene Communicable Disease Division                                                           | Kelsey R. Florek, Abigail C. Shockey                                                                                                                                                                                                                                                                                                                                                                                                                                                                                                                                                                                                                                                                                                                                                               |
| EPI_ISL_804386                                                                                                                                                                                                                 | Dutch COVID-19 response team                                                                                      | National Institute for Public Health and the Environment (RIVM)                                                               | Adam Meijer, Harry Vennema, Dirk Eggink, Matthijs Welkers, Jeroen Cremer, Sharon van den Brink, Bas van der Veer, AnneMarie van den Brandt, Florian Zwagemaker, Dennis Schmitz, Chantal Reusken, on behalf of the national COVID-19 response team                                                                                                                                                                                                                                                                                                                                                                                                                                                                                                                                                  |
| EPI_ISL_804945                                                                                                                                                                                                                 | Wadsworth Center, New York State Department.of Health                                                             | Wadsworth Center, New York State Department.of Health                                                                         | Kirsten St. George, Daryl M. Lamson, Alexis Russel, Matthew Shudt, Melissa A Leisner, Jonathan Plitnick, Navjot Singh, John Kelly, Sara Griesemer, Erasmus Schneider, Erica Lasek-Nesselquist                                                                                                                                                                                                                                                                                                                                                                                                                                                                                                                                                                                                      |
| EPI_ISL_804946                                                                                                                                                                                                                 | BIO-REFERENCE LABORATORIES                                                                                        | Wadsworth Center, New York State Department.of Health                                                                         | Kirsten St. George, Daryl M. Lamson, Alexis Russel, Matthew Shudt, Melissa A Leisner, Jonathan Plitnick, Navjot Singh, John Kelly, Sara Griesemer, Erasmus Schneider, Erica Lasek-Nesselquist                                                                                                                                                                                                                                                                                                                                                                                                                                                                                                                                                                                                      |
| EPI_ISL_804981, EPI_ISL_804982                                                                                                                                                                                                 | BIO-REFERENCE LABORATORIES                                                                                        | Wadsworth Center, New York State Department.of Health                                                                         | Kirsten St. George, Daryl M. Lamson, Alexis Russel, Matthew Shudt, Melissa A Leisner, Jonathan Plitnick, Navjot Singh, John Kelly, Sara Griesemer, Erasmus Schneider, Erica Lasek-Nesselquist                                                                                                                                                                                                                                                                                                                                                                                                                                                                                                                                                                                                      |
| EPI_ISL_806082                                                                                                                                                                                                                 | Alberta Precision Labs (APL)                                                                                      | Alberta Precision Labs (APL)                                                                                                  | Gordon P, Lam LG, Pabbaraju K, Wong A, Ma R, Li V, Melin A, Tipples G, Berenger B, Zelyas N, Kellner J, Bernier F, Chui L, Croxen M                                                                                                                                                                                                                                                                                                                                                                                                                                                                                                                                                                                                                                                                |
| EPI_ISL_806530                                                                                                                                                                                                                 | Charité Universitätsmedizin Berlin, Institut für Virologie/Labor Berlin                                           | Charité Universitätsmedizin Berlin, Institut für Virologie                                                                    | Victor M Corman, Jörn Beheim-Schwarzbach, Barbara Mühlemann, Julia Schneider, Talitha Veith, Cornelia Schlee, Tomasz Zemojtel, Terry Jones, Christian Drosten                                                                                                                                                                                                                                                                                                                                                                                                                                                                                                                                                                                                                                      |
| EPI_ISL_806544                                                                                                                                                                                                                 | INSPI Instituto Nacional de Investigación en Salud Pública                                                        | Av. Julián Coronel 905 entre Esmeraldas y José Mascote Av. Juan Tanca Marengo No. 100 y Av. de las Américas                   | Leandro Patiño, Doménica de Mora, Maritza Olmedo, Andrés Carrasco, Orson Mestanza, Mary Regato, Melissa Zambrano, Manuel González, Alfredo Bruno, Alberto Orlando.                                                                                                                                                                                                                                                                                                                                                                                                                                                                                                                                                                                                                                 |
| EPI_ISL_806718                                                                                                                                                                                                                 | Sydney South West Pathology Service (SSWPS) - Royal Prince Alfred Hospital - NSW Health Pathology                 | NSW Health Pathology - Institute of Clinical Pathology and Medical Research; Westmead Hospital; University of Sydney          | CIDM-PH et al.                                                                                                                                                                                                                                                                                                                                                                                                                                                                                                                                                                                                                                                                                                                                                                                     |
| EPI_ISL_811163                                                                                                                                                                                                                 | Dharwad                                                                                                           | CSIR Institute of Genomics and Integrative Biology                                                                            | Dr. Shivarudrapp B Bhairappanavar, Rahul Bhojar, Mohammed Imran, Mohit Divakar, Disha Sharma, Dr. Vijay A Yenagi, Dr. Suresh B Arakera, Dr. Amit Ugargol, Dr. Rgavendra B Nayak, Bani Jolly, Abhinav Jain, Paras Sehgal, Gyan Ranjan, Vinod Scaria, Sridhar Sivasubbu                                                                                                                                                                                                                                                                                                                                                                                                                                                                                                                              |
| EPI_ISL_812208, EPI_ISL_812213, EPI_ISL_812222                                                                                                                                                                                 | TN Division of Laboratory Services                                                                                | Pathogen Discovery, Respiratory Viruses Branch, Division of Viral Diseases, Centers for Disease Control and Prevention        | Yan Li, Ying Tao, Anna Montmayeur, Jing Zhang, Brian Lynch, Krista Queen, Anna Uehara, Rachel Marine, Peter Cook, Clinton R. Paden, Haibin Wang, Suxiang Tong                                                                                                                                                                                                                                                                                                                                                                                                                                                                                                                                                                                                                                      |
| EPI_ISL_812334                                                                                                                                                                                                                 | United States Air Force School of Aerospace Medicine                                                              | United States Air Force School of Aerospace Medicine                                                                          | Anthony Fries, Jennifer Meyer, Amanda Javorina, Sarah Purves, William Gruner, Clarise Starr, Elizabeth Macias                                                                                                                                                                                                                                                                                                                                                                                                                                                                                                                                                                                                                                                                                      |
| EPI_ISL_812463                                                                                                                                                                                                                 | Laboratorio de Referencia Nacional de Virus Respiratorios, Instituto Nacional de Salud Peru                       | Laboratorio de Genómica Microbiana, Universidad Peruana Cayetano Heredia                                                      | Pablo Tsukayama, Alejandra Dávila-Barclay, Guillermo Salvatierra, Luis González, Pedro E. Romero, Brenda Ayzanoa, Janet Huancachoque, Pool Marcos, Camila Castillo-Vilcahuamán, Oscar Escalante, Priscila Lope, Nancy Rojas                                                                                                                                                                                                                                                                                                                                                                                                                                                                                                                                                                        |
| EPI_ISL_815368                                                                                                                                                                                                                 | Centogene                                                                                                         | Centogene                                                                                                                     | Peter Bauer, Krishna Kumar Kandaswamy, Vivi Hue-Trang Lieu                                                                                                                                                                                                                                                                                                                                                                                                                                                                                                                                                                                                                                                                                                                                         |
| EPI_ISL_819270                                                                                                                                                                                                                 | Wyoming Public Health Laboratory                                                                                  | Wyoming Public Health Laboratory                                                                                              | Noah Hull, Taylor Fearing, Lynette Gumbleton, Channing Weber, Ashley Norberg, Bailey Bowcutt, and Wanda Manley                                                                                                                                                                                                                                                                                                                                                                                                                                                                                                                                                                                                                                                                                     |
| EPI_ISL_819698                                                                                                                                                                                                                 | Oxford Viromics, NDM, University of Oxford; Oxford University Hospitals; Basingstoke and North Hampshire Hospital | COVID-19 Genomics UK (COG-UK) Consortium                                                                                      | Tanya Golubchik, David Bonsall, George Macintyre, Amy Trebes, Mariateresa de Cesare, Catrin Moore, Alex Mobbs, Anita Justice, Robert Shaw, Monique Andersson, Timothy Peto, Emma Wise, Nathan Moore, Jessica Lynch, Nick Cortes, Matilde Mori, Stephen Kidd, David Buck, John Todd, Christophe Fraser                                                                                                                                                                                                                                                                                                                                                                                                                                                                                              |
| EPI_ISL_824293, EPI_ISL_824294                                                                                                                                                                                                 | Institute of Microbiology, Universidad San Francisco de Quito                                                     | Institute of Microbiology, Universidad San Francisco de Quito                                                                 | Belén Prado-Vivar, Sully Márquez, Juan José Guadalupe, Monica Becerra-Wong, Bernardo Gutiérrez, Eulalia Pazmiño, Katalina Pacheco, Verónica Barragán, Patricio Rojas-Silva, Gabriel Trueba, Michelle Grunauer, Paul Cárdenas                                                                                                                                                                                                                                                                                                                                                                                                                                                                                                                                                                       |
| EPI_ISL_824679                                                                                                                                                                                                                 | Cedars-Sinai Medical Center, Department of Pathology & Laboratory Medicine, Molecular Pathology Laboratory        | Cedars-Sinai Medical Center, Molecular Pathology Laboratory of Department of Pathology & Laboratory Medicine and Genomic Core | Wenjuan Zhang, Brian Davis, Stephanie Chen, Jorge Mario Sincuir Martinez, Jasmine T Plummer, Eric Vail                                                                                                                                                                                                                                                                                                                                                                                                                                                                                                                                                                                                                                                                                             |

|                                                                                                                |                                                                                                                    |                                                                                                                                                                                                     |                                                                                                                                                                                                                                                                                                                                                                                                                                                                                                                                                                                                         |
|----------------------------------------------------------------------------------------------------------------|--------------------------------------------------------------------------------------------------------------------|-----------------------------------------------------------------------------------------------------------------------------------------------------------------------------------------------------|---------------------------------------------------------------------------------------------------------------------------------------------------------------------------------------------------------------------------------------------------------------------------------------------------------------------------------------------------------------------------------------------------------------------------------------------------------------------------------------------------------------------------------------------------------------------------------------------------------|
| EPI_ISL_825037                                                                                                 | B.J. Medical College and Civil hospital, Ahmedabad                                                                 | Gujarat Biotechnology Research Centre                                                                                                                                                               | Pranay Shah, Janvi Raval, Zarna Patel, Nitin Savaliya, Dinesh Kumar, Zuber Saiyed, Labdhi Pandya, Afzal Ansari, Nikha Trivedi, Apurvashin Puvar, Ramesh Pandit, Kamlesh J Upadhyay, Nilima Shah, Sanjay Kapadia, Dipa Kinariwala, Chaitanya Joshi, Madhvi Joshi                                                                                                                                                                                                                                                                                                                                         |
| EPI_ISL_825041                                                                                                 | B.J. Medical College and Civil hospital, Ahmedabad                                                                 | Gujarat Biotechnology Research Centre                                                                                                                                                               | Nikha Trivedi, Apurvashin Puvar, Ramesh Pandit, Janvi Raval, Zarna Patel, Nitin Savaliya, Dinesh Kumar, Zuber Saiyed, Labdhi Pandya, Afzal Ansari, Pranay Shah, Kamlesh J Upadhyay, Sanjay Kapadia, Dipa Kinariwala, Chaitanya Joshi, Madhvi Joshi                                                                                                                                                                                                                                                                                                                                                      |
| EPI_ISL_825711                                                                                                 | Laboratoire de santé publique du Québec                                                                            | Laboratoire de santé publique du Québec                                                                                                                                                             | Sandrine Moreira, Ioannis Ragoussis, Guillaume Bourque, Jesse Shapiro, Mark Lathrop and Michel Roger on behalf of the CoVSeQ research group ( <a href="http://covseq.ca/researchgroup">http://covseq.ca/researchgroup</a> )                                                                                                                                                                                                                                                                                                                                                                             |
| EPI_ISL_830208, EPI_ISL_830210, EPI_ISL_830230                                                                 | KALEIDA CENTER FOR LABORATORY MEDICINE                                                                             | Wadsworth Center, New York State Department of Health                                                                                                                                               | Kirsten St. George, Daryl M. Lamson, Alexis Russel, Matthew Shudt, Melissa A Leisner, Jonathan Plitnick, Navjot Singh, John Kelly, Erasmus Schneider, Erica Lasek-Nesselquist                                                                                                                                                                                                                                                                                                                                                                                                                           |
| EPI_ISL_830248, EPI_ISL_830253, EPI_ISL_830257, EPI_ISL_830259, EPI_ISL_830334, EPI_ISL_830340, EPI_ISL_830348 | Wadsworth Center, New York State Department of Health                                                              | Wadsworth Center, New York State Department of Health                                                                                                                                               | Kirsten St. George, Daryl M. Lamson, Alexis Russel, Matthew Shudt, Melissa A Leisner, Jonathan Plitnick, Navjot Singh, John Kelly, Erasmus Schneider, Erica Lasek-Nesselquist                                                                                                                                                                                                                                                                                                                                                                                                                           |
| EPI_ISL_830572, EPI_ISL_830574, EPI_ISL_830576                                                                 | NORTHWELL HEALTH LABORATORIES                                                                                      | Wadsworth Center, New York State Department of Health                                                                                                                                               | Kirsten St. George, Daryl M. Lamson, Alexis Russel, Matthew Shudt, Melissa A Leisner, Jonathan Plitnick, Navjot Singh, John Kelly, Erasmus Schneider, Erica Lasek-Nesselquist                                                                                                                                                                                                                                                                                                                                                                                                                           |
| EPI_ISL_830590, EPI_ISL_830595, EPI_ISL_830599, EPI_ISL_830605, EPI_ISL_830614, EPI_ISL_830616, EPI_ISL_830623 | KALEIDA CENTER FOR LABORATORY MEDICINE                                                                             | Wadsworth Center, New York State Department of Health                                                                                                                                               | Kirsten St. George, Daryl M. Lamson, Alexis Russel, Matthew Shudt, Melissa A Leisner, Jonathan Plitnick, Navjot Singh, John Kelly, Erasmus Schneider, Erica Lasek-Nesselquist                                                                                                                                                                                                                                                                                                                                                                                                                           |
| EPI_ISL_830633, EPI_ISL_830639                                                                                 | NORTHWELL HEALTH LABORATORIES                                                                                      | Wadsworth Center, New York State Department of Health                                                                                                                                               | Kirsten St. George, Daryl M. Lamson, Alexis Russel, Matthew Shudt, Melissa A Leisner, Jonathan Plitnick, Navjot Singh, John Kelly, Erasmus Schneider, Erica Lasek-Nesselquist                                                                                                                                                                                                                                                                                                                                                                                                                           |
| EPI_ISL_830655, EPI_ISL_830656, EPI_ISL_830676, EPI_ISL_830679, EPI_ISL_830680                                 | SUNY UPSTATE MEDICAL UNIVERSITY                                                                                    | Wadsworth Center, New York State Department of Health                                                                                                                                               | Kirsten St. George, Daryl M. Lamson, Alexis Russel, Matthew Shudt, Melissa A Leisner, Jonathan Plitnick, Navjot Singh, John Kelly, Erasmus Schneider, Erica Lasek-Nesselquist                                                                                                                                                                                                                                                                                                                                                                                                                           |
| EPI_ISL_830692, EPI_ISL_830716                                                                                 | ALBANY MEDICAL CENTER HOSPITAL CLINICAL LABORATORIES                                                               | Wadsworth Center, New York State Department of Health                                                                                                                                               | Kirsten St. George, Daryl M. Lamson, Alexis Russel, Matthew Shudt, Melissa A Leisner, Jonathan Plitnick, Navjot Singh, John Kelly, Erasmus Schneider, Erica Lasek-Nesselquist                                                                                                                                                                                                                                                                                                                                                                                                                           |
| EPI_ISL_830722                                                                                                 | BIO-REFERENCE LABORATORIES                                                                                         | Wadsworth Center, New York State Department of Health                                                                                                                                               | Kirsten St. George, Daryl M. Lamson, Alexis Russel, Matthew Shudt, Melissa A Leisner, Jonathan Plitnick, Navjot Singh, John Kelly, Erasmus Schneider, Erica Lasek-Nesselquist                                                                                                                                                                                                                                                                                                                                                                                                                           |
| EPI_ISL_831519, EPI_ISL_831547                                                                                 | University of Wisconsin-Madison AIDS Vaccine Research Laboratories                                                 | University of Wisconsin-Madison AIDS Vaccine Research Laboratories                                                                                                                                  | Gage Moreno, Katarina Braun, et al. AIDS Vaccine Research Laboratories                                                                                                                                                                                                                                                                                                                                                                                                                                                                                                                                  |
| EPI_ISL_831678, EPI_ISL_831689                                                                                 | Laboratório de Microbiologia Molecular - Universidade FEEVALE                                                      | Universidade Federal de Ciências da Saúde de Porto Alegre                                                                                                                                           | Vinicius Bonetti Franceschi, Amanda de Menezes Mayer, Gabriel Dickin Caldana, Carla Andretta Moreira Neves, Patricia Aline Gröhs Ferrareze, Gabriela Bettella Cybis, Ricardo Ariel Zimmerman, Livia Kmetzsch, Fernando Rosado Spilki, Claudia Elizabeth Thompson                                                                                                                                                                                                                                                                                                                                        |
| EPI_ISL_831732, EPI_ISL_831760, EPI_ISL_831769                                                                 | United States Air Force School of Aerospace Medicine                                                               | United States Air Force School of Aerospace Medicine                                                                                                                                                | Anthony Fries, Jennifer Meyer, William Gruner, Amanda Javorina, Sarah Purves, Clarise Starr, Elizabeth Macias                                                                                                                                                                                                                                                                                                                                                                                                                                                                                           |
| EPI_ISL_831894                                                                                                 | Santa Clara County Public Health Laboratory                                                                        | Santa Clara County Public Health Laboratory                                                                                                                                                         | Santa Clara County Public Health Department                                                                                                                                                                                                                                                                                                                                                                                                                                                                                                                                                             |
| EPI_ISL_831973                                                                                                 | Klinisk mikrobiologi                                                                                               | The Public Health Agency of Sweden                                                                                                                                                                  | Department of Microbiology, The Public Health Agency of Sweden                                                                                                                                                                                                                                                                                                                                                                                                                                                                                                                                          |
| EPI_ISL_832993, EPI_ISL_832994, EPI_ISL_833027                                                                 | Maine HETL                                                                                                         | Tewhey Lab, The Jackson Laboratory                                                                                                                                                                  | Matluk,N., Dewey,H., Iosue,F., Barter,M., Lynch,R., Munger,H. and Tewhey,R.                                                                                                                                                                                                                                                                                                                                                                                                                                                                                                                             |
| EPI_ISL_833412                                                                                                 | Beverly Hospital                                                                                                   | Los Angeles County PHL                                                                                                                                                                              | P. Hemarajata et al.                                                                                                                                                                                                                                                                                                                                                                                                                                                                                                                                                                                    |
| EPI_ISL_837560                                                                                                 | Centro Nacional de Enfermedades Tropicales (CENETROP)                                                              | Laboratory of Respiratory Viruses and Measles, Oswaldo Cruz Institute, FIOCRUZ                                                                                                                      | Paola Resende, Roxana Loayza, Cinthia Avila, Luciana Apolinario, Fernando Motta, Anna Carolina Paixao, Ana Carolina Mendonca, Marilda Siqueira                                                                                                                                                                                                                                                                                                                                                                                                                                                          |
| EPI_ISL_837677, EPI_ISL_837716                                                                                 | Instituto Nacional de Enfermedades Respiratorias (INER)                                                            | Instituto Nacional de Enfermedades Respiratorias (INER)                                                                                                                                             | Celia Boukadida, Margarita Matías-Florentino, Alma Rincón-Rubio, Hector Esteban Paz-Juárez, Olivia Briceño, Edgar Sevilla-Reyes, Fidencio Mejía-Nepomuceno, Mario Mújica-Sánchez, Eduardo Becerril-Vargas, José Arturo Martínez-Orozco, Alejandra Hernández-Terán, Jorge Salas-Hernández, Santiago Ávila-Ríos, Joel Armando Vázquez-Pérez                                                                                                                                                                                                                                                               |
| EPI_ISL_840320                                                                                                 | Oxford Viroomics, NDM, University of Oxford; Oxford University Hospitals; Basingstoke and North Hampshire Hospital | COVID-19 Genomics UK (COG-UK) Consortium                                                                                                                                                            | Tanya Golubchik, David Bonsall, George Macintyre, Amy Trebes, Mariateresa de Cesare, Catrin Moore, Alex Morris, Anita Justice, Robert Shaw, Monique Andersson, Timothy Peto, Emma Wise, Nathan Moore, Jessica Lynch, Nick Cortes, Matilde Mori, Stephen Kidd, David Buck, John Todd, Christophe Fraser                                                                                                                                                                                                                                                                                                  |
| EPI_ISL_842652                                                                                                 | Laboratorio de Biología Molecular Hospital Pedro de Elizalde                                                       | Grupo de Genómica y Bioinformática del Instituto de Investigación de la Cadena Láctea CONICET-INTA on behalf of 'Proyecto Argentino Interinstitucional de genómica de SARS-CoV-2' (PAIS Consortium) | Amadio, AF, Eberhardt, MF; Irazoqui, M; Indart, J; Rocovich, J; Montoto Piazza, L; Wenk, G; Martín, ME; Sanchez, MF; Marchetti, P; Morandi, F; Sueiro, ML; Claps, A; Bressan, L; Torres, FJ; Chamorro, J; Gondolesi, J; Gómez, ML; Diaz, B; Rosales, D; Alegre, F; Zamora, N; Osaba, E; Paez, E; Lorenzo, F; Torres, C; Aulicino, P; König, G; Alexay, S; Natale, M; Valinotto, L; Lusso, S; Goya, S; Nabaes Jodar, MS; Viegas, M.                                                                                                                                                                      |
| EPI_ISL_842670                                                                                                 | University College London Hospital                                                                                 | COVID-19 Genomics UK (COG-UK) Consortium                                                                                                                                                            | Judith Heaney, Matthew Byott, Catherine Houlihan, Dan Frampton, Stuart Kirk, Moira Spyer and Eleni Nastouli                                                                                                                                                                                                                                                                                                                                                                                                                                                                                             |
| EPI_ISL_843194, EPI_ISL_843198, EPI_ISL_843200                                                                 | Canterbury Health Laboratories                                                                                     | Institute of Environmental Science and Research (ESR)                                                                                                                                               | Xiaoyun Ren, Matt Storey, Nikki Freed, Muhammad Faisal, Jing Wang, Hermes Perez, Anja Werno, Antje van der Linden, Arlo Upton, Chris Mansell, David Hammer, Dragana Drinkovic, Gary McAuliffe, Hana Sofia Andersson, James Ussher, Jill Sherwood, Josh Freeman, Julia Howard, Juliet Ely, Mary DeAlmeida, Matt Blakiston, Matthew Rogers, Max Bloomfield, Michael Addidle, Michelle Balm, Sally Roberts, Sarah Jefferies, Sharmini Muttaiyah, Susan Morpeth, Susan Taylor, Timothy Blackmore, Vani Sathyendran, Veronica Playle, Virginia Hope, Erasmus Smit, Lauren Jelly, Olin Silander, Joep de Ligt |
| EPI_ISL_845640                                                                                                 | Laboratorio de Salud Pública - Secretaría Distrital de Salud                                                       | Instituto Nacional de Salud - Dirección de Investigación en Salud Pública                                                                                                                           | Katherine Laiton-Donato, Diego A. Álvarez-Díaz, Carlos Franco-Muñoz, Mauricio Pacheco-Montealegre, María T. Herrera-Sepúlveda, Jonathan Reales, Sheryll Corchuelo, Julian Naizaque, Gerardo Santamaría, Paola Muñoz-Laiton, Diego Andrés Prada, Magdalena Wiesner, Martha Lucia Ospina Martínez, Marcela Mercado-Reyes                                                                                                                                                                                                                                                                                  |
| EPI_ISL_847534, EPI_ISL_847577                                                                                 | California Department of Public Health                                                                             | Chiu Laboratory, University of California, San Francisco                                                                                                                                            | Charles Chiu, Xianding (Wayne) Deng, Candace Wang, Brian Bushnell, Scot Federman, Jill Hacker, Debra Wadford                                                                                                                                                                                                                                                                                                                                                                                                                                                                                            |
| EPI_ISL_848577                                                                                                 | Evandro Chagas Institute                                                                                           | Evandro Chagas Institute                                                                                                                                                                            | Santos, M.C.; Silva, A.M.; Junior, W.D.C.; Barbagelata, L.S.; Ferreira, J.A.; Sousa, E.M.A.; da Silva, P.S.; Pinheiro, K.C.; L.C.; Sousa Junior, E.C.                                                                                                                                                                                                                                                                                                                                                                                                                                                   |
| EPI_ISL_848667, EPI_ISL_848682, EPI_ISL_848856, EPI_ISL_848864                                                 | Florida Bureau of Public Health Laboratories                                                                       | Florida Bureau of Public Health Laboratories                                                                                                                                                        | Sarah Schmedes, Jason Blanton                                                                                                                                                                                                                                                                                                                                                                                                                                                                                                                                                                           |
| EPI_ISL_849597                                                                                                 | Seattle Flu Study                                                                                                  | Seattle Flu Study                                                                                                                                                                                   | Deborah A. Nickerson, Chris D. Frazar, Jover Lee, Benjamin Pelle, Matthew Richardson, Amanda Adler, Elisabeth Brandstetter, Peter D. Han, Kairsten Fay, Misja Ilicsin, Kirsten Lacombe, Thomas R. Sibley, Melissa Truong, Caitlin R. Wolf, Michael Boeckh, Janet A. Englund, Michael Famulare, Barry R. Lutz, Mark J. Rieder, Lea M. Starita, Matthew Thompson, Jay Shendure, Trevor Bedford, Helen Y. Chu                                                                                                                                                                                              |
| EPI_ISL_849955                                                                                                 | Santa Clara County Public Health Laboratory                                                                        | Chan-Zuckerberg Biohub                                                                                                                                                                              | CZB Ciliahub Consortium                                                                                                                                                                                                                                                                                                                                                                                                                                                                                                                                                                                 |
| EPI_ISL_850135, EPI_ISL_850148                                                                                 | Renegade                                                                                                           | Chan-Zuckerberg Biohub                                                                                                                                                                              | CZB Ciliahub Consortium                                                                                                                                                                                                                                                                                                                                                                                                                                                                                                                                                                                 |
| EPI_ISL_853223, EPI_ISL_853236                                                                                 | Toronto Invasive Bacterial Diseases Network                                                                        | Ontario Institute for Cancer Research                                                                                                                                                               | Allison McGeer, Patryk Aftanas, Angel Li, Kuganya Nirmalarajah, Samira Mubareka, Ilinca Lungu, Lubina Kothari, Bernard Lam, Paul Krzyzanowski, Michael Laszloffy, Lawrence E. Heisler, Richard de Borja, Jared T. Simpson                                                                                                                                                                                                                                                                                                                                                                               |
| EPI_ISL_853448, EPI_ISL_853449, EPI_ISL_853456                                                                 | Santa Clara County Public Health Laboratory                                                                        | Chan-Zuckerberg Biohub                                                                                                                                                                              | CZB Ciliahub Consortium                                                                                                                                                                                                                                                                                                                                                                                                                                                                                                                                                                                 |
| EPI_ISL_853654, EPI_ISL_853658,                                                                                | NORTHWELL HEALTH LABORATORIES                                                                                      | Wadsworth Center, New York State Department of Health                                                                                                                                               | Kirsten St. George, Daryl M. Lamson, Alexis Russel, Matthew Shudt, Melissa A Leisner, Jonathan Plitnick, Navjot Singh, John Kelly, Erasmus Schneider,                                                                                                                                                                                                                                                                                                                                                                                                                                                   |



|                                                                                                                                                                                                                                                                                                                                                                                                                                                |                                                                                                          |                                                                                  |                                                                                                                                                                                                                                                                                                   |
|------------------------------------------------------------------------------------------------------------------------------------------------------------------------------------------------------------------------------------------------------------------------------------------------------------------------------------------------------------------------------------------------------------------------------------------------|----------------------------------------------------------------------------------------------------------|----------------------------------------------------------------------------------|---------------------------------------------------------------------------------------------------------------------------------------------------------------------------------------------------------------------------------------------------------------------------------------------------|
| EPI_ISL_853660, EPI_ISL_853661, EPI_ISL_853664, EPI_ISL_853670                                                                                                                                                                                                                                                                                                                                                                                 |                                                                                                          |                                                                                  | Erica Lasek-Nesselquist                                                                                                                                                                                                                                                                           |
| EPI_ISL_853684                                                                                                                                                                                                                                                                                                                                                                                                                                 | ALBANY MEDICAL CENTER HOSPITAL CLINICAL LABORATORIES                                                     | Wadsworth Center, New York State Department of Health                            | Kirsten St. George, Daryl M. Lamson, Alexis Russel, Matthew Shudt, Melissa A Leisner, Jonathan Plitnick, Navjot Singh, John Kelly, Erasmus Schneider, Erica Lasek-Nesselquist                                                                                                                     |
| EPI_ISL_853706                                                                                                                                                                                                                                                                                                                                                                                                                                 | SUNY UPSTATE MEDICAL UNIVERSITY                                                                          | Wadsworth Center, New York State Department of Health                            | Kirsten St. George, Daryl M. Lamson, Alexis Russel, Matthew Shudt, Melissa A Leisner, Jonathan Plitnick, Navjot Singh, John Kelly, Erasmus Schneider, Erica Lasek-Nesselquist                                                                                                                     |
| EPI_ISL_853713                                                                                                                                                                                                                                                                                                                                                                                                                                 | NORTHWELL HEALTH LABORATORIES                                                                            | Wadsworth Center, New York State Department of Health                            | Kirsten St. George, Daryl M. Lamson, Alexis Russel, Matthew Shudt, Melissa A Leisner, Jonathan Plitnick, Navjot Singh, John Kelly, Erasmus Schneider, Erica Lasek-Nesselquist                                                                                                                     |
| EPI_ISL_854348                                                                                                                                                                                                                                                                                                                                                                                                                                 | URMC LABS                                                                                                | Wadsworth Center, New York State Department of Health                            | Kirsten St. George, Daryl M. Lamson, Alexis Russel, Matthew Shudt, Melissa A Leisner, Jonathan Plitnick, Navjot Singh, John Kelly, Erasmus Schneider, Erica Lasek-Nesselquist                                                                                                                     |
| EPI_ISL_854350, EPI_ISL_854356, EPI_ISL_854358, EPI_ISL_854360                                                                                                                                                                                                                                                                                                                                                                                 | BIO-REFERENCE LABORATORIES                                                                               | Wadsworth Center, New York State Department of Health                            | Kirsten St. George, Daryl M. Lamson, Alexis Russel, Matthew Shudt, Melissa A Leisner, Jonathan Plitnick, Navjot Singh, John Kelly, Erasmus Schneider, Erica Lasek-Nesselquist                                                                                                                     |
| EPI_ISL_854368                                                                                                                                                                                                                                                                                                                                                                                                                                 | Wadsworth Center, New York State Department of Health                                                    | Wadsworth Center, New York State Department of Health                            | Kirsten St. George, Daryl M. Lamson, Alexis Russel, Matthew Shudt, Melissa A Leisner, Jonathan Plitnick, Navjot Singh, John Kelly, Erasmus Schneider, Erica Lasek-Nesselquist                                                                                                                     |
| EPI_ISL_854375, EPI_ISL_854380, EPI_ISL_854383, EPI_ISL_854387, EPI_ISL_854388, EPI_ISL_854392, EPI_ISL_854398                                                                                                                                                                                                                                                                                                                                 | WESTCHESTER MEDICAL CENTER                                                                               | Wadsworth Center, New York State Department of Health                            | Kirsten St. George, Daryl M. Lamson, Alexis Russel, Matthew Shudt, Melissa A Leisner, Jonathan Plitnick, Navjot Singh, John Kelly, Erasmus Schneider, Erica Lasek-Nesselquist                                                                                                                     |
| EPI_ISL_854410, EPI_ISL_854411, EPI_ISL_854412, EPI_ISL_854422, EPI_ISL_854423, EPI_ISL_854429, EPI_ISL_854435                                                                                                                                                                                                                                                                                                                                 | MONTEFIORE MEDICAL CENTER LABORATORIES                                                                   | Wadsworth Center, New York State Department of Health                            | Kirsten St. George, Daryl M. Lamson, Alexis Russel, Matthew Shudt, Melissa A Leisner, Jonathan Plitnick, Navjot Singh, John Kelly, Erasmus Schneider, Erica Lasek-Nesselquist                                                                                                                     |
| EPI_ISL_854438, EPI_ISL_854439, EPI_ISL_854441, EPI_ISL_854442, EPI_ISL_854443, EPI_ISL_854444                                                                                                                                                                                                                                                                                                                                                 | SARATOGA HOSPITAL LABORATORY                                                                             | Wadsworth Center, New York State Department of Health                            | Kirsten St. George, Daryl M. Lamson, Alexis Russel, Matthew Shudt, Melissa A Leisner, Jonathan Plitnick, Navjot Singh, John Kelly, Erasmus Schneider, Erica Lasek-Nesselquist                                                                                                                     |
| EPI_ISL_854446                                                                                                                                                                                                                                                                                                                                                                                                                                 | BOSTON HEART DIAGNOSTICS CORP                                                                            | Wadsworth Center, New York State Department of Health                            | Kirsten St. George, Daryl M. Lamson, Alexis Russel, Matthew Shudt, Melissa A Leisner, Jonathan Plitnick, Navjot Singh, John Kelly, Erasmus Schneider, Erica Lasek-Nesselquist                                                                                                                     |
| EPI_ISL_854455, EPI_ISL_854459                                                                                                                                                                                                                                                                                                                                                                                                                 | MONTEFIORE MEDICAL CENTER LABORATORIES                                                                   | Wadsworth Center, New York State Department of Health                            | Kirsten St. George, Daryl M. Lamson, Alexis Russel, Matthew Shudt, Melissa A Leisner, Jonathan Plitnick, Navjot Singh, John Kelly, Erasmus Schneider, Erica Lasek-Nesselquist                                                                                                                     |
| EPI_ISL_854892, EPI_ISL_854909, EPI_ISL_854923, EPI_ISL_854929, EPI_ISL_854934, EPI_ISL_854946, EPI_ISL_854959, EPI_ISL_854970, EPI_ISL_855124, EPI_ISL_855155, EPI_ISL_855168                                                                                                                                                                                                                                                                 | Quest Diagnostics                                                                                        | Quest Diagnostics                                                                | Rosenthal,S.H., Gerasimova,A., Kagan,R.M., Anderson, B., Hua, M., Liu Y., Bernstein, L.E., Livingston, K.E., Perez, A., Shalhout, D.F., Shlyakhter, I.A., Owen, R., Tanpaiboon, P., Lacbawan, F.                                                                                                  |
| see above                                                                                                                                                                                                                                                                                                                                                                                                                                      | Department of Virus and Microbiological Special Diagnostics, Statens Serum Institut, Copenhagen, Denmark | Aalborg University                                                               | Danish Covid-19 Genome Consortium                                                                                                                                                                                                                                                                 |
| EPI_ISL_855634                                                                                                                                                                                                                                                                                                                                                                                                                                 | Utah Public Health Laboratory                                                                            | Utah Public Health Laboratory                                                    | Erin L. Young, Kelly F. Oakeson, Tara Gallagher                                                                                                                                                                                                                                                   |
| EPI_ISL_856915, EPI_ISL_856943, EPI_ISL_856944                                                                                                                                                                                                                                                                                                                                                                                                 | Wyoming Public Health Laboratory                                                                         | Wyoming Public Health Laboratory                                                 | Noah Hull, Taylor Fearing, Lynette Gumbleton, Channing Weber, Ashley Norberg, Bailey Bowcutt, and Wanda Manley                                                                                                                                                                                    |
| EPI_ISL_859573, EPI_ISL_860028                                                                                                                                                                                                                                                                                                                                                                                                                 | BTC, Khalifa University                                                                                  | BTC, Khalifa University                                                          | Al Safar et al                                                                                                                                                                                                                                                                                    |
| EPI_ISL_860317                                                                                                                                                                                                                                                                                                                                                                                                                                 | Instituto Adolfo Lutz - Regional de Sorocaba                                                             | Instituto Adolfo Lutz, Interdisciplinary Procedures Center, Strategic Laboratory | Claudio Tavares Sacchi, Claudia Regina Gonçalves, Erica Valessa Ramos Gomes, Karoline Rodrigues Campos                                                                                                                                                                                            |
| EPI_ISL_860745                                                                                                                                                                                                                                                                                                                                                                                                                                 | Swiss National Reference Centre for Influenza                                                            | Swiss National Reference Centre for Influenza                                    | Ana Rita Gonçalves Cabecinhas, Samuel Cordey, Florian Laubscher, Christoph Grünig, Laurent Kaiser                                                                                                                                                                                                 |
| EPI_ISL_860983                                                                                                                                                                                                                                                                                                                                                                                                                                 | Johns Hopkins Hospital Department of Pathology                                                           | Johns Hopkins Hospital Department of Pathology                                   | C. Paul Morris, Chun Huai Luo, Adannaya Amadi, Nicholas Gallagher, Heba H. Mostafa                                                                                                                                                                                                                |
| EPI_ISL_861106                                                                                                                                                                                                                                                                                                                                                                                                                                 | KALEIDA CENTER FOR LABORATORY MEDICINE                                                                   | Wadsworth Center, New York State Department of Health                            | Kirsten St. George, Daryl M. Lamson, Alexis Russel, Matthew Shudt, Melissa A Leisner, Jonathan Plitnick, Navjot Singh, John Kelly, Erasmus Schneider, Erica Lasek-Nesselquist                                                                                                                     |
| EPI_ISL_861111, EPI_ISL_861113, EPI_ISL_861119                                                                                                                                                                                                                                                                                                                                                                                                 | New York Presbyterian Hospital                                                                           | Wadsworth Center, New York State Department of Health                            | Kirsten St. George, Daryl M. Lamson, Alexis Russel, Matthew Shudt, Melissa A Leisner, Jonathan Plitnick, Navjot Singh, John Kelly, Erasmus Schneider, Erica Lasek-Nesselquist                                                                                                                     |
| EPI_ISL_861144, EPI_ISL_861158, EPI_ISL_861161, EPI_ISL_861163, EPI_ISL_861169                                                                                                                                                                                                                                                                                                                                                                 | KALEIDA CENTER FOR LABORATORY MEDICINE                                                                   | Wadsworth Center, New York State Department of Health                            | Kirsten St. George, Daryl M. Lamson, Alexis Russel, Matthew Shudt, Melissa A Leisner, Jonathan Plitnick, Navjot Singh, John Kelly, Erasmus Schneider, Erica Lasek-Nesselquist                                                                                                                     |
| EPI_ISL_861178, EPI_ISL_861185                                                                                                                                                                                                                                                                                                                                                                                                                 | BIO-REFERENCE LABORATORIES                                                                               | Wadsworth Center, New York State Department of Health                            | Kirsten St. George, Daryl M. Lamson, Alexis Russel, Matthew Shudt, Melissa A Leisner, Jonathan Plitnick, Navjot Singh, John Kelly, Erasmus Schneider, Erica Lasek-Nesselquist                                                                                                                     |
| EPI_ISL_861191                                                                                                                                                                                                                                                                                                                                                                                                                                 | NORTH SHORE UNIVERSITY HOSPITAL                                                                          | Wadsworth Center, New York State Department of Health                            | Kirsten St. George, Daryl M. Lamson, Alexis Russel, Matthew Shudt, Melissa A Leisner, Jonathan Plitnick, Navjot Singh, John Kelly, Erasmus Schneider, Erica Lasek-Nesselquist                                                                                                                     |
| EPI_ISL_861206                                                                                                                                                                                                                                                                                                                                                                                                                                 | URMC LABS                                                                                                | Wadsworth Center, New York State Department of Health                            | Kirsten St. George, Daryl M. Lamson, Alexis Russel, Matthew Shudt, Melissa A Leisner, Jonathan Plitnick, Navjot Singh, John Kelly, Erasmus Schneider, Erica Lasek-Nesselquist                                                                                                                     |
| EPI_ISL_861211, EPI_ISL_861213, EPI_ISL_861217, EPI_ISL_861220, EPI_ISL_861230, EPI_ISL_861231                                                                                                                                                                                                                                                                                                                                                 | BIO-REFERENCE LABORATORIES                                                                               | Wadsworth Center, New York State Department of Health                            | Kirsten St. George, Daryl M. Lamson, Alexis Russel, Matthew Shudt, Melissa A Leisner, Jonathan Plitnick, Navjot Singh, John Kelly, Erasmus Schneider, Erica Lasek-Nesselquist                                                                                                                     |
| EPI_ISL_861244, EPI_ISL_861248, EPI_ISL_861249, EPI_ISL_861251, EPI_ISL_861253, EPI_ISL_861261, EPI_ISL_861262, EPI_ISL_861268, EPI_ISL_861280, EPI_ISL_861283, EPI_ISL_861284, EPI_ISL_861286, EPI_ISL_861287, EPI_ISL_861288, EPI_ISL_861289, EPI_ISL_861290, EPI_ISL_861295, EPI_ISL_861296, EPI_ISL_861298, EPI_ISL_861301, EPI_ISL_861308, EPI_ISL_861319, EPI_ISL_861320, EPI_ISL_861323, EPI_ISL_861327, EPI_ISL_861330, EPI_ISL_861331 | MONTEFIORE MEDICAL CENTER LABORATORIES                                                                   | Wadsworth Center, New York State Department of Health                            | Kirsten St. George, Daryl M. Lamson, Alexis Russel, Matthew Shudt, Melissa A Leisner, Jonathan Plitnick, Navjot Singh, John Kelly, Erasmus Schneider, Erica Lasek-Nesselquist                                                                                                                     |
| see above                                                                                                                                                                                                                                                                                                                                                                                                                                      | WESTCHESTER MEDICAL CENTER                                                                               | Wadsworth Center, New York State Department of Health                            | Kirsten St. George, Daryl M. Lamson, Alexis Russel, Matthew Shudt, Melissa A Leisner, Jonathan Plitnick, Navjot Singh, John Kelly, Erasmus Schneider, Erica Lasek-Nesselquist                                                                                                                     |
| EPI_ISL_861339, EPI_ISL_861345, EPI_ISL_861350, EPI_ISL_861357, EPI_ISL_861358, EPI_ISL_861360, EPI_ISL_861364, EPI_ISL_861368, EPI_ISL_861370, EPI_ISL_861373, EPI_ISL_861374, EPI_ISL_861377, EPI_ISL_861386, EPI_ISL_861389, EPI_ISL_861392, EPI_ISL_861397, EPI_ISL_861406                                                                                                                                                                 | OHSH Lab Services Molecular Microbiology Lab                                                             | Oregon SARS-CoV-2 Genome Sequencing Center                                       | Brendan L. O'Connell, Sally Grindstaff, Kayla Carter, Ruth V. Nichols, Alec J. Hirsch, Donna Hansel, Guang Fan, Xuan Qin, Daniel N. Streblov, William B. Messer, Andrew C. Adey, Benjamin N. Bimber, Brian J. O'Roak                                                                              |
| see above                                                                                                                                                                                                                                                                                                                                                                                                                                      | OHSU Lab Services Molecular Microbiology Lab                                                             | Oregon SARS-CoV-2 Genome Sequencing Center                                       | Brendan L. O'Connell, Sally Grindstaff, Kayla Carter, Ruth V. Nichols, Alec J. Hirsch, Donna Hansel, Guang Fan, Xuan Qin, Daniel N. Streblov, William B. Messer, Andrew C. Adey, Benjamin N. Bimber, Brian J. O'Roak                                                                              |
| EPI_ISL_862004                                                                                                                                                                                                                                                                                                                                                                                                                                 | OHSU Lab Services Molecular Microbiology Lab                                                             | Oregon SARS-CoV-2 Genome Sequencing Center                                       | Brendan L. O'Connell, Sally Grindstaff, Kayla Carter, Ruth V. Nichols, Alec J. Hirsch, Donna Hansel, Guang Fan, Xuan Qin, Daniel N. Streblov, William B. Messer, Andrew C. Adey, Benjamin N. Bimber, Brian J. O'Roak                                                                              |
| EPI_ISL_862673, EPI_ISL_862706, EPI_ISL_862713                                                                                                                                                                                                                                                                                                                                                                                                 | New Mexico Department of Health Scientific Laboratory                                                    | New Mexico Department of Health Scientific Laboratory                            | D'eldra Malone, Ellie Johnson, Anastacia Griego-Fisher                                                                                                                                                                                                                                            |
| EPI_ISL_863197                                                                                                                                                                                                                                                                                                                                                                                                                                 | Lighthouse Lab in Alderley Park                                                                          | Wellcome Sanger Institute for the COVID-19 Genomics UK (COG-UK) Consortium       | Jacquelyn Wynn, Mairead Hyland, The Lighthouse Lab in Alderley Park and Alex Alderton, Roberto Amato, Sonia Goncalves, Ewan Harrison, David K. Jackson, Ian Johnston, Dominic Kwiatkowski, Cordelia Langford, John Sillitoe on behalf of the Wellcome Sanger Institute COVID-19 Surveillance Team |

|                                                                                                                                         |                                                                                                                                                                                                                                                                                                                                                                                                                                                                                               |                                                                                                                                                                        |                                                                                                                                                                                                                                                                                                                                                                                                                                                                                                                                                                                                                                                                                                                                                                                                                                                             |
|-----------------------------------------------------------------------------------------------------------------------------------------|-----------------------------------------------------------------------------------------------------------------------------------------------------------------------------------------------------------------------------------------------------------------------------------------------------------------------------------------------------------------------------------------------------------------------------------------------------------------------------------------------|------------------------------------------------------------------------------------------------------------------------------------------------------------------------|-------------------------------------------------------------------------------------------------------------------------------------------------------------------------------------------------------------------------------------------------------------------------------------------------------------------------------------------------------------------------------------------------------------------------------------------------------------------------------------------------------------------------------------------------------------------------------------------------------------------------------------------------------------------------------------------------------------------------------------------------------------------------------------------------------------------------------------------------------------|
| EPI_ISL_869220, EPI_ISL_869223                                                                                                          | New Mexico Department of Health Scientific Laboratory                                                                                                                                                                                                                                                                                                                                                                                                                                         | Center for Global Health, University of New Mexico Health Sciences Center                                                                                              | Daryl Domman, Kurt Schwalm, Twila Kunde, Joseph Hicks, Anastacia Griego, Michael Edwards, Darrell Dinwiddie                                                                                                                                                                                                                                                                                                                                                                                                                                                                                                                                                                                                                                                                                                                                                 |
| EPI_ISL_871841, EPI_ISL_871871<br>EPI_ISL_871973                                                                                        | Wyoming Public Health Laboratory<br>Hospital Universitario Severo Ochoa                                                                                                                                                                                                                                                                                                                                                                                                                       | Wyoming Public Health Laboratory<br>Instituto de Salud Carlos III                                                                                                      | Noah Hull, Taylor Fearing, Lynette Gumbleton, Channing Weber, Ashley Norberg, Bailey Bowcutt, and Wanda Manley<br>Iglesias-Caballero, M. Camarero, S. Molinero Calamita, M. González-Esguevillas, M. Pozo, F. Casas, I. Jiménez, P. Jiménez, M. Zaballos, A. Monzón, S. Varona, S. Juliá, M. Cuesta, I. García, M.L.                                                                                                                                                                                                                                                                                                                                                                                                                                                                                                                                        |
| EPI_ISL_872027                                                                                                                          | Ospedale "Di Venere"                                                                                                                                                                                                                                                                                                                                                                                                                                                                          | Beaconlab (Bioinformatics, Evolution and Comparative Genomics lab), Dept of Biosciences, University on Milan                                                           | Iacobellis M, d'Avenia M, Piluscio R, Parisi A, Chiara M, Manzari C, Pesole G                                                                                                                                                                                                                                                                                                                                                                                                                                                                                                                                                                                                                                                                                                                                                                               |
| EPI_ISL_872408, EPI_ISL_872420,<br>EPI_ISL_872431, EPI_ISL_872465                                                                       | Eurofins Diatherix                                                                                                                                                                                                                                                                                                                                                                                                                                                                            | Hudsonalpha Genome Sequencing Center                                                                                                                                   | Jane Grimwood, Melissa Williams, Lori H. Handley, Joshua Stough, Leslie Malone, Stefan Brzezinski, Ada Stewart, Teresa Jones, Jenell Webber, John Lovell, Jennifer Cart, and Jeremy Schmutz                                                                                                                                                                                                                                                                                                                                                                                                                                                                                                                                                                                                                                                                 |
| EPI_ISL_872495, EPI_ISL_872523,<br>EPI_ISL_872557                                                                                       | New Mexico Department of Health Scientific Laboratory                                                                                                                                                                                                                                                                                                                                                                                                                                         | Center for Global Health, University of New Mexico Health Sciences Center                                                                                              | Daryl Domman, Kurt Schwalm, Twila Kunde, Joseph Hicks, Anastacia Griego, Michael Edwards, Darrell Dinwiddie                                                                                                                                                                                                                                                                                                                                                                                                                                                                                                                                                                                                                                                                                                                                                 |
| EPI_ISL_872577                                                                                                                          | South Eastern Area Laboratory Services (SEALS)                                                                                                                                                                                                                                                                                                                                                                                                                                                | NSW Health Pathology - Institute of Clinical Pathology and Medical Research; Westmead Hospital; University of Sydney                                                   | CIDM-PH et al.                                                                                                                                                                                                                                                                                                                                                                                                                                                                                                                                                                                                                                                                                                                                                                                                                                              |
| EPI_ISL_872626                                                                                                                          | Nigeria Centre for Disease Control (NCDC)                                                                                                                                                                                                                                                                                                                                                                                                                                                     | African Centre of Excellence for Genomics of Infectious Diseases (ACEGID), Redeemer's University                                                                       | Oluniyi P.E. et al                                                                                                                                                                                                                                                                                                                                                                                                                                                                                                                                                                                                                                                                                                                                                                                                                                          |
| EPI_ISL_872751                                                                                                                          | Colorado Mesa University                                                                                                                                                                                                                                                                                                                                                                                                                                                                      | Infectious Disease Program, Broad Institute of Harvard and MIT                                                                                                         | Lemieux,J.E., Siddle,K.J., Marshall,J., O'Neill,M., Bronson,A., Adams,G., Gladden-Young,A., Lagerborg,K., Rudy,M., DeRuff,K., Carter,A., Normandin,E., Bauer,M., Reilly,S., Tomkins-Tinch,C., Loreth,C., Chaluvadi,S., Birren,B.W., Gallagher,G., Smole,S., Park,D.J., MacInnis,B.L., and Sabeti,P.C.                                                                                                                                                                                                                                                                                                                                                                                                                                                                                                                                                       |
| EPI_ISL_872781, EPI_ISL_872820                                                                                                          | University of Wisconsin-Madison AIDS Vaccine Research Laboratories                                                                                                                                                                                                                                                                                                                                                                                                                            | University of Wisconsin-Madison AIDS Vaccine Research Laboratories                                                                                                     | Gage Moreno, Katarina Braun, et al. AIDS Vaccine Research Laboratories                                                                                                                                                                                                                                                                                                                                                                                                                                                                                                                                                                                                                                                                                                                                                                                      |
| EPI_ISL_873116                                                                                                                          | University of Michigan Clinical Microbiology Laboratory                                                                                                                                                                                                                                                                                                                                                                                                                                       | Lauring Lab, University of Michigan, Department of Microbiology and Immunology                                                                                         | Valesano                                                                                                                                                                                                                                                                                                                                                                                                                                                                                                                                                                                                                                                                                                                                                                                                                                                    |
| EPI_ISL_873190                                                                                                                          | Microbiology Division, South Carolina Department of Health and Environmental Control (SC DHEC)                                                                                                                                                                                                                                                                                                                                                                                                | Microbiology Division, South Carolina Department of Health and Environmental Control (SC DHEC)                                                                         | Flores,H., Freeman,J.                                                                                                                                                                                                                                                                                                                                                                                                                                                                                                                                                                                                                                                                                                                                                                                                                                       |
| EPI_ISL_875588, EPI_ISL_875589,<br>EPI_ISL_875656, EPI_ISL_875887                                                                       | Eurofins Diatherix                                                                                                                                                                                                                                                                                                                                                                                                                                                                            | Hudsonalpha Genome Sequencing Center                                                                                                                                   | Jane Grimwood, Melissa Williams, Lori H. Handley, Joshua Stough, Leslie Malone, Stefan Brzezinski, Ada Stewart, Teresa Jones, Jenell Webber, John Lovell, Jennifer Cart, and Jeremy Schmutz                                                                                                                                                                                                                                                                                                                                                                                                                                                                                                                                                                                                                                                                 |
| EPI_ISL_876112, EPI_ISL_876141,<br>EPI_ISL_876231, EPI_ISL_876234,<br>EPI_ISL_876245                                                    | Massachusetts State Public Health Laboratory                                                                                                                                                                                                                                                                                                                                                                                                                                                  | Massachusetts State Public Health Laboratory                                                                                                                           | Andrew Lang, Timelia Fink, Glen Gallagher, Sandra Smole                                                                                                                                                                                                                                                                                                                                                                                                                                                                                                                                                                                                                                                                                                                                                                                                     |
| EPI_ISL_876403, EPI_ISL_876437,<br>EPI_ISL_876454, EPI_ISL_876457,<br>EPI_ISL_876502                                                    | Eurofins Diatherix                                                                                                                                                                                                                                                                                                                                                                                                                                                                            | Hudsonalpha Genome Sequencing Center                                                                                                                                   | Jane Grimwood, Melissa Williams, Lori H. Handley, Joshua Stough, Leslie Malone, Stefan Brzezinski, Ada Stewart, Teresa Jones, Jenell Webber, John Lovell, Jennifer Cart, and Jeremy Schmutz                                                                                                                                                                                                                                                                                                                                                                                                                                                                                                                                                                                                                                                                 |
| EPI_ISL_876922                                                                                                                          | Quest Diagnostics                                                                                                                                                                                                                                                                                                                                                                                                                                                                             | Quest Diagnostics                                                                                                                                                      | Rosenthal,S.H., Gerasimova,A., Kagan,R.M., Anderson, B., Hua, M., Liu Y., Bernstein, L.E., Livingston, K.E., Perez, A., Shalhout, D.F., Shlyakhter, I.A., Owen, R., Tanpaiboon, P., Lacbawan, F.                                                                                                                                                                                                                                                                                                                                                                                                                                                                                                                                                                                                                                                            |
| EPI_ISL_876989                                                                                                                          | 1.AO Universitaria 'S. Giovanni di Dio e Ruggi D'Aragona, Scuola Medica Salernitana' Hospital / 2.UOC di Virologia e Microbiologia, Università della Campania 'L. Vanvitelli' / 3.AO Universitaria 'Federico II' Napoli Hospital / 4.AORN 'San Giuseppe Moscati' Avellino Hospital / 5.AO 'San Pio - presidio G. Rummo' Benevento Hospital / 6.AO 'Sant'Anna e San Sebastiano' Caserta Hospital / 7.PO 'Maria Santissima Addolorata' Eboli Hospital / 8.Biogen Istituto di Ricerche Genetiche | 1. Genome Research Center for Health (CRGS) / 2. Laboratory of Molecular Medicine and Genomics(LMMGe) / 3. Center for Research in Pure and Applied Mathematics (CRMPA) | Giorgio Giurato (Corresponding Author), Francesca Rizzo (Corresponding Author), Alessandro Weisz (Corresponding Author), Gianluigi Franci, Giovanni Nassa, Pasquale Pagliano, Roberta Tarallo, Elena Alexandrova, Ylenia D'Agostino, Carlo Ferravante, Jessica Lamberti, Viola Melone, Domenico Memoli, Valeria Mirici Cappa, Domenico Palumbo, Giovanni Pecoraro, Assunta Sellitto, Oriana Strianese, Ilaria Terenzi, Giuseppe Fenza, Aniello Gentile, Antonello Saccomanno, Sonia Amabile, Teresa Rocco, Annamaria Salvati, Emilia Vaccaro, Massimiliano Galdiero, Michele Cennamo, Giuseppe Portella, Maria Grazia Foti, Mariarosaria Ingino, Maria Landi, Maurizio Fumi, Vincenzo Rocco, Rita Greco, Vittoria Letizia, Arnolfo Petruzzello, Maddalena Schioppa, Gregorio Goffredi, Francesca Marciano, Michele Caraglia, Alessia Cossu, Marianna Scrima |
| EPI_ISL_877140, EPI_ISL_877159                                                                                                          | Univeristy of New Mexico Hospital                                                                                                                                                                                                                                                                                                                                                                                                                                                             | Center for Global Health, University of New Mexico Health Sciences Center                                                                                              | Daryl Domman, Kurt Schwalm, Justin Bacca, Jon Fleming, Darrell Dinwiddie                                                                                                                                                                                                                                                                                                                                                                                                                                                                                                                                                                                                                                                                                                                                                                                    |
| EPI_ISL_877219                                                                                                                          | Canterbury Health Laboratories                                                                                                                                                                                                                                                                                                                                                                                                                                                                | Institute of Environmental Science and Research (ESR)                                                                                                                  | Xiaoyun Ren, Matt Storey, Nikki Freed, Muhammad Faisal, Jing Wang, Hermes Perez, Anja Werno, Antje van der Linden, Arlo Upton, Chris Mansell, David Hammer, Dragana Drinkovic, Gary McAuliffe, Hana Sofia Andersson, James Ussher, Jill Sherwood, Josh Freeman, Julia Howard, Juliet Ely, Mary DeAlmeida, Matt Blakiston, Matthew Rogers, Max Bloomfield, Michael Addidle, Michelle Balm, Sally Roberts, Sarah Jefferies, Sharmini Muttaiyah, Susan Morpeth, Susan Taylor, Timothy Blackmore, Vani Sathyendran, Veronica Playle, Virginia Hope, Erasmus Smit, Lauren Jelly, Olin Silander, Joep de Ligst                                                                                                                                                                                                                                                    |
| EPI_ISL_877248, EPI_ISL_877309,<br>EPI_ISL_877317, EPI_ISL_877341,<br>EPI_ISL_877372, EPI_ISL_877415,<br>EPI_ISL_877464, EPI_ISL_877490 | Eurofins Diatherix                                                                                                                                                                                                                                                                                                                                                                                                                                                                            | Hudsonalpha Genome Sequencing Center                                                                                                                                   | Jane Grimwood, Melissa Williams, Lori H. Handley, Joshua Stough, Leslie Malone, Stefan Brzezinski, Ada Stewart, Teresa Jones, Jenell Webber, John Lovell, Jennifer Cart, and Jeremy Schmutz                                                                                                                                                                                                                                                                                                                                                                                                                                                                                                                                                                                                                                                                 |
| EPI_ISL_877561                                                                                                                          | Institute of Microbiology, Universidad San Francisco de Quito                                                                                                                                                                                                                                                                                                                                                                                                                                 | Institute of Microbiology, Universidad San Francisco de Quito                                                                                                          | Belén Prado-Vivar, Sully Márquez, Juan José Guadalupe, Monica Becerra-Wong, Bernardo Gutiérrez, Manuel Jibaja, Maribel Cruz, Nelson Remache, Milton Tobar, Alexandra Noboa, Ana Diaz, Diego Morochó, Sayra Caiza, Diego Mora, Edgar Espinoza, Pablo Flores, Juan Monge, Vanesa Ramirez, Cristian Pelaez, Fernando Martínez, Jorge Caamaño, Marco Jimenez, Hector Moya, Veronica Paredes, Eduardo Males, Fabricio Picoita, Andres Moreno, Fernanda Garcia, Viviana Medina, Verónica Barragán, Patricio Rojas-Silva, Gabriel Trueba, Michelle Grunauer, Paul Cárdenas                                                                                                                                                                                                                                                                                         |
| EPI_ISL_877572                                                                                                                          | Microbiological Diagnostic Unit - Public Health Laboratory (MDU-PHL)                                                                                                                                                                                                                                                                                                                                                                                                                          | MDU-PHL                                                                                                                                                                | Seemann T., Sait, M.L., Shery, N.L.                                                                                                                                                                                                                                                                                                                                                                                                                                                                                                                                                                                                                                                                                                                                                                                                                         |
| EPI_ISL_878276, EPI_ISL_878373,<br>EPI_ISL_878434                                                                                       | San Diego County Public Health Laboratory                                                                                                                                                                                                                                                                                                                                                                                                                                                     | Andersen lab at Scripps Research                                                                                                                                       | SEARCH Alliance San Diego with Tracy Basler, Jovan Shephard, Brett Austin                                                                                                                                                                                                                                                                                                                                                                                                                                                                                                                                                                                                                                                                                                                                                                                   |
| EPI_ISL_878557                                                                                                                          | Robert Garry lab                                                                                                                                                                                                                                                                                                                                                                                                                                                                              | Andersen lab at Scripps Research                                                                                                                                       | Allison Smither, Gilberto Sabino-Santos, Patricia Snarski, Lilia Melnik, Antoinette Bell, Kaylynn Genemaras, Arnaud Drouin, Dahlene Fusco, Robert Garry with SEARCH Alliance San Diego                                                                                                                                                                                                                                                                                                                                                                                                                                                                                                                                                                                                                                                                      |
| EPI_ISL_879101                                                                                                                          | Lighthouse Lab in Alderley Park                                                                                                                                                                                                                                                                                                                                                                                                                                                               | Wellcome Sanger Institute for the COVID-19 Genomics UK (COG-UK) Consortium                                                                                             | Jacquelyn Wynn, Mairead Hyland, The Lighthouse Lab in Alderley Park and Alex Alderton, Roberto Amato, Sonia Goncalves, Ewan Harrison, David K. Jackson, Ian Johnston, Dominic Kwiatkowski, Cordelia Langford, John Sillitoe on behalf of the Wellcome Sanger Institute COVID-19 Surveillance Team                                                                                                                                                                                                                                                                                                                                                                                                                                                                                                                                                           |
| EPI_ISL_880179<br>EPI_ISL_880233                                                                                                        | Rady's Childrens Hospital<br>Scripps Medical Laboratory                                                                                                                                                                                                                                                                                                                                                                                                                                       | Andersen lab at Scripps Research<br>Andersen lab at Scripps Research                                                                                                   | SEARCH Alliance San Diego with Nanda Radamchar, David Dimmock, Linda Luo, Christina Clarke, Kathryn Bouic, Teresa Mueller, Denise Malicki<br>SEARCH Alliance San Diego with Michael Quigley, Ellen Stefanski, Ian Mchardy                                                                                                                                                                                                                                                                                                                                                                                                                                                                                                                                                                                                                                   |
| EPI_ISL_882661, EPI_ISL_882662                                                                                                          | Hospital de Santa Barbara de Goias                                                                                                                                                                                                                                                                                                                                                                                                                                                            | Instituto Adolfo Lutz, Interdisciplinary Procedures Center, Strategic Laboratory                                                                                       | Claudio Tavares Sacchi, Claudia Regina Gonçalves, Erica Valessa Ramos Gomes, Karoline Rodrigues Campos                                                                                                                                                                                                                                                                                                                                                                                                                                                                                                                                                                                                                                                                                                                                                      |
| EPI_ISL_882663, EPI_ISL_882664                                                                                                          | LACEN do Distrito Federal                                                                                                                                                                                                                                                                                                                                                                                                                                                                     | Instituto Adolfo Lutz, Interdisciplinary Procedures Center, Strategic Laboratory                                                                                       | Claudio Tavares Sacchi, Claudia Regina Gonçalves, Erica Valessa Ramos Gomes, Karoline Rodrigues Campos                                                                                                                                                                                                                                                                                                                                                                                                                                                                                                                                                                                                                                                                                                                                                      |
| EPI_ISL_882670                                                                                                                          | Hospital Samaritano Paulista                                                                                                                                                                                                                                                                                                                                                                                                                                                                  | Instituto Adolfo Lutz, Interdisciplinary Procedures Center, Strategic Laboratory                                                                                       | Claudio Tavares Sacchi, Claudia Regina Gonçalves, Erica Valessa Ramos Gomes, Karoline Rodrigues Campos                                                                                                                                                                                                                                                                                                                                                                                                                                                                                                                                                                                                                                                                                                                                                      |

|                                                                                                                                                                                                                                                |                                                                                                |                                                                                                                        |                                                                                                                                                                                                                                                                                                                                                                                                                                                                                                                                                                                                                                                                                                                                                     |                                                                                                                                                                                                                                                                                                                                                                                                                                                                                                                                                                                                                                                                                                                                                                                                                                                    |
|------------------------------------------------------------------------------------------------------------------------------------------------------------------------------------------------------------------------------------------------|------------------------------------------------------------------------------------------------|------------------------------------------------------------------------------------------------------------------------|-----------------------------------------------------------------------------------------------------------------------------------------------------------------------------------------------------------------------------------------------------------------------------------------------------------------------------------------------------------------------------------------------------------------------------------------------------------------------------------------------------------------------------------------------------------------------------------------------------------------------------------------------------------------------------------------------------------------------------------------------------|----------------------------------------------------------------------------------------------------------------------------------------------------------------------------------------------------------------------------------------------------------------------------------------------------------------------------------------------------------------------------------------------------------------------------------------------------------------------------------------------------------------------------------------------------------------------------------------------------------------------------------------------------------------------------------------------------------------------------------------------------------------------------------------------------------------------------------------------------|
| EPI_ISL_883071, EPI_ISL_883084, EPI_ISL_883136, EPI_ISL_883195, EPI_ISL_883263                                                                                                                                                                 | Eurofins Diatherix                                                                             | Hudsonalpha Genome Sequencing Center                                                                                   | Jane Grimwood, Melissa Williams, Lori H. Handley, Joshua Stough, Leslie Malone, Stefan Brzezinski, Ada Stewart, Teresa Jones, Jenell Webber, John Lovell, Jennifer Cart, and Jeremy Schmutz                                                                                                                                                                                                                                                                                                                                                                                                                                                                                                                                                         |                                                                                                                                                                                                                                                                                                                                                                                                                                                                                                                                                                                                                                                                                                                                                                                                                                                    |
| EPI_ISL_883427, EPI_ISL_883428                                                                                                                                                                                                                 | NORTHWELL HEALTH LABORATORIES                                                                  | Wadsworth Center, New York State Department of Health                                                                  | Kirsten St. George, Daryl M. Lamson, Alexis Russel, Matthew Shudt, Melissa A Leisner, Jonathan Plitnick, Navjot Singh, John Kelly, Erasmus Schneider, Erica Lasek-Nesselquist                                                                                                                                                                                                                                                                                                                                                                                                                                                                                                                                                                       |                                                                                                                                                                                                                                                                                                                                                                                                                                                                                                                                                                                                                                                                                                                                                                                                                                                    |
| EPI_ISL_883429, EPI_ISL_883430                                                                                                                                                                                                                 | BOSTON HEART DIAGNOSTICS CORP                                                                  | Wadsworth Center, New York State Department of Health                                                                  | Kirsten St. George, Daryl M. Lamson, Alexis Russel, Matthew Shudt, Melissa A Leisner, Jonathan Plitnick, Navjot Singh, John Kelly, Erasmus Schneider, Erica Lasek-Nesselquist                                                                                                                                                                                                                                                                                                                                                                                                                                                                                                                                                                       |                                                                                                                                                                                                                                                                                                                                                                                                                                                                                                                                                                                                                                                                                                                                                                                                                                                    |
| EPI_ISL_883431, EPI_ISL_883445, EPI_ISL_883471, EPI_ISL_883475, EPI_ISL_883476, EPI_ISL_883477, EPI_ISL_883484, EPI_ISL_883488, EPI_ISL_883496                                                                                                 | NORTHWELL HEALTH LABORATORIES                                                                  | Wadsworth Center, New York State Department of Health                                                                  | Kirsten St. George, Daryl M. Lamson, Alexis Russel, Matthew Shudt, Melissa A Leisner, Jonathan Plitnick, Navjot Singh, John Kelly, Erasmus Schneider, Erica Lasek-Nesselquist                                                                                                                                                                                                                                                                                                                                                                                                                                                                                                                                                                       |                                                                                                                                                                                                                                                                                                                                                                                                                                                                                                                                                                                                                                                                                                                                                                                                                                                    |
| EPI_ISL_883502, EPI_ISL_883526, EPI_ISL_883527, EPI_ISL_883583, EPI_ISL_883620, EPI_ISL_883632, EPI_ISL_883652, EPI_ISL_883734, EPI_ISL_883754, EPI_ISL_883836, EPI_ISL_883875, EPI_ISL_883890, EPI_ISL_883896, EPI_ISL_883911, EPI_ISL_883941 | see above                                                                                      | Eurofins Diatherix                                                                                                     | Hudsonalpha Genome Sequencing Center                                                                                                                                                                                                                                                                                                                                                                                                                                                                                                                                                                                                                                                                                                                | Jane Grimwood, Melissa Williams, Lori H. Handley, Joshua Stough, Leslie Malone, Stefan Brzezinski, Ada Stewart, Teresa Jones, Jenell Webber, John Lovell, Jennifer Cart, and Jeremy Schmutz                                                                                                                                                                                                                                                                                                                                                                                                                                                                                                                                                                                                                                                        |
| EPI_ISL_884046                                                                                                                                                                                                                                 | ALBANY MEDICAL CENTER HOSPITAL CLINICAL LABORATORIES                                           | Wadsworth Center, New York State Department of Health                                                                  | Kirsten St. George, Daryl M. Lamson, Alexis Russel, Matthew Shudt, Melissa A Leisner, Jonathan Plitnick, Navjot Singh, John Kelly, Erasmus Schneider, Erica Lasek-Nesselquist                                                                                                                                                                                                                                                                                                                                                                                                                                                                                                                                                                       |                                                                                                                                                                                                                                                                                                                                                                                                                                                                                                                                                                                                                                                                                                                                                                                                                                                    |
| EPI_ISL_884055                                                                                                                                                                                                                                 | Wadsworth Center, New York State Department of Health                                          | Wadsworth Center, New York State Department of Health                                                                  | Kirsten St. George, Daryl M. Lamson, Alexis Russel, Matthew Shudt, Melissa A Leisner, Jonathan Plitnick, Navjot Singh, John Kelly, Erasmus Schneider, Erica Lasek-Nesselquist                                                                                                                                                                                                                                                                                                                                                                                                                                                                                                                                                                       |                                                                                                                                                                                                                                                                                                                                                                                                                                                                                                                                                                                                                                                                                                                                                                                                                                                    |
| EPI_ISL_884067, EPI_ISL_884073                                                                                                                                                                                                                 | ALBANY MEDICAL CENTER HOSPITAL CLINICAL LABORATORIES                                           | Wadsworth Center, New York State Department of Health                                                                  | Kirsten St. George, Daryl M. Lamson, Alexis Russel, Matthew Shudt, Melissa A Leisner, Jonathan Plitnick, Navjot Singh, John Kelly, Erasmus Schneider, Erica Lasek-Nesselquist                                                                                                                                                                                                                                                                                                                                                                                                                                                                                                                                                                       |                                                                                                                                                                                                                                                                                                                                                                                                                                                                                                                                                                                                                                                                                                                                                                                                                                                    |
| EPI_ISL_884080                                                                                                                                                                                                                                 | Wadsworth Center, New York State Department of Health                                          | Wadsworth Center, New York State Department of Health                                                                  | Kirsten St. George, Daryl M. Lamson, Alexis Russel, Matthew Shudt, Melissa A Leisner, Jonathan Plitnick, Navjot Singh, John Kelly, Erasmus Schneider, Erica Lasek-Nesselquist                                                                                                                                                                                                                                                                                                                                                                                                                                                                                                                                                                       |                                                                                                                                                                                                                                                                                                                                                                                                                                                                                                                                                                                                                                                                                                                                                                                                                                                    |
| EPI_ISL_884082, EPI_ISL_884085                                                                                                                                                                                                                 | ALBANY MEDICAL CENTER HOSPITAL CLINICAL LABORATORIES                                           | Wadsworth Center, New York State Department of Health                                                                  | Kirsten St. George, Daryl M. Lamson, Alexis Russel, Matthew Shudt, Melissa A Leisner, Jonathan Plitnick, Navjot Singh, John Kelly, Erasmus Schneider, Erica Lasek-Nesselquist                                                                                                                                                                                                                                                                                                                                                                                                                                                                                                                                                                       |                                                                                                                                                                                                                                                                                                                                                                                                                                                                                                                                                                                                                                                                                                                                                                                                                                                    |
| EPI_ISL_884117, EPI_ISL_884118, EPI_ISL_884122, EPI_ISL_884168                                                                                                                                                                                 | Eurofins Diatherix                                                                             | Hudsonalpha Genome Sequencing Center                                                                                   | Jane Grimwood, Melissa Williams, Lori H. Handley, Joshua Stough, Leslie Malone, Stefan Brzezinski, Ada Stewart, Teresa Jones, Jenell Webber, John Lovell, Jennifer Cart, and Jeremy Schmutz                                                                                                                                                                                                                                                                                                                                                                                                                                                                                                                                                         |                                                                                                                                                                                                                                                                                                                                                                                                                                                                                                                                                                                                                                                                                                                                                                                                                                                    |
| EPI_ISL_884370, EPI_ISL_884415                                                                                                                                                                                                                 | Infectious Diseases, Quest Diagnostics                                                         | Infectious Diseases, Quest Diagnostics                                                                                 | Rosenthal,S.H., Gerasimova,A., Kagan,R.M., Anderson,B., Bernstein,L.E., Livingston,K.E., Hua,M., Liu,Y., Shalhout,D.F., Owen,R., Lacbawan,F.                                                                                                                                                                                                                                                                                                                                                                                                                                                                                                                                                                                                        |                                                                                                                                                                                                                                                                                                                                                                                                                                                                                                                                                                                                                                                                                                                                                                                                                                                    |
| EPI_ISL_884955, EPI_ISL_884987                                                                                                                                                                                                                 | Santa Clara County Public Health Laboratory                                                    | Chan-Zuckerberg Biohub                                                                                                 | CZB Cllahub Consortium                                                                                                                                                                                                                                                                                                                                                                                                                                                                                                                                                                                                                                                                                                                              |                                                                                                                                                                                                                                                                                                                                                                                                                                                                                                                                                                                                                                                                                                                                                                                                                                                    |
| EPI_ISL_885133                                                                                                                                                                                                                                 | California Institute of Technology                                                             | Chan-Zuckerberg Biohub                                                                                                 | CZB Cllahub Consortium                                                                                                                                                                                                                                                                                                                                                                                                                                                                                                                                                                                                                                                                                                                              |                                                                                                                                                                                                                                                                                                                                                                                                                                                                                                                                                                                                                                                                                                                                                                                                                                                    |
| EPI_ISL_886182, EPI_ISL_886313, EPI_ISL_886400, EPI_ISL_886555, EPI_ISL_886559, EPI_ISL_886560, EPI_ISL_886721, EPI_ISL_886722, EPI_ISL_886794, EPI_ISL_886826, EPI_ISL_887002, EPI_ISL_887043, EPI_ISL_887078                                 | see above                                                                                      | Labcorp                                                                                                                | Genomics and Discovery, Respiratory Viruses Branch, Division of Viral Diseases, Centers for Disease Control and Prevention                                                                                                                                                                                                                                                                                                                                                                                                                                                                                                                                                                                                                          | Peter W. Cook,Dhwani Batra,Ben L. Rambo-Martin,Summer Galloway,Brian Krueger,Minoo Agarwal,Eyad Almasri,Debbie Boles,Ayla Burns,Nuthawin Charoensri,Oren Cohen,Susan Countryman,Mary Ann Cristobal,Bobbi Croy,Suzanne Dale,Hrushikesh Deshmukh,Amanda Douglas,Vincent Drouillon,Marcia Eisenberg,Howard Engler,Rama Ghatti,Prashant Gupta,Susan Hicks,Jake Humphrey,Lax Iyer,Manoj Jain,Mohan Koli,Tim Kuphal,Stanley Letovsky,Michael Levandoski,Craig Lukasik,Jonathan Meltzer,Brian Norvell,Mindy Nye,Scott Parker,Christos Petropoulos,John Pruitt,Steven Ragan,Scott Ryan,Mike Sapeta,Jana Schroth,Suresh Babu Selvaraju,Goran Stevovic,Amanda Suchanek,Andrea Throop,Lyndon Tilson,Thomas Urban,Joe Voshell,Kimberly Wagner,Jonathan Williams,Mary Williamson,Qian Zeng,Tricia Zwiefelhofer,Clinton R. Paden,Suxiang Tong,Duncan MacCannell, |
| EPI_ISL_887505                                                                                                                                                                                                                                 | Instituto Nacional de Saude (INS), Mozambique                                                  | KRISP, KZN Research Innovation and Sequencing Platform                                                                 | Nalia Ismael, Nadia Siteo, Paulo Arnaldo, Nedio Mabunda, Giandhari J, Pillay S, Tegally H, Wilkinson E, de Oliveira T                                                                                                                                                                                                                                                                                                                                                                                                                                                                                                                                                                                                                               |                                                                                                                                                                                                                                                                                                                                                                                                                                                                                                                                                                                                                                                                                                                                                                                                                                                    |
| EPI_ISL_887751, EPI_ISL_887755, EPI_ISL_887778, EPI_ISL_887880, EPI_ISL_887999, EPI_ISL_888008, EPI_ISL_888026, EPI_ISL_888058, EPI_ISL_888127, EPI_ISL_888488, EPI_ISL_888508                                                                 | see above                                                                                      | Labcorp                                                                                                                | Genomics and Discovery, Respiratory Viruses Branch, Division of Viral Diseases, Centers for Disease Control and Prevention                                                                                                                                                                                                                                                                                                                                                                                                                                                                                                                                                                                                                          | Peter W. Cook,Dhwani Batra,Ben L. Rambo-Martin,Summer Galloway,Brian Krueger,Minoo Agarwal,Eyad Almasri,Debbie Boles,Ayla Burns,Nuthawin Charoensri,Oren Cohen,Susan Countryman,Mary Ann Cristobal,Bobbi Croy,Suzanne Dale,Hrushikesh Deshmukh,Amanda Douglas,Vincent Drouillon,Marcia Eisenberg,Howard Engler,Rama Ghatti,Prashant Gupta,Susan Hicks,Jake Humphrey,Lax Iyer,Manoj Jain,Mohan Koli,Tim Kuphal,Stanley Letovsky,Michael Levandoski,Craig Lukasik,Jonathan Meltzer,Brian Norvell,Mindy Nye,Scott Parker,Christos Petropoulos,John Pruitt,Steven Ragan,Scott Ryan,Mike Sapeta,Jana Schroth,Suresh Babu Selvaraju,Goran Stevovic,Amanda Suchanek,Andrea Throop,Lyndon Tilson,Thomas Urban,Joe Voshell,Kimberly Wagner,Jonathan Williams,Mary Williamson,Qian Zeng,Tricia Zwiefelhofer,Clinton R. Paden,Suxiang Tong,Duncan MacCannell, |
| EPI_ISL_888860, EPI_ISL_888861                                                                                                                                                                                                                 | Michigan Department of Health and Human Services, Bureau of Laboratories                       | Michigan Department of Health and Human Services, Bureau of Laboratories                                               | Blankenship HM, Riner D, Soehnlén MK                                                                                                                                                                                                                                                                                                                                                                                                                                                                                                                                                                                                                                                                                                                |                                                                                                                                                                                                                                                                                                                                                                                                                                                                                                                                                                                                                                                                                                                                                                                                                                                    |
| EPI_ISL_888927, EPI_ISL_888947, EPI_ISL_888970                                                                                                                                                                                                 | Wyoming Public Health Laboratory                                                               | Wyoming Public Health Laboratory                                                                                       | Noah Hull, Taylor Fearing, Lynette Gumbleton, Channing Weber, Ashley Norberg, Bailey Bowcutt, and Wanda Manley                                                                                                                                                                                                                                                                                                                                                                                                                                                                                                                                                                                                                                      |                                                                                                                                                                                                                                                                                                                                                                                                                                                                                                                                                                                                                                                                                                                                                                                                                                                    |
| EPI_ISL_889061, EPI_ISL_889070                                                                                                                                                                                                                 | Israel Central Virology laboratory                                                             | Israel National Consortium for SARS-CoV-2 sequencing                                                                   | Neta Zuckerman, Efrat Dahan Bucris, Michal Mandelboim, Dana Bar-Ilan, Oran Erster, Tzvia Mann, Omer Murik, David A. Zeevi, Assaf Rokney, Joseph Jaffe, Eva Nachum, Maya Davidovich Cohen, Ephraim Fass, Gal Zizelski Valenci, Mor Rubinstein, Efrat Rorman, Israel Nissan, Efrat Glick-Saar, Omri Nayshool, Gideon Rechavi, Ella Mendelson, Orna Mor                                                                                                                                                                                                                                                                                                                                                                                                |                                                                                                                                                                                                                                                                                                                                                                                                                                                                                                                                                                                                                                                                                                                                                                                                                                                    |
| EPI_ISL_889480, EPI_ISL_889482, EPI_ISL_889551, EPI_ISL_889653                                                                                                                                                                                 | LSUHS Emerging Viral Threat Laboratory                                                         | Microbial Genome Sequencing Center                                                                                     | Jeremy P. Kamil, Jennifer L. Carroll, Camille F. Abshire, Maarten Van Diest, Mohammed N.A. Siddiquey, Andrew D. Yurochko, Martin J. Sapp, Rona S. Scott, Christopher G. Kevil, Daniel J. Snyder, Vaughn S. Cooper, John A. Vanchiere                                                                                                                                                                                                                                                                                                                                                                                                                                                                                                                |                                                                                                                                                                                                                                                                                                                                                                                                                                                                                                                                                                                                                                                                                                                                                                                                                                                    |
| EPI_ISL_890133, EPI_ISL_890145, EPI_ISL_890158                                                                                                                                                                                                 | Laboratoire de santé publique du Québec                                                        | Laboratoire de santé publique du Québec                                                                                | Sandrine Moreira, Ioannis Ragoussis, Guillaume Bourque, Jesse Shapiro, Mark Lathrop and Michel Roger on behalf of the CoVSeQ research group                                                                                                                                                                                                                                                                                                                                                                                                                                                                                                                                                                                                         |                                                                                                                                                                                                                                                                                                                                                                                                                                                                                                                                                                                                                                                                                                                                                                                                                                                    |
| EPI_ISL_890192, EPI_ISL_890193                                                                                                                                                                                                                 | Gonoshasthaya-RNA Research Center, Gonoshasthaya-RNA Molecular Diagnostics and Research Center | Gonoshasthaya-RNA Research Center, Gonoshasthaya-RNA Molecular Diagnostics and Research Center                         | Jamiruddin,M.R., Khondoker,M.U., Sharif,N., Azmuda,N., Ahmed,M.F., Sharmin,S., Akter,S., Mou,T.J., Marzan,M., Liza,S.M., Nahar,S., Jahan,N., Ali,T., Khandker,S.S., Jamiruddin,M., Haq,M.A., Adnan,N., Chaity,M., Oisheh,M.                                                                                                                                                                                                                                                                                                                                                                                                                                                                                                                         |                                                                                                                                                                                                                                                                                                                                                                                                                                                                                                                                                                                                                                                                                                                                                                                                                                                    |
| EPI_ISL_891125, EPI_ISL_891135                                                                                                                                                                                                                 | Altius Institute for Biomedical Sciences                                                       | Seattle Flu Study                                                                                                      | Deborah A. Nickerson, Chris D. Frazer, Jover Lee, Benjamin Pelle, Erica Ryke, Matthew Richardson, Amanda Adler, Elisabeth Brandstetter, Peter D. Han, Kairsten Fay, Misja Ilicisin, Kirsten Lacombe, Thomas R. Sibley, Melissa Truong, Caitlin R. Wolf, Ryan Alexander, Daniel Bates, Rebecca Bruders, Stephanie DeBaun, Clem Green, Muhammad Halimun, Kneshay Harper, Matt Hartman, Andrew Meuser, Alex Nguyen, Truong Nguyen, Sofia Olsson, Sadie Patraw, Hannah Petersen, Tobias Ragoczy, Joshua Richards, Jacob Rodriguez, John Stamatoyannopoulos, Julia Wald, Olivia Waltner, Michael Boeckh, Janet A. Englund, Michael Famulare, Barry R. Lutz, Mark J. Rieder, Lea M. Starita, Matthew Thompson, Helen Y. Chu, Jay Shendure, Trevor Bedford |                                                                                                                                                                                                                                                                                                                                                                                                                                                                                                                                                                                                                                                                                                                                                                                                                                                    |
| EPI_ISL_893734                                                                                                                                                                                                                                 | Pima County Health Department                                                                  | Pathogen Discovery, Respiratory Viruses Branch, Division of Viral Diseases, Centers for Disease Control and Prevention | Yan Li, Anna Montmayeur, Ying Tao, Jing Zhang, Krista Queen, Anna Uehara, Brian Lynch, Rachel Marine, Peter Cook, Clinton R. Paden, Haibin Wang, Suxiang Tong                                                                                                                                                                                                                                                                                                                                                                                                                                                                                                                                                                                       |                                                                                                                                                                                                                                                                                                                                                                                                                                                                                                                                                                                                                                                                                                                                                                                                                                                    |
| EPI_ISL_894230                                                                                                                                                                                                                                 | CH de Mayotte - Laboratoire de Biologie                                                        | National Reference Center for Viruses of Respiratory Infections, Institut Pasteur, Paris                               | Marion Barbet, Sylvie Behillil, Méline Bizard, Angela Brisebarre, Camille Capel, Etienne Simon-Lorière, Vincent Enouf, Maud Vanpeene, Sylvie van der Werf,Combe Patrice                                                                                                                                                                                                                                                                                                                                                                                                                                                                                                                                                                             |                                                                                                                                                                                                                                                                                                                                                                                                                                                                                                                                                                                                                                                                                                                                                                                                                                                    |
| EPI_ISL_896242, EPI_ISL_896243                                                                                                                                                                                                                 | Columbia University Irving Medical Center                                                      | Wadsworth Center, New York State Department of Health                                                                  | Kirsten St. George, Daryl M. Lamson, Alexis Russel, Matthew Shudt, Melissa A Leisner, Jonathan Plitnick, Navjot Singh, John Kelly, Erasmus Schneider, Erica Lasek-Nesselquist                                                                                                                                                                                                                                                                                                                                                                                                                                                                                                                                                                       |                                                                                                                                                                                                                                                                                                                                                                                                                                                                                                                                                                                                                                                                                                                                                                                                                                                    |
| EPI_ISL_896284, EPI_ISL_896286                                                                                                                                                                                                                 | SUNY UPSTATE MEDICAL UNIVERSITY                                                                | Wadsworth Center, New York State Department of Health                                                                  | Kirsten St. George, Daryl M. Lamson, Alexis Russel, Matthew Shudt, Melissa A Leisner, Jonathan Plitnick, Navjot Singh, John Kelly, Erasmus Schneider, Erica Lasek-Nesselquist                                                                                                                                                                                                                                                                                                                                                                                                                                                                                                                                                                       |                                                                                                                                                                                                                                                                                                                                                                                                                                                                                                                                                                                                                                                                                                                                                                                                                                                    |

|                                                                                                                                                                                |                                                                                                                |                                                                                                                            |                                                                                                                                                                                                                                                                                                                                                                                                                      |
|--------------------------------------------------------------------------------------------------------------------------------------------------------------------------------|----------------------------------------------------------------------------------------------------------------|----------------------------------------------------------------------------------------------------------------------------|----------------------------------------------------------------------------------------------------------------------------------------------------------------------------------------------------------------------------------------------------------------------------------------------------------------------------------------------------------------------------------------------------------------------|
| EPI_ISL_896305, EPI_ISL_896306                                                                                                                                                 | New York Presbyterian Hospital                                                                                 | Wadsworth Center, New York State Department of Health                                                                      | Kirsten St. George, Daryl M. Lamson, Alexis Russel, Matthew Shudt, Melissa A Leisner, Jonathan Plitnick, Navjot Singh, John Kelly, Erasmus Schneider, Erica Lasek-Nesselquist                                                                                                                                                                                                                                        |
| EPI_ISL_896315, EPI_ISL_896317, EPI_ISL_896318, EPI_ISL_896319, EPI_ISL_896321, EPI_ISL_896324, EPI_ISL_896329, EPI_ISL_896331, EPI_ISL_896343, EPI_ISL_896344, EPI_ISL_896345 | see above                                                                                                      | MEMORIAL SLOAN KETTERING CANCER CENTER                                                                                     | Wadsworth Center, New York State Department of Health                                                                                                                                                                                                                                                                                                                                                                |
| EPI_ISL_896350, EPI_ISL_896358, EPI_ISL_896361, EPI_ISL_896362, EPI_ISL_896366                                                                                                 | New York Presbyterian Hospital                                                                                 | Wadsworth Center, New York State Department of Health                                                                      | Kirsten St. George, Daryl M. Lamson, Alexis Russel, Matthew Shudt, Melissa A Leisner, Jonathan Plitnick, Navjot Singh, John Kelly, Erasmus Schneider, Erica Lasek-Nesselquist                                                                                                                                                                                                                                        |
| EPI_ISL_896382, EPI_ISL_896389, EPI_ISL_896391                                                                                                                                 | Columbia University Irving Medical Center                                                                      | Wadsworth Center, New York State Department of Health                                                                      | Kirsten St. George, Daryl M. Lamson, Alexis Russel, Matthew Shudt, Melissa A Leisner, Jonathan Plitnick, Navjot Singh, John Kelly, Erasmus Schneider, Erica Lasek-Nesselquist                                                                                                                                                                                                                                        |
| EPI_ISL_896412, EPI_ISL_896417, EPI_ISL_896419                                                                                                                                 | URMC LABS                                                                                                      | Wadsworth Center, New York State Department of Health                                                                      | Kirsten St. George, Daryl M. Lamson, Alexis Russel, Matthew Shudt, Melissa A Leisner, Jonathan Plitnick, Navjot Singh, John Kelly, Erasmus Schneider, Erica Lasek-Nesselquist                                                                                                                                                                                                                                        |
| EPI_ISL_896424, EPI_ISL_896435                                                                                                                                                 | Columbia University Irving Medical Center                                                                      | Wadsworth Center, New York State Department of Health                                                                      | Kirsten St. George, Daryl M. Lamson, Alexis Russel, Matthew Shudt, Melissa A Leisner, Jonathan Plitnick, Navjot Singh, John Kelly, Erasmus Schneider, Erica Lasek-Nesselquist                                                                                                                                                                                                                                        |
| EPI_ISL_896499, EPI_ISL_896500                                                                                                                                                 | MEMORIAL SLOAN KETTERING CANCER CENTER                                                                         | Wadsworth Center, New York State Department of Health                                                                      | Kirsten St. George, Daryl M. Lamson, Alexis Russel, Matthew Shudt, Melissa A Leisner, Jonathan Plitnick, Navjot Singh, John Kelly, Erasmus Schneider, Erica Lasek-Nesselquist                                                                                                                                                                                                                                        |
| EPI_ISL_896508                                                                                                                                                                 | URMC LABS                                                                                                      | Wadsworth Center, New York State Department of Health                                                                      | Kirsten St. George, Daryl M. Lamson, Alexis Russel, Matthew Shudt, Melissa A Leisner, Jonathan Plitnick, Navjot Singh, John Kelly, Erasmus Schneider, Erica Lasek-Nesselquist                                                                                                                                                                                                                                        |
| EPI_ISL_896534                                                                                                                                                                 | New York Presbyterian Hospital                                                                                 | Wadsworth Center, New York State Department of Health                                                                      | Kirsten St. George, Daryl M. Lamson, Alexis Russel, Matthew Shudt, Melissa A Leisner, Jonathan Plitnick, Navjot Singh, John Kelly, Erasmus Schneider, Erica Lasek-Nesselquist                                                                                                                                                                                                                                        |
| EPI_ISL_896547, EPI_ISL_896548, EPI_ISL_896552                                                                                                                                 | MEMORIAL SLOAN KETTERING CANCER CENTER                                                                         | Wadsworth Center, New York State Department of Health                                                                      | Kirsten St. George, Daryl M. Lamson, Alexis Russel, Matthew Shudt, Melissa A Leisner, Jonathan Plitnick, Navjot Singh, John Kelly, Erasmus Schneider, Erica Lasek-Nesselquist                                                                                                                                                                                                                                        |
| EPI_ISL_896556, EPI_ISL_896557                                                                                                                                                 | New York Presbyterian Hospital                                                                                 | Wadsworth Center, New York State Department of Health                                                                      | Kirsten St. George, Daryl M. Lamson, Alexis Russel, Matthew Shudt, Melissa A Leisner, Jonathan Plitnick, Navjot Singh, John Kelly, Erasmus Schneider, Erica Lasek-Nesselquist                                                                                                                                                                                                                                        |
| EPI_ISL_899061, EPI_ISL_899362                                                                                                                                                 | Viollier AG                                                                                                    | Department of Biosystems Science and Engineering, ETH Zürich                                                               | Chaoran Chen, Sarah Nadeau, Ivan Topolsky, Emmanouil Dermizakis, Keith Harshman, Ioannis Xenarios, Henri Pegeot, Lorenzo Cerutti, Deborah Penet, Philipp Jablonski, Lara Fuhrmann, David Drefuss, Katharina Jahn, Christiane Beckmann, Maurice Redondo, Olivier Kobel, Christoph Noppen, Sophie Seidel, Noemie Santamaria de Souza, Niko Beerenwinkel, Tanja Stadler                                                 |
| EPI_ISL_902858                                                                                                                                                                 | Department of Virology and Immunology, University of Helsinki and Helsinki University Hospital, Huslab Finland | Department of Virology, Faculty of Medicine, University of Helsinki, Helsinki, Finland                                     | Teemu Smura, Ravi Kant, Phuoc Truong, Hussein Alburkat, Hannimari Kallio-Kokko, Jenni Virtanen, Majja Suvanto, Essi Korhonen, Sari Hannula, Harri Kangas, Hanna Liimatainen, Satu Kurkela, Hanna Jarva, Maija Lappalainen, Pekka Ellonen, Olli Vapalahti                                                                                                                                                             |
| EPI_ISL_902925                                                                                                                                                                 | MD Laboratories                                                                                                | Los Angeles County PHL                                                                                                     | P. Hemarajata et al.                                                                                                                                                                                                                                                                                                                                                                                                 |
| EPI_ISL_903065                                                                                                                                                                 | Seattle Flu Study                                                                                              | Seattle Flu Study                                                                                                          | Deborah A. Nickerson, Chris D. Frazar, Jover Lee, Benjamin Pelle, Erica Ryke, Matthew Richardson, Amanda Adler, Elisabeth Brandstetter, Peter D. Han, Kaiستن Fay, Misja Ilicsin, Kirsten Lacombe, Thomas R. Sibley, Melissa Truong, Caitlin R. Wolf, Michael Boeckh, Janet A. Englund, Michael Famulare, Barry R. Lutz, Mark J. Rieder, Lea M. Starita, Matthew Thompson, Jay Shendure, Trevor Bedford, Helen Y. Chu |
| EPI_ISL_903294                                                                                                                                                                 | M Health Fairview                                                                                              | Minnesota Department of Health, Public Health Laboratory                                                                   | Alexandra Lorentz, Jacob Garfin, Matt Plumb, and Xiong Wang                                                                                                                                                                                                                                                                                                                                                          |
| EPI_ISL_903407, EPI_ISL_903464, EPI_ISL_903474, EPI_ISL_903535                                                                                                                 | Quest Diagnostics                                                                                              | Quest Diagnostics                                                                                                          | Rosenthal,S.H., Gerasimova,A., Kagan,R.M., Anderson, B., Hua, M., Liu Y., Bernstein, L.E., Livingston, K.E., Perez, A., Shalhout, D.F., Shlyakhter, I.A., Owen, R., Tanpaiboon, P., Lacbawan, F.                                                                                                                                                                                                                     |
| EPI_ISL_903565                                                                                                                                                                 | AR Dept. of Health-Public Health Lab                                                                           | Genomics and Discovery, Respiratory Viruses Branch, Division of Viral Diseases, Centers for Disease Control and Prevention | Krista Queen, Yan Li, Ying Tao, Jing Zhang, Anna Uehara, Anna Montmayeur, Clinton R. Paden, Peter W. Cook, Rachel Marine, Mili Sheth, Jasmine Padilla, Sarah Nobles, Mark Burroughs, Lori Rowe, Haibin Wang, Ben L. Rambo-Martin, Dhvani Batra, Justin Lee, Suxiang Tong                                                                                                                                             |
| EPI_ISL_903662                                                                                                                                                                 | PA Department of Health, Bureau of Laboratories                                                                | Genomics and Discovery, Respiratory Viruses Branch, Division of Viral Diseases, Centers for Disease Control and Prevention | Krista Queen, Yan Li, Ying Tao, Jing Zhang, Anna Uehara, Anna Montmayeur, Clinton R. Paden, Peter W. Cook, Rachel Marine, Mili Sheth, Jasmine Padilla, Sarah Nobles, Mark Burroughs, Lori Rowe, Haibin Wang, Ben L. Rambo-Martin, Dhvani Batra, Justin Lee, Suxiang Tong                                                                                                                                             |
| EPI_ISL_903697                                                                                                                                                                 | AR Dept. of Health-Public Health Lab                                                                           | Genomics and Discovery, Respiratory Viruses Branch, Division of Viral Diseases, Centers for Disease Control and Prevention | Krista Queen, Yan Li, Ying Tao, Jing Zhang, Anna Uehara, Anna Montmayeur, Clinton R. Paden, Peter W. Cook, Rachel Marine, Mili Sheth, Jasmine Padilla, Sarah Nobles, Mark Burroughs, Lori Rowe, Haibin Wang, Ben L. Rambo-Martin, Dhvani Batra, Justin Lee, Suxiang Tong                                                                                                                                             |
| EPI_ISL_903777                                                                                                                                                                 | NC State Laboratory of Public Health                                                                           | Genomics and Discovery, Respiratory Viruses Branch, Division of Viral Diseases, Centers for Disease Control and Prevention | Krista Queen, Yan Li, Ying Tao, Jing Zhang, Anna Uehara, Anna Montmayeur, Clinton R. Paden, Peter W. Cook, Rachel Marine, Mili Sheth, Jasmine Padilla, Sarah Nobles, Mark Burroughs, Lori Rowe, Haibin Wang, Ben L. Rambo-Martin, Dhvani Batra, Justin Lee, Suxiang Tong                                                                                                                                             |
| EPI_ISL_903880                                                                                                                                                                 | NH Dept. of Health and Human Services Public Health Labs                                                       | Genomics and Discovery, Respiratory Viruses Branch, Division of Viral Diseases, Centers for Disease Control and Prevention | Krista Queen, Yan Li, Ying Tao, Jing Zhang, Anna Uehara, Anna Montmayeur, Clinton R. Paden, Peter W. Cook, Rachel Marine, Mili Sheth, Jasmine Padilla, Sarah Nobles, Mark Burroughs, Lori Rowe, Haibin Wang, Ben L. Rambo-Martin, Dhvani Batra, Justin Lee, Suxiang Tong                                                                                                                                             |
| EPI_ISL_903912                                                                                                                                                                 | TN Division of Laboratory Services                                                                             | Genomics and Discovery, Respiratory Viruses Branch, Division of Viral Diseases, Centers for Disease Control and Prevention | Krista Queen, Yan Li, Ying Tao, Jing Zhang, Anna Uehara, Anna Montmayeur, Clinton R. Paden, Peter W. Cook, Rachel Marine, Mili Sheth, Jasmine Padilla, Sarah Nobles, Mark Burroughs, Lori Rowe, Haibin Wang, Ben L. Rambo-Martin, Dhvani Batra, Justin Lee, Suxiang Tong                                                                                                                                             |
| EPI_ISL_903933                                                                                                                                                                 | PA Department of Health, Bureau of Laboratories                                                                | Genomics and Discovery, Respiratory Viruses Branch, Division of Viral Diseases, Centers for Disease Control and Prevention | Krista Queen, Yan Li, Ying Tao, Jing Zhang, Anna Uehara, Anna Montmayeur, Clinton R. Paden, Peter W. Cook, Rachel Marine, Mili Sheth, Jasmine Padilla, Sarah Nobles, Mark Burroughs, Lori Rowe, Haibin Wang, Ben L. Rambo-Martin, Dhvani Batra, Justin Lee, Suxiang Tong                                                                                                                                             |
| EPI_ISL_904082, EPI_ISL_904112                                                                                                                                                 | New Mexico Department of Health Scientific Laboratory                                                          | New Mexico Department of Health Scientific Laboratory                                                                      | Ellie Johnson, Anastacia Griego-Fisher, D'eltra Malone                                                                                                                                                                                                                                                                                                                                                               |
| EPI_ISL_905788                                                                                                                                                                 | UCLA Clinical Micro Lab                                                                                        | Los Angeles County PHL                                                                                                     | P. Hemarajata et al.                                                                                                                                                                                                                                                                                                                                                                                                 |
| EPI_ISL_905870, EPI_ISL_905874, EPI_ISL_905925, EPI_ISL_905930, EPI_ISL_905969                                                                                                 | OHSU Lab Services Molecular Microbiology Lab                                                                   | Oregon SARS-CoV-2 Genome Sequencing Center                                                                                 | Brendan L. O'Connell, Sally Grindstaff, Kayla Carter, Ruth V. Nichols, Alec J. Hirsch, Donna Hansel, Guang Fan, Xuan, Qin, Daniel N. Streblov, William B. Messer, Andrew C. Adey, Benjamin N. Bimber, Brian J. O'Roak                                                                                                                                                                                                |
| EPI_ISL_906073                                                                                                                                                                 | Hospital Vila Lobos                                                                                            | Instituto Adolfo Lutz, Interdisciplinary Procedures Center, Strategic Laboratory                                           | Claudio Tavares Sacchi, Claudia Regina Gonçalves, Erica Valessa Ramos Gomes, Karoline Rodrigues Campos                                                                                                                                                                                                                                                                                                               |
| EPI_ISL_906078                                                                                                                                                                 | Hospital Carlos Chagas                                                                                         | Instituto Adolfo Lutz, Interdisciplinary Procedures Center, Strategic Laboratory                                           | Claudio Tavares Sacchi, Claudia Regina Gonçalves, Erica Valessa Ramos Gomes, Karoline Rodrigues Campos                                                                                                                                                                                                                                                                                                               |
| EPI_ISL_906277                                                                                                                                                                 | Nigeria Centre for Disease Control (NCDC)                                                                      | African Centre of Excellence for Genomics of Infectious Diseases (ACEGID), Redeemer's University                           | Oluniyi P.E. et al                                                                                                                                                                                                                                                                                                                                                                                                   |
| EPI_ISL_906311, EPI_ISL_906408, EPI_ISL_906426, EPI_ISL_906449                                                                                                                 | Quest Diagnostics                                                                                              | Quest Diagnostics                                                                                                          | Rosenthal,S.H., Gerasimova,A., Kagan,R.M., Anderson, B., Hua, M., Liu Y., Bernstein, L.E., Livingston, K.E., Perez, A., Shalhout, D.F., Shlyakhter, I.A., Owen, R., Tanpaiboon, P., Lacbawan, F.                                                                                                                                                                                                                     |
| EPI_ISL_906531                                                                                                                                                                 | Laboratorio de salud publica del Valle del Cauca                                                               | Instituto Nacional de Salud- Dirección de Investigación en Salud Pública, Universidad de los Andes- Applied genomics       | Katherine Laiton-Donato, Diego A. Álvarez-Díaz, Carlos Franco-Muñoz, Mauricio Pacheco-Montealegre, Héctor Alejandro Ruiz-Moreno, María T. Herrera-Sepúlveda, Diego Andrés Prada, Jhonnatan Reales-González, Sheryll Corchuelo, Julian Naizaque, Gerardo Santamaria Jorge Duitama, Laura                                                                                                                              |

|                                                                |                                                                                                                                                                                                                                                                                                                                                                                                                                                                                               |                                                                                                                                                                        |                                                                                                                                                                                                                                                                                                                                                                                                                                                                                                                                                                                                                                                                                                                                                                                                                                                             |
|----------------------------------------------------------------|-----------------------------------------------------------------------------------------------------------------------------------------------------------------------------------------------------------------------------------------------------------------------------------------------------------------------------------------------------------------------------------------------------------------------------------------------------------------------------------------------|------------------------------------------------------------------------------------------------------------------------------------------------------------------------|-------------------------------------------------------------------------------------------------------------------------------------------------------------------------------------------------------------------------------------------------------------------------------------------------------------------------------------------------------------------------------------------------------------------------------------------------------------------------------------------------------------------------------------------------------------------------------------------------------------------------------------------------------------------------------------------------------------------------------------------------------------------------------------------------------------------------------------------------------------|
|                                                                |                                                                                                                                                                                                                                                                                                                                                                                                                                                                                               | research group, Vicerrectoria de Investigación y Creación, Universidad de los Andes- Systems and Computing Engineering Department                                      | Natalia Gonzalez, Jorge Ivan Diaz, Silvia Restrepo-Restrepo, Magdalena Wiesner, Martha Lucia Ospina Martinez, Marcela Mercado-Reyes                                                                                                                                                                                                                                                                                                                                                                                                                                                                                                                                                                                                                                                                                                                         |
| EPI_ISL_909390                                                 | Lighthouse Lab in Glasgow                                                                                                                                                                                                                                                                                                                                                                                                                                                                     | Wellcome Sanger Institute for the COVID-19 Genomics UK (COG-UK) Consortium                                                                                             | Harper VanSteenhouse, Yumi Kasai, David Gray, Carol Clugston, Anna Dominiczak and Alex Alderton, Roberto Amato, Sonia Goncalves, Ewan Harrison, David K. Jackson, Ian Johnston, Dominic Kwiatkowski, Cordelia Langford, John Sillitoe on behalf of the Wellcome Sanger Institute COVID-19 Surveillance Team                                                                                                                                                                                                                                                                                                                                                                                                                                                                                                                                                 |
| EPI_ISL_910205, EPI_ISL_910211                                 | CSIR-Centre for Cellular and Molecular Biology                                                                                                                                                                                                                                                                                                                                                                                                                                                | CSIR-Centre for Cellular and Molecular Biology                                                                                                                         | Payel Mukherjee, Pratheusa Maccha, Namami Gaur, Lamuk Zaveri, Tulasi Nagabandi, Purushotham Vodnala, Blessy B John, Viswagithe S L, B Himasri, Sofia Banu, Priya Singh, Archana Bharadwaj Siva, Karthik Bharadwaj Tallapaka, Rakesh K Mishra, Divya Tej Sowpati                                                                                                                                                                                                                                                                                                                                                                                                                                                                                                                                                                                             |
| EPI_ISL_911245                                                 | National Virus Reference Laboratory                                                                                                                                                                                                                                                                                                                                                                                                                                                           | National Virus Reference Laboratory                                                                                                                                    | Michael Carr, Gabriel Gonzalez, Jonathan Dean, Cillian F De Gascun                                                                                                                                                                                                                                                                                                                                                                                                                                                                                                                                                                                                                                                                                                                                                                                          |
| EPI_ISL_911415, EPI_ISL_911617                                 | Clinical Diagnostics Laboratory, Diagnostic & Experimental Pathology, Lilly Research Laboratories                                                                                                                                                                                                                                                                                                                                                                                             | Clinical Diagnostics Laboratory, Diagnostic & Experimental Pathology, Lilly Research Laboratories                                                                      | Tim Holzer, Mayuri Vaidya, Angie Fulford, Sam McNeely, Rachael Redmond, Phil Ebert, John Colley, Leslie O'Neill Reising, Pat Finnegan, Erin Wray, John McElwee, Jeff Fitt, Joe Oakley, Andrew Schade                                                                                                                                                                                                                                                                                                                                                                                                                                                                                                                                                                                                                                                        |
| EPI_ISL_911633                                                 | Tanjungpura University Hospital                                                                                                                                                                                                                                                                                                                                                                                                                                                               | Tanjungpura University Hospital                                                                                                                                        | Mahyarudin; Andriani; Virhan Novianry; Delima Fajar Liana ; Sofi Siti Shofiyah; Puji Astuti ; Muhammad Ibnu Kahtan ; Ambar Rialita; Eka Ardiani Putri; Wiwik Windarti; Helmi Sastrawan                                                                                                                                                                                                                                                                                                                                                                                                                                                                                                                                                                                                                                                                      |
| EPI_ISL_911879, EPI_ISL_911880, EPI_ISL_911883                 | Johns Hopkins Hospital Department of Pathology                                                                                                                                                                                                                                                                                                                                                                                                                                                | Johns Hopkins Hospital Department of Pathology                                                                                                                         | C. Paul Morris, Chun Huai Luo, Adannaya Amadi, Matthew Schwartz, Nicholas Gallagher, Heba H. Mostafa                                                                                                                                                                                                                                                                                                                                                                                                                                                                                                                                                                                                                                                                                                                                                        |
| EPI_ISL_911932, EPI_ISL_911959                                 | Wyoming Public Health Laboratory                                                                                                                                                                                                                                                                                                                                                                                                                                                              | Wyoming Public Health Laboratory                                                                                                                                       | Noah Hull, Taylor Fearing, Lynette Gumbleton, Channing Weber, Ashley Norberg, Bailey Bowcutt, and Wanda Manley                                                                                                                                                                                                                                                                                                                                                                                                                                                                                                                                                                                                                                                                                                                                              |
| EPI_ISL_911992, EPI_ISL_912000, EPI_ISL_912003, EPI_ISL_912010 | Altius Institute for Biomedical Sciences                                                                                                                                                                                                                                                                                                                                                                                                                                                      | Seattle Flu Study                                                                                                                                                      | Deborah A. Nickerson, Chris D. Frazar, Jover Lee, Benjamin Pelle, Erica Ryke, Matthew Richardson, Amanda Adler, Elisabeth Brandstetter, Peter D. Han, Kairsten Fay, Misja Ilcin, Kirsten Lacombe, Thomas R. Sibley, Melissa Truong, Caitlin R. Wolf, Ryan Alexander, Daniel Bates, Rebecca Bruders, Stephanie DeBaun, Clem Green, Muhammad Halimun, Jessica Halow, Kneshay Harper, Matt Hartman, Andrew Meuser, Alex Nguyen, Truong Nguyen, Sofia Olsson, Sadie Patraw, Hannah Petersen, Tobias Ragoczy, Joshua Richards, Jacob Rodriguez, John Stamatoyannopoulos, Julia Wald, Olivia Waltner, Michael Boeckh, Janet A. Englund, Michael Famulare, Barry R. Lutz, Mark J. Rieder, Lea M. Starita, Matthew Thompson, Helen Y. Chu, Jay Shendure, Trevor Bedford                                                                                             |
| EPI_ISL_912086, EPI_ISL_912088, EPI_ISL_912091                 | Washington State Department of Health                                                                                                                                                                                                                                                                                                                                                                                                                                                         | Seattle Flu Study                                                                                                                                                      | Deborah A. Nickerson, Chris D. Frazar, Jover Lee, Benjamin Pelle, Erica Ryke, Matthew Richardson, Amanda Adler, Elisabeth Brandstetter, Peter D. Han, Kairsten Fay, Misja Ilcin, Kirsten Lacombe, Thomas R. Sibley, Melissa Truong, Caitlin R. Wolf, Romesh Gautom, Geoff Melly, Brian Hiatt, Philip Dykema, Scott Lindquist, Michael Boeckh, Janet A. Englund, Michael Famulare, Barry R. Lutz, Mark J. Rieder, Lea M. Starita, Matthew Thompson, Helen Y. Chu, Jay Shendure, Trevor Bedford                                                                                                                                                                                                                                                                                                                                                               |
| EPI_ISL_912119                                                 | Altius Institute for Biomedical Sciences                                                                                                                                                                                                                                                                                                                                                                                                                                                      | Seattle Flu Study                                                                                                                                                      | Deborah A. Nickerson, Chris D. Frazar, Jover Lee, Benjamin Pelle, Erica Ryke, Matthew Richardson, Amanda Adler, Elisabeth Brandstetter, Peter D. Han, Kairsten Fay, Misja Ilcin, Kirsten Lacombe, Thomas R. Sibley, Melissa Truong, Caitlin R. Wolf, Ryan Alexander, Daniel Bates, Rebecca Bruders, Stephanie DeBaun, Clem Green, Muhammad Halimun, Jessica Halow, Kneshay Harper, Matt Hartman, Andrew Meuser, Alex Nguyen, Truong Nguyen, Sofia Olsson, Sadie Patraw, Hannah Petersen, Tobias Ragoczy, Joshua Richards, Jacob Rodriguez, John Stamatoyannopoulos, Julia Wald, Olivia Waltner, Michael Boeckh, Janet A. Englund, Michael Famulare, Barry R. Lutz, Mark J. Rieder, Lea M. Starita, Matthew Thompson, Helen Y. Chu, Jay Shendure, Trevor Bedford                                                                                             |
| EPI_ISL_912354, EPI_ISL_912367, EPI_ISL_912394                 | Fondation Congolaise pour la recherche medicale (FCRM), Francine Ntoumi                                                                                                                                                                                                                                                                                                                                                                                                                       | NGS Competence Center Tuebingen, Institut für Medizinische Mikrobiologie und Hygiene, Universitätsklinikum Tübingen                                                    | Angel Angelov                                                                                                                                                                                                                                                                                                                                                                                                                                                                                                                                                                                                                                                                                                                                                                                                                                               |
| EPI_ISL_912517                                                 | NHLS Universitas Academic                                                                                                                                                                                                                                                                                                                                                                                                                                                                     | UFS Virology                                                                                                                                                           | PA Bester, MM Nyaga, P Nthiga, MT Mogotsi, D Goedhals, T de Oliveira                                                                                                                                                                                                                                                                                                                                                                                                                                                                                                                                                                                                                                                                                                                                                                                        |
| EPI_ISL_913266                                                 | Unilabs AB Skovde                                                                                                                                                                                                                                                                                                                                                                                                                                                                             | The Public Health Agency of Sweden                                                                                                                                     | Anna-Malin Linde, Maria Lind Karlberg, Carlo Berg, Oskar Karlsson Lindsjo, Sofia Stamouli, Reza Advani, Mattias Haukland, Petra Holmstrom, Noura Walai, Petra Edquist, Mia Brytting, Anna Risberg, Karin Tegmark-Wisell                                                                                                                                                                                                                                                                                                                                                                                                                                                                                                                                                                                                                                     |
| EPI_ISL_913269, EPI_ISL_913365                                 | Klinisk mikrobiologi                                                                                                                                                                                                                                                                                                                                                                                                                                                                          | The Public Health Agency of Sweden                                                                                                                                     | Anna-Malin Linde, Maria Lind Karlberg, Carlo Berg, Oskar Karlsson Lindsjo, Sofia Stamouli, Reza Advani, Mattias Haukland, Petra Holmstrom, Noura Walai, Petra Edquist, Mia Brytting, Anna Risberg, Karin Tegmark-Wisell                                                                                                                                                                                                                                                                                                                                                                                                                                                                                                                                                                                                                                     |
| EPI_ISL_913433                                                 | Massachusetts State Public Health Laboratory                                                                                                                                                                                                                                                                                                                                                                                                                                                  | Massachusetts State Public Health Laboratory                                                                                                                           | Andrew Lang, Timelia Fink, Glen Gallagher, Sandra Smole                                                                                                                                                                                                                                                                                                                                                                                                                                                                                                                                                                                                                                                                                                                                                                                                     |
| EPI_ISL_913450, EPI_ISL_913455                                 | Unilabs AB Skovde                                                                                                                                                                                                                                                                                                                                                                                                                                                                             | The Public Health Agency of Sweden                                                                                                                                     | Anna-Malin Linde, Maria Lind Karlberg, Carlo Berg, Oskar Karlsson Lindsjo, Sofia Stamouli, Reza Advani, Mattias Haukland, Petra Holmstrom, Noura Walai, Petra Edquist, Mia Brytting, Anna Risberg, Karin Tegmark-Wisell                                                                                                                                                                                                                                                                                                                                                                                                                                                                                                                                                                                                                                     |
| EPI_ISL_913835                                                 | KU Leuven, Rega Institute, Clinical and Epidemiological Virology                                                                                                                                                                                                                                                                                                                                                                                                                              | KU Leuven, Rega Institute, Clinical and Epidemiological Virology                                                                                                       | Tony Wawina-Bokalanga, Bert Vanmechelen, Joan Marti-Carerras, Piet Maes                                                                                                                                                                                                                                                                                                                                                                                                                                                                                                                                                                                                                                                                                                                                                                                     |
| EPI_ISL_913904                                                 | TGen North                                                                                                                                                                                                                                                                                                                                                                                                                                                                                    | TGen North                                                                                                                                                             | *Jolene Bowers, Megan Folkerts, Chris French, Hayley Yaglom, Ashlyn Pfeiffer, Darrin Lemmer, Dave Engelthaler, The Arizona COVID Genomics Union (ACGU)*                                                                                                                                                                                                                                                                                                                                                                                                                                                                                                                                                                                                                                                                                                     |
| EPI_ISL_913949                                                 | Instituto de Diagnostico y Referencia Epidemiologicos INDRE_RNLSP                                                                                                                                                                                                                                                                                                                                                                                                                             | Instituto de Diagnostico y Referencia Epidemiologicos (INDRE)                                                                                                          | Claudia Wong-Arambula, Abril Rodriguez-Maldonado, Fabiola Garces-Ayala, Adnan Araiza-Rodriguez, David Fragoso-Fonseca, Sergio Rangel-Guerrero, Mayra Jimenez-Morales, Nancy Munoz-Hernandez, Natividad Cruz-Ortiz, Tatiana Nunez-Garcia, Gisela Barrera-Badillo, Lucia Hernandez-Rivas, Irma Lopez-Martinez, Ernesto Ramirez-Gonzalez.                                                                                                                                                                                                                                                                                                                                                                                                                                                                                                                      |
| EPI_ISL_914737                                                 | Wyoming Public Health Laboratory                                                                                                                                                                                                                                                                                                                                                                                                                                                              | Wyoming Public Health Laboratory                                                                                                                                       | Noah Hull, Taylor Fearing, Lynette Gumbleton, Channing Weber, Ashley Norberg, Bailey Bowcutt, and Wanda Manley                                                                                                                                                                                                                                                                                                                                                                                                                                                                                                                                                                                                                                                                                                                                              |
| EPI_ISL_915336, EPI_ISL_915339                                 | Quest Diagnostics                                                                                                                                                                                                                                                                                                                                                                                                                                                                             | Quest Diagnostics                                                                                                                                                      | Rosenthal,S.H., Gerasimova,A., Kagan,R.M., Anderson, B., Hua, M., Liu Y., Bernstein, L.E., Livingston, K.E., Perez, A., Shalhout, D.F., Shlyakhter, I.A., Owen, R., Tanpaiboon, P., Lachawan, F.                                                                                                                                                                                                                                                                                                                                                                                                                                                                                                                                                                                                                                                            |
| EPI_ISL_918184, EPI_ISL_918247                                 | Innovative Genomics Institute, UC Berkeley                                                                                                                                                                                                                                                                                                                                                                                                                                                    | Innovative Genomics Institute, UC Berkeley                                                                                                                             | Stacia Wyman, Haridha Shivram, Phil Frankino, Liana Lareau, Shana McDevitt, Justin Choi                                                                                                                                                                                                                                                                                                                                                                                                                                                                                                                                                                                                                                                                                                                                                                     |
| EPI_ISL_918458                                                 | 1.AO Universitaria 'S. Giovanni di Dio e Ruggi D'Aragona, Scuola Medica Salernitana' Hospital / 2.UOC di Virologia e Microbiologia, Università della Campania 'L. Vanvitelli' / 3.AO Universitaria 'Federico II' Napoli Hospital / 4.AORN 'San Giuseppe Moscati' Avellino Hospital / 5.AO 'San Pio - presidio G. Rummo' Benevento Hospital / 6.AO 'Sant'Anna e San Sebastiano' Caserta Hospital / 7.PO 'Maria Santissima Addolorata' Eboli Hospital / 8.Biogen Istituto di Ricerche Genetiche | 1. Genome Research Center for Health (CRGS) / 2. Laboratory of Molecular Medicine and Genomics(LMMGE) / 3. Center for Research in Pure and Applied Mathematics (CRMPA) | Giorgio Giurato (Corresponding Author), Francesca Rizzo (Corresponding Author), Alessandro Weisz (Corresponding Author), Gianluigi Franci, Giovanni Nassa, Pasquale Pagliano, Roberta Tarallo, Elena Alexandrova, Ylenia D'Agostino, Carlo Ferravante, Jessica Lamberti, Viola Melone, Domenico Memoli, Valeria Mirici Cappa, Domenico Palumbo, Giovanni Pecoraro, Assunta Selitto, Oriana Strianese, Iliaria Terenzi, Giuseppe Fenza, Aniello Gentile, Antonello Saccamanno, Sonia Amabile, Teresa Rocco, Annamaria Salvati, Emilia Vaccaro, Massimiliano Galdiero, Michele Cennamo, Giuseppe Portella, Maria Grazia Foti, Mariarosaria Ingino, Maria Landi, Maurizio Fumi, Vincenzo Rocco, Rita Greco, Vittoria Letizia, Arnolfo Petruzzello, Maddalena Schioppa, Gregorio Goffredi, Francesca Marciano, Michele Caraglia, Alessia Cossu, Marianna Scrima |
| EPI_ISL_925138                                                 | Quest Diagnostics                                                                                                                                                                                                                                                                                                                                                                                                                                                                             | Quest Diagnostics                                                                                                                                                      | Rosenthal,S.H., Gerasimova,A., Kagan,R.M., Anderson, B., Hua, M., Liu Y., Bernstein, L.E., Livingston, K.E., Perez, A., Shalhout, D.F., Shlyakhter, I.A., Owen, R., Tanpaiboon, P., Lachawan, F.                                                                                                                                                                                                                                                                                                                                                                                                                                                                                                                                                                                                                                                            |
| EPI_ISL_925211, EPI_ISL_925232                                 | New Mexico Department of Health Scientific Laboratory                                                                                                                                                                                                                                                                                                                                                                                                                                         | New Mexico Department of Health Scientific Laboratory                                                                                                                  | Ellie Johnson, Anastacia Griego-Fisher, D'eldra Malone, Jennifer Benoit                                                                                                                                                                                                                                                                                                                                                                                                                                                                                                                                                                                                                                                                                                                                                                                     |
| EPI_ISL_925513, EPI_ISL_925834, EPI_ISL_925835                 | Arizona State Public Health Laboratory                                                                                                                                                                                                                                                                                                                                                                                                                                                        | Arizona State Public Health Laboratory                                                                                                                                 | Trung Huynh, Jessica Escobar, Katherine Fullerton, Nobuko Fukushima, Stacy White, Linda Getsinger, Victor Waddell                                                                                                                                                                                                                                                                                                                                                                                                                                                                                                                                                                                                                                                                                                                                           |
| EPI_ISL_930743                                                 | Utah Public Health Laboratory                                                                                                                                                                                                                                                                                                                                                                                                                                                                 | Utah Public Health Laboratory                                                                                                                                          | Erin L. Young, Kelly F. Oakeson, Tara Gallagher                                                                                                                                                                                                                                                                                                                                                                                                                                                                                                                                                                                                                                                                                                                                                                                                             |
| EPI_ISL_931325                                                 | University Hospital Basel, Clinical Virology                                                                                                                                                                                                                                                                                                                                                                                                                                                  | University Hospital Basel, Clinical Bacteriology                                                                                                                       | Tim Roloff, Madlen Stange, Helena MB Seth-Smith, Alfredo Mari, Karoline Leuzinger, Julia Bielicki, Manuel Bategay, Hans Hirsch, Adrian Egli                                                                                                                                                                                                                                                                                                                                                                                                                                                                                                                                                                                                                                                                                                                 |
| EPI_ISL_931488, EPI_ISL_931504, EPI_ISL_931505                 | Maryland Public Health Laboratory (MD PHL)                                                                                                                                                                                                                                                                                                                                                                                                                                                    | Maryland Public Health Laboratory (MD PHL)                                                                                                                             | Maryland Department of Health Laboratories Administration                                                                                                                                                                                                                                                                                                                                                                                                                                                                                                                                                                                                                                                                                                                                                                                                   |
| EPI_ISL_935039, EPI_ISL_935041                                 | Biolab Diagnostic Laboratories                                                                                                                                                                                                                                                                                                                                                                                                                                                                | Princess Haya Biotechnology Center, Jordan University of Science and Technology                                                                                        | Saied Jaradat, Hazem Haddad, Areej Alquran, Maha Karam, Shereen Issa, Suha Hasan, Amid Abdelnour, Issa Abu-Dayyeh                                                                                                                                                                                                                                                                                                                                                                                                                                                                                                                                                                                                                                                                                                                                           |

|                                                                                                                                                                                                                                                                |                                                                                                             |                                                                                                                     |                                                                                                                                                                                                                                                                                                                                                                                                                                    |
|----------------------------------------------------------------------------------------------------------------------------------------------------------------------------------------------------------------------------------------------------------------|-------------------------------------------------------------------------------------------------------------|---------------------------------------------------------------------------------------------------------------------|------------------------------------------------------------------------------------------------------------------------------------------------------------------------------------------------------------------------------------------------------------------------------------------------------------------------------------------------------------------------------------------------------------------------------------|
| EPI_ISL_935569                                                                                                                                                                                                                                                 | Hopital                                                                                                     | National Reference Center for Viruses of Respiratory Infections, Institut Pasteur, Paris                            | Marion Barbet, Sylvie Behillil, Méline Bizard, Angela Brisebarre, Camille Capel, Etienne Simon-Lorière, Vincent Enouf, Maud Vanpeene, Sylvie van der Werf,Bret Laurent                                                                                                                                                                                                                                                             |
| EPI_ISL_935633                                                                                                                                                                                                                                                 | Labo Analyses med                                                                                           | National Reference Center for Viruses of Respiratory Infections, Institut Pasteur, Paris                            | Marion Barbet, Sylvie Behillil, Méline Bizard, Angela Brisebarre, Camille Capel, Etienne Simon-Lorière, Vincent Enouf, Maud Vanpeene, Sylvie van der Werf,Amzalag Jonas                                                                                                                                                                                                                                                            |
| EPI_ISL_935731, EPI_ISL_935741, EPI_ISL_935747                                                                                                                                                                                                                 | Houston Health Dept.                                                                                        | Houston Health Dept.                                                                                                | Ryker Penn, Pamela Brown, Adolpho Lara                                                                                                                                                                                                                                                                                                                                                                                             |
| EPI_ISL_935818, EPI_ISL_935820, EPI_ISL_935821                                                                                                                                                                                                                 | Cadham Provincial laboratory                                                                                | National Microbiology Laboratory (NML)                                                                              | Anna Majer, Shari Tyson, Grace Seo, Philip Mabon, Elsie Grudeski, Rhiannon Huzarewich, Russell Mandes, Anneliese Landgraff, Jennifer Tanner, Natalie Knox, Morag Graham, Gary Van Domselaar, Paul Van Caeselele, Jared Bullard, David Alexander, Kerry Dust, Nathalie Bastien, Yan Li, Timothy Booth, Darian Hole, Madison Chapel, Kirsten Biggar, CanCOGeN's metadata curation team, Public Health Agency of Canada CanCOGeN team |
| EPI_ISL_935982                                                                                                                                                                                                                                                 | GLENS FALLS HOSPITAL LABORATORY                                                                             | Wadsworth Center, New York State Department of Health                                                               | Kirsten St. George, Daryl M. Lamson, Alexis Russel, Matthew Shudt, Melissa A Leisner, Jonathan Plitnick, Navjot Singh, John Kelly, Erasmus Schneider, Erica Lasek-Nesselquist                                                                                                                                                                                                                                                      |
| EPI_ISL_936011, EPI_ISL_936021                                                                                                                                                                                                                                 | SUNY UPSTATE MEDICAL UNIVERSITY                                                                             | Wadsworth Center, New York State Department of Health                                                               | Kirsten St. George, Daryl M. Lamson, Alexis Russel, Matthew Shudt, Melissa A Leisner, Jonathan Plitnick, Navjot Singh, John Kelly, Erasmus Schneider, Erica Lasek-Nesselquist                                                                                                                                                                                                                                                      |
| EPI_ISL_936025                                                                                                                                                                                                                                                 | THE MARY IMOGENE BASSETT HOSPITAL                                                                           | Wadsworth Center, New York State Department of Health                                                               | Kirsten St. George, Daryl M. Lamson, Alexis Russel, Matthew Shudt, Melissa A Leisner, Jonathan Plitnick, Navjot Singh, John Kelly, Erasmus Schneider, Erica Lasek-Nesselquist                                                                                                                                                                                                                                                      |
| EPI_ISL_936036                                                                                                                                                                                                                                                 | Columbia University Irving Medical Center                                                                   | Wadsworth Center, New York State Department of Health                                                               | Kirsten St. George, Daryl M. Lamson, Alexis Russel, Matthew Shudt, Melissa A Leisner, Jonathan Plitnick, Navjot Singh, John Kelly, Erasmus Schneider, Erica Lasek-Nesselquist                                                                                                                                                                                                                                                      |
| EPI_ISL_936050, EPI_ISL_936057, EPI_ISL_936058, EPI_ISL_936059                                                                                                                                                                                                 | ADIRONDACK MEDICAL CENTER                                                                                   | Wadsworth Center, New York State Department of Health                                                               | Kirsten St. George, Daryl M. Lamson, Alexis Russel, Matthew Shudt, Melissa A Leisner, Jonathan Plitnick, Navjot Singh, John Kelly, Erasmus Schneider, Erica Lasek-Nesselquist                                                                                                                                                                                                                                                      |
| EPI_ISL_936061                                                                                                                                                                                                                                                 | KALEIDA CENTER FOR LABORATORY MEDICINE                                                                      | Wadsworth Center, New York State Department of Health                                                               | Kirsten St. George, Daryl M. Lamson, Alexis Russel, Matthew Shudt, Melissa A Leisner, Jonathan Plitnick, Navjot Singh, John Kelly, Erasmus Schneider, Erica Lasek-Nesselquist                                                                                                                                                                                                                                                      |
| EPI_ISL_936065, EPI_ISL_936066                                                                                                                                                                                                                                 | Columbia University Irving Medical Center                                                                   | Wadsworth Center, New York State Department of Health                                                               | Kirsten St. George, Daryl M. Lamson, Alexis Russel, Matthew Shudt, Melissa A Leisner, Jonathan Plitnick, Navjot Singh, John Kelly, Erasmus Schneider, Erica Lasek-Nesselquist                                                                                                                                                                                                                                                      |
| EPI_ISL_936067, EPI_ISL_936087, EPI_ISL_936088                                                                                                                                                                                                                 | KALEIDA CENTER FOR LABORATORY MEDICINE                                                                      | Wadsworth Center, New York State Department of Health                                                               | Kirsten St. George, Daryl M. Lamson, Alexis Russel, Matthew Shudt, Melissa A Leisner, Jonathan Plitnick, Navjot Singh, John Kelly, Erasmus Schneider, Erica Lasek-Nesselquist                                                                                                                                                                                                                                                      |
| EPI_ISL_936105, EPI_ISL_936109, EPI_ISL_936110, EPI_ISL_936114, EPI_ISL_936115, EPI_ISL_936117, EPI_ISL_936118, EPI_ISL_936120, EPI_ISL_936123, EPI_ISL_936127, EPI_ISL_936128                                                                                 | see above                                                                                                   | WESTCHESTER MEDICAL CENTER                                                                                          | Wadsworth Center, New York State Department of Health                                                                                                                                                                                                                                                                                                                                                                              |
| EPI_ISL_936132                                                                                                                                                                                                                                                 | New York Presbyterian Hospital                                                                              | Wadsworth Center, New York State Department of Health                                                               | Kirsten St. George, Daryl M. Lamson, Alexis Russel, Matthew Shudt, Melissa A Leisner, Jonathan Plitnick, Navjot Singh, John Kelly, Erasmus Schneider, Erica Lasek-Nesselquist                                                                                                                                                                                                                                                      |
| EPI_ISL_936141                                                                                                                                                                                                                                                 | THE MARY IMOGENE BASSETT HOSPITAL                                                                           | Wadsworth Center, New York State Department of Health                                                               | Kirsten St. George, Daryl M. Lamson, Alexis Russel, Matthew Shudt, Melissa A Leisner, Jonathan Plitnick, Navjot Singh, John Kelly, Erasmus Schneider, Erica Lasek-Nesselquist                                                                                                                                                                                                                                                      |
| EPI_ISL_936147                                                                                                                                                                                                                                                 | New York Presbyterian Hospital                                                                              | Wadsworth Center, New York State Department of Health                                                               | Kirsten St. George, Daryl M. Lamson, Alexis Russel, Matthew Shudt, Melissa A Leisner, Jonathan Plitnick, Navjot Singh, John Kelly, Erasmus Schneider, Erica Lasek-Nesselquist                                                                                                                                                                                                                                                      |
| EPI_ISL_936162, EPI_ISL_936165, EPI_ISL_936172                                                                                                                                                                                                                 | MEMORIAL SLOAN KETTERING CANCER CENTER                                                                      | Wadsworth Center, New York State Department of Health                                                               | Kirsten St. George, Daryl M. Lamson, Alexis Russel, Matthew Shudt, Melissa A Leisner, Jonathan Plitnick, Navjot Singh, John Kelly, Erasmus Schneider, Erica Lasek-Nesselquist                                                                                                                                                                                                                                                      |
| EPI_ISL_936173                                                                                                                                                                                                                                                 | TEMPUS LABS INC                                                                                             | Wadsworth Center, New York State Department of Health                                                               | Kirsten St. George, Daryl M. Lamson, Alexis Russel, Matthew Shudt, Melissa A Leisner, Jonathan Plitnick, Navjot Singh, John Kelly, Erasmus Schneider, Erica Lasek-Nesselquist                                                                                                                                                                                                                                                      |
| EPI_ISL_936179                                                                                                                                                                                                                                                 | MEMORIAL SLOAN KETTERING CANCER CENTER                                                                      | Wadsworth Center, New York State Department of Health                                                               | Kirsten St. George, Daryl M. Lamson, Alexis Russel, Matthew Shudt, Melissa A Leisner, Jonathan Plitnick, Navjot Singh, John Kelly, Erasmus Schneider, Erica Lasek-Nesselquist                                                                                                                                                                                                                                                      |
| EPI_ISL_936180                                                                                                                                                                                                                                                 | ALBANY MEDICAL CENTER                                                                                       | Wadsworth Center, New York State Department of Health                                                               | Kirsten St. George, Daryl M. Lamson, Alexis Russel, Matthew Shudt, Melissa A Leisner, Jonathan Plitnick, Navjot Singh, John Kelly, Erasmus Schneider, Erica Lasek-Nesselquist                                                                                                                                                                                                                                                      |
| EPI_ISL_936239, EPI_ISL_936242, EPI_ISL_936244                                                                                                                                                                                                                 | Wadsworth Center, New York State Department of Health                                                       | Wadsworth Center, New York State Department of Health                                                               | Kirsten St. George, Daryl M. Lamson, Alexis Russel, Matthew Shudt, Melissa A Leisner, Jonathan Plitnick, Navjot Singh, John Kelly, Erasmus Schneider, Erica Lasek-Nesselquist                                                                                                                                                                                                                                                      |
| EPI_ISL_936248, EPI_ISL_936256, EPI_ISL_936261, EPI_ISL_936267, EPI_ISL_936269, EPI_ISL_936272, EPI_ISL_936275, EPI_ISL_936276, EPI_ISL_936277, EPI_ISL_936281, EPI_ISL_936285, EPI_ISL_936288, EPI_ISL_936292, EPI_ISL_936293, EPI_ISL_936296, EPI_ISL_936298 | see above                                                                                                   | MONTEFIORE MEDICAL CENTER LABORATORIES                                                                              | Wadsworth Center, New York State Department of Health                                                                                                                                                                                                                                                                                                                                                                              |
| EPI_ISL_936300                                                                                                                                                                                                                                                 | Wadsworth Center, New York State Department of Health                                                       | Wadsworth Center, New York State Department of Health                                                               | Kirsten St. George, Daryl M. Lamson, Alexis Russel, Matthew Shudt, Melissa A Leisner, Jonathan Plitnick, Navjot Singh, John Kelly, Erasmus Schneider, Erica Lasek-Nesselquist                                                                                                                                                                                                                                                      |
| EPI_ISL_936401, EPI_ISL_936414, EPI_ISL_936454, EPI_ISL_936459                                                                                                                                                                                                 | TGen North                                                                                                  | TGen North                                                                                                          | Jolene Bowers, Megan Folkerts, Chris French, Hayley Yaglom, Ashlyn Pfeiffer, Darrin Lemmer, Dave Engelthaler, The Arizona COVID Genomics Union (ACGU)                                                                                                                                                                                                                                                                              |
| EPI_ISL_936643, EPI_ISL_936711, EPI_ISL_936770, EPI_ISL_936877, EPI_ISL_936893, EPI_ISL_936920, EPI_ISL_936934, EPI_ISL_936960, EPI_ISL_936964                                                                                                                 | Northwestern Memorial Hospital                                                                              | Ozer Lab                                                                                                            | Ramon Lorenzo-Redondo, Lacy M. Simons, Chad J. Achenbach, Lawrence J. Jennings, Michael G. Ison, Judd F. Hultquist, Egon A. Ozer                                                                                                                                                                                                                                                                                                   |
| EPI_ISL_937338                                                                                                                                                                                                                                                 | Utah Public Health Laboratory                                                                               | Utah Public Health Laboratory                                                                                       | Erin L. Young, Kelly F. Oakeson, Tara Gallagher                                                                                                                                                                                                                                                                                                                                                                                    |
| EPI_ISL_937394                                                                                                                                                                                                                                                 | Maine Health and Environmental Testing Laboratory (Maine HETL)                                              | Tewhey Lab, The Jackson Laboratory                                                                                  | Matluk,N., Dewey,H., Iosue,F., Barter,M., Lynch,R., Munger,H. and Tewhey,R.                                                                                                                                                                                                                                                                                                                                                        |
| EPI_ISL_940081                                                                                                                                                                                                                                                 | Charlotte Maxeke Johannesburg Academic Hospital, National Health Laboratory Services, Gauteng, South Africa | National Institute for Communicable Diseases of the National Health Laboratory Service                              | Amoako DG, Mohale T, Ntuli N, Mahlangu B, Allam M, Ismail A, Bhiman JN                                                                                                                                                                                                                                                                                                                                                             |
| EPI_ISL_940274, EPI_ISL_940542, EPI_ISL_940543                                                                                                                                                                                                                 | Hôpital Bichat Claude Bernard, Laboratoire de Virologie                                                     | IAME UMR1137 Inserm, Université de Paris, Hôpital Bichat                                                            | Antoine Bridier-Nahmias, Amélie Recoing, Quentin Le Hingrat, Lena Daniel, Siham Hamri, Gilles Collin, Alexandre Storto, Mélanie Bertine, Charlotte Charpentier, Nadhira Houhou-Fidouh, Diane Descamps, Benoit Visseaux                                                                                                                                                                                                             |
| EPI_ISL_940612                                                                                                                                                                                                                                                 | Hospital de Campanha para Enfrentamento do Coronavírus - Goiania                                            | Instituto Adolfo Lutz, Interdisciplinary Procedures Center, Strategic Laboratory                                    | Claudio Tavares Sacchi, Claudia Regina Gonçalves, Erica Valessa Ramos Gomes, Karoline Rodrigues Campos                                                                                                                                                                                                                                                                                                                             |
| EPI_ISL_940779                                                                                                                                                                                                                                                 | Platform BIS UZA/UAntwerpen                                                                                 | UAntwerp, Laboratory of Medical Microbiology, Campus Drie Eiken S6.26, Universiteitsplein 1, 2610, Wilrijk, Belgium | Basil Britto Xavier, Jasmine Coppens, Marie Le Mercier, Christine Lammens, Veerle Matheussen, Herman Goossens                                                                                                                                                                                                                                                                                                                      |
| EPI_ISL_940864                                                                                                                                                                                                                                                 | Vaccines and Infectious Diseases Analytics Research Unit (VIDA)                                             | KRISP, KZN Research Innovation and Sequencing Platform                                                              | Baillie Vicky, du Plessis Jeanine, Giandhari Jennifer, Pillay Sureshnee, Naidoo Yeshnee, Tegally Hourriyah, de Oliveira Tulio, Madhi Shabir                                                                                                                                                                                                                                                                                        |
| EPI_ISL_940929                                                                                                                                                                                                                                                 | Centers for Disease Control and Prevention, Dengue Branch                                                   | Centers for Disease Control and Prevention, Dengue Branch                                                           | Gilberto A. Santiago, Glenda Gonzalez, Betzabel Flores, Keyla Charriez, Gabriela Paz-Bailey, Jorge L. Munoz-Jordan                                                                                                                                                                                                                                                                                                                 |

|                                                                                                |                                                                                                                                                    |                                                                                                                                                                                                                                                         |                                                                                                                                                                                                                                                                                                                                                                                                                                                                                                                                                                                                                                                                                                                                                                 |
|------------------------------------------------------------------------------------------------|----------------------------------------------------------------------------------------------------------------------------------------------------|---------------------------------------------------------------------------------------------------------------------------------------------------------------------------------------------------------------------------------------------------------|-----------------------------------------------------------------------------------------------------------------------------------------------------------------------------------------------------------------------------------------------------------------------------------------------------------------------------------------------------------------------------------------------------------------------------------------------------------------------------------------------------------------------------------------------------------------------------------------------------------------------------------------------------------------------------------------------------------------------------------------------------------------|
| EPI_ISL_941287, EPI_ISL_941289, EPI_ISL_941290, EPI_ISL_941294, EPI_ISL_941296                 | Nigeria Centre for Disease Control (NCDC)                                                                                                          | African Centre of Excellence for Genomics of Infectious Diseases (ACEGID), Redeemer's University                                                                                                                                                        | Oluniyi P.E. et al                                                                                                                                                                                                                                                                                                                                                                                                                                                                                                                                                                                                                                                                                                                                              |
| EPI_ISL_941947                                                                                 | Centro de Investigaciones en Microbiología y Biotecnología-UR (CIMBIUR), Facultad de Ciencias Naturales, Universidad del Rosario, Bogotá, Colombia | Centro de Investigaciones en Microbiología y Biotecnología-UR (CIMBIUR), Facultad de Ciencias Naturales, Universidad del Rosario, Bogotá, Colombia Instituto Nacional de Salud, Bogotá, Colombia Icahn School of Medicine at Mount Sinai, New York, USA | Luz Helena Patiño, Marina Muñoz, Nathalia Ballesteros, Carolina Hernández, Carolina Flórez, Sergio Gomez, Adriana van de Guchte, Zenab Khan, Jayeeta Dutta, Hala Alejel Alshammry, Ana S. Gonzalez-Reiche, Matthew M. Hernandez, Emilia Mia Sordillo, Viviana Simon, Harm van Bakel, Alberto Paniz-Mondolfi, Juan David Ramirez                                                                                                                                                                                                                                                                                                                                                                                                                                 |
| EPI_ISL_942152                                                                                 | Wisconsin State Laboratory of Hygiene Communicable Disease Division                                                                                | Wisconsin State Laboratory of Hygiene Communicable Disease Division                                                                                                                                                                                     | Kelsey R. Florek, Abigail C. Shockey                                                                                                                                                                                                                                                                                                                                                                                                                                                                                                                                                                                                                                                                                                                            |
| EPI_ISL_942334, EPI_ISL_942353                                                                 | MD PHL                                                                                                                                             | MD PHL                                                                                                                                                                                                                                                  | Maryland Department of Health Laboratories Administration                                                                                                                                                                                                                                                                                                                                                                                                                                                                                                                                                                                                                                                                                                       |
| EPI_ISL_942469, EPI_ISL_942677, EPI_ISL_942743                                                 | Gundersen Molecular Diagnostics Laboratory                                                                                                         | Kabara Cancer Research Institute                                                                                                                                                                                                                        | Craig S. Richmond, Paraic A. Kenny                                                                                                                                                                                                                                                                                                                                                                                                                                                                                                                                                                                                                                                                                                                              |
| EPI_ISL_942900, EPI_ISL_942915                                                                 | Houston Health Dept.                                                                                                                               | Houston Health Dept.                                                                                                                                                                                                                                    | Ryker Penn, Pamela Brown, Adolpho Lara                                                                                                                                                                                                                                                                                                                                                                                                                                                                                                                                                                                                                                                                                                                          |
| EPI_ISL_942935                                                                                 | Wyoming Public Health Laboratory                                                                                                                   | Wyoming Public Health Laboratory                                                                                                                                                                                                                        | Noah Hull, Taylor Fearing, Lynette Gumbleton, Channing Weber, Ashley Norberg, Bailey Bowcutt, and Wanda Manley                                                                                                                                                                                                                                                                                                                                                                                                                                                                                                                                                                                                                                                  |
| EPI_ISL_942945, EPI_ISL_942950                                                                 | Gundersen Molecular Diagnostics Laboratory                                                                                                         | Kabara Cancer Research Institute                                                                                                                                                                                                                        | Craig S. Richmond, Paraic A. Kenny                                                                                                                                                                                                                                                                                                                                                                                                                                                                                                                                                                                                                                                                                                                              |
| EPI_ISL_943894, EPI_ISL_943913, EPI_ISL_943914, EPI_ISL_943955                                 | Utah Public Health Laboratory                                                                                                                      | Utah Public Health Laboratory                                                                                                                                                                                                                           | Erin L. Young, Kelly F. Oakeson, Tara Gallagher                                                                                                                                                                                                                                                                                                                                                                                                                                                                                                                                                                                                                                                                                                                 |
| EPI_ISL_944302, EPI_ISL_944310                                                                 | Israel Central Virology laboratory                                                                                                                 | Israel National Consortium for SARS-CoV-2 sequencing                                                                                                                                                                                                    | Neta Zuckerman, Efrat Dahan Bucris, Michal Mandelboim, Dana Bar-Ilan, Oran Erster, Tzvia Mann, Omer Murik, David A. Zeevi, Assaf Rokney, Joseph Jaffe, Eva Nachum, Maya Davidovich Cohen, Ephraim Fass, Gal Zizelski Valenci, Mor Rubinstein, Efrat Rorman, Israel Nissan, Efrat Glick-Saar, Omri Nayshool, Gideon Rechavi, Ella Mendelson, Orna Mor                                                                                                                                                                                                                                                                                                                                                                                                            |
| EPI_ISL_944765                                                                                 | CSIR-Indian Institute of Chemical Biology, MEDICA Supercecialty Hospital Kolkata                                                                   | CSIR-Indian Institute of Chemical Biology, MEDICA Supercecialty Hospital Kolkata                                                                                                                                                                        | Sujay Krishna Maity, Priyanka Mallick, Debaleena Bhowmik, Abhishake Lahiri, Dr. Aviral Roy, Dr. Soumen Saha, Dr. Arpita Ghosh Mitra, Dr. Rajesh Pandey, Dr. Sandip Paul, Dr. Partha Chakrabarti, Dr. Saikat Chakrabarti                                                                                                                                                                                                                                                                                                                                                                                                                                                                                                                                         |
| EPI_ISL_951024                                                                                 | Oxford Viroemics, NDM, University of Oxford; Oxford University Hospitals; Basingstoke and North Hampshire Hospital                                 | COVID-19 Genomics UK (COG-UK) Consortium                                                                                                                                                                                                                | Tanya Golubchik, David Bonsall, George Macintyre, Amy Trebes, Mariateresa de Cesare, Catrin Moore, Alex Mobbs, Anita Justice, Robert Shaw, Monique Andersson, Timothy Peto, Emma Wise, Nathan Moore, Jessica Lynch, Nick Cortes, Matilde Mori, Stephen Kidd, David Buck, John Todd, Christophe Fraser                                                                                                                                                                                                                                                                                                                                                                                                                                                           |
| EPI_ISL_954180                                                                                 | Hospital Universitari Vall d'Hebron - Vall d'Hebron Institut de Rercerca                                                                           | Hospital Universitari Vall d'Hebron                                                                                                                                                                                                                     | Cristina Andrés, Maria Piñana, Josep F Abril, Damir Garcia-Cehic, Ariadna Rando, Juliana Esperalba, Maria Gema Codina, Carla Castillo, Maria Carmen Martín, Tomás Pumarola, Josep Quer, Andrés Antón                                                                                                                                                                                                                                                                                                                                                                                                                                                                                                                                                            |
| EPI_ISL_954901, EPI_ISL_954930, EPI_ISL_955015, EPI_ISL_955016, EPI_ISL_955039, EPI_ISL_955045 | Colorado Department of Public Health and Environment                                                                                               | Colorado Department of Puplic Health and Environment                                                                                                                                                                                                    | Laura Bankers, Molly C. Hetherington-Rauth, Diana Ir, Shannon Ely, Shannon R. Matzinger, Sarah Elizabeth Totten, Emily A. Travanty                                                                                                                                                                                                                                                                                                                                                                                                                                                                                                                                                                                                                              |
| EPI_ISL_955333                                                                                 | AR Dept. of Health-PHL, Molecular Diagnostics                                                                                                      | Pathogen Discovery, Respiratory Viruses Branch, Division of Viral Diseases, Centers for Disease Control and Prevention                                                                                                                                  | Ying Tao, Jing Zhang, Yan Li, Krista Queen, Anna Uehara, Peter Cook, Clinton R. Paden, Haibin Wang, Suxiang Tong                                                                                                                                                                                                                                                                                                                                                                                                                                                                                                                                                                                                                                                |
| EPI_ISL_955862, EPI_ISL_955926                                                                 | University of Michigan Clinical Microbiology Laboratory                                                                                            | Lauring Lab, University of Michigan, Department of Microbiology and Immunology                                                                                                                                                                          | Valesano                                                                                                                                                                                                                                                                                                                                                                                                                                                                                                                                                                                                                                                                                                                                                        |
| EPI_ISL_956298                                                                                 | Laboratorio de salud publica del Valle del Cauca                                                                                                   | Instituto Nacional de Salud- Dirección de Investigación en Salud Pública                                                                                                                                                                                | Katherine Laiton-Donato, Diego A. Álvarez-Díaz, Carlos Franco-Muñoz, Mauricio Pacheco-Montealegre, Hector Alejandro Ruiz-Moreno, Maria T. Herrera-Sepúlveda, Diego Andrés Prada, Jhonnatan Reales-González, Sheryll Corchuelo, Julian Naizaque, Gerardo Santamaría, Magdalena Wiesner, Martha Lucia Ospina Martinez, Marcela Mercado-Reyes                                                                                                                                                                                                                                                                                                                                                                                                                      |
| EPI_ISL_958616                                                                                 | Lighthouse Lab in Milton Keynes                                                                                                                    | Wellcome Sanger Institute for the COVID-19 Genomics UK (COG-UK) Consortium                                                                                                                                                                              | The Lighthouse Lab in Milton Keynes and Alex Alderton, Roberto Amato, Sonia Goncalves, Ewan Harrison, David K. Jackson, Ian Johnston, Dominic Kwiatkowski, Cordelia Langford, John Sillitoe on behalf of the Wellcome Sanger Institute COVID-19 Surveillance Team                                                                                                                                                                                                                                                                                                                                                                                                                                                                                               |
| EPI_ISL_959569                                                                                 | Labo Luc Olivier                                                                                                                                   | GIGA Medical Genomics                                                                                                                                                                                                                                   | Keith Durkin, Maria Artesi, Sébastien Bontems, Raphaël Boreux, Bouchra Boujemla, Cécile Meex, Pierrette Melin, Marie-Pierre Hayette, Vincent Bours                                                                                                                                                                                                                                                                                                                                                                                                                                                                                                                                                                                                              |
| EPI_ISL_960385                                                                                 | University of Wisconsin-Madison AIDS Vaccine Research Laboratories                                                                                 | University of Wisconsin-Madison AIDS Vaccine Research Laboratories                                                                                                                                                                                      | Gage Moreno, Katarina Braun, et al. AIDS Vaccine Research Laboratories                                                                                                                                                                                                                                                                                                                                                                                                                                                                                                                                                                                                                                                                                          |
| EPI_ISL_961480                                                                                 | Michigan Department of Health and Human Services, Bureau of Laboratories                                                                           | Michigan Department of Health and Human Services, Bureau of Laboratories                                                                                                                                                                                | Blankenship HM, Riner D, Soehnlén MK                                                                                                                                                                                                                                                                                                                                                                                                                                                                                                                                                                                                                                                                                                                            |
| EPI_ISL_961609                                                                                 | Hôpital Georges L. Dumont                                                                                                                          | National Microbiology Laboratory (NML)                                                                                                                                                                                                                  | Anna Majer, Shari Tyson, Grace Seo, Philip Mabon, Elsie Grudeski, Rhiannon Huzarewich, Russell Mandes, Anneliese Landgraaf, Jennifer Tanner, Natalie Knox, Morag Graham, Gary Van Domselaar, Richard Garceau, Guillaume Desnoyers, Nathalie Bastien, Yan Li, Timothy Booth, Darian Hole, Madison Chapel, Kirsten Biggar, CanCOGeN's metadata curation team, Public Health Agency of Canada CanCOGeN team                                                                                                                                                                                                                                                                                                                                                        |
| EPI_ISL_961759                                                                                 | Viral Respiratory Lab, National Institute for Biomedical Research (INRB)                                                                           | Pathogen Sequencing Lab, National Institute for Biomedical Research (INRB)                                                                                                                                                                              | Placide Mbala-Kingebeni, Edith Nkwembe, Eddy Kinganda-Lusamaki, Amuri Aziza, Francisca Muyembe Mawete, Emmanuel Lokilo Lofiko, Jean-Claude Makangara Cigolo, Catherine Pratt, Matthias Pauthner, Josh Quick, Allison Black, James Hadfield, Trevor Bedford, Ian Goodfellow, Andrew Rambaut, Nick Loman, Kristian Andersen, Michael Wiley, Steve Ahuka-Mundeke, Jean-Jacques Muyembe Tamfum                                                                                                                                                                                                                                                                                                                                                                      |
| EPI_ISL_962286, EPI_ISL_962297                                                                 | Seattle Flu Study                                                                                                                                  | Seattle Flu Study                                                                                                                                                                                                                                       | Deborah A. Nickerson, Chris D. Frazar, Jover Lee, Benjamin Pelle, Erica Ryke, Matthew Richardson, Amanda Adler, Elisabeth Brandstetter, Peter D. Han, Kairsten Fay, Misja Ilcin, Kirsten Lacombe, Thomas R. Sibley, Melissa Truong, Caitlin R. Wolf, Karen Cowgill, Stephanie Schrag, Jeff Duchin, Michael Boeckh, Janet A. Englund, Michael Famulare, Barry R. Lutz, Mark J. Rieder, Lea M. Starita, Matthew Thompson, Helen Y. Chu, Trevor Bedford, Jay Shendure                                                                                                                                                                                                                                                                                              |
| EPI_ISL_962312                                                                                 | Altius Institute for Biomedical Sciences                                                                                                           | Seattle Flu Study                                                                                                                                                                                                                                       | Deborah A. Nickerson, Chris D. Frazar, Jover Lee, Benjamin Pelle, Erica Ryke, Matthew Richardson, Amanda Adler, Elisabeth Brandstetter, Peter D. Han, Kairsten Fay, Misja Ilcin, Kirsten Lacombe, Thomas R. Sibley, Melissa Truong, Caitlin R. Wolf, Ryan Alexander, Daniel Bates, Rebecca Bruders, Stephanie DeBaun, Clem Green, Muhammad Halimun, Jessica Halow, Kneshay Harper, Matt Hartman, Andrew Meuser, Alex Nguyen, Truong Nguyen, Sofia Olsson, Sadie Patraw, Hannah Petersen, Tobias Ragozcy, Joshua Richards, Jacob Rodriguez, John Stamatoyannopoulos, Julia Wald, Olivia Waltner, Michael Boeckh, Janet A. Englund, Michael Famulare, Barry R. Lutz, Mark J. Rieder, Lea M. Starita, Matthew Thompson, Helen Y. Chu, Jay Shendure, Trevor Bedford |
| EPI_ISL_962455                                                                                 | Seattle Flu Study                                                                                                                                  | Seattle Flu Study                                                                                                                                                                                                                                       | Deborah A. Nickerson, Chris D. Frazar, Jover Lee, Benjamin Pelle, Erica Ryke, Matthew Richardson, Amanda Adler, Elisabeth Brandstetter, Peter D. Han, Kairsten Fay, Misja Ilcin, Kirsten Lacombe, Thomas R. Sibley, Melissa Truong, Caitlin R. Wolf, Karen Cowgill, Stephanie Schrag, Jeff Duchin, Michael Boeckh, Janet A. Englund, Michael Famulare, Barry R. Lutz, Mark J. Rieder, Lea M. Starita, Matthew Thompson, Helen Y. Chu, Trevor Bedford, Jay Shendure                                                                                                                                                                                                                                                                                              |
| EPI_ISL_962622                                                                                 | Scripps Medical Laboratory                                                                                                                         | Andersen lab at Scripps Research                                                                                                                                                                                                                        | SEARCH Alliance San Diego with Michael Quigley, Elen Stefanski, Ian Mchardy                                                                                                                                                                                                                                                                                                                                                                                                                                                                                                                                                                                                                                                                                     |
| EPI_ISL_964351, EPI_ISL_964437, EPI_ISL_964482, EPI_ISL_964483, EPI_ISL_964518, EPI_ISL_964527 | Lighthouse Lab in Glasgow                                                                                                                          | Wellcome Sanger Institute for the COVID-19 Genomics UK (COG-UK) Consortium                                                                                                                                                                              | Harper VanSteenhouse, Yumi Kasai, David Gray, Carol Clugston, Anna Dominiczak and Alex Alderton, Roberto Amato, Sonia Goncalves, Ewan Harrison, David K. Jackson, Ian Johnston, Dominic Kwiatkowski, Cordelia Langford, John Sillitoe on behalf of the Wellcome Sanger Institute COVID-19 Surveillance Team                                                                                                                                                                                                                                                                                                                                                                                                                                                     |
| EPI_ISL_965088, EPI_ISL_965092, EPI_ISL_965100, EPI_ISL_965102                                 | Wyoming Public Health Laboratory                                                                                                                   | Wyoming Public Health Laboratory                                                                                                                                                                                                                        | Noah Hull, Taylor Fearing, Lynette Gumbleton, Channing Weber, Ashley Norberg, Bailey Bowcutt, and Wanda Manley                                                                                                                                                                                                                                                                                                                                                                                                                                                                                                                                                                                                                                                  |
| EPI_ISL_965157                                                                                 | Clinical Molecular Microbiology Laboratory, UNC Hospitals                                                                                          | Jeremy Wang                                                                                                                                                                                                                                             | Jeremy Wang, Alexander Rubinsteyn, Colleen Rice, Jason Smedberg, Shawn Hawken, Melissa Miller, Corbin Jones, Robert Hagan                                                                                                                                                                                                                                                                                                                                                                                                                                                                                                                                                                                                                                       |
| EPI_ISL_965848, EPI_ISL_965850                                                                 | GA Department of Public Health                                                                                                                     | GA Department of Public Health                                                                                                                                                                                                                          | Stacy Reeves, Jonathan Edwards, Cynthia Dixey, Tonia Parrott                                                                                                                                                                                                                                                                                                                                                                                                                                                                                                                                                                                                                                                                                                    |

|                                                                                                                |                                                                                                          |                                                                                                                                                   |                                                                                                                                                                                                                                                                                                                                                                                                                                                                                                                                                                                                  |
|----------------------------------------------------------------------------------------------------------------|----------------------------------------------------------------------------------------------------------|---------------------------------------------------------------------------------------------------------------------------------------------------|--------------------------------------------------------------------------------------------------------------------------------------------------------------------------------------------------------------------------------------------------------------------------------------------------------------------------------------------------------------------------------------------------------------------------------------------------------------------------------------------------------------------------------------------------------------------------------------------------|
| EPI_ISL_966312                                                                                                 | Toronto Invasive Bacterial Diseases Network                                                              | McMaster University                                                                                                                               | Allison McGeer, Patryk Aftanas, Hooman Derakhshani, Angel Li, Kuganya Nirmalarajah, Emily Panousis, Ahmed Draia, Jalees Nasir, Michael Surette, Samira Mubareka, Andrew G. McArthur                                                                                                                                                                                                                                                                                                                                                                                                              |
| EPI_ISL_966337                                                                                                 | Kansas Health and Environmental Lab                                                                      | Kansas Health and Environmental Lab                                                                                                               | Mike Grose, Paige Drury, Carissa Robertson, Ben Olsen, and Phil Adam                                                                                                                                                                                                                                                                                                                                                                                                                                                                                                                             |
| EPI_ISL_966684, EPI_ISL_966703, EPI_ISL_966743                                                                 | Helix/Illumina                                                                                           | Respiratory Viruses Branch, Division of Viral Diseases, Centers for Disease Control and Prevention                                                | Peter W. Cook, Dakota Howard, Dhvani Batra, Ben L. Rambo-Martin, Eileen de Feo, Jan Antico, Christine Tran, Matthew Tolentino, Shannon Wickline, Kim Gietzen, Brad Sickler, Jingtao Liu, Eric Allen, Phil Febbo, Summer Galloway, Nicole L. Washington, Simon White, Geraint Levan, Kelly Schiabor Barrett, Elizabeth Cirulli, Alexandre Bolze, Ary Ascencio, Charlotte Rivera-Garcia, Ryan Cho, Jason Nguyen, Sherry Wang, Jimmy Ramirez, Tyler Cassens, Efrén Sandoval, Magnus Isaksson, William Lee, David Becker, Marc Laurent, James Lu, Clinton R. Paden, Suxiang Tong, Duncan MacCannell, |
| EPI_ISL_966807, EPI_ISL_966809, EPI_ISL_966829, EPI_ISL_966830, EPI_ISL_966851                                 | Maine HETL                                                                                               | Tewhey Lab, The Jackson Laboratory                                                                                                                | Matluk, N., Dewey, H., Iosue, F., Barter, M., Lynch, R., Munger, H. and Tewhey, R.                                                                                                                                                                                                                                                                                                                                                                                                                                                                                                               |
| EPI_ISL_966960, EPI_ISL_967000, EPI_ISL_967025, EPI_ISL_967046, EPI_ISL_967217, EPI_ISL_967365, EPI_ISL_967400 | Helix/Illumina                                                                                           | Respiratory Viruses Branch, Division of Viral Diseases, Centers for Disease Control and Prevention                                                | Peter W. Cook, Dakota Howard, Dhvani Batra, Ben L. Rambo-Martin, Eileen de Feo, Jan Antico, Christine Tran, Matthew Tolentino, Shannon Wickline, Kim Gietzen, Brad Sickler, Jingtao Liu, Eric Allen, Phil Febbo, Summer Galloway, Nicole L. Washington, Simon White, Geraint Levan, Kelly Schiabor Barrett, Elizabeth Cirulli, Alexandre Bolze, Ary Ascencio, Charlotte Rivera-Garcia, Ryan Cho, Jason Nguyen, Sherry Wang, Jimmy Ramirez, Tyler Cassens, Efrén Sandoval, Magnus Isaksson, William Lee, David Becker, Marc Laurent, James Lu, Clinton R. Paden, Suxiang Tong, Duncan MacCannell, |
| EPI_ISL_967764                                                                                                 | State Laboratories Division, Hawaii State Department of Health                                           | State Laboratories Division, Hawaii State Department of Health                                                                                    | Pamela O'Brien, Drew Kuwazaki, Ayana Garnet, Razvan Sultana, Edward Desmond                                                                                                                                                                                                                                                                                                                                                                                                                                                                                                                      |
| EPI_ISL_968036                                                                                                 | TGen North                                                                                               | Sonora Quest Laboratories                                                                                                                         | "Jolene Bowers, Megan Folkerts, Chris French, Hayley Yaglom, Ashlyn Pfeiffer, Darrin Lemmer, Dave Engelthaler, The Arizona COVID Genomics Union (ACGU)"                                                                                                                                                                                                                                                                                                                                                                                                                                          |
| EPI_ISL_968065                                                                                                 | TGen North                                                                                               | TGen North                                                                                                                                        | "Jolene Bowers, Megan Folkerts, Chris French, Hayley Yaglom, Ashlyn Pfeiffer, Darrin Lemmer, Dave Engelthaler, The Arizona COVID Genomics Union (ACGU)"                                                                                                                                                                                                                                                                                                                                                                                                                                          |
| EPI_ISL_968189, EPI_ISL_968197                                                                                 | Arizona State Public Health Laboratory                                                                   | Arizona State Public Health Laboratory                                                                                                            | Trung Huynh, Jessica Escobar, Katherine Fullerton, Nobuko Fukushima, Stacy White, Linda Getsinger, Victor Waddell                                                                                                                                                                                                                                                                                                                                                                                                                                                                                |
| EPI_ISL_968858, EPI_ISL_968904, EPI_ISL_968926                                                                 | KEMRI-Wellcome Trust Research Programme/KEMRI-CGMR-C Kilifi                                              | KEMRI-Wellcome Trust Research Programme/KEMRI-CGMR-C Kilifi                                                                                       | Githinji et al                                                                                                                                                                                                                                                                                                                                                                                                                                                                                                                                                                                   |
| EPI_ISL_971381, EPI_ISL_971933, EPI_ISL_972287, EPI_ISL_972288, EPI_ISL_973038, EPI_ISL_973079, EPI_ISL_973638 | Department of Virus and Microbiological Special Diagnostics, Statens Serum Institut, Copenhagen, Denmark | Aalborg University                                                                                                                                | Danish Covid-19 Genome Consortium                                                                                                                                                                                                                                                                                                                                                                                                                                                                                                                                                                |
| EPI_ISL_976959, EPI_ISL_976990, EPI_ISL_977016                                                                 | Broad Institute Clinical Research Sequencing Platform                                                    | Infectious Disease Program, Broad Institute of Harvard and MIT                                                                                    | Lemieux, J.E., Siddle, K.J., Adams, G., Gladden-Young, A., Lagerborg, K., Rudy, M., DeRuff, K., Carter, A., Normandin, E., Bauer, M., Reilly, S., Tomkins-Tinch, C., Loreth, C., Chaluvadi, S., Birren, B.W., Gallagher, G., Smole, S., Park, D.J., MacInnis, B.L., and Sabeti, P.C.                                                                                                                                                                                                                                                                                                             |
| EPI_ISL_977051, EPI_ISL_977054                                                                                 | Rhode Island Department of Health                                                                        | Infectious Disease Program, Broad Institute of Harvard and MIT                                                                                    | Lemieux, J.E., Siddle, K.J., Huard, R., King, E., Azevedo, K., Miller, A., Adams, G., Gladden-Young, A., Lagerborg, K., Rudy, M., DeRuff, K., Carter, A., Normandin, E., Bauer, M., Reilly, S., Tomkins-Tinch, C., Loreth, C., Chaluvadi, S., Birren, B.W., Gallagher, G., Smole, S., Park, D.J., MacInnis, B.L., and Sabeti, P.C.                                                                                                                                                                                                                                                               |
| EPI_ISL_977257, EPI_ISL_977321, EPI_ISL_977364, EPI_ISL_977367                                                 | University of Zambia, School of Veterinary Medicine                                                      | UNZAVET and PATH                                                                                                                                  | Mulenga Mwenda-Chimfwembe, Ngonda Saasa, Daniel Bridges                                                                                                                                                                                                                                                                                                                                                                                                                                                                                                                                          |
| EPI_ISL_977479                                                                                                 | Lab Loc - Itapeperica da Serra                                                                           | Instituto Adolfo Lutz, Interdisciplinary Procedures Center, Strategic Laboratory                                                                  | Claudio Tavares Sacchi, Claudia Regina Gonçalves, Erica Valessa Ramos Gomes, Karoline Rodrigues Campos                                                                                                                                                                                                                                                                                                                                                                                                                                                                                           |
| EPI_ISL_977500                                                                                                 | LATE - Laboratório de Técnicas Especiais - Hospital Israelita Albert Einstein                            | LATE - Laboratório de Técnicas Especiais - Hospital Israelita Albert Einstein                                                                     | Deyvid Amgarten, Fernanda de Mello Malta, Raquel Riyuzo, Ana Paula Moreira Salles, Pedro Henrique Sebe Rodrigues, João Renato Rebello Pinho                                                                                                                                                                                                                                                                                                                                                                                                                                                      |
| EPI_ISL_977562, EPI_ISL_977563, EPI_ISL_977564                                                                 | Nigeria Centre of Disease Control (NCDC)                                                                 | African Centre of Excellence for Genomics of Infectious Diseases (ACEGID), Redeemer's University                                                  | Olawoye I. B. et al                                                                                                                                                                                                                                                                                                                                                                                                                                                                                                                                                                              |
| EPI_ISL_977569                                                                                                 | University of Michigan Clinical Microbiology Laboratory                                                  | Lauring Lab, University of Michigan, Department of Microbiology and Immunology                                                                    | Valesano                                                                                                                                                                                                                                                                                                                                                                                                                                                                                                                                                                                         |
| EPI_ISL_977983, EPI_ISL_978116, EPI_ISL_978137                                                                 | Chiu Laboratory, University of California, San Francisco                                                 | Chiu Laboratory, University of California, San Francisco                                                                                          | Charles Chiu, Xianding (Wayne) Deng, Candace Wang, Venice Servellita, Jill Hacker, Debra Wadford                                                                                                                                                                                                                                                                                                                                                                                                                                                                                                 |
| EPI_ISL_978310                                                                                                 | Texas Department of State Health Services                                                                | Texas Department of State Health Services                                                                                                         | Bonnie Oh, Anita Pokharel, James Daniel Bonser, Myong Koag, Chung Wang, Rachel Lee, Grace Kubin, Rashmi Tuladhar, Mayela Pedrueza, Maliha Rahman, Jenny Zhang                                                                                                                                                                                                                                                                                                                                                                                                                                    |
| EPI_ISL_978367, EPI_ISL_978482                                                                                 | Arizona State Public Health Laboratory                                                                   | Arizona State Public Health Laboratory                                                                                                            | Trung Huynh, Jessica Escobar, Katherine Fullerton, Nobuko Fukushima, Stacy White, Linda Getsinger, Victor Waddell                                                                                                                                                                                                                                                                                                                                                                                                                                                                                |
| EPI_ISL_978566, EPI_ISL_978636, EPI_ISL_978685, EPI_ISL_978711, EPI_ISL_978786                                 | Helix/Illumina                                                                                           | Respiratory Viruses Branch, Division of Viral Diseases, Centers for Disease Control and Prevention                                                | Peter W. Cook, Dakota Howard, Dhvani Batra, Ben L. Rambo-Martin, Eileen de Feo, Jan Antico, Christine Tran, Matthew Tolentino, Shannon Wickline, Kim Gietzen, Brad Sickler, Jingtao Liu, Eric Allen, Phil Febbo, Summer Galloway, Nicole L. Washington, Simon White, Geraint Levan, Kelly Schiabor Barrett, Elizabeth Cirulli, Alexandre Bolze, Ary Ascencio, Charlotte Rivera-Garcia, Ryan Cho, Jason Nguyen, Sherry Wang, Jimmy Ramirez, Tyler Cassens, Efrén Sandoval, Magnus Isaksson, William Lee, David Becker, Marc Laurent, James Lu, Clinton R. Paden, Suxiang Tong, Duncan MacCannell, |
| EPI_ISL_978918                                                                                                 | Centre for Dengue Research and AICBU, Department of Immunology and Molecular Medicine                    | Centre for Dengue Research and AICBU, Department of Immunology and Molecular Medicine                                                             | Chandima Jeewandara, Deshni Jayathilaka, Dinuka Ariyaratne, Tibutius Thanesh Pramanayagam, Diyanath Ranasinghe, Laksiri Gomes, Gathsaurie Neelika Malavige                                                                                                                                                                                                                                                                                                                                                                                                                                       |
| EPI_ISL_978957                                                                                                 | Chiu Laboratory, University of California, San Francisco                                                 | Chiu Laboratory, University of California, San Francisco                                                                                          | Charles Chiu, Xianding (Wayne) Deng, Candace Wang, Venice Servellita, Jill Hacker, Debra Wadford                                                                                                                                                                                                                                                                                                                                                                                                                                                                                                 |
| EPI_ISL_979010                                                                                                 | Santa Clara County Public Health Laboratory                                                              | Chan-Zuckerberg Biohub                                                                                                                            | CZB Ctiahub Consortium                                                                                                                                                                                                                                                                                                                                                                                                                                                                                                                                                                           |
| EPI_ISL_979331                                                                                                 | Laboratorio Estatal de Salud Pública de Nuevo León                                                       | Laboratorio de Infectología Molecular, Departamento de Bioquímica y Medicina Molecular, Facultad de Medicina - Universidad Autónoma de Nuevo León | Kame A. Galán-Huerta, María F. Herrera-Saldivar, Natalia Martínez-Acuña, Sonia A. Lozano-Sepúlveda, Daniel Arellanos-Soto, Ana M. Rivas-Estilla, Samuel Buentello-Wong, Else del Carmen García-García, Gloria A. Jasso-de-la-Peña, Roberto Montes-de-Oca, Consuelo Treviño-Garza, Manuel E. de-la-O-Cavazos                                                                                                                                                                                                                                                                                      |
| EPI_ISL_979360                                                                                                 | Microbiological Diagnostic Unit - Public Health Laboratory (MDU-PHL)                                     | MDU-PHL                                                                                                                                           | Seemann T., Sait, M.L., Sherry, N.L.                                                                                                                                                                                                                                                                                                                                                                                                                                                                                                                                                             |
| EPI_ISL_979362, EPI_ISL_979363, EPI_ISL_979364                                                                 | Victorian Infectious Diseases Reference Laboratory (VIDRL)                                               | VIDRL and MDU-PHL                                                                                                                                 | Caly L., Seemann T., Sait, M.L., Druce J., Sherry, N.L.                                                                                                                                                                                                                                                                                                                                                                                                                                                                                                                                          |
| EPI_ISL_979414, EPI_ISL_979429                                                                                 | New Mexico Department of Health Scientific Laboratory                                                    | New Mexico Department of Health Scientific Laboratory                                                                                             | Ellie Johnson, Anastacia Griego-Fisher, D'eldra Malone, Jennifer Benoit                                                                                                                                                                                                                                                                                                                                                                                                                                                                                                                          |
| EPI_ISL_979460, EPI_ISL_979504, EPI_ISL_979510, EPI_ISL_979522, EPI_ISL_979532                                 | Eurofins Diatherix                                                                                       | HudsonAlpha Genome Sequencing Center                                                                                                              | Jane Grimwood, Melissa Williams, Lori H. Handley, Joshua Stough, Leslie Malone, Stefan Brzezinski, Ada Stewart, Teresa Jones, Jenell Webber, John Lovell, Jennifer Cart, and Jeremy Schmutz                                                                                                                                                                                                                                                                                                                                                                                                      |
| EPI_ISL_979586                                                                                                 | Santa Clara County Public Health Laboratory                                                              | Chan-Zuckerberg Biohub                                                                                                                            | CZB Ctiahub Consortium                                                                                                                                                                                                                                                                                                                                                                                                                                                                                                                                                                           |
| EPI_ISL_980406, EPI_ISL_980503                                                                                 | Lighthouse Lab in Cambridge                                                                              | Wellcome Sanger Institute for the COVID-19 Genomics UK (COG-UK) Consortium                                                                        | Rob Howes, The Lighthouse Lab in Cambridge and Alex Alderton, Roberto Amato, Sonia Goncalves, Ewan Harrison, David K. Jackson, Ian Johnston, Dominic Kwiatkowski, Cordelia Langford, John Sillitoe on behalf of the Wellcome Sanger Institute COVID-19 Surveillance Team                                                                                                                                                                                                                                                                                                                         |
| EPI_ISL_980980                                                                                                 | Innovative Genomics Institute, UC Berkeley                                                               | Innovative Genomics Institute, UC Berkeley                                                                                                        | Stacia Wyman, Haridha Shivram, Phil Frankino, Liana Lareau                                                                                                                                                                                                                                                                                                                                                                                                                                                                                                                                       |
| EPI_ISL_981039, EPI_ISL_981040                                                                                 | Hospital Privado Regional                                                                                | Laboratorio Central Mg. Luis Alfredo PIANCIOLA on behalf of                                                                                       | L PIANCIOLA, M Mazzeo, C Ziehm, C Pintos, M Fernandez, J Ousset, M Nabaes, M Viegas.                                                                                                                                                                                                                                                                                                                                                                                                                                                                                                             |



|                                                                                                                                                                                                                |                                                                         |                                                                                                                                                                                                                                       |                                                                                                                                                                                                      |
|----------------------------------------------------------------------------------------------------------------------------------------------------------------------------------------------------------------|-------------------------------------------------------------------------|---------------------------------------------------------------------------------------------------------------------------------------------------------------------------------------------------------------------------------------|------------------------------------------------------------------------------------------------------------------------------------------------------------------------------------------------------|
| EPI_ISL_981042, EPI_ISL_981043, EPI_ISL_981044, EPI_ISL_981045                                                                                                                                                 | Hospital Bariloche                                                      | 'Proyecto Argentino Interinstitucional de genómica de SARS-CoV-2' (PAIS Consortium)<br>Laboratorio Central Mg. Luis Alfredo Pianiola on behalf of 'Proyecto Argentino Interinstitucional de genómica de SARS-CoV-2' (PAIS Consortium) | L Pianiola, M Mazzeo, C Ziehm, C Pintos, M Fernandez, J Ousset, M Nabaes, M Viegas.                                                                                                                  |
| EPI_ISL_981046, EPI_ISL_981047                                                                                                                                                                                 | Hospital Jacobacci                                                      | Laboratorio Central Mg. Luis Alfredo Pianiola on behalf of 'Proyecto Argentino Interinstitucional de genómica de SARS-CoV-2' (PAIS Consortium)                                                                                        | L Pianiola, M Mazzeo, C Ziehm, C Pintos, M Fernandez, J Ousset, M Nabaes, M Viegas.                                                                                                                  |
| EPI_ISL_981053                                                                                                                                                                                                 | Hospital Dr. Francisco López Lima                                       | Laboratorio Central Mg. Luis Alfredo Pianiola on behalf of 'Proyecto Argentino Interinstitucional de genómica de SARS-CoV-2' (PAIS Consortium)                                                                                        | L Pianiola, M Mazzeo, C Ziehm, C Pintos, M Fernandez, J Ousset, M Nabaes, M Viegas.                                                                                                                  |
| EPI_ISL_981100, EPI_ISL_981125, EPI_ISL_981165, EPI_ISL_981198                                                                                                                                                 | Johns Hopkins Hospital Department of Pathology                          | Johns Hopkins Hospital Department of Pathology                                                                                                                                                                                        | C. Paul Morris, Chun Huai Luo, Adannaya Amadi, Matthew Schwartz, Nicholas Gallagher, Heba H. Mostafa                                                                                                 |
| EPI_ISL_981356                                                                                                                                                                                                 | Hospital Universitari Vall d'Hebron - Vall d'Hebron Institut de Recerca | Hospital Universitari Vall d'Hebron - Vall d'Hebron Institut de Recerca                                                                                                                                                               | Cristina Andrés, María Piñana, Josep F Abril, Damir Garcia-Cehic, Ariadna Rando, Juliana Esperalba, María Gema Codina, Carla Castillo, María Carmen Martín, Tomàs Pumarola, Josep Quer, Andrés Antón |
| EPI_ISL_982299                                                                                                                                                                                                 | BCCDC Public Health Laboratory                                          | BCCDC Public Health Laboratory                                                                                                                                                                                                        | Prystajeky Natalie, John Tyson, Dan Fornika, Shannon Russell, Kim Macdonald, Kimia Karmelian, Ana Pacagnella, Corrinne Ng, Loretta Janz, Robert Azana, Mel Kraiden                                   |
| EPI_ISL_982375, EPI_ISL_982410                                                                                                                                                                                 | M Health Fairview                                                       | Minnesota Department of Health, Public Health Laboratory                                                                                                                                                                              | Alexandra Lorentz, Jacob Garfin, Matt Plumb, and Xiong Wang                                                                                                                                          |
| EPI_ISL_982426, EPI_ISL_982431, EPI_ISL_982435, EPI_ISL_982436, EPI_ISL_982437, EPI_ISL_982440, EPI_ISL_982442, EPI_ISL_982444, EPI_ISL_982453, EPI_ISL_982458, EPI_ISL_982461, EPI_ISL_982470, EPI_ISL_982480 | MONTEFIORE MEDICAL CENTER LABORATORIES                                  | Wadsworth Center, New York State Department of Health                                                                                                                                                                                 | Kirsten St. George, Daryl M. Lamson, Alexis Russel, Matthew Shudt, Melissa A Leisner, Jonathan Plitnick, Navjot Singh, John Kelly, Erasmus Schneider, Erica Lasek-Nesselquist                        |
| EPI_ISL_982710, EPI_ISL_982738, EPI_ISL_982753, EPI_ISL_982754                                                                                                                                                 | US Air Force School of Aerospace Medicine                               | US Air Force School of Aerospace Medicine                                                                                                                                                                                             | Anthony Fries, Jennifer Meyer, William Gruner, William Buggele, Amanda Javorina, Sarah Purves, Clarise Starr, Elizabeth Macias                                                                       |
| EPI_ISL_983099, EPI_ISL_983107, EPI_ISL_983108, EPI_ISL_983111, EPI_ISL_983112, EPI_ISL_983114                                                                                                                 | MONTEFIORE MEDICAL CENTER LABORATORIES                                  | Wadsworth Center, New York State Department of Health                                                                                                                                                                                 | Kirsten St. George, Daryl M. Lamson, Alexis Russel, Matthew Shudt, Melissa A Leisner, Jonathan Plitnick, Navjot Singh, John Kelly, Erasmus Schneider, Erica Lasek-Nesselquist                        |
| EPI_ISL_983122                                                                                                                                                                                                 | THE MARY IMOGENE BASSETT HOSPITAL                                       | Wadsworth Center, New York State Department of Health                                                                                                                                                                                 | Kirsten St. George, Daryl M. Lamson, Alexis Russel, Matthew Shudt, Melissa A Leisner, Jonathan Plitnick, Navjot Singh, John Kelly, Erasmus Schneider, Erica Lasek-Nesselquist                        |
| EPI_ISL_983137, EPI_ISL_983144, EPI_ISL_983158, EPI_ISL_983161, EPI_ISL_983169, EPI_ISL_983170                                                                                                                 | MONTEFIORE MEDICAL CENTER LABORATORIES                                  | Wadsworth Center, New York State Department of Health                                                                                                                                                                                 | Kirsten St. George, Daryl M. Lamson, Alexis Russel, Matthew Shudt, Melissa A Leisner, Jonathan Plitnick, Navjot Singh, John Kelly, Erasmus Schneider, Erica Lasek-Nesselquist                        |
| EPI_ISL_983240, EPI_ISL_983242, EPI_ISL_983244, EPI_ISL_983250, EPI_ISL_983268, EPI_ISL_983270, EPI_ISL_983271, EPI_ISL_983285                                                                                 | KALEIDA CENTER FOR LABORATORY MEDICINE                                  | Wadsworth Center, New York State Department of Health                                                                                                                                                                                 | Kirsten St. George, Daryl M. Lamson, Alexis Russel, Matthew Shudt, Melissa A Leisner, Jonathan Plitnick, Navjot Singh, John Kelly, Erasmus Schneider, Erica Lasek-Nesselquist                        |
| EPI_ISL_983312, EPI_ISL_983314, EPI_ISL_983316                                                                                                                                                                 | SUNY UPSTATE MEDICAL UNIVERSITY                                         | Wadsworth Center, New York State Department of Health                                                                                                                                                                                 | Kirsten St. George, Daryl M. Lamson, Alexis Russel, Matthew Shudt, Melissa A Leisner, Jonathan Plitnick, Navjot Singh, John Kelly, Erasmus Schneider, Erica Lasek-Nesselquist                        |
| EPI_ISL_983442, EPI_ISL_983443                                                                                                                                                                                 | URMC LABS                                                               | Wadsworth Center, New York State Department of Health                                                                                                                                                                                 | Kirsten St. George, Daryl M. Lamson, Alexis Russel, Matthew Shudt, Melissa A Leisner, Jonathan Plitnick, Navjot Singh, John Kelly, Erasmus Schneider, Erica Lasek-Nesselquist                        |
| EPI_ISL_983445                                                                                                                                                                                                 | THE MARY IMOGENE BASSETT HOSPITAL                                       | Wadsworth Center, New York State Department of Health                                                                                                                                                                                 | Kirsten St. George, Daryl M. Lamson, Alexis Russel, Matthew Shudt, Melissa A Leisner, Jonathan Plitnick, Navjot Singh, John Kelly, Erasmus Schneider, Erica Lasek-Nesselquist                        |
| EPI_ISL_983451, EPI_ISL_983452, EPI_ISL_983457, EPI_ISL_983463, EPI_ISL_983465, EPI_ISL_983466, EPI_ISL_983474, EPI_ISL_983478, EPI_ISL_983480, EPI_ISL_983483, EPI_ISL_983484                                 | URMC LABS                                                               | Wadsworth Center, New York State Department of Health                                                                                                                                                                                 | Kirsten St. George, Daryl M. Lamson, Alexis Russel, Matthew Shudt, Melissa A Leisner, Jonathan Plitnick, Navjot Singh, John Kelly, Erasmus Schneider, Erica Lasek-Nesselquist                        |
| EPI_ISL_983604, EPI_ISL_983611, EPI_ISL_983623                                                                                                                                                                 | Texas Department of State Health Services                               | Texas Department of State Health Services                                                                                                                                                                                             | Bonnie Oh, Anita Pokharel, James Daniel Bonser, Myong Koag, Chung Wang, Rachel Lee, Grace Kubin, Rashmi Tuladhar, Mayela Pedrueza, Maliha Rahman, Jenny Zhang                                        |
| EPI_ISL_983650, EPI_ISL_983651, EPI_ISL_983652, EPI_ISL_983664                                                                                                                                                 | Vault Health                                                            | Minnesota Department of Health, Public Health Laboratory                                                                                                                                                                              | Alexandra Lorentz, Jacob Garfin, Matt Plumb, and Xiong Wang                                                                                                                                          |
| EPI_ISL_983699, EPI_ISL_983700, EPI_ISL_983701, EPI_ISL_983702, EPI_ISL_983704                                                                                                                                 | Essentia Health-St. Mary's Medical Center                               | Minnesota Department of Health, Public Health Laboratory                                                                                                                                                                              | Alexandra Lorentz, Jacob Garfin, Matt Plumb, and Xiong Wang                                                                                                                                          |
| EPI_ISL_983718, EPI_ISL_983733, EPI_ISL_983736, EPI_ISL_983737, EPI_ISL_983780, EPI_ISL_983857                                                                                                                 | Colorado Department of Public Health and Environment                    | Colorado Department of Puplic Health and Environment                                                                                                                                                                                  | Laura Bankers, Molly C. Hetherington-Rauth, Diana Ir, Shannon Ely, Shannon R. Matzinger, Sarah Elizabeth Totten, Emily A. Travanty                                                                   |
| EPI_ISL_983863, EPI_ISL_983864, EPI_ISL_983865, EPI_ISL_983866, EPI_ISL_983867, EPI_ISL_983868                                                                                                                 | Central Laboratory of Public Health of Rio Grande do Sul (Lacen-RS)     | State Center for Health Surveillance of the Health Department of the State of Rio Grande do Sul (CEVS/SES-RS)                                                                                                                         | Aline Campos, Cynthia Molina, Lara Crescente, Leticia Garay, Ludmila Fiorenzano Baethgen, Richard Salvato, Tatiana Gregianini                                                                        |
| EPI_ISL_984034, EPI_ISL_984040, EPI_ISL_984044, EPI_ISL_984186, EPI_ISL_984233                                                                                                                                 | Wisconsin State Laboratory of Hygiene Communicable Disease Division     | Wisconsin State Laboratory of Hygiene Communicable Disease Division                                                                                                                                                                   | Kelsey R. Florek, Abigail C. Shockey                                                                                                                                                                 |
| EPI_ISL_984243                                                                                                                                                                                                 | Instituto Adolfo Lutz - Regional de Marilia                             | Instituto Adolfo Lutz, Interdisciplinary Procedures Center, Strategic Laboratory                                                                                                                                                      | Claudio Tavares Sacchi, Claudia Regina Gonçalves, Erica Valessa Ramos Gomes, Karoline Rodrigues Campos                                                                                               |
| EPI_ISL_984582                                                                                                                                                                                                 | California Department of Public Health                                  | Chiu Laboratory, University of California, San Francisco                                                                                                                                                                              | Charles Chiu, Xianding (Wayne) Deng, Candace Wang, Venice Servellita, Jill Hacker, Debra Wadford                                                                                                     |
| EPI_ISL_984619, EPI_ISL_984620, EPI_ISL_984621                                                                                                                                                                 | Central Laboratory of Public Health of Rio Grande do Sul (Lacen-RS)     | State Center for Health Surveillance of the Health Department of the State of Rio Grande do Sul (CEVS/SES-RS)                                                                                                                         | Aline Campos, Cynthia Molina, Lara Crescente, Leticia Garay, Ludmila Fiorenzano Baethgen, Richard Salvato, Tatiana Gregianini                                                                        |
